# Supplementary material
Source: publisher figshare collection journal article supplement (https://acs.figshare.com/ndownloader/files/8342882)
Supplement: Supplementary file 1 [file 8342882]

 
data_3
 
_audit_creation_method            'SHELXL-2014/7'
_shelx_SHELXL_version_number      '2014/7'
_chemical_name_systematic         ?
_chemical_name_common             ?
_chemical_melting_point           ?
_chemical_formula_moiety          ?
_chemical_formula_sum
 'C72 H112 Al2 N8 O3' 
_chemical_formula_weight          1191.65

loop_
 _atom_type_symbol
 _atom_type_description
 _atom_type_scat_dispersion_real
 _atom_type_scat_dispersion_imag
 _atom_type_scat_source
 'C'  'C'   0.0033   0.0016
 'International Tables Vol C Tables 4.2.6.8 and 6.1.1.4'
 'H'  'H'   0.0000   0.0000
 'International Tables Vol C Tables 4.2.6.8 and 6.1.1.4'
 'N'  'N'   0.0061   0.0033
 'International Tables Vol C Tables 4.2.6.8 and 6.1.1.4'
 'O'  'O'   0.0106   0.0060
 'International Tables Vol C Tables 4.2.6.8 and 6.1.1.4'
 'Al'  'Al'   0.0645   0.0514
 'International Tables Vol C Tables 4.2.6.8 and 6.1.1.4'
 
_space_group_crystal_system       monoclinic
_space_group_IT_number            4
_space_group_name_H-M_alt         'P 21'
_space_group_name_Hall            'P 2yb'
 
_shelx_space_group_comment
;
The symmetry employed for this shelxl refinement is uniquely defined
by the following loop, which should always be used as a source of
symmetry information in preference to the above space-group names.
They are only intended as comments.
;
 
loop_
 _space_group_symop_operation_xyz
 'x, y, z'
 '-x, y+1/2, -z'
 
_cell_length_a                    8.9776(18)
_cell_length_b                    35.496(7)
_cell_length_c                    11.535(2)
_cell_angle_alpha                 90
_cell_angle_beta                  98.931(2)
_cell_angle_gamma                 90
_cell_volume                      3631.3(13)
_cell_formula_units_Z             2
_cell_measurement_temperature     200(2)
_cell_measurement_reflns_used      9917
_cell_measurement_theta_min        2.30
_cell_measurement_theta_max       26.02
 
_exptl_crystal_description        block
_exptl_crystal_colour             colorless
_exptl_crystal_density_meas       ?
_exptl_crystal_density_method     ?
_exptl_crystal_density_diffrn     1.090          
_exptl_crystal_F_000              1300
_exptl_transmission_factor_min    ?
_exptl_transmission_factor_max    ?
_exptl_crystal_size_max           0.500
_exptl_crystal_size_mid           0.400
_exptl_crystal_size_min           0.300
_exptl_absorpt_coefficient_mu     0.089
_shelx_estimated_absorpt_T_min    0.957
_shelx_estimated_absorpt_T_max    0.974
_exptl_absorpt_correction_type    multi-scan
_exptl_absorpt_correction_T_min   0.6326  
_exptl_absorpt_correction_T_max   0.7457
_exptl_absorpt_process_details    'SADABS, Bruker (2003)'
_exptl_absorpt_special_details    ?
_diffrn_ambient_temperature       200(2)
_diffrn_radiation_wavelength      0.71073
_diffrn_radiation_type            MoK\a
_diffrn_source                    ?
_diffrn_measurement_device_type   'Bruker APEX-II CCD' 
_diffrn_measurement_method        '\f and \w scans' 
_diffrn_detector_area_resol_mean  ?
_diffrn_reflns_number             44069
_diffrn_reflns_av_unetI/netI      0.0591
_diffrn_reflns_av_R_equivalents   0.0417
_diffrn_reflns_limit_h_min        -11
_diffrn_reflns_limit_h_max        11
_diffrn_reflns_limit_k_min        -45
_diffrn_reflns_limit_k_max        47
_diffrn_reflns_limit_l_min        -14
_diffrn_reflns_limit_l_max        15
_diffrn_reflns_theta_min          1.877
_diffrn_reflns_theta_max          28.315
_diffrn_reflns_theta_full         25.242
_diffrn_measured_fraction_theta_max   0.985
_diffrn_measured_fraction_theta_full  1.000
_diffrn_reflns_Laue_measured_fraction_max    0.985
_diffrn_reflns_Laue_measured_fraction_full   1.000
_diffrn_reflns_point_group_measured_fraction_max   0.961
_diffrn_reflns_point_group_measured_fraction_full  0.998
_reflns_number_total              17364
_reflns_number_gt                 12646
_reflns_threshold_expression      'I > 2\s(I)'
_reflns_Friedel_coverage          0.922
_reflns_Friedel_fraction_max      0.937
_reflns_Friedel_fraction_full     0.997
 
_reflns_special_details
;
 Reflections were merged by SHELXL according to the crystal
 class for the calculation of statistics and refinement.
 
 _reflns_Friedel_fraction is defined as the number of unique
 Friedel pairs measured divided by the number that would be
 possible theoretically, ignoring centric projections and
 systematic absences.
;
 
_computing_data_collection        'APEX II (Bruker, 2009)' 
_computing_cell_refinement        'APEX II (Bruker, 2009)' 
_computing_data_reduction         'SAINT (Bruker)' 
_computing_structure_solution     'XT (Sheldrick, 2014)'
_computing_structure_refinement   'SHELXL-2014/7 (Sheldrick, 2014)'
_computing_molecular_graphics     'Mercury (Macrae et al., 2008)'
_computing_publication_material   'CIFTAB (Sheldrick, 1997)'

_refine_special_details           ?
_refine_ls_structure_factor_coef  Fsqd
_refine_ls_matrix_type            full
_refine_ls_weighting_scheme       calc
_refine_ls_weighting_details
'w=1/[\s^2^(Fo^2^)+(0.0719P)^2^+0.0374P] where P=(Fo^2^+2Fc^2^)/3'
_atom_sites_solution_primary      ?
_atom_sites_solution_secondary    ?
_atom_sites_solution_hydrogens    mixed
_refine_ls_hydrogen_treatment     mixed
_refine_ls_extinction_method      none
_refine_ls_extinction_coef        .
_refine_ls_abs_structure_details
;
 Flack x determined using 4705 quotients [(I+)-(I-)]/[(I+)+(I-)]
 (Parsons, Flack and Wagner, Acta Cryst. B69 (2013) 249-259).
;
_refine_ls_abs_structure_Flack    -0.01(6)
_chemical_absolute_configuration  ?
_refine_ls_number_reflns          17364
_refine_ls_number_parameters      814
_refine_ls_number_restraints      1
_refine_ls_R_factor_all           0.0802
_refine_ls_R_factor_gt            0.0517
_refine_ls_wR_factor_ref          0.1316
_refine_ls_wR_factor_gt           0.1169
_refine_ls_goodness_of_fit_ref    0.989
_refine_ls_restrained_S_all       0.989
_refine_ls_shift/su_max           0.000
_refine_ls_shift/su_mean          0.000
 
loop_
 _atom_site_label
 _atom_site_type_symbol
 _atom_site_fract_x
 _atom_site_fract_y
 _atom_site_fract_z
 _atom_site_U_iso_or_equiv
 _atom_site_adp_type
 _atom_site_occupancy
 _atom_site_site_symmetry_order  
 _atom_site_calc_flag
 _atom_site_refinement_flags_posn
 _atom_site_refinement_flags_adp
 _atom_site_refinement_flags_occupancy
 _atom_site_disorder_assembly
 _atom_site_disorder_group
Al1 Al 0.50466(9) 0.38161(3) 0.90173(7) 0.0287(2) Uani 1 1 d . . . . .
Al2 Al 0.87817(9) 0.61976(3) 0.63797(8) 0.0306(2) Uani 1 1 d . . . . .
O1 O 0.7049(2) 0.37418(7) 0.9056(2) 0.0414(6) Uani 1 1 d . . . . .
O2 O 0.6835(2) 0.62160(7) 0.6602(2) 0.0450(6) Uani 1 1 d . . . . .
O3 O 0.3139(4) 0.61718(16) 0.2190(3) 0.1130(14) Uani 1 1 d . . . . .
N1 N 0.3972(3) 0.34313(7) 0.8205(2) 0.0290(5) Uani 1 1 d . . . . .
N2 N 0.4579(2) 0.37466(7) 1.0496(2) 0.0282(5) Uani 1 1 d . . . . .
N3 N 0.8731(3) 0.38576(10) 0.7788(3) 0.0512(8) Uani 1 1 d . . . . .
N4 N 0.9090(3) 0.41388(9) 0.9497(3) 0.0490(8) Uani 1 1 d . . . . .
N5 N 0.9737(3) 0.58022(7) 0.7201(2) 0.0334(6) Uani 1 1 d . . . . .
N6 N 0.9811(3) 0.66032(7) 0.7099(2) 0.0311(6) Uani 1 1 d . . . . .
N7 N 0.4691(3) 0.59237(9) 0.5662(3) 0.0523(8) Uani 1 1 d . . . . .
N8 N 0.4726(3) 0.65344(9) 0.5745(3) 0.0511(8) Uani 1 1 d . . . . .
C1 C 0.1697(4) 0.30322(11) 0.7854(3) 0.0434(8) Uani 1 1 d . . . . .
H1A H 0.1429 0.3146 0.7076 0.065 Uiso 1 1 calc R U . . .
H1B H 0.0780 0.2990 0.8199 0.065 Uiso 1 1 calc R U . . .
H1C H 0.2208 0.2791 0.7782 0.065 Uiso 1 1 calc R U . . .
C2 C 0.2705(3) 0.32859(9) 0.8610(3) 0.0309(7) Uani 1 1 d . . . . .
C3 C 0.2355(3) 0.33812(9) 0.9699(3) 0.0312(7) Uani 1 1 d . . . . .
H3A H 0.1393 0.3298 0.9838 0.037 Uiso 1 1 calc R U . . .
C4 C 0.3201(3) 0.35844(9) 1.0649(3) 0.0285(6) Uani 1 1 d . . . . .
C5 C 0.2632(4) 0.36151(11) 1.1706(3) 0.0394(8) Uani 1 1 d . . . . .
C6 C 0.4416(3) 0.32555(10) 0.7192(3) 0.0345(7) Uani 1 1 d . . . . .
C7 C 0.4095(3) 0.34277(10) 0.6079(3) 0.0345(7) Uani 1 1 d . . . . .
C8 C 0.4646(4) 0.32571(12) 0.5141(3) 0.0489(9) Uani 1 1 d . . . . .
H8A H 0.4461 0.3372 0.4390 0.059 Uiso 1 1 calc R U . . .
C9 C 0.5444(5) 0.29280(13) 0.5277(4) 0.0639(12) Uani 1 1 d . . . . .
H9A H 0.5811 0.2818 0.4625 0.077 Uiso 1 1 calc R U . . .
C10 C 0.5716(5) 0.27566(12) 0.6347(3) 0.0581(11) Uani 1 1 d . . . . .
H10A H 0.6244 0.2524 0.6426 0.070 Uiso 1 1 calc R U . . .
C11 C 0.5232(4) 0.29172(10) 0.7326(3) 0.0424(8) Uani 1 1 d . . . . .
C12 C 0.5657(5) 0.27219(11) 0.8512(3) 0.0522(10) Uani 1 1 d . . . . .
H12A H 0.5189 0.2866 0.9108 0.063 Uiso 1 1 calc R U . . .
C13 C 0.5051(7) 0.23144(16) 0.8479(5) 0.0893(16) Uani 1 1 d . . . . .
H13A H 0.3949 0.2318 0.8280 0.134 Uiso 1 1 calc R U . . .
H13B H 0.5340 0.2197 0.9250 0.134 Uiso 1 1 calc R U . . .
H13C H 0.5479 0.2170 0.7886 0.134 Uiso 1 1 calc R U . . .
C14 C 0.7354(5) 0.27248(14) 0.8886(4) 0.0670(12) Uani 1 1 d . . . . .
H14A H 0.7599 0.2621 0.9680 0.100 Uiso 1 1 calc R U . . .
H14B H 0.7728 0.2984 0.8878 0.100 Uiso 1 1 calc R U . . .
H14C H 0.7831 0.2571 0.8341 0.100 Uiso 1 1 calc R U . . .
C15 C 0.3166(3) 0.37847(10) 0.5874(3) 0.0391(7) Uani 1 1 d . . . . .
H15A H 0.2889 0.3865 0.6644 0.047 Uiso 1 1 calc R U . . .
C16 C 0.4047(5) 0.41032(12) 0.5423(4) 0.0609(11) Uani 1 1 d . . . . .
H16A H 0.3442 0.4334 0.5367 0.091 Uiso 1 1 calc R U . . .
H16B H 0.4280 0.4038 0.4645 0.091 Uiso 1 1 calc R U . . .
H16C H 0.4988 0.4143 0.5965 0.091 Uiso 1 1 calc R U . . .
C17 C 0.1699(4) 0.37142(12) 0.5024(3) 0.0534(10) Uani 1 1 d . . . . .
H17A H 0.1084 0.3944 0.4955 0.080 Uiso 1 1 calc R U . . .
H17B H 0.1137 0.3509 0.5324 0.080 Uiso 1 1 calc R U . . .
H17C H 0.1939 0.3645 0.4252 0.080 Uiso 1 1 calc R U . . .
C18 C 0.5516(3) 0.38723(9) 1.1541(2) 0.0297(6) Uani 1 1 d . . . . .
C19 C 0.5346(3) 0.42366(9) 1.1987(3) 0.0349(7) Uani 1 1 d . . . . .
C20 C 0.6307(4) 0.43510(11) 1.2988(3) 0.0477(9) Uani 1 1 d . . . . .
H20A H 0.6205 0.4597 1.3293 0.057 Uiso 1 1 calc R U . . .
C21 C 0.7401(4) 0.41142(13) 1.3542(3) 0.0556(10) Uani 1 1 d . . . . .
H21A H 0.8047 0.4197 1.4225 0.067 Uiso 1 1 calc R U . . .
C22 C 0.7570(4) 0.37574(11) 1.3116(3) 0.0492(9) Uani 1 1 d . . . . .
H22A H 0.8320 0.3595 1.3518 0.059 Uiso 1 1 calc R U . . .
C23 C 0.6656(3) 0.36302(10) 1.2103(3) 0.0350(7) Uani 1 1 d . . . . .
C24 C 0.6907(3) 0.32417(10) 1.1613(3) 0.0368(7) Uani 1 1 d . . . . .
H24A H 0.6653 0.3263 1.0740 0.044 Uiso 1 1 calc R U . . .
C25 C 0.8530(5) 0.31123(18) 1.1870(6) 0.105(2) Uani 1 1 d . . . . .
H25A H 0.9185 0.3305 1.1607 0.157 Uiso 1 1 calc R U . . .
H25B H 0.8643 0.2876 1.1454 0.157 Uiso 1 1 calc R U . . .
H25C H 0.8814 0.3072 1.2717 0.157 Uiso 1 1 calc R U . . .
C26 C 0.5875(6) 0.29430(13) 1.1983(5) 0.0852(17) Uani 1 1 d . . . . .
H26A H 0.6088 0.2701 1.1636 0.128 Uiso 1 1 calc R U . . .
H26B H 0.4823 0.3014 1.1712 0.128 Uiso 1 1 calc R U . . .
H26C H 0.6045 0.2921 1.2840 0.128 Uiso 1 1 calc R U . . .
C27 C 0.4154(4) 0.45101(10) 1.1393(3) 0.0415(8) Uani 1 1 d . . . . .
H27A H 0.3482 0.4367 1.0772 0.050 Uiso 1 1 calc R U . . .
C28 C 0.4883(6) 0.48278(12) 1.0786(4) 0.0703(13) Uani 1 1 d . . . . .
H28A H 0.5441 0.4721 1.0197 0.105 Uiso 1 1 calc R U . . .
H28B H 0.5578 0.4968 1.1370 0.105 Uiso 1 1 calc R U . . .
H28C H 0.4099 0.4998 1.0402 0.105 Uiso 1 1 calc R U . . .
C29 C 0.3172(5) 0.46667(13) 1.2245(4) 0.0664(12) Uani 1 1 d . . . . .
H29A H 0.2386 0.4828 1.1819 0.100 Uiso 1 1 calc R U . . .
H29B H 0.3797 0.4814 1.2854 0.100 Uiso 1 1 calc R U . . .
H29C H 0.2701 0.4458 1.2610 0.100 Uiso 1 1 calc R U . . .
C30 C 0.8215(3) 0.39080(10) 0.8795(3) 0.0393(8) Uani 1 1 d . . . . .
C31 C 1.0140(4) 0.40628(12) 0.7774(4) 0.0556(11) Uani 1 1 d . . . . .
H31A H 1.0046 0.4244 0.7114 0.067 Uiso 1 1 calc R U . . .
H31B H 1.0984 0.3888 0.7716 0.067 Uiso 1 1 calc R U . . .
C32 C 1.0363(4) 0.42657(12) 0.8945(4) 0.0583(11) Uani 1 1 d . . . . .
H32A H 1.1335 0.4194 0.9424 0.070 Uiso 1 1 calc R U . . .
H32B H 1.0339 0.4542 0.8835 0.070 Uiso 1 1 calc R U . . .
C33 C 0.8078(4) 0.36199(15) 0.6824(3) 0.0632(12) Uani 1 1 d . . . . .
H33A H 0.8805 0.3425 0.6688 0.095 Uiso 1 1 calc R U . . .
H33B H 0.7823 0.3773 0.6114 0.095 Uiso 1 1 calc R U . . .
H33C H 0.7163 0.3500 0.7015 0.095 Uiso 1 1 calc R U . . .
C34 C 0.8935(5) 0.42391(13) 1.0678(4) 0.0644(12) Uani 1 1 d . . . . .
H34A H 0.8952 0.4514 1.0757 0.097 Uiso 1 1 calc R U . . .
H34B H 0.9770 0.4130 1.1222 0.097 Uiso 1 1 calc R U . . .
H34C H 0.7976 0.4142 1.0860 0.097 Uiso 1 1 calc R U . . .
C41 C 1.2006(5) 0.55198(12) 0.8293(4) 0.0578(11) Uani 1 1 d . . . . .
C42 C 1.1189(3) 0.58335(9) 0.7837(3) 0.0361(7) Uani 1 1 d . . . . .
C43 C 1.1861(3) 0.61982(10) 0.8000(3) 0.0370(7) Uani 1 1 d . . . . .
H43A H 1.2887 0.6198 0.8360 0.044 Uiso 1 1 calc R U . . .
C44 C 1.1260(3) 0.65503(9) 0.7720(3) 0.0342(7) Uani 1 1 d . . . . .
C45 C 1.2177(4) 0.68859(11) 0.8076(4) 0.0495(9) Uani 1 1 d . . . . .
H45A H 1.2190 0.7050 0.7394 0.074 Uiso 1 1 calc R U . . .
H45B H 1.3209 0.6809 0.8389 0.074 Uiso 1 1 calc R U . . .
H45C H 1.1743 0.7023 0.8681 0.074 Uiso 1 1 calc R U . . .
C46 C 0.9020(3) 0.54389(9) 0.7185(3) 0.0367(8) Uani 1 1 d . . . . .
C47 C 0.8249(4) 0.53370(10) 0.8120(3) 0.0466(9) Uani 1 1 d . . . . .
C48 C 0.7431(5) 0.50023(11) 0.8038(4) 0.0586(11) Uani 1 1 d . . . . .
H48A H 0.6910 0.4932 0.8662 0.070 Uiso 1 1 calc R U . . .
C49 C 0.7362(5) 0.47746(11) 0.7094(5) 0.0613(12) Uani 1 1 d . . . . .
H49A H 0.6777 0.4550 0.7048 0.074 Uiso 1 1 calc R U . . .
C50 C 0.8143(5) 0.48689(11) 0.6197(4) 0.0610(12) Uani 1 1 d . . . . .
H50A H 0.8098 0.4706 0.5540 0.073 Uiso 1 1 calc R U . . .
C51 C 0.9001(4) 0.51991(10) 0.6228(4) 0.0453(9) Uani 1 1 d . . . . .
C52 C 0.9887(5) 0.52804(12) 0.5243(4) 0.0637(12) Uani 1 1 d . . . . .
H52A H 1.0388 0.5530 0.5412 0.076 Uiso 1 1 calc R U . . .
C53 C 1.1157(7) 0.49833(16) 0.5240(6) 0.101(2) Uani 1 1 d . . . . .
H53A H 1.1756 0.4968 0.6025 0.152 Uiso 1 1 calc R U . . .
H53B H 1.1809 0.5058 0.4672 0.152 Uiso 1 1 calc R U . . .
H53C H 1.0707 0.4737 0.5021 0.152 Uiso 1 1 calc R U . . .
C54 C 0.8911(8) 0.53103(17) 0.4059(5) 0.0978(19) Uani 1 1 d . . . . .
H54A H 0.9545 0.5364 0.3460 0.147 Uiso 1 1 calc R U . . .
H54B H 0.8180 0.5514 0.4074 0.147 Uiso 1 1 calc R U . . .
H54C H 0.8375 0.5072 0.3875 0.147 Uiso 1 1 calc R U . . .
C55 C 0.8242(6) 0.55841(13) 0.9191(4) 0.0650(12) Uani 1 1 d . . . . .
H55A H 0.8875 0.5811 0.9103 0.078 Uiso 1 1 calc R U . . .
C56 C 0.6652(7) 0.57187(16) 0.9302(5) 0.0902(17) Uani 1 1 d . . . . .
H56A H 0.6702 0.5895 0.9961 0.135 Uiso 1 1 calc R U . . .
H56B H 0.6028 0.5502 0.9442 0.135 Uiso 1 1 calc R U . . .
H56C H 0.6206 0.5845 0.8576 0.135 Uiso 1 1 calc R U . . .
C57 C 0.8934(7) 0.53771(17) 1.0325(4) 0.0942(18) Uani 1 1 d . . . . .
H57A H 0.9045 0.5554 1.0986 0.141 Uiso 1 1 calc R U . . .
H57B H 0.9925 0.5276 1.0233 0.141 Uiso 1 1 calc R U . . .
H57C H 0.8270 0.5170 1.0477 0.141 Uiso 1 1 calc R U . . .
C58 C 0.9187(3) 0.69769(9) 0.7052(3) 0.0358(7) Uani 1 1 d . . . . .
C59 C 0.8611(4) 0.71201(10) 0.8034(3) 0.0450(9) Uani 1 1 d . . . . .
C60 C 0.7962(4) 0.74798(12) 0.7941(5) 0.0593(12) Uani 1 1 d . . . . .
H60A H 0.7585 0.7583 0.8599 0.071 Uiso 1 1 calc R U . . .
C61 C 0.7853(4) 0.76876(11) 0.6933(5) 0.0615(12) Uani 1 1 d . . . . .
H61A H 0.7394 0.7929 0.6893 0.074 Uiso 1 1 calc R U . . .
C62 C 0.8405(4) 0.75471(10) 0.5992(4) 0.0543(11) Uani 1 1 d . . . . .
H62A H 0.8324 0.7693 0.5293 0.065 Uiso 1 1 calc R U . . .
C63 C 0.9087(3) 0.71946(9) 0.6028(3) 0.0392(8) Uani 1 1 d . . . . .
C64 C 0.9667(4) 0.70572(10) 0.4935(4) 0.0498(10) Uani 1 1 d . . . . .
H64A H 1.0126 0.6803 0.5109 0.060 Uiso 1 1 calc R U . . .
C65 C 1.0887(6) 0.73165(14) 0.4603(5) 0.0827(16) Uani 1 1 d . . . . .
H65A H 1.1265 0.7215 0.3914 0.124 Uiso 1 1 calc R U . . .
H65B H 1.1718 0.7333 0.5261 0.124 Uiso 1 1 calc R U . . .
H65C H 1.0463 0.7568 0.4422 0.124 Uiso 1 1 calc R U . . .
C66 C 0.8383(6) 0.70155(14) 0.3911(4) 0.0699(13) Uani 1 1 d . . . . .
H66A H 0.8787 0.6928 0.3215 0.105 Uiso 1 1 calc R U . . .
H66B H 0.7886 0.7260 0.3744 0.105 Uiso 1 1 calc R U . . .
H66C H 0.7651 0.6832 0.4114 0.105 Uiso 1 1 calc R U . . .
C67 C 0.8595(5) 0.68938(13) 0.9150(4) 0.0595(11) Uani 1 1 d . . . . .
H67A H 0.9247 0.6667 0.9116 0.071 Uiso 1 1 calc R U . . .
C68 C 0.9231(7) 0.7121(2) 1.0243(5) 0.103(2) Uani 1 1 d . . . . .
H68A H 1.0266 0.7198 1.0192 0.154 Uiso 1 1 calc R U . . .
H68B H 0.9227 0.6965 1.0944 0.154 Uiso 1 1 calc R U . . .
H68C H 0.8606 0.7345 1.0295 0.154 Uiso 1 1 calc R U . . .
C69 C 0.7020(6) 0.67610(16) 0.9244(5) 0.0908(18) Uani 1 1 d . . . . .
H69A H 0.7048 0.6603 0.9943 0.136 Uiso 1 1 calc R U . . .
H69B H 0.6620 0.6615 0.8544 0.136 Uiso 1 1 calc R U . . .
H69C H 0.6369 0.6979 0.9305 0.136 Uiso 1 1 calc R U . . .
C70 C 0.5501(3) 0.62258(10) 0.6025(3) 0.0365(7) Uani 1 1 d . . . . .
C71 C 0.3178(4) 0.60281(12) 0.5141(4) 0.0530(10) Uani 1 1 d . . . . .
H71A H 0.2431 0.5943 0.5631 0.064 Uiso 1 1 calc R U . . .
H71B H 0.2915 0.5920 0.4344 0.064 Uiso 1 1 calc R U . . .
C72 C 0.3247(4) 0.64508(12) 0.5096(4) 0.0561(11) Uani 1 1 d . . . . .
H72A H 0.3154 0.6542 0.4276 0.067 Uiso 1 1 calc R U . . .
H72B H 0.2441 0.6566 0.5474 0.067 Uiso 1 1 calc R U . . .
C73 C 0.5110(5) 0.55385(13) 0.5899(5) 0.0817(16) Uani 1 1 d . . . . .
H73A H 0.4918 0.5393 0.5169 0.123 Uiso 1 1 calc R U . . .
H73B H 0.4515 0.5434 0.6467 0.123 Uiso 1 1 calc R U . . .
H73C H 0.6184 0.5525 0.6223 0.123 Uiso 1 1 calc R U . . .
C74 C 0.5240(5) 0.69200(12) 0.5938(5) 0.0670(12) Uani 1 1 d . . . . .
H74A H 0.4549 0.7057 0.6367 0.100 Uiso 1 1 calc R U . . .
H74B H 0.5264 0.7043 0.5181 0.100 Uiso 1 1 calc R U . . .
H74C H 0.6255 0.6921 0.6398 0.100 Uiso 1 1 calc R U . . .
C81 C 0.1757(7) 0.6204(3) 0.1421(6) 0.133(3) Uani 1 1 d . . . . .
H81A H 0.1586 0.5976 0.0924 0.160 Uiso 1 1 calc R U . . .
H81B H 0.1786 0.6425 0.0902 0.160 Uiso 1 1 calc R U . . .
C83 C 0.4378(8) 0.6117(3) 0.1649(7) 0.154(4) Uani 1 1 d . . . . .
H83A H 0.4481 0.6331 0.1119 0.184 Uiso 1 1 calc R U . . .
H83B H 0.4237 0.5885 0.1168 0.184 Uiso 1 1 calc R U . . .
C84 C 0.5739(8) 0.6083(4) 0.2500(6) 0.206(6) Uani 1 1 d . . . . .
H84A H 0.6573 0.6001 0.2102 0.310 Uiso 1 1 calc R U . . .
H84B H 0.5582 0.5897 0.3097 0.310 Uiso 1 1 calc R U . . .
H84C H 0.5984 0.6328 0.2874 0.310 Uiso 1 1 calc R U . . .
C82 C 0.0523(8) 0.6247(3) 0.2119(8) 0.153(3) Uani 1 1 d . . . . .
H82A H -0.0447 0.6247 0.1595 0.229 Uiso 1 1 calc R U . . .
H82B H 0.0645 0.6486 0.2550 0.229 Uiso 1 1 calc R U . . .
H82C H 0.0551 0.6038 0.2676 0.229 Uiso 1 1 calc R U . . .
HB H 0.863(4) 0.6192(10) 0.504(3) 0.046(9) Uiso 1 1 d . . . . .
H41A H 1.304(4) 0.5565(10) 0.874(3) 0.039(9) Uiso 1 1 d . . . . .
HA H 0.479(4) 0.4226(10) 0.850(3) 0.049(10) Uiso 1 1 d . . . . .
H5A H 0.170(4) 0.3503(9) 1.173(3) 0.029(8) Uiso 1 1 d . . . . .
H5B H 0.320(5) 0.3690(12) 1.232(4) 0.060(13) Uiso 1 1 d . . . . .
H41B H 1.165(5) 0.5291(13) 0.816(4) 0.058(12) Uiso 1 1 d . . . . .
 
loop_
 _atom_site_aniso_label
 _atom_site_aniso_U_11
 _atom_site_aniso_U_22
 _atom_site_aniso_U_33
 _atom_site_aniso_U_23
 _atom_site_aniso_U_13
 _atom_site_aniso_U_12
Al1 0.0266(4) 0.0355(5) 0.0250(4) 0.0019(4) 0.0074(3) -0.0040(4)
Al2 0.0279(4) 0.0255(4) 0.0367(5) -0.0001(4) -0.0003(3) -0.0033(4)
O1 0.0271(11) 0.0560(16) 0.0435(13) 0.0046(11) 0.0133(9) -0.0066(10)
O2 0.0258(11) 0.0455(13) 0.0603(15) 0.0003(13) -0.0040(10) -0.0038(11)
O3 0.080(2) 0.176(4) 0.083(3) -0.010(3) 0.013(2) 0.013(3)
N1 0.0261(12) 0.0393(14) 0.0227(13) -0.0021(11) 0.0074(10) -0.0024(11)
N2 0.0236(11) 0.0359(15) 0.0260(12) -0.0004(10) 0.0071(9) -0.0039(10)
N3 0.0344(15) 0.070(2) 0.0545(19) 0.0140(17) 0.0226(14) -0.0024(15)
N4 0.0341(15) 0.0569(19) 0.059(2) 0.0103(16) 0.0149(14) -0.0118(14)
N5 0.0265(13) 0.0268(13) 0.0458(16) -0.0009(11) 0.0017(11) -0.0033(10)
N6 0.0239(12) 0.0269(14) 0.0420(15) -0.0007(11) 0.0038(11) -0.0028(10)
N7 0.0326(15) 0.0485(19) 0.070(2) -0.0021(16) -0.0086(15) -0.0047(14)
N8 0.0274(14) 0.0469(18) 0.076(2) -0.0031(16) -0.0013(14) -0.0003(13)
C1 0.0396(18) 0.051(2) 0.0393(19) -0.0062(16) 0.0063(15) -0.0087(16)
C2 0.0258(14) 0.0367(17) 0.0303(16) 0.0011(13) 0.0043(12) 0.0021(12)
C3 0.0222(14) 0.0395(18) 0.0333(17) 0.0009(13) 0.0084(12) -0.0020(12)
C4 0.0251(14) 0.0324(16) 0.0290(15) 0.0059(13) 0.0077(11) 0.0007(12)
C5 0.0338(17) 0.057(2) 0.0294(18) 0.0003(16) 0.0129(14) -0.0134(16)
C6 0.0295(15) 0.0458(19) 0.0291(16) -0.0043(14) 0.0069(12) 0.0021(13)
C7 0.0295(15) 0.0490(19) 0.0257(16) -0.0023(14) 0.0063(12) 0.0026(14)
C8 0.053(2) 0.067(2) 0.0273(17) -0.0033(17) 0.0095(15) 0.0144(19)
C9 0.073(3) 0.082(3) 0.040(2) -0.010(2) 0.019(2) 0.031(2)
C10 0.066(3) 0.064(3) 0.046(2) -0.0060(19) 0.0129(19) 0.027(2)
C11 0.0441(19) 0.047(2) 0.0371(19) -0.0014(16) 0.0086(15) 0.0097(16)
C12 0.062(2) 0.055(3) 0.040(2) 0.0061(18) 0.0105(18) 0.0187(19)
C13 0.109(4) 0.083(4) 0.076(4) 0.026(3) 0.015(3) 0.006(3)
C14 0.068(3) 0.080(3) 0.051(2) 0.006(2) 0.002(2) 0.032(2)
C15 0.0366(16) 0.054(2) 0.0269(15) -0.0009(15) 0.0062(12) 0.0068(15)
C16 0.062(3) 0.057(3) 0.064(3) 0.011(2) 0.013(2) -0.001(2)
C17 0.0401(19) 0.072(3) 0.046(2) 0.0051(19) 0.0012(15) 0.0137(18)
C18 0.0271(14) 0.0382(17) 0.0250(14) 0.0025(13) 0.0078(11) -0.0058(12)
C19 0.0356(16) 0.0407(19) 0.0298(16) -0.0024(14) 0.0098(13) -0.0049(14)
C20 0.049(2) 0.048(2) 0.045(2) -0.0132(17) 0.0036(17) -0.0083(17)
C21 0.050(2) 0.072(3) 0.040(2) -0.015(2) -0.0085(17) -0.007(2)
C22 0.0414(19) 0.061(3) 0.0419(19) -0.0002(18) -0.0047(15) -0.0008(17)
C23 0.0293(15) 0.0477(19) 0.0281(16) 0.0003(14) 0.0046(12) -0.0046(14)
C24 0.0309(16) 0.0431(19) 0.0362(18) 0.0041(15) 0.0044(13) 0.0032(14)
C25 0.043(2) 0.102(4) 0.160(6) -0.056(4) -0.015(3) 0.020(3)
C26 0.111(4) 0.046(3) 0.117(4) 0.011(3) 0.073(4) 0.001(3)
C27 0.0480(19) 0.0351(19) 0.042(2) -0.0020(15) 0.0077(16) 0.0015(15)
C28 0.097(4) 0.046(3) 0.072(3) 0.011(2) 0.025(3) -0.002(2)
C29 0.070(3) 0.066(3) 0.067(3) -0.004(2) 0.021(2) 0.020(2)
C30 0.0238(15) 0.048(2) 0.048(2) 0.0160(16) 0.0107(14) 0.0053(14)
C31 0.0362(19) 0.064(3) 0.073(3) 0.029(2) 0.0295(19) 0.0054(18)
C32 0.0345(19) 0.055(2) 0.090(3) 0.019(2) 0.023(2) -0.0065(17)
C33 0.045(2) 0.105(4) 0.043(2) 0.004(2) 0.0176(17) 0.003(2)
C34 0.051(2) 0.065(3) 0.080(3) -0.011(2) 0.019(2) -0.017(2)
C41 0.037(2) 0.038(2) 0.091(3) 0.008(2) -0.014(2) 0.0000(17)
C42 0.0264(15) 0.0370(18) 0.0437(19) -0.0006(14) 0.0021(14) 0.0005(13)
C43 0.0215(13) 0.0430(17) 0.0450(18) -0.0021(17) 0.0002(12) -0.0038(14)
C44 0.0260(15) 0.0346(17) 0.0418(18) -0.0046(14) 0.0047(13) -0.0058(13)
C45 0.0306(17) 0.046(2) 0.069(3) -0.0081(19) -0.0020(16) -0.0110(15)
C46 0.0264(15) 0.0250(16) 0.056(2) 0.0057(15) -0.0018(14) -0.0005(12)
C47 0.045(2) 0.0348(19) 0.060(2) 0.0129(17) 0.0062(17) -0.0031(15)
C48 0.056(2) 0.044(2) 0.075(3) 0.018(2) 0.006(2) -0.0106(19)
C49 0.048(2) 0.038(2) 0.094(3) 0.018(2) -0.003(2) -0.0138(17)
C50 0.060(3) 0.032(2) 0.084(3) -0.005(2) -0.009(2) -0.0057(18)
C51 0.0414(19) 0.0289(18) 0.064(2) -0.0035(17) 0.0030(17) -0.0028(14)
C52 0.077(3) 0.043(2) 0.076(3) -0.021(2) 0.027(2) -0.014(2)
C53 0.097(4) 0.078(4) 0.141(5) -0.040(4) 0.056(4) -0.003(3)
C54 0.137(5) 0.088(4) 0.069(4) -0.014(3) 0.021(4) -0.034(4)
C55 0.087(3) 0.055(3) 0.057(3) 0.006(2) 0.025(2) -0.017(2)
C56 0.113(4) 0.081(4) 0.087(4) 0.010(3) 0.051(3) 0.010(3)
C57 0.116(5) 0.101(4) 0.063(3) 0.012(3) 0.004(3) -0.028(4)
C58 0.0221(15) 0.0292(17) 0.056(2) -0.0080(15) 0.0040(14) -0.0041(12)
C59 0.0348(17) 0.045(2) 0.056(2) -0.0166(17) 0.0093(16) -0.0065(15)
C60 0.040(2) 0.049(2) 0.090(3) -0.035(2) 0.015(2) 0.0028(17)
C61 0.046(2) 0.030(2) 0.107(4) -0.013(2) 0.006(2) 0.0048(16)
C62 0.040(2) 0.0292(19) 0.092(3) 0.002(2) 0.007(2) 0.0008(15)
C63 0.0264(16) 0.0289(17) 0.062(2) 0.0041(16) 0.0071(15) 0.0001(13)
C64 0.049(2) 0.037(2) 0.068(3) 0.0179(18) 0.0235(19) 0.0088(16)
C65 0.076(3) 0.063(3) 0.120(4) 0.034(3) 0.050(3) 0.002(2)
C66 0.084(3) 0.068(3) 0.057(3) 0.013(2) 0.007(2) 0.019(2)
C67 0.061(2) 0.064(3) 0.056(2) -0.020(2) 0.019(2) -0.005(2)
C68 0.109(5) 0.138(5) 0.062(3) -0.031(3) 0.016(3) -0.040(4)
C69 0.096(4) 0.099(4) 0.087(4) -0.021(3) 0.044(3) -0.041(3)
C70 0.0253(14) 0.0445(19) 0.0396(17) -0.0005(16) 0.0047(12) -0.0042(15)
C71 0.0279(18) 0.066(3) 0.061(2) -0.006(2) -0.0071(16) -0.0053(16)
C72 0.0296(18) 0.067(3) 0.068(3) -0.006(2) -0.0048(17) 0.0044(18)
C73 0.050(3) 0.048(3) 0.137(5) 0.004(3) -0.018(3) -0.011(2)
C74 0.039(2) 0.049(2) 0.110(4) -0.002(2) -0.002(2) 0.0002(17)
C81 0.092(4) 0.212(9) 0.092(5) -0.017(5) 0.000(4) 0.017(6)
C83 0.101(5) 0.269(12) 0.093(5) -0.033(6) 0.024(4) 0.006(6)
C84 0.081(5) 0.45(2) 0.084(5) -0.024(8) 0.011(4) 0.046(8)
C82 0.086(4) 0.210(9) 0.150(7) -0.026(7) -0.018(5) 0.017(6)
 
_geom_special_details
;
 All esds (except the esd in the dihedral angle between two l.s. planes)
 are estimated using the full covariance matrix.  The cell esds are taken
 into account individually in the estimation of esds in distances, angles
 and torsion angles; correlations between esds in cell parameters are only
 used when they are defined by crystal symmetry.  An approximate (isotropic)
 treatment of cell esds is used for estimating esds involving l.s. planes.
;
 
loop_
 _geom_bond_atom_site_label_1
 _geom_bond_atom_site_label_2
 _geom_bond_distance
 _geom_bond_site_symmetry_2
 _geom_bond_publ_flag
Al1 O1 1.810(2) . ?
Al1 N2 1.836(2) . ?
Al1 N1 1.842(3) . ?
Al1 HA 1.58(4) . ?
Al2 O2 1.806(2) . ?
Al2 N5 1.830(3) . ?
Al2 N6 1.838(3) . ?
Al2 HB 1.53(3) . ?
O1 C30 1.277(4) . ?
O2 C70 1.277(3) . ?
O3 C83 1.371(7) . ?
O3 C81 1.413(7) . ?
N1 C2 1.394(4) . ?
N1 C6 1.434(4) . ?
N2 C4 1.400(4) . ?
N2 C18 1.430(4) . ?
N3 C30 1.328(4) . ?
N3 C33 1.446(5) . ?
N3 C31 1.462(5) . ?
N4 C30 1.321(5) . ?
N4 C34 1.435(5) . ?
N4 C32 1.463(4) . ?
N5 C42 1.398(4) . ?
N5 C46 1.440(4) . ?
N6 C44 1.397(4) . ?
N6 C58 1.438(4) . ?
N7 C70 1.327(4) . ?
N7 C73 1.433(6) . ?
N7 C71 1.445(5) . ?
N8 C70 1.311(5) . ?
N8 C74 1.451(5) . ?
N8 C72 1.450(5) . ?
C1 C2 1.464(4) . ?
C1 H1A 0.9800 . ?
C1 H1B 0.9800 . ?
C1 H1C 0.9800 . ?
C2 C3 1.384(4) . ?
C3 C4 1.428(4) . ?
C3 H3A 0.9500 . ?
C4 C5 1.398(4) . ?
C5 H5A 0.93(3) . ?
C5 H5B 0.85(4) . ?
C6 C11 1.403(5) . ?
C6 C7 1.410(5) . ?
C7 C8 1.395(4) . ?
C7 C15 1.515(5) . ?
C8 C9 1.367(5) . ?
C8 H8A 0.9500 . ?
C9 C10 1.363(6) . ?
C9 H9A 0.9500 . ?
C10 C11 1.394(5) . ?
C10 H10A 0.9500 . ?
C11 C12 1.527(5) . ?
C12 C14 1.518(6) . ?
C12 C13 1.544(7) . ?
C12 H12A 1.0000 . ?
C13 H13A 0.9800 . ?
C13 H13B 0.9800 . ?
C13 H13C 0.9800 . ?
C14 H14A 0.9800 . ?
C14 H14B 0.9800 . ?
C14 H14C 0.9800 . ?
C15 C16 1.517(5) . ?
C15 C17 1.535(5) . ?
C15 H15A 1.0000 . ?
C16 H16A 0.9800 . ?
C16 H16B 0.9800 . ?
C16 H16C 0.9800 . ?
C17 H17A 0.9800 . ?
C17 H17B 0.9800 . ?
C17 H17C 0.9800 . ?
C18 C19 1.409(4) . ?
C18 C23 1.414(4) . ?
C19 C20 1.390(5) . ?
C19 C27 1.526(5) . ?
C20 C21 1.373(6) . ?
C20 H20A 0.9500 . ?
C21 C22 1.375(6) . ?
C21 H21A 0.9500 . ?
C22 C23 1.395(5) . ?
C22 H22A 0.9500 . ?
C23 C24 1.521(5) . ?
C24 C26 1.513(5) . ?
C24 C25 1.512(5) . ?
C24 H24A 1.0000 . ?
C25 H25A 0.9800 . ?
C25 H25B 0.9800 . ?
C25 H25C 0.9800 . ?
C26 H26A 0.9800 . ?
C26 H26B 0.9800 . ?
C26 H26C 0.9800 . ?
C27 C29 1.524(5) . ?
C27 C28 1.527(5) . ?
C27 H27A 1.0000 . ?
C28 H28A 0.9800 . ?
C28 H28B 0.9800 . ?
C28 H28C 0.9800 . ?
C29 H29A 0.9800 . ?
C29 H29B 0.9800 . ?
C29 H29C 0.9800 . ?
C31 C32 1.516(6) . ?
C31 H31A 0.9900 . ?
C31 H31B 0.9900 . ?
C32 H32A 0.9900 . ?
C32 H32B 0.9900 . ?
C33 H33A 0.9800 . ?
C33 H33B 0.9800 . ?
C33 H33C 0.9800 . ?
C34 H34A 0.9800 . ?
C34 H34B 0.9800 . ?
C34 H34C 0.9800 . ?
C41 C42 1.391(5) . ?
C41 H41A 1.00(4) . ?
C41 H41B 0.88(4) . ?
C42 C43 1.428(5) . ?
C43 C44 1.380(5) . ?
C43 H43A 0.9500 . ?
C44 C45 1.470(5) . ?
C45 H45A 0.9800 . ?
C45 H45B 0.9800 . ?
C45 H45C 0.9800 . ?
C46 C51 1.391(5) . ?
C46 C47 1.416(5) . ?
C47 C48 1.392(5) . ?
C47 C55 1.515(6) . ?
C48 C49 1.350(6) . ?
C48 H48A 0.9500 . ?
C49 C50 1.379(7) . ?
C49 H49A 0.9500 . ?
C50 C51 1.400(5) . ?
C50 H50A 0.9500 . ?
C51 C52 1.513(6) . ?
C52 C54 1.507(7) . ?
C52 C53 1.553(7) . ?
C52 H52A 1.0000 . ?
C53 H53A 0.9800 . ?
C53 H53B 0.9800 . ?
C53 H53C 0.9800 . ?
C54 H54A 0.9800 . ?
C54 H54B 0.9800 . ?
C54 H54C 0.9800 . ?
C55 C56 1.530(7) . ?
C55 C57 1.545(7) . ?
C55 H55A 1.0000 . ?
C56 H56A 0.9800 . ?
C56 H56B 0.9800 . ?
C56 H56C 0.9800 . ?
C57 H57A 0.9800 . ?
C57 H57B 0.9800 . ?
C57 H57C 0.9800 . ?
C58 C63 1.403(5) . ?
C58 C59 1.411(5) . ?
C59 C60 1.401(5) . ?
C59 C67 1.519(6) . ?
C60 C61 1.368(7) . ?
C60 H60A 0.9500 . ?
C61 C62 1.357(6) . ?
C61 H61A 0.9500 . ?
C62 C63 1.391(5) . ?
C62 H62A 0.9500 . ?
C63 C64 1.517(5) . ?
C64 C66 1.524(6) . ?
C64 C65 1.524(5) . ?
C64 H64A 1.0000 . ?
C65 H65A 0.9800 . ?
C65 H65B 0.9800 . ?
C65 H65C 0.9800 . ?
C66 H66A 0.9800 . ?
C66 H66B 0.9800 . ?
C66 H66C 0.9800 . ?
C67 C69 1.511(6) . ?
C67 C68 1.531(7) . ?
C67 H67A 1.0000 . ?
C68 H68A 0.9800 . ?
C68 H68B 0.9800 . ?
C68 H68C 0.9800 . ?
C69 H69A 0.9800 . ?
C69 H69B 0.9800 . ?
C69 H69C 0.9800 . ?
C71 C72 1.503(6) . ?
C71 H71A 0.9900 . ?
C71 H71B 0.9900 . ?
C72 H72A 0.9900 . ?
C72 H72B 0.9900 . ?
C73 H73A 0.9800 . ?
C73 H73B 0.9800 . ?
C73 H73C 0.9800 . ?
C74 H74A 0.9800 . ?
C74 H74B 0.9800 . ?
C74 H74C 0.9800 . ?
C81 C82 1.475(10) . ?
C81 H81A 0.9900 . ?
C81 H81B 0.9900 . ?
C83 C84 1.449(10) . ?
C83 H83A 0.9900 . ?
C83 H83B 0.9900 . ?
C84 H84A 0.9800 . ?
C84 H84B 0.9800 . ?
C84 H84C 0.9800 . ?
C82 H82A 0.9800 . ?
C82 H82B 0.9800 . ?
C82 H82C 0.9800 . ?
 
loop_
 _geom_angle_atom_site_label_1
 _geom_angle_atom_site_label_2
 _geom_angle_atom_site_label_3
 _geom_angle
 _geom_angle_site_symmetry_1
 _geom_angle_site_symmetry_3
 _geom_angle_publ_flag
O1 Al1 N2 109.06(11) . . ?
O1 Al1 N1 110.12(12) . . ?
N2 Al1 N1 101.31(11) . . ?
O1 Al1 HA 103.3(13) . . ?
N2 Al1 HA 115.9(13) . . ?
N1 Al1 HA 117.2(13) . . ?
O2 Al2 N5 109.89(12) . . ?
O2 Al2 N6 109.72(12) . . ?
N5 Al2 N6 101.81(11) . . ?
O2 Al2 HB 101.8(12) . . ?
N5 Al2 HB 118.4(13) . . ?
N6 Al2 HB 115.2(13) . . ?
C30 O1 Al1 140.7(2) . . ?
C70 O2 Al2 141.0(2) . . ?
C83 O3 C81 114.9(5) . . ?
C2 N1 C6 117.1(3) . . ?
C2 N1 Al1 119.60(19) . . ?
C6 N1 Al1 123.19(19) . . ?
C4 N2 C18 116.0(2) . . ?
C4 N2 Al1 120.37(19) . . ?
C18 N2 Al1 123.49(17) . . ?
C30 N3 C33 126.7(3) . . ?
C30 N3 C31 111.2(3) . . ?
C33 N3 C31 122.0(3) . . ?
C30 N4 C34 126.8(3) . . ?
C30 N4 C32 110.8(3) . . ?
C34 N4 C32 122.2(3) . . ?
C42 N5 C46 117.2(3) . . ?
C42 N5 Al2 122.3(2) . . ?
C46 N5 Al2 120.5(2) . . ?
C44 N6 C58 118.0(2) . . ?
C44 N6 Al2 119.3(2) . . ?
C58 N6 Al2 122.69(19) . . ?
C70 N7 C73 126.6(3) . . ?
C70 N7 C71 111.0(3) . . ?
C73 N7 C71 121.7(3) . . ?
C70 N8 C74 127.3(3) . . ?
C70 N8 C72 111.4(3) . . ?
C74 N8 C72 121.1(3) . . ?
C2 C1 H1A 109.5 . . ?
C2 C1 H1B 109.5 . . ?
H1A C1 H1B 109.5 . . ?
C2 C1 H1C 109.5 . . ?
H1A C1 H1C 109.5 . . ?
H1B C1 H1C 109.5 . . ?
C3 C2 N1 121.7(3) . . ?
C3 C2 C1 119.0(3) . . ?
N1 C2 C1 119.3(3) . . ?
C2 C3 C4 130.7(3) . . ?
C2 C3 H3A 114.7 . . ?
C4 C3 H3A 114.7 . . ?
N2 C4 C5 121.8(3) . . ?
N2 C4 C3 119.1(2) . . ?
C5 C4 C3 119.0(3) . . ?
C4 C5 H5A 116.7(19) . . ?
C4 C5 H5B 120(3) . . ?
H5A C5 H5B 122(3) . . ?
C11 C6 C7 120.1(3) . . ?
C11 C6 N1 119.2(3) . . ?
C7 C6 N1 120.6(3) . . ?
C8 C7 C6 118.1(3) . . ?
C8 C7 C15 119.7(3) . . ?
C6 C7 C15 122.3(3) . . ?
C9 C8 C7 121.6(3) . . ?
C9 C8 H8A 119.2 . . ?
C7 C8 H8A 119.2 . . ?
C10 C9 C8 120.2(3) . . ?
C10 C9 H9A 119.9 . . ?
C8 C9 H9A 119.9 . . ?
C9 C10 C11 121.1(4) . . ?
C9 C10 H10A 119.5 . . ?
C11 C10 H10A 119.5 . . ?
C10 C11 C6 118.9(3) . . ?
C10 C11 C12 118.3(3) . . ?
C6 C11 C12 122.8(3) . . ?
C14 C12 C11 110.6(3) . . ?
C14 C12 C13 110.3(4) . . ?
C11 C12 C13 111.4(4) . . ?
C14 C12 H12A 108.1 . . ?
C11 C12 H12A 108.1 . . ?
C13 C12 H12A 108.1 . . ?
C12 C13 H13A 109.5 . . ?
C12 C13 H13B 109.5 . . ?
H13A C13 H13B 109.5 . . ?
C12 C13 H13C 109.5 . . ?
H13A C13 H13C 109.5 . . ?
H13B C13 H13C 109.5 . . ?
C12 C14 H14A 109.5 . . ?
C12 C14 H14B 109.5 . . ?
H14A C14 H14B 109.5 . . ?
C12 C14 H14C 109.5 . . ?
H14A C14 H14C 109.5 . . ?
H14B C14 H14C 109.5 . . ?
C7 C15 C16 111.9(3) . . ?
C7 C15 C17 111.1(3) . . ?
C16 C15 C17 110.1(3) . . ?
C7 C15 H15A 107.9 . . ?
C16 C15 H15A 107.9 . . ?
C17 C15 H15A 107.9 . . ?
C15 C16 H16A 109.5 . . ?
C15 C16 H16B 109.5 . . ?
H16A C16 H16B 109.5 . . ?
C15 C16 H16C 109.5 . . ?
H16A C16 H16C 109.5 . . ?
H16B C16 H16C 109.5 . . ?
C15 C17 H17A 109.5 . . ?
C15 C17 H17B 109.5 . . ?
H17A C17 H17B 109.5 . . ?
C15 C17 H17C 109.5 . . ?
H17A C17 H17C 109.5 . . ?
H17B C17 H17C 109.5 . . ?
C19 C18 C23 120.2(3) . . ?
C19 C18 N2 120.8(3) . . ?
C23 C18 N2 119.1(3) . . ?
C20 C19 C18 118.9(3) . . ?
C20 C19 C27 119.2(3) . . ?
C18 C19 C27 121.9(3) . . ?
C21 C20 C19 121.0(3) . . ?
C21 C20 H20A 119.5 . . ?
C19 C20 H20A 119.5 . . ?
C22 C21 C20 120.5(3) . . ?
C22 C21 H21A 119.7 . . ?
C20 C21 H21A 119.7 . . ?
C21 C22 C23 121.0(3) . . ?
C21 C22 H22A 119.5 . . ?
C23 C22 H22A 119.5 . . ?
C22 C23 C18 118.5(3) . . ?
C22 C23 C24 120.2(3) . . ?
C18 C23 C24 121.3(3) . . ?
C26 C24 C25 110.2(4) . . ?
C26 C24 C23 113.4(3) . . ?
C25 C24 C23 113.4(3) . . ?
C26 C24 H24A 106.4 . . ?
C25 C24 H24A 106.4 . . ?
C23 C24 H24A 106.4 . . ?
C24 C25 H25A 109.5 . . ?
C24 C25 H25B 109.5 . . ?
H25A C25 H25B 109.5 . . ?
C24 C25 H25C 109.5 . . ?
H25A C25 H25C 109.5 . . ?
H25B C25 H25C 109.5 . . ?
C24 C26 H26A 109.5 . . ?
C24 C26 H26B 109.5 . . ?
H26A C26 H26B 109.5 . . ?
C24 C26 H26C 109.5 . . ?
H26A C26 H26C 109.5 . . ?
H26B C26 H26C 109.5 . . ?
C29 C27 C19 112.2(3) . . ?
C29 C27 C28 111.0(3) . . ?
C19 C27 C28 110.8(3) . . ?
C29 C27 H27A 107.5 . . ?
C19 C27 H27A 107.5 . . ?
C28 C27 H27A 107.5 . . ?
C27 C28 H28A 109.5 . . ?
C27 C28 H28B 109.5 . . ?
H28A C28 H28B 109.5 . . ?
C27 C28 H28C 109.5 . . ?
H28A C28 H28C 109.5 . . ?
H28B C28 H28C 109.5 . . ?
C27 C29 H29A 109.5 . . ?
C27 C29 H29B 109.5 . . ?
H29A C29 H29B 109.5 . . ?
C27 C29 H29C 109.5 . . ?
H29A C29 H29C 109.5 . . ?
H29B C29 H29C 109.5 . . ?
O1 C30 N4 125.0(3) . . ?
O1 C30 N3 123.6(3) . . ?
N4 C30 N3 111.4(3) . . ?
N3 C31 C32 102.8(3) . . ?
N3 C31 H31A 111.2 . . ?
C32 C31 H31A 111.2 . . ?
N3 C31 H31B 111.2 . . ?
C32 C31 H31B 111.2 . . ?
H31A C31 H31B 109.1 . . ?
N4 C32 C31 103.7(3) . . ?
N4 C32 H32A 111.0 . . ?
C31 C32 H32A 111.0 . . ?
N4 C32 H32B 111.0 . . ?
C31 C32 H32B 111.0 . . ?
H32A C32 H32B 109.0 . . ?
N3 C33 H33A 109.5 . . ?
N3 C33 H33B 109.5 . . ?
H33A C33 H33B 109.5 . . ?
N3 C33 H33C 109.5 . . ?
H33A C33 H33C 109.5 . . ?
H33B C33 H33C 109.5 . . ?
N4 C34 H34A 109.5 . . ?
N4 C34 H34B 109.5 . . ?
H34A C34 H34B 109.5 . . ?
N4 C34 H34C 109.5 . . ?
H34A C34 H34C 109.5 . . ?
H34B C34 H34C 109.5 . . ?
C42 C41 H41A 117(2) . . ?
C42 C41 H41B 121(3) . . ?
H41A C41 H41B 122(3) . . ?
C41 C42 N5 122.0(3) . . ?
C41 C42 C43 119.2(3) . . ?
N5 C42 C43 118.8(3) . . ?
C44 C43 C42 130.4(3) . . ?
C44 C43 H43A 114.8 . . ?
C42 C43 H43A 114.8 . . ?
C43 C44 N6 122.7(3) . . ?
C43 C44 C45 119.2(3) . . ?
N6 C44 C45 118.1(3) . . ?
C44 C45 H45A 109.5 . . ?
C44 C45 H45B 109.5 . . ?
H45A C45 H45B 109.5 . . ?
C44 C45 H45C 109.5 . . ?
H45A C45 H45C 109.5 . . ?
H45B C45 H45C 109.5 . . ?
C51 C46 C47 120.1(3) . . ?
C51 C46 N5 120.5(3) . . ?
C47 C46 N5 119.3(3) . . ?
C48 C47 C46 118.8(4) . . ?
C48 C47 C55 118.7(4) . . ?
C46 C47 C55 122.5(3) . . ?
C49 C48 C47 121.6(4) . . ?
C49 C48 H48A 119.2 . . ?
C47 C48 H48A 119.2 . . ?
C48 C49 C50 119.7(4) . . ?
C48 C49 H49A 120.2 . . ?
C50 C49 H49A 120.2 . . ?
C49 C50 C51 121.7(4) . . ?
C49 C50 H50A 119.1 . . ?
C51 C50 H50A 119.1 . . ?
C46 C51 C50 118.1(4) . . ?
C46 C51 C52 122.4(3) . . ?
C50 C51 C52 119.4(4) . . ?
C54 C52 C51 113.2(4) . . ?
C54 C52 C53 111.7(4) . . ?
C51 C52 C53 110.1(4) . . ?
C54 C52 H52A 107.2 . . ?
C51 C52 H52A 107.2 . . ?
C53 C52 H52A 107.2 . . ?
C52 C53 H53A 109.5 . . ?
C52 C53 H53B 109.5 . . ?
H53A C53 H53B 109.5 . . ?
C52 C53 H53C 109.5 . . ?
H53A C53 H53C 109.5 . . ?
H53B C53 H53C 109.5 . . ?
C52 C54 H54A 109.5 . . ?
C52 C54 H54B 109.5 . . ?
H54A C54 H54B 109.5 . . ?
C52 C54 H54C 109.5 . . ?
H54A C54 H54C 109.5 . . ?
H54B C54 H54C 109.5 . . ?
C47 C55 C56 111.8(4) . . ?
C47 C55 C57 111.3(4) . . ?
C56 C55 C57 109.6(4) . . ?
C47 C55 H55A 108.0 . . ?
C56 C55 H55A 108.0 . . ?
C57 C55 H55A 108.0 . . ?
C55 C56 H56A 109.5 . . ?
C55 C56 H56B 109.5 . . ?
H56A C56 H56B 109.5 . . ?
C55 C56 H56C 109.5 . . ?
H56A C56 H56C 109.5 . . ?
H56B C56 H56C 109.5 . . ?
C55 C57 H57A 109.5 . . ?
C55 C57 H57B 109.5 . . ?
H57A C57 H57B 109.5 . . ?
C55 C57 H57C 109.5 . . ?
H57A C57 H57C 109.5 . . ?
H57B C57 H57C 109.5 . . ?
C63 C58 C59 119.6(3) . . ?
C63 C58 N6 120.9(3) . . ?
C59 C58 N6 119.4(3) . . ?
C60 C59 C58 117.8(4) . . ?
C60 C59 C67 119.2(4) . . ?
C58 C59 C67 122.9(3) . . ?
C61 C60 C59 122.0(4) . . ?
C61 C60 H60A 119.0 . . ?
C59 C60 H60A 119.0 . . ?
C62 C61 C60 119.7(4) . . ?
C62 C61 H61A 120.1 . . ?
C60 C61 H61A 120.1 . . ?
C61 C62 C63 121.4(4) . . ?
C61 C62 H62A 119.3 . . ?
C63 C62 H62A 119.3 . . ?
C62 C63 C58 119.4(4) . . ?
C62 C63 C64 118.1(3) . . ?
C58 C63 C64 122.5(3) . . ?
C63 C64 C66 111.1(3) . . ?
C63 C64 C65 111.5(4) . . ?
C66 C64 C65 110.5(4) . . ?
C63 C64 H64A 107.9 . . ?
C66 C64 H64A 107.9 . . ?
C65 C64 H64A 107.9 . . ?
C64 C65 H65A 109.5 . . ?
C64 C65 H65B 109.5 . . ?
H65A C65 H65B 109.5 . . ?
C64 C65 H65C 109.5 . . ?
H65A C65 H65C 109.5 . . ?
H65B C65 H65C 109.5 . . ?
C64 C66 H66A 109.5 . . ?
C64 C66 H66B 109.5 . . ?
H66A C66 H66B 109.5 . . ?
C64 C66 H66C 109.5 . . ?
H66A C66 H66C 109.5 . . ?
H66B C66 H66C 109.5 . . ?
C69 C67 C59 110.9(4) . . ?
C69 C67 C68 109.8(4) . . ?
C59 C67 C68 111.6(4) . . ?
C69 C67 H67A 108.1 . . ?
C59 C67 H67A 108.1 . . ?
C68 C67 H67A 108.1 . . ?
C67 C68 H68A 109.5 . . ?
C67 C68 H68B 109.5 . . ?
H68A C68 H68B 109.5 . . ?
C67 C68 H68C 109.5 . . ?
H68A C68 H68C 109.5 . . ?
H68B C68 H68C 109.5 . . ?
C67 C69 H69A 109.5 . . ?
C67 C69 H69B 109.5 . . ?
H69A C69 H69B 109.5 . . ?
C67 C69 H69C 109.5 . . ?
H69A C69 H69C 109.5 . . ?
H69B C69 H69C 109.5 . . ?
O2 C70 N8 124.8(3) . . ?
O2 C70 N7 124.5(3) . . ?
N8 C70 N7 110.7(3) . . ?
N7 C71 C72 103.3(3) . . ?
N7 C71 H71A 111.1 . . ?
C72 C71 H71A 111.1 . . ?
N7 C71 H71B 111.1 . . ?
C72 C71 H71B 111.1 . . ?
H71A C71 H71B 109.1 . . ?
N8 C72 C71 103.1(3) . . ?
N8 C72 H72A 111.2 . . ?
C71 C72 H72A 111.2 . . ?
N8 C72 H72B 111.2 . . ?
C71 C72 H72B 111.2 . . ?
H72A C72 H72B 109.1 . . ?
N7 C73 H73A 109.5 . . ?
N7 C73 H73B 109.5 . . ?
H73A C73 H73B 109.5 . . ?
N7 C73 H73C 109.5 . . ?
H73A C73 H73C 109.5 . . ?
H73B C73 H73C 109.5 . . ?
N8 C74 H74A 109.5 . . ?
N8 C74 H74B 109.5 . . ?
H74A C74 H74B 109.5 . . ?
N8 C74 H74C 109.5 . . ?
H74A C74 H74C 109.5 . . ?
H74B C74 H74C 109.5 . . ?
O3 C81 C82 109.1(6) . . ?
O3 C81 H81A 109.9 . . ?
C82 C81 H81A 109.9 . . ?
O3 C81 H81B 109.9 . . ?
C82 C81 H81B 109.9 . . ?
H81A C81 H81B 108.3 . . ?
O3 C83 C84 111.2(6) . . ?
O3 C83 H83A 109.4 . . ?
C84 C83 H83A 109.4 . . ?
O3 C83 H83B 109.4 . . ?
C84 C83 H83B 109.4 . . ?
H83A C83 H83B 108.0 . . ?
C83 C84 H84A 109.5 . . ?
C83 C84 H84B 109.5 . . ?
H84A C84 H84B 109.5 . . ?
C83 C84 H84C 109.5 . . ?
H84A C84 H84C 109.5 . . ?
H84B C84 H84C 109.5 . . ?
C81 C82 H82A 109.5 . . ?
C81 C82 H82B 109.5 . . ?
H82A C82 H82B 109.5 . . ?
C81 C82 H82C 109.5 . . ?
H82A C82 H82C 109.5 . . ?
H82B C82 H82C 109.5 . . ?
 
loop_
 _geom_torsion_atom_site_label_1
 _geom_torsion_atom_site_label_2
 _geom_torsion_atom_site_label_3
 _geom_torsion_atom_site_label_4
 _geom_torsion
 _geom_torsion_site_symmetry_1
 _geom_torsion_site_symmetry_2
 _geom_torsion_site_symmetry_3
 _geom_torsion_site_symmetry_4
 _geom_torsion_publ_flag
N2 Al1 O1 C30 -124.9(4) . . . . ?
N1 Al1 O1 C30 124.8(4) . . . . ?
N5 Al2 O2 C70 -126.5(4) . . . . ?
N6 Al2 O2 C70 122.3(4) . . . . ?
O1 Al1 N1 C2 140.1(2) . . . . ?
N2 Al1 N1 C2 24.8(2) . . . . ?
O1 Al1 N1 C6 -36.5(3) . . . . ?
N2 Al1 N1 C6 -151.9(2) . . . . ?
O1 Al1 N2 C4 -144.7(2) . . . . ?
N1 Al1 N2 C4 -28.5(2) . . . . ?
O1 Al1 N2 C18 39.6(3) . . . . ?
N1 Al1 N2 C18 155.7(2) . . . . ?
O2 Al2 N5 C42 -137.4(2) . . . . ?
N6 Al2 N5 C42 -21.1(3) . . . . ?
O2 Al2 N5 C46 44.4(3) . . . . ?
N6 Al2 N5 C46 160.7(2) . . . . ?
O2 Al2 N6 C44 138.2(2) . . . . ?
N5 Al2 N6 C44 21.8(3) . . . . ?
O2 Al2 N6 C58 -41.8(3) . . . . ?
N5 Al2 N6 C58 -158.2(2) . . . . ?
C6 N1 C2 C3 166.9(3) . . . . ?
Al1 N1 C2 C3 -10.0(4) . . . . ?
C6 N1 C2 C1 -14.5(4) . . . . ?
Al1 N1 C2 C1 168.6(2) . . . . ?
N1 C2 C3 C4 -9.2(5) . . . . ?
C1 C2 C3 C4 172.2(3) . . . . ?
C18 N2 C4 C5 13.1(4) . . . . ?
Al1 N2 C4 C5 -163.0(3) . . . . ?
C18 N2 C4 C3 -166.7(3) . . . . ?
Al1 N2 C4 C3 17.2(4) . . . . ?
C2 C3 C4 N2 5.2(5) . . . . ?
C2 C3 C4 C5 -174.6(3) . . . . ?
C2 N1 C6 C11 -79.8(4) . . . . ?
Al1 N1 C6 C11 96.9(3) . . . . ?
C2 N1 C6 C7 102.9(4) . . . . ?
Al1 N1 C6 C7 -80.3(3) . . . . ?
C11 C6 C7 C8 -1.6(5) . . . . ?
N1 C6 C7 C8 175.6(3) . . . . ?
C11 C6 C7 C15 177.5(3) . . . . ?
N1 C6 C7 C15 -5.2(5) . . . . ?
C6 C7 C8 C9 1.5(6) . . . . ?
C15 C7 C8 C9 -177.7(4) . . . . ?
C7 C8 C9 C10 0.3(7) . . . . ?
C8 C9 C10 C11 -2.0(7) . . . . ?
C9 C10 C11 C6 1.8(6) . . . . ?
C9 C10 C11 C12 -176.4(4) . . . . ?
C7 C6 C11 C10 0.0(5) . . . . ?
N1 C6 C11 C10 -177.2(3) . . . . ?
C7 C6 C11 C12 178.2(3) . . . . ?
N1 C6 C11 C12 0.9(5) . . . . ?
C10 C11 C12 C14 64.2(5) . . . . ?
C6 C11 C12 C14 -114.0(4) . . . . ?
C10 C11 C12 C13 -58.9(5) . . . . ?
C6 C11 C12 C13 122.9(4) . . . . ?
C8 C7 C15 C16 -60.8(4) . . . . ?
C6 C7 C15 C16 120.0(4) . . . . ?
C8 C7 C15 C17 62.7(4) . . . . ?
C6 C7 C15 C17 -116.5(3) . . . . ?
C4 N2 C18 C19 -87.0(3) . . . . ?
Al1 N2 C18 C19 89.0(3) . . . . ?
C4 N2 C18 C23 95.1(3) . . . . ?
Al1 N2 C18 C23 -88.9(3) . . . . ?
C23 C18 C19 C20 -0.4(4) . . . . ?
N2 C18 C19 C20 -178.3(3) . . . . ?
C23 C18 C19 C27 178.6(3) . . . . ?
N2 C18 C19 C27 0.7(4) . . . . ?
C18 C19 C20 C21 -0.4(5) . . . . ?
C27 C19 C20 C21 -179.5(3) . . . . ?
C19 C20 C21 C22 0.0(6) . . . . ?
C20 C21 C22 C23 1.2(6) . . . . ?
C21 C22 C23 C18 -1.9(5) . . . . ?
C21 C22 C23 C24 177.1(3) . . . . ?
C19 C18 C23 C22 1.6(4) . . . . ?
N2 C18 C23 C22 179.5(3) . . . . ?
C19 C18 C23 C24 -177.5(3) . . . . ?
N2 C18 C23 C24 0.5(4) . . . . ?
C22 C23 C24 C26 97.0(4) . . . . ?
C18 C23 C24 C26 -84.0(4) . . . . ?
C22 C23 C24 C25 -29.7(5) . . . . ?
C18 C23 C24 C25 149.3(4) . . . . ?
C20 C19 C27 C29 -53.5(4) . . . . ?
C18 C19 C27 C29 127.4(3) . . . . ?
C20 C19 C27 C28 71.1(4) . . . . ?
C18 C19 C27 C28 -107.9(4) . . . . ?
Al1 O1 C30 N4 87.3(5) . . . . ?
Al1 O1 C30 N3 -95.4(4) . . . . ?
C34 N4 C30 O1 1.8(6) . . . . ?
C32 N4 C30 O1 177.3(3) . . . . ?
C34 N4 C30 N3 -175.8(4) . . . . ?
C32 N4 C30 N3 -0.3(4) . . . . ?
C33 N3 C30 O1 1.3(6) . . . . ?
C31 N3 C30 O1 -175.8(3) . . . . ?
C33 N3 C30 N4 179.0(4) . . . . ?
C31 N3 C30 N4 1.9(4) . . . . ?
C30 N3 C31 C32 -2.6(4) . . . . ?
C33 N3 C31 C32 -179.8(4) . . . . ?
C30 N4 C32 C31 -1.3(4) . . . . ?
C34 N4 C32 C31 174.5(4) . . . . ?
N3 C31 C32 N4 2.2(4) . . . . ?
C46 N5 C42 C41 9.3(5) . . . . ?
Al2 N5 C42 C41 -169.0(3) . . . . ?
C46 N5 C42 C43 -172.1(3) . . . . ?
Al2 N5 C42 C43 9.7(4) . . . . ?
C41 C42 C43 C44 -174.4(4) . . . . ?
N5 C42 C43 C44 6.9(5) . . . . ?
C42 C43 C44 N6 -5.5(5) . . . . ?
C42 C43 C44 C45 175.0(4) . . . . ?
C58 N6 C44 C43 168.1(3) . . . . ?
Al2 N6 C44 C43 -11.9(4) . . . . ?
C58 N6 C44 C45 -12.5(4) . . . . ?
Al2 N6 C44 C45 167.5(2) . . . . ?
C42 N5 C46 C51 -99.6(4) . . . . ?
Al2 N5 C46 C51 78.6(3) . . . . ?
C42 N5 C46 C47 84.3(4) . . . . ?
Al2 N5 C46 C47 -97.4(3) . . . . ?
C51 C46 C47 C48 -2.6(5) . . . . ?
N5 C46 C47 C48 173.5(3) . . . . ?
C51 C46 C47 C55 179.3(4) . . . . ?
N5 C46 C47 C55 -4.6(5) . . . . ?
C46 C47 C48 C49 0.1(6) . . . . ?
C55 C47 C48 C49 178.3(4) . . . . ?
C47 C48 C49 C50 1.5(6) . . . . ?
C48 C49 C50 C51 -0.8(6) . . . . ?
C47 C46 C51 C50 3.2(5) . . . . ?
N5 C46 C51 C50 -172.8(3) . . . . ?
C47 C46 C51 C52 -175.9(4) . . . . ?
N5 C46 C51 C52 8.1(5) . . . . ?
C49 C50 C51 C46 -1.6(6) . . . . ?
C49 C50 C51 C52 177.5(4) . . . . ?
C46 C51 C52 C54 -120.8(4) . . . . ?
C50 C51 C52 C54 60.1(5) . . . . ?
C46 C51 C52 C53 113.4(4) . . . . ?
C50 C51 C52 C53 -65.7(5) . . . . ?
C48 C47 C55 C56 -60.9(5) . . . . ?
C46 C47 C55 C56 117.2(4) . . . . ?
C48 C47 C55 C57 61.9(5) . . . . ?
C46 C47 C55 C57 -119.9(4) . . . . ?
C44 N6 C58 C63 105.1(4) . . . . ?
Al2 N6 C58 C63 -74.9(3) . . . . ?
C44 N6 C58 C59 -77.6(4) . . . . ?
Al2 N6 C58 C59 102.4(3) . . . . ?
C63 C58 C59 C60 -0.3(5) . . . . ?
N6 C58 C59 C60 -177.7(3) . . . . ?
C63 C58 C59 C67 176.5(3) . . . . ?
N6 C58 C59 C67 -0.9(5) . . . . ?
C58 C59 C60 C61 1.2(5) . . . . ?
C67 C59 C60 C61 -175.7(4) . . . . ?
C59 C60 C61 C62 -0.9(6) . . . . ?
C60 C61 C62 C63 -0.2(6) . . . . ?
C61 C62 C63 C58 1.0(5) . . . . ?
C61 C62 C63 C64 179.7(3) . . . . ?
C59 C58 C63 C62 -0.8(5) . . . . ?
N6 C58 C63 C62 176.6(3) . . . . ?
C59 C58 C63 C64 -179.3(3) . . . . ?
N6 C58 C63 C64 -2.0(5) . . . . ?
C62 C63 C64 C66 -62.4(4) . . . . ?
C58 C63 C64 C66 116.2(4) . . . . ?
C62 C63 C64 C65 61.4(4) . . . . ?
C58 C63 C64 C65 -120.0(4) . . . . ?
C60 C59 C67 C69 70.8(5) . . . . ?
C58 C59 C67 C69 -105.9(4) . . . . ?
C60 C59 C67 C68 -52.0(5) . . . . ?
C58 C59 C67 C68 131.3(4) . . . . ?
Al2 O2 C70 N8 -94.5(5) . . . . ?
Al2 O2 C70 N7 87.9(5) . . . . ?
C74 N8 C70 O2 5.3(6) . . . . ?
C72 N8 C70 O2 -179.7(3) . . . . ?
C74 N8 C70 N7 -176.9(4) . . . . ?
C72 N8 C70 N7 -1.8(4) . . . . ?
C73 N7 C70 O2 3.8(6) . . . . ?
C71 N7 C70 O2 174.1(3) . . . . ?
C73 N7 C70 N8 -174.1(4) . . . . ?
C71 N7 C70 N8 -3.7(4) . . . . ?
C70 N7 C71 C72 7.3(5) . . . . ?
C73 N7 C71 C72 178.2(4) . . . . ?
C70 N8 C72 C71 6.1(4) . . . . ?
C74 N8 C72 C71 -178.4(4) . . . . ?
N7 C71 C72 N8 -7.7(4) . . . . ?
C83 O3 C81 C82 177.9(8) . . . . ?
C81 O3 C83 C84 -179.4(10) . . . . ?
 
_refine_diff_density_max    0.257
_refine_diff_density_min   -0.234
_refine_diff_density_rms    0.041

_shelx_res_file
;

    shelx.res created by SHELXL-2014/7

TITL gn207 in P2(1)
CELL  0.71073   8.9776  35.4964  11.5348   90.000   98.931   90.000
ZERR     2.00   0.0018   0.0070   0.0023    0.000    0.002    0.000
LATT  -1
SYMM  - X, 1/2 + Y, - Z
SFAC  C    H    N    O    AL
UNIT  144 224 16 6 4
MERG   2
OMIT    -3.00 180.00
OMIT    -1   0   2
FMAP   2
PLAN    5
SIZE     0.300   0.400   0.500
ACTA
BOND   $H
CONF
L.S.  20
TEMP   -73.10
WGHT    0.071900    0.037400
FVAR       0.44522
AL1   5    0.504656    0.381609    0.901726    11.00000    0.02665    0.03554 =
         0.02502    0.00194    0.00741   -0.00400
AL2   5    0.878169    0.619756    0.637965    11.00000    0.02786    0.02551 =
         0.03668   -0.00009   -0.00034   -0.00325
O1    4    0.704883    0.374181    0.905633    11.00000    0.02707    0.05604 =
         0.04353    0.00463    0.01329   -0.00657
O2    4    0.683533    0.621597    0.660155    11.00000    0.02581    0.04549 =
         0.06028    0.00033   -0.00404   -0.00379
O3    4    0.313902    0.617176    0.219006    11.00000    0.08006    0.17616 =
         0.08304   -0.01037    0.01340    0.01314
N1    3    0.397226    0.343126    0.820479    11.00000    0.02612    0.03930 =
         0.02273   -0.00213    0.00739   -0.00238
N2    3    0.457942    0.374657    1.049646    11.00000    0.02364    0.03589 =
         0.02597   -0.00035    0.00714   -0.00391
N3    3    0.873060    0.385758    0.778823    11.00000    0.03444    0.06968 =
         0.05448    0.01396    0.02256   -0.00235
N4    3    0.908956    0.413880    0.949655    11.00000    0.03414    0.05689 =
         0.05851    0.01028    0.01487   -0.01175
N5    3    0.973685    0.580223    0.720082    11.00000    0.02646    0.02675 =
         0.04579   -0.00095    0.00169   -0.00329
N6    3    0.981104    0.660318    0.709889    11.00000    0.02388    0.02688 =
         0.04201   -0.00072    0.00376   -0.00281
N7    3    0.469051    0.592373    0.566160    11.00000    0.03265    0.04846 =
         0.07049   -0.00212   -0.00858   -0.00473
N8    3    0.472593    0.653444    0.574452    11.00000    0.02738    0.04686 =
         0.07609   -0.00308   -0.00130   -0.00026
C1    1    0.169724    0.303221    0.785438    11.00000    0.03957    0.05139 =
         0.03935   -0.00620    0.00628   -0.00867
AFIX 137
H1A   2    0.142901    0.314593    0.707577    11.00000   -1.50000
H1B   2    0.078046    0.298969    0.819950    11.00000   -1.50000
H1C   2    0.220770    0.279125    0.778227    11.00000   -1.50000
AFIX   0
C2    1    0.270518    0.328590    0.860989    11.00000    0.02576    0.03673 =
         0.03027    0.00105    0.00429    0.00209
C3    1    0.235541    0.338124    0.969912    11.00000    0.02215    0.03951 =
         0.03334    0.00093    0.00841   -0.00204
AFIX  43
H3A   2    0.139346    0.329770    0.983820    11.00000   -1.20000
AFIX   0
C4    1    0.320132    0.358443    1.064855    11.00000    0.02513    0.03236 =
         0.02900    0.00591    0.00766    0.00067
C5    1    0.263150    0.361508    1.170577    11.00000    0.03381    0.05737 =
         0.02943    0.00027    0.01290   -0.01339
C6    1    0.441557    0.325548    0.719166    11.00000    0.02946    0.04578 =
         0.02905   -0.00432    0.00686    0.00215
C7    1    0.409531    0.342774    0.607888    11.00000    0.02947    0.04901 =
         0.02572   -0.00233    0.00633    0.00264
C8    1    0.464593    0.325705    0.514138    11.00000    0.05340    0.06713 =
         0.02731   -0.00332    0.00946    0.01444
AFIX  43
H8A   2    0.446121    0.337246    0.438967    11.00000   -1.20000
AFIX   0
C9    1    0.544431    0.292801    0.527748    11.00000    0.07278    0.08236 =
         0.03980   -0.00995    0.01865    0.03105
AFIX  43
H9A   2    0.581071    0.281849    0.462508    11.00000   -1.20000
AFIX   0
C10   1    0.571626    0.275657    0.634674    11.00000    0.06564    0.06409 =
         0.04589   -0.00599    0.01286    0.02658
AFIX  43
H10A  2    0.624431    0.252377    0.642572    11.00000   -1.20000
AFIX   0
C11   1    0.523232    0.291721    0.732635    11.00000    0.04412    0.04675 =
         0.03714   -0.00144    0.00859    0.00972
C12   1    0.565690    0.272193    0.851163    11.00000    0.06198    0.05516 =
         0.04016    0.00612    0.01045    0.01865
AFIX  13
H12A  2    0.518924    0.286577    0.910810    11.00000   -1.20000
AFIX   0
C13   1    0.505081    0.231444    0.847916    11.00000    0.10913    0.08336 =
         0.07565    0.02631    0.01537    0.00638
AFIX 137
H13A  2    0.394924    0.231780    0.827998    11.00000   -1.50000
H13B  2    0.533984    0.219716    0.925041    11.00000   -1.50000
H13C  2    0.547861    0.216969    0.788648    11.00000   -1.50000
AFIX   0
C14   1    0.735422    0.272478    0.888595    11.00000    0.06767    0.07951 =
         0.05148    0.00592    0.00206    0.03210
AFIX 137
H14A  2    0.759947    0.262119    0.968020    11.00000   -1.50000
H14B  2    0.772757    0.298406    0.887826    11.00000   -1.50000
H14C  2    0.783141    0.257094    0.834105    11.00000   -1.50000
AFIX   0
C15   1    0.316608    0.378466    0.587423    11.00000    0.03657    0.05410 =
         0.02694   -0.00088    0.00622    0.00682
AFIX  13
H15A  2    0.288942    0.386500    0.664406    11.00000   -1.20000
AFIX   0
C16   1    0.404693    0.410316    0.542284    11.00000    0.06219    0.05729 =
         0.06422    0.01127    0.01294   -0.00056
AFIX 137
H16A  2    0.344244    0.433420    0.536690    11.00000   -1.50000
H16B  2    0.427968    0.403750    0.464537    11.00000   -1.50000
H16C  2    0.498758    0.414348    0.596471    11.00000   -1.50000
AFIX   0
C17   1    0.169900    0.371425    0.502425    11.00000    0.04012    0.07222 =
         0.04615    0.00511    0.00117    0.01365
AFIX 137
H17A  2    0.108433    0.394367    0.495463    11.00000   -1.50000
H17B  2    0.113711    0.350874    0.532411    11.00000   -1.50000
H17C  2    0.193918    0.364538    0.425152    11.00000   -1.50000
AFIX   0
C18   1    0.551642    0.387232    1.154092    11.00000    0.02713    0.03822 =
         0.02504    0.00247    0.00784   -0.00583
C19   1    0.534600    0.423659    1.198692    11.00000    0.03563    0.04070 =
         0.02982   -0.00241    0.00982   -0.00488
C20   1    0.630691    0.435098    1.298759    11.00000    0.04893    0.04840 =
         0.04465   -0.01324    0.00362   -0.00832
AFIX  43
H20A  2    0.620495    0.459663    1.329262    11.00000   -1.20000
AFIX   0
C21   1    0.740143    0.411415    1.354180    11.00000    0.04991    0.07156 =
         0.04033   -0.01468   -0.00849   -0.00738
AFIX  43
H21A  2    0.804743    0.419745    1.422475    11.00000   -1.20000
AFIX   0
C22   1    0.756974    0.375735    1.311597    11.00000    0.04143    0.06061 =
         0.04192   -0.00020   -0.00473   -0.00078
AFIX  43
H22A  2    0.831963    0.359516    1.351766    11.00000   -1.20000
AFIX   0
C23   1    0.665562    0.363017    1.210307    11.00000    0.02933    0.04771 =
         0.02811    0.00033    0.00459   -0.00459
C24   1    0.690744    0.324165    1.161276    11.00000    0.03087    0.04314 =
         0.03623    0.00407    0.00438    0.00318
AFIX  13
H24A  2    0.665347    0.326276    1.073991    11.00000   -1.20000
AFIX   0
C25   1    0.853026    0.311232    1.187037    11.00000    0.04331    0.10212 =
         0.15969   -0.05615   -0.01460    0.01951
AFIX 137
H25A  2    0.918510    0.330487    1.160715    11.00000   -1.50000
H25B  2    0.864289    0.287580    1.145437    11.00000   -1.50000
H25C  2    0.881436    0.307247    1.271654    11.00000   -1.50000
AFIX   0
C26   1    0.587468    0.294302    1.198285    11.00000    0.11081    0.04586 =
         0.11660    0.01089    0.07335    0.00060
AFIX 137
H26A  2    0.608756    0.270060    1.163637    11.00000   -1.50000
H26B  2    0.482290    0.301353    1.171167    11.00000   -1.50000
H26C  2    0.604456    0.292145    1.284025    11.00000   -1.50000
AFIX   0
C27   1    0.415429    0.451011    1.139266    11.00000    0.04803    0.03513 =
         0.04151   -0.00198    0.00773    0.00149
AFIX  13
H27A  2    0.348200    0.436701    1.077247    11.00000   -1.20000
AFIX   0
C28   1    0.488322    0.482778    1.078605    11.00000    0.09696    0.04614 =
         0.07160    0.01095    0.02502   -0.00171
AFIX 137
H28A  2    0.544056    0.472107    1.019737    11.00000   -1.50000
H28B  2    0.557825    0.496819    1.136957    11.00000   -1.50000
H28C  2    0.409870    0.499795    1.040188    11.00000   -1.50000
AFIX   0
C29   1    0.317198    0.466665    1.224504    11.00000    0.06971    0.06594 =
         0.06690   -0.00392    0.02115    0.02026
AFIX 137
H29A  2    0.238648    0.482828    1.181896    11.00000   -1.50000
H29B  2    0.379669    0.481437    1.285388    11.00000   -1.50000
H29C  2    0.270109    0.445796    1.261042    11.00000   -1.50000
AFIX   0
C30   1    0.821467    0.390798    0.879534    11.00000    0.02380    0.04784 =
         0.04784    0.01596    0.01066    0.00534
C31   1    1.013961    0.406282    0.777438    11.00000    0.03622    0.06387 =
         0.07337    0.02902    0.02946    0.00544
AFIX  23
H31A  2    1.004640    0.424362    0.711356    11.00000   -1.20000
H31B  2    1.098408    0.388806    0.771566    11.00000   -1.20000
AFIX   0
C32   1    1.036348    0.426575    0.894545    11.00000    0.03450    0.05497 =
         0.08964    0.01856    0.02334   -0.00655
AFIX  23
H32A  2    1.133467    0.419431    0.942434    11.00000   -1.20000
H32B  2    1.033947    0.454237    0.883454    11.00000   -1.20000
AFIX   0
C33   1    0.807773    0.361994    0.682377    11.00000    0.04534    0.10459 =
         0.04311    0.00416    0.01759    0.00343
AFIX 137
H33A  2    0.880547    0.342527    0.668842    11.00000   -1.50000
H33B  2    0.782261    0.377315    0.611394    11.00000   -1.50000
H33C  2    0.716258    0.350031    0.701520    11.00000   -1.50000
AFIX   0
C34   1    0.893459    0.423909    1.067751    11.00000    0.05103    0.06516 =
         0.07984   -0.01053    0.01918   -0.01699
AFIX 137
H34A  2    0.895178    0.451399    1.075704    11.00000   -1.50000
H34B  2    0.977003    0.413020    1.122223    11.00000   -1.50000
H34C  2    0.797616    0.414154    1.085951    11.00000   -1.50000
AFIX   0
C41   1    1.200630    0.551980    0.829341    11.00000    0.03731    0.03759 =
         0.09066    0.00751   -0.01446    0.00002
C42   1    1.118906    0.583346    0.783704    11.00000    0.02645    0.03705 =
         0.04368   -0.00058    0.00209    0.00052
C43   1    1.186084    0.619820    0.800004    11.00000    0.02148    0.04296 =
         0.04497   -0.00211    0.00020   -0.00383
AFIX  43
H43A  2    1.288728    0.619834    0.835959    11.00000   -1.20000
AFIX   0
C44   1    1.126042    0.655032    0.771987    11.00000    0.02599    0.03465 =
         0.04179   -0.00456    0.00474   -0.00577
C45   1    1.217689    0.688595    0.807559    11.00000    0.03058    0.04611 =
         0.06862   -0.00812   -0.00195   -0.01097
AFIX 137
H45A  2    1.218966    0.704997    0.739378    11.00000   -1.50000
H45B  2    1.320935    0.680895    0.838883    11.00000   -1.50000
H45C  2    1.174280    0.702273    0.868136    11.00000   -1.50000
AFIX   0
C46   1    0.901978    0.543885    0.718483    11.00000    0.02641    0.02498 =
         0.05618    0.00566   -0.00180   -0.00046
C47   1    0.824919    0.533704    0.812026    11.00000    0.04485    0.03479 =
         0.05957    0.01286    0.00619   -0.00310
C48   1    0.743117    0.500228    0.803837    11.00000    0.05567    0.04417 =
         0.07491    0.01804    0.00648   -0.01057
AFIX  43
H48A  2    0.690957    0.493245    0.866186    11.00000   -1.20000
AFIX   0
C49   1    0.736162    0.477461    0.709415    11.00000    0.04764    0.03816 =
         0.09381    0.01769   -0.00285   -0.01378
AFIX  43
H49A  2    0.677710    0.455048    0.704818    11.00000   -1.20000
AFIX   0
C50   1    0.814299    0.486891    0.619670    11.00000    0.06034    0.03215 =
         0.08407   -0.00547   -0.00894   -0.00570
AFIX  43
H50A  2    0.809778    0.470557    0.553975    11.00000   -1.20000
AFIX   0
C51   1    0.900117    0.519907    0.622843    11.00000    0.04137    0.02894 =
         0.06381   -0.00353    0.00297   -0.00280
C52   1    0.988708    0.528042    0.524259    11.00000    0.07722    0.04307 =
         0.07551   -0.02073    0.02652   -0.01415
AFIX  13
H52A  2    1.038762    0.553036    0.541204    11.00000   -1.20000
AFIX   0
C53   1    1.115695    0.498331    0.523991    11.00000    0.09719    0.07782 =
         0.14080   -0.04050    0.05619   -0.00343
AFIX 137
H53A  2    1.175551    0.496792    0.602482    11.00000   -1.50000
H53B  2    1.180934    0.505769    0.467234    11.00000   -1.50000
H53C  2    1.070713    0.473688    0.502086    11.00000   -1.50000
AFIX   0
C54   1    0.891149    0.531026    0.405937    11.00000    0.13737    0.08821 =
         0.06940   -0.01434    0.02130   -0.03379
AFIX 137
H54A  2    0.954538    0.536370    0.345976    11.00000   -1.50000
H54B  2    0.817975    0.551441    0.407404    11.00000   -1.50000
H54C  2    0.837475    0.507210    0.387468    11.00000   -1.50000
AFIX   0
C55   1    0.824223    0.558407    0.919063    11.00000    0.08718    0.05508 =
         0.05722    0.00607    0.02505   -0.01733
AFIX  13
H55A  2    0.887500    0.581104    0.910263    11.00000   -1.20000
AFIX   0
C56   1    0.665167    0.571867    0.930241    11.00000    0.11330    0.08149 =
         0.08725    0.00955    0.05117    0.00991
AFIX 137
H56A  2    0.670218    0.589507    0.996092    11.00000   -1.50000
H56B  2    0.602770    0.550180    0.944209    11.00000   -1.50000
H56C  2    0.620637    0.584534    0.857582    11.00000   -1.50000
AFIX   0
C57   1    0.893383    0.537708    1.032526    11.00000    0.11560    0.10117 =
         0.06279    0.01174    0.00408   -0.02845
AFIX 137
H57A  2    0.904519    0.555381    1.098581    11.00000   -1.50000
H57B  2    0.992504    0.527646    1.023262    11.00000   -1.50000
H57C  2    0.827004    0.516966    1.047723    11.00000   -1.50000
AFIX   0
C58   1    0.918691    0.697689    0.705162    11.00000    0.02208    0.02924 =
         0.05556   -0.00796    0.00395   -0.00409
C59   1    0.861065    0.712007    0.803380    11.00000    0.03477    0.04478 =
         0.05610   -0.01658    0.00934   -0.00647
C60   1    0.796165    0.747977    0.794130    11.00000    0.04002    0.04888 =
         0.09037   -0.03468    0.01488    0.00280
AFIX  43
H60A  2    0.758500    0.758252    0.859896    11.00000   -1.20000
AFIX   0
C61   1    0.785346    0.768764    0.693328    11.00000    0.04560    0.02997 =
         0.10702   -0.01274    0.00617    0.00481
AFIX  43
H61A  2    0.739408    0.792936    0.689268    11.00000   -1.20000
AFIX   0
C62   1    0.840506    0.754712    0.599154    11.00000    0.04012    0.02925 =
         0.09248    0.00212    0.00660    0.00082
AFIX  43
H62A  2    0.832351    0.769250    0.529305    11.00000   -1.20000
AFIX   0
C63   1    0.908742    0.719464    0.602763    11.00000    0.02640    0.02886 =
         0.06248    0.00405    0.00707    0.00011
C64   1    0.966728    0.705716    0.493455    11.00000    0.04886    0.03688 =
         0.06825    0.01795    0.02352    0.00877
AFIX  13
H64A  2    1.012584    0.680272    0.510919    11.00000   -1.20000
AFIX   0
C65   1    1.088726    0.731653    0.460346    11.00000    0.07578    0.06296 =
         0.12037    0.03353    0.05019    0.00233
AFIX 137
H65A  2    1.126454    0.721495    0.391422    11.00000   -1.50000
H65B  2    1.171833    0.733346    0.526138    11.00000   -1.50000
H65C  2    1.046336    0.756795    0.442188    11.00000   -1.50000
AFIX   0
C66   1    0.838326    0.701550    0.391053    11.00000    0.08362    0.06783 =
         0.05702    0.01268    0.00674    0.01884
AFIX 137
H66A  2    0.878715    0.692838    0.321535    11.00000   -1.50000
H66B  2    0.788579    0.725956    0.374353    11.00000   -1.50000
H66C  2    0.765126    0.683177    0.411430    11.00000   -1.50000
AFIX   0
C67   1    0.859530    0.689375    0.914969    11.00000    0.06094    0.06446 =
         0.05629   -0.02011    0.01915   -0.00472
AFIX  13
H67A  2    0.924661    0.666671    0.911601    11.00000   -1.20000
AFIX   0
C68   1    0.923081    0.712081    1.024333    11.00000    0.10924    0.13793 =
         0.06237   -0.03105    0.01643   -0.04008
AFIX 137
H68A  2    1.026637    0.719818    1.019184    11.00000   -1.50000
H68B  2    0.922670    0.696481    1.094380    11.00000   -1.50000
H68C  2    0.860624    0.734481    1.029453    11.00000   -1.50000
AFIX   0
C69   1    0.701988    0.676099    0.924353    11.00000    0.09579    0.09888 =
         0.08725   -0.02128    0.04436   -0.04121
AFIX 137
H69A  2    0.704765    0.660271    0.994268    11.00000   -1.50000
H69B  2    0.662038    0.661464    0.854361    11.00000   -1.50000
H69C  2    0.636950    0.697949    0.930518    11.00000   -1.50000
AFIX   0
C70   1    0.550122    0.622583    0.602477    11.00000    0.02534    0.04448 =
         0.03964   -0.00054    0.00466   -0.00420
C71   1    0.317828    0.602810    0.514070    11.00000    0.02787    0.06594 =
         0.06064   -0.00586   -0.00706   -0.00525
AFIX  23
H71A  2    0.243098    0.594283    0.563148    11.00000   -1.20000
H71B  2    0.291479    0.591996    0.434411    11.00000   -1.20000
AFIX   0
C72   1    0.324720    0.645082    0.509565    11.00000    0.02964    0.06666 =
         0.06802   -0.00617   -0.00482    0.00441
AFIX  23
H72A  2    0.315412    0.654181    0.427625    11.00000   -1.20000
H72B  2    0.244129    0.656619    0.547434    11.00000   -1.20000
AFIX   0
C73   1    0.510992    0.553849    0.589869    11.00000    0.05006    0.04779 =
         0.13688    0.00419   -0.01842   -0.01078
AFIX 137
H73A  2    0.491767    0.539286    0.516897    11.00000   -1.50000
H73B  2    0.451451    0.543426    0.646657    11.00000   -1.50000
H73C  2    0.618432    0.552497    0.622265    11.00000   -1.50000
AFIX   0
C74   1    0.524033    0.692003    0.593816    11.00000    0.03859    0.04867 =
         0.10953   -0.00218   -0.00153    0.00024
AFIX 137
H74A  2    0.454927    0.705666    0.636722    11.00000   -1.50000
H74B  2    0.526443    0.704295    0.518055    11.00000   -1.50000
H74C  2    0.625479    0.692096    0.639754    11.00000   -1.50000
AFIX   0
C81   1    0.175676    0.620374    0.142143    11.00000    0.09182    0.21191 =
         0.09203   -0.01660   -0.00022    0.01682
AFIX  23
H81A  2    0.158560    0.597570    0.092443    11.00000   -1.20000
H81B  2    0.178639    0.642475    0.090201    11.00000   -1.20000
AFIX   0
C83   1    0.437752    0.611662    0.164904    11.00000    0.10146    0.26940 =
         0.09326   -0.03345    0.02417    0.00643
AFIX  23
H83A  2    0.448063    0.633108    0.111852    11.00000   -1.20000
H83B  2    0.423669    0.588467    0.116793    11.00000   -1.20000
AFIX   0
C84   1    0.573942    0.608297    0.249951    11.00000    0.08089    0.45423 =
         0.08372   -0.02415    0.01078    0.04565
AFIX 137
H84A  2    0.657300    0.600124    0.210243    11.00000   -1.50000
H84B  2    0.558230    0.589716    0.309721    11.00000   -1.50000
H84C  2    0.598417    0.632773    0.287415    11.00000   -1.50000
AFIX   0
C82   1    0.052297    0.624747    0.211922    11.00000    0.08569    0.21012 =
         0.15008   -0.02562   -0.01824    0.01690
AFIX 137
H82A  2   -0.044674    0.624707    0.159471    11.00000   -1.50000
H82B  2    0.064534    0.648620    0.255027    11.00000   -1.50000
H82C  2    0.055059    0.603820    0.267631    11.00000   -1.50000
AFIX   0
HB    2    0.862544    0.619247    0.504041    11.00000    0.04551
H41A  2    1.304223    0.556476    0.873563    11.00000    0.03888
HA    2    0.478940    0.422595    0.849767    11.00000    0.04862
H5A   2    0.170091    0.350275    1.173427    11.00000    0.02909
H5B   2    0.319770    0.368970    1.231777    11.00000    0.06016
H41B  2    1.164704    0.529090    0.815757    11.00000    0.05849
HKLF    4

REM  gn207 in P2(1)
REM R1 =  0.0517 for   12646 Fo > 4sig(Fo)  and  0.0802 for all   17364 data
REM    814 parameters refined using      1 restraints

END

WGHT      0.0673      0.0000

REM Highest difference peak  0.257,  deepest hole -0.234,  1-sigma level  0.041
Q1    1   0.3662  0.5729  0.2186  11.00000  0.05    0.25
Q2    1   0.5777  0.6187  0.2984  11.00000  0.05    0.24
Q3    1   0.5909  0.6162  0.2478  11.00000  0.05    0.23
Q4    1   0.5006  0.5757  0.2576  11.00000  0.05    0.23
Q5    1   0.5190  0.6396  0.2266  11.00000  0.05    0.22
;
_shelx_res_checksum   49121

_shelx_hkl_file
;
   1   0   0  111.19    3.60
   1   0   0  149.39    3.70
  -2   0   0  117.29    3.30
   2   0   0  120.19    3.70
   2   0   0  112.99    3.80
  -2   0   0  122.89    3.70
   3   0   0 3114.29   74.99
  -3   0   0 3054.19   74.39
   3   0   0 3024.20   75.19
  -3   0   0 3023.20   74.89
  -4   0   0    7.90    1.00
   4   0   0    6.50    1.20
  -4   0   0    8.80    1.30
   4   0   0    9.80    1.50
   5   0   0  782.52   21.40
  -5   0   0  777.12   21.00
  -5   0   0  772.22   20.10
   5   0   0  775.12   21.00
  -6   0   0  178.68    5.90
   6   0   0  169.48    7.00
  -6   0   0  181.68    6.90
   6   0   0  171.88    6.80
  -7   0   0   78.39    5.00
   7   0   0   84.29    4.80
   7   0   0   77.79    5.10
  -7   0   0   77.19    3.70
  -8   0   0    2.40    2.20
  -8   0   0    2.10    1.50
   8   0   0   -2.20    2.00
   9   0   0   36.80    4.60
  -9   0   0   42.60    5.40
 -10   0   0   17.20    4.40
  10   0   0   31.60    4.90
  11   0   0   -2.50    3.30
 -11   0   0   -4.10    3.50
  -1  -1   0  939.91   22.60
   1  -1   0  893.11   22.60
  -1   1   0  922.61   21.20
   1   1   0  914.01   21.40
  -1   1   0  825.52   21.10
   1   1   0  794.52   21.30
   2  -1   0 1882.41   46.50
  -2  -1   0 1878.01   46.00
   2  -1   0 1890.61   46.40
  -2  -1   0 1894.11   46.40
   2   1   0 1881.01   46.60
  -2   1   0 1846.52   46.10
   2   1   0 1926.61   46.50
  -2   1   0 1904.31   46.40
  -3  -1   0  353.46    9.40
  -3  -1   0  332.37    8.80
   3  -1   0  323.27    9.50
   3  -1   0  339.47    9.40
  -3   1   0  337.27    9.20
  -3   1   0  330.67    8.70
   3   1   0  324.37    9.30
   3   1   0  328.27    9.50
   4  -1   0   99.69    3.90
  -4  -1   0   96.09    3.30
   4  -1   0   96.39    4.10
  -4  -1   0  101.59    4.00
   4   1   0   91.99    4.10
  -4   1   0  103.19    3.90
   4   1   0   99.79    4.00
  -4   1   0   99.39    3.40
   5  -1   0   11.00    1.80
  -5  -1   0   12.50    1.80
  -5  -1   0   13.00    1.40
   5  -1   0   11.20    1.80
   5   1   0    8.90    1.70
  -5   1   0    9.70    1.30
   5   1   0    9.90    1.70
  -5   1   0   10.40    1.70
  -6  -1   0   80.69    3.40
   6  -1   0   75.39    4.10
   6  -1   0   74.89    4.30
  -6  -1   0   79.59    4.30
  -6   1   0   78.69    4.30
   6   1   0   78.49    4.30
  -6   1   0   76.59    3.40
   6   1   0   81.09    4.50
   7  -1   0   43.30    3.80
  -7  -1   0   46.10    3.80
  -7  -1   0   43.40    2.70
   7  -1   0   41.40    3.60
   7   1   0   41.70    3.70
  -7   1   0   41.10    2.70
   7   1   0   36.80    3.90
  -7   1   0   41.40    3.60
  -8  -1   0   50.49    4.90
   8  -1   0   53.49    4.60
   8   1   0   52.39    4.80
  -8   1   0   42.40    4.60
  -8   1   0   50.89    3.40
   9  -1   0   12.60    3.10
  -9  -1   0    6.50    3.10
   9   1   0   13.10    3.40
  -9   1   0    6.90    3.00
 -10  -1   0    6.90    4.00
  10  -1   0    7.50    3.50
  10   1   0    8.80    3.60
 -10   1   0    5.80    3.80
  11  -1   0   -2.20    3.10
 -11  -1   0    5.20    4.70
  11   1   0   -0.90    2.80
 -11   1   0    4.60    4.40
   1  -2   0 2921.61   67.39
  -1  -2   0 2677.13   65.99
   1  -2   0 2521.35   66.89
   1   2   0 3006.20   71.19
  -1   2   0 2787.12   71.09
  -1   2   0 2722.83   71.09
   1   2   0 2898.51   69.49
   2  -2   0  217.58    6.40
  -2  -2   0  225.78    5.80
  -2  -2   0  229.18    6.20
   2  -2   0  215.48    6.20
  -2   2   0  217.18    5.80
   2   2   0  210.98    6.30
   2   2   0  221.88    6.30
  -2   2   0  228.38    6.00
  -3  -2   0  294.27    7.70
  -3  -2   0  296.97    8.30
   3  -2   0  287.77    8.50
   3  -2   0  281.47    8.20
  -3   2   0  287.57    7.70
  -3   2   0  299.87    8.10
   3   2   0  284.97    8.40
   3   2   0  282.67    8.50
  -4  -2   0  251.37    7.70
   4  -2   0  236.88    7.70
  -4  -2   0  243.88    6.80
   4  -2   0  245.08    7.60
   4   2   0  243.08    7.90
  -4   2   0  249.28    7.50
   4   2   0  250.37    7.80
  -4   2   0  237.38    6.90
  -5  -2   0   51.09    3.10
  -5  -2   0   47.60    2.30
   5  -2   0   47.90    2.90
   5  -2   0   47.30    3.10
   5   2   0   47.80    3.20
   5   2   0   55.39    3.40
  -5   2   0   50.89    2.90
  -5   2   0   60.49    2.60
   6  -2   0   55.29    3.60
   6  -2   0   53.49    3.60
  -6  -2   0   51.79    3.50
  -6  -2   0   49.20    2.60
   6   2   0   47.90    3.60
  -6   2   0   49.10    2.70
  -6   2   0   53.59    3.40
   6   2   0   54.09    3.70
   7  -2   0   -1.60    1.60
   7  -2   0    1.60    1.70
  -7  -2   0    3.90    2.00
  -7  -2   0    3.60    1.30
  -7   2   0    3.10    2.10
  -7   2   0    1.30    1.20
   7   2   0    1.90    1.90
   7   2   0    2.10    1.90
   8  -2   0   10.10    2.80
  -8  -2   0   15.40    3.20
  -8   2   0   18.90    2.30
  -8   2   0   12.00    2.90
   8   2   0   13.70    3.00
   9  -2   0   64.59    5.70
  -9  -2   0   63.09    6.10
  -9   2   0   64.99    6.00
   9   2   0   73.09    6.10
  10  -2   0   10.30    3.30
 -10  -2   0    9.70    4.00
  10   2   0   -1.30    3.00
 -10   2   0    8.20    3.90
 -11  -2   0   -1.20    3.80
  11  -2   0    3.70    3.40
  11   2   0    5.20    3.90
   1  -3   0  819.32   20.90
  -1  -3   0  853.11   20.80
   1  -3   0  839.72   21.00
   1   3   0  845.32   21.10
  -1   3   0  821.82   20.60
   1   3   0  844.72   21.00
   2  -3   0 1367.16   34.00
   2  -3   0 1366.16   34.20
  -2  -3   0 1375.26   33.50
  -2  -3   0 1376.86   34.10
   2   3   0 1430.66   34.40
  -2   3   0 1355.46   33.80
  -2   3   0 1356.66   33.90
   2   3   0 1368.56   34.40
   3  -3   0  755.42   19.60
  -3  -3   0  770.52   18.90
   3  -3   0  743.93   19.80
  -3  -3   0  759.52   19.60
  -3   3   0  774.82   19.20
   3   3   0  743.53   19.60
  -3   3   0  735.43   18.90
   3   3   0  747.53   19.70
  -4  -3   0  177.18    5.20
   4  -3   0  173.98    6.10
  -4  -3   0  181.38    6.00
   4  -3   0  175.98    5.90
  -4   3   0  182.68    5.80
   4   3   0  182.88    6.30
  -4   3   0  172.98    5.30
   4   3   0  178.68    6.20
  -5  -3   0   66.09    2.70
  -5  -3   0   66.09    3.50
   5  -3   0   62.09    3.40
   5  -3   0   71.59    3.70
  -5   3   0   68.69    3.00
   5   3   0   67.79    4.00
  -5   3   0   75.09    3.60
   5   3   0   69.89    3.80
   6  -3   0   30.10    2.70
   6  -3   0   27.10    2.90
  -6  -3   0   30.50    2.00
  -6  -3   0   28.90    2.80
   6   3   0   34.50    3.10
  -6   3   0   32.70    2.70
  -6   3   0   29.50    2.10
   6   3   0   31.70    3.10
  -7  -3   0   14.10    2.60
   7  -3   0   11.90    2.20
  -7  -3   0   12.20    1.80
   7  -3   0   12.80    2.60
   7   3   0   11.80    2.50
  -7   3   0   14.80    2.00
   7   3   0   11.20    2.50
  -7   3   0   13.00    2.50
   8  -3   0   41.30    4.10
  -8  -3   0   41.50    4.30
  -8   3   0   37.50    4.00
   8   3   0   45.00    4.80
  -8   3   0   44.10    3.20
  -9  -3   0    1.00    3.10
   9  -3   0    2.20    2.70
  -9   3   0    0.30    2.90
   9   3   0    0.80    2.40
  10  -3   0   51.79    5.70
 -10  -3   0   45.70    6.10
 -10   3   0   46.10    5.80
  10   3   0   55.39    6.30
  11  -3   0   -1.60    3.30
 -11  -3   0    8.80    5.00
  11   3   0    4.40    3.70
   0  -4   0 5237.68  127.29
   0   4   0 5059.19  117.89
   0   4   0 4454.05  117.89
   1  -4   0 2399.56   58.79
  -1  -4   0 2398.66   60.89
   1   4   0 2418.06   59.19
  -1   4   0 2282.87   59.79
   1   4   0 2454.95   59.19
  -1   4   0 2472.55   59.49
  -2  -4   0  304.97    7.60
   2  -4   0  295.67    8.20
  -2  -4   0  302.37    8.20
   2  -4   0  291.67    8.40
  -2   4   0  302.17    8.10
   2   4   0  309.87    8.80
  -2   4   0  313.37    8.10
   2   4   0  313.27    8.80
  -3  -4   0  515.75   12.80
   3  -4   0  492.75   13.70
  -3  -4   0  501.45   13.50
   3  -4   0  497.75   13.50
   3   4   0  488.35   13.80
  -3   4   0  517.35   13.20
   3   4   0  507.45   13.80
  -3   4   0  491.75   13.00
  -4  -4   0   20.60    1.30
   4  -4   0   18.00    1.80
   4  -4   0   19.00    1.80
  -4  -4   0   18.20    1.80
  -4   4   0   21.70    1.50
   4   4   0   20.00    2.00
   4   4   0   18.80    2.10
  -4   4   0   20.40    1.70
  -5  -4   0  401.26   11.80
   5  -4   0  392.06   11.90
   5  -4   0  380.96   11.50
  -5  -4   0  375.56   10.50
  -5   4   0  375.26   10.90
  -5   4   0  408.56   11.60
   5   4   0  387.76   12.10
   5   4   0  399.76   12.10
   6  -4   0  212.88    7.90
  -6  -4   0  207.58    6.50
   6  -4   0  210.08    7.50
  -6  -4   0  202.78    7.80
   6   4   0  204.68    8.00
   6   4   0  207.38    7.90
  -6   4   0  214.48    7.70
  -6   4   0  213.68    6.90
   7  -4   0   80.39    5.10
  -7  -4   0   86.89    5.10
   7  -4   0   82.19    4.70
  -7   4   0   87.89    5.00
  -7   4   0   84.79    4.00
   7   4   0   76.09    5.00
   7   4   0   85.79    5.20
   8  -4   0   15.20    3.00
  -8  -4   0   14.10    3.20
  -8   4   0   18.60    3.40
   8   4   0   14.90    3.20
  -8   4   0   17.40    2.40
   9  -4   0    9.20    3.10
  -9  -4   0   13.80    3.70
  -9   4   0   13.80    3.60
   9   4   0   17.60    3.60
  -9   4   0   12.80    2.50
  10  -4   0   13.10    3.50
 -10  -4   0   -1.80    3.50
 -10   4   0   -2.20    2.90
  10   4   0    4.90    3.40
 -11  -4   0   11.50    5.30
  11  -4   0   21.30    4.60
  11   4   0   27.90    5.30
   0  -5   0    0.40    0.60
   0   5   0   -0.40    0.60
  -1  -5   0  600.44   14.90
   1  -5   0  579.04   15.30
   1   5   0  544.45   15.20
  -1   5   0  585.94   14.50
   1   5   0  600.84   15.20
  -1   5   0  588.24   15.50
  -2  -5   0 1140.89   28.40
   2  -5   0 1173.58   29.40
   2  -5   0 1134.79   29.20
  -2  -5   0 1196.68   29.10
  -2   5   0 1216.38   29.40
  -2   5   0 1152.38   29.50
   2   5   0 1185.28   30.20
   2   5   0 1214.48   30.30
   3  -5   0  208.68    6.60
   3  -5   0  220.68    6.90
  -3  -5   0  222.18    6.70
  -3  -5   0  220.58    5.90
   3   5   0  219.18    7.10
   3   5   0  217.58    7.10
  -3   5   0  234.78    6.40
  -3   5   0  217.18    6.20
  -4  -5   0  100.99    4.10
   4  -5   0   86.89    3.90
  -4  -5   0   94.69    3.20
   4  -5   0   95.89    3.90
  -4   5   0   95.39    3.40
  -4   5   0  105.29    3.80
   4   5   0   95.29    4.30
   4   5   0   92.39    4.30
  -5  -5   0  181.48    5.60
  -5  -5   0  188.68    6.80
   5  -5   0  176.58    6.70
   5  -5   0  186.78    6.50
  -5   5   0  190.88    6.00
   5   5   0  187.58    7.00
   5   5   0  180.08    7.00
  -5   5   0  187.68    6.50
  -6  -5   0   45.60    2.50
  -6  -5   0   43.30    3.40
   6  -5   0   49.50    3.50
   6  -5   0   50.59    3.30
   6   5   0   39.50    3.60
  -6   5   0   51.89    2.80
  -6   5   0   49.10    3.30
   6   5   0   49.00    3.90
   7  -5   0   99.39    5.20
  -7  -5   0   96.39    5.60
   7  -5   0   97.99    5.60
  -7   5   0  110.89    5.60
  -7   5   0   99.89    4.50
   7   5   0  106.99    5.80
   7   5   0  106.29    5.90
  -8  -5   0    8.10    2.90
   8  -5   0   16.00    3.20
  -8   5   0   11.30    3.00
  -8   5   0   17.60    2.40
   8   5   0   18.90    3.30
   9  -5   0   10.30    3.00
  -9  -5   0    2.90    3.00
   9   5   0    7.10    3.30
  -9   5   0    6.40    3.20
  -9   5   0    9.40    2.30
  10  -5   0    3.70    3.10
 -10  -5   0   -1.70    3.70
  10   5   0    4.30    3.20
  11  -5   0    2.80    3.30
 -11  -5   0   -3.80    3.80
  11   5   0   -3.10    3.50
   0  -6   0 1247.18   29.90
   0  -6   0 1192.38   30.80
   0   6   0 1174.78   28.80
   1  -6   0 2300.07   57.39
  -1  -6   0 2350.26   57.59
   1   6   0 2195.18   56.49
   1   6   0 2362.86   56.49
  -1   6   0 2256.37   55.59
  -1   6   0 2314.57   56.79
   2  -6   0  556.14   15.00
  -2  -6   0  565.94   14.60
   2  -6   0  560.44   14.80
  -2  -6   0  558.04   13.90
  -2   6   0  575.04   14.80
  -2   6   0  600.54   14.60
   2   6   0  562.44   15.70
   2   6   0  593.14   15.70
  -3  -6   0  354.86    9.90
   3  -6   0  337.87    9.80
  -3  -6   0  346.97    9.00
   3  -6   0  341.17   10.00
   3   6   0  341.57   10.30
   3   6   0  339.57   10.20
  -3   6   0  357.96    9.30
  -3   6   0  339.27    9.30
   4  -6   0   46.00    2.90
  -4  -6   0   52.89    2.80
   4  -6   0   50.19    2.80
  -4  -6   0   51.39    2.10
   4   6   0   42.50    3.00
  -4   6   0   48.60    2.30
   4   6   0   52.09    3.20
  -4   6   0   60.19    2.60
  -5  -6   0   68.89    2.80
   5  -6   0   67.79    3.70
   5  -6   0   69.19    3.60
  -5  -6   0   68.69    3.70
   5   6   0   70.19    4.00
   5   6   0   60.89    3.90
  -5   6   0   63.69    2.90
  -5   6   0   70.59    3.40
   6  -6   0   17.90    2.40
  -6  -6   0   24.80    2.80
   6  -6   0   27.10    2.70
  -6  -6   0   19.60    1.80
   6   6   0   28.40    3.20
  -6   6   0   24.40    2.40
   6   6   0   19.70    2.70
  -6   6   0   20.90    1.90
  -7  -6   0  124.59    6.40
   7  -6   0  119.89    6.20
   7  -6   0  123.39    5.80
  -7   6   0  143.69    6.40
   7   6   0  128.19    6.60
  -7   6   0  124.89    5.20
   7   6   0  130.09    6.80
  -8  -6   0   12.70    3.20
   8  -6   0    7.30    2.50
   8   6   0    7.40    2.90
  -8   6   0   12.10    3.00
  -8   6   0   13.60    2.40
   9  -6   0   26.70    3.90
  -9  -6   0   20.90    4.30
   9   6   0   31.80    4.80
  -9   6   0   24.70    3.10
  -9   6   0   31.50    4.60
 -10  -6   0   16.50    4.90
  10  -6   0   24.40    4.30
  10   6   0   29.40    5.00
 -11  -6   0    1.90    4.20
  11  -6   0    2.50    3.20
  11   6   0   -3.10    3.00
   0  -7   0    0.00    0.40
   0  -7   0    0.20    1.10
   0   7   0   -0.40    1.10
   0   7   0    0.20    0.40
   1  -7   0 2305.77   57.49
  -1  -7   0 2333.67   56.79
   1   7   0 2442.86   57.29
   1   7   0 2217.18   55.99
   1   7   0 2188.58   57.19
  -1   7   0 2289.67   56.09
  -1   7   0 2374.36   57.49
  -2  -7   0  129.39    4.20
   2  -7   0  129.49    4.60
   2   7   0  125.89    4.80
   2   7   0  127.19    4.70
  -2   7   0  133.89    3.60
  -2   7   0  124.99    3.90
   3  -7   0 1441.36   36.80
  -3  -7   0 1474.45   35.80
  -3  -7   0 1473.35   36.80
   3  -7   0 1435.96   37.00
   3   7   0 1504.05   38.70
   3   7   0 1527.55   38.80
  -3   7   0 1547.65   37.50
  -3   7   0 1480.95   37.60
  -4  -7   0   19.30    1.30
   4  -7   0   19.80    2.00
  -4  -7   0   17.40    1.90
   4  -7   0   19.40    2.00
   4   7   0   20.00    2.40
  -4   7   0   20.80    1.50
  -4   7   0   23.50    1.70
   4   7   0   16.40    2.10
  -5  -7   0  153.88    6.10
  -5  -7   0  153.28    4.90
   5  -7   0  154.78    5.80
   5  -7   0  150.18    6.00
  -5   7   0  159.58    5.30
   5   7   0  156.58    6.50
  -5   7   0  154.58    5.60
   5   7   0  151.98    6.40
   6  -7   0   82.69    4.60
   6  -7   0   78.89    4.30
  -6  -7   0   80.39    4.60
   6   7   0   78.59    4.80
   6   7   0   86.09    5.00
  -6   7   0   83.59    4.30
  -6   7   0   85.09    3.70
   7  -7   0    2.70    1.70
  -7  -7   0    3.20    2.10
   7  -7   0    5.70    2.30
   7   7   0    3.90    2.30
  -7   7   0    1.80    1.40
  -7   7   0    1.40    1.80
   7   7   0    1.50    2.20
  -8  -7   0    3.80    2.60
   8  -7   0    4.60    2.40
  -8   7   0    4.10    2.20
   8   7   0    3.70    2.40
  -8   7   0    5.10    1.70
   9  -7   0    3.80    2.40
  -9  -7   0    0.50    3.00
   9   7   0    4.30    2.90
  -9   7   0    1.50    1.90
  10  -7   0   56.39    5.50
 -10  -7   0   45.30    6.60
  10   7   0   41.20    5.50
 -11  -7   0   -4.60    3.50
  11  -7   0    2.60    3.60
  11   7   0   -0.90    3.30
   0  -8   0  913.01   24.20
   0  -8   0  939.81   22.90
   0   8   0  891.91   23.20
   0   8   0  875.61   21.80
   1  -8   0  440.16   12.50
  -1  -8   0  433.26   12.40
  -1  -8   0  457.05   11.60
  -1   8   0  426.16   12.40
   1   8   0  430.66   10.70
   1   8   0  415.06   12.30
  -1   8   0  435.06   11.00
   1   8   0  437.56   12.30
   2  -8   0 1327.47   34.70
  -2  -8   0 1417.86   34.40
  -2   8   0 1365.46   34.10
   2   8   0 1350.76   35.30
  -2   8   0 1468.95   33.80
  -2   8   0 1359.16   35.90
   2   8   0 1342.67   35.30
  -3  -8   0  280.67    8.20
   3  -8   0  269.97    8.30
  -3  -8   0  271.07    7.20
   3  -8   0  264.97    8.40
   3   8   0  279.17    9.10
  -3   8   0  282.27    8.00
  -3   8   0  291.37    7.80
   3   8   0  286.17    9.10
  -4  -8   0   82.89    3.80
   4  -8   0   76.19    3.80
   4  -8   0   79.29    3.70
  -4  -8   0   80.09    2.80
  -4   8   0   81.29    3.30
   4   8   0   85.79    4.40
  -4   8   0   86.39    3.40
   4   8   0   82.09    4.40
   5  -8   0  215.88    7.80
  -5  -8   0  218.38    6.50
   5  -8   0  223.78    7.60
  -5  -8   0  224.88    7.90
   5   8   0  217.98    8.10
  -5   8   0  218.88    6.80
  -5   8   0  220.18    7.10
   5   8   0  202.38    8.00
   6  -8   0   73.79    4.10
  -6  -8   0   69.09    4.40
   6  -8   0   73.69    4.30
   6   8   0   76.49    4.80
   6   8   0   73.69    4.70
  -6   8   0   72.69    4.00
  -6   8   0   72.19    3.60
   7  -8   0    7.80    2.00
   7  -8   0    7.70    2.30
  -7  -8   0   11.70    2.70
   7   8   0    7.70    2.60
  -7   8   0    8.30    1.80
  -7   8   0    7.50    2.30
   7   8   0    5.10    2.50
  -8  -8   0   14.20    3.30
   8  -8   0   19.50    3.30
  -8   8   0   12.00    2.90
  -8   8   0   12.60    2.30
   8   8   0   19.60    3.60
   9  -8   0    6.20    2.60
  -9  -8   0    1.60    3.00
  -9   8   0    3.00    2.00
   9   8   0    0.00    2.60
 -10  -8   0   -0.10    3.80
  10  -8   0    2.80    3.00
  10   8   0    5.80    3.50
 -11  -8   0   17.70    5.40
  11  -8   0    8.00    3.60
  11   8   0    8.40    4.40
   0  -9   0    1.10    1.60
   0  -9   0    2.00    0.60
   0   9   0    2.30    1.40
   0   9   0    1.00    0.50
   1  -9   0  799.72   21.40
  -1  -9   0  833.52   20.40
  -1  -9   0  779.42   21.30
   1   9   0  806.42   21.70
   1   9   0  815.82   19.90
  -1   9   0  818.72   21.90
  -1   9   0  803.52   20.30
  -2  -9   0  111.19    3.90
   2  -9   0  113.89    4.40
  -2   9   0  112.89    3.60
  -2   9   0  109.09    5.10
   2   9   0  109.79    4.70
   2   9   0  112.79    4.70
  -2   9   0  116.79    3.20
  -3  -9   0  206.88    6.60
   3  -9   0  196.18    6.80
   3  -9   0  198.58    6.60
  -3   9   0  220.68    6.00
   3   9   0  210.38    7.40
  -3   9   0  209.28    6.10
   3   9   0  200.88    5.60
   3   9   0  205.68    7.40
   4  -9   0  271.57    9.10
  -4  -9   0  289.97    9.00
  -4  -9   0  291.27    7.70
   4  -9   0  274.07    8.90
   4   9   0  287.77    9.60
  -4   9   0  294.57    8.30
  -4   9   0  275.57    8.30
   4   9   0  283.67    9.60
   5  -9   0  189.28    7.10
   5  -9   0  188.58    6.90
  -5  -9   0  193.08    7.10
  -5  -9   0  187.68    5.70
  -5   9   0  196.18    6.50
   5   9   0  183.48    7.50
   5   9   0  187.18    7.50
  -5   9   0  189.08    6.20
   6  -9   0  224.08    8.40
   6  -9   0  223.48    8.10
  -6  -9   0  222.48    8.60
  -6   9   0  217.98    7.30
   6   9   0  221.88    8.80
  -6   9   0  218.68    7.80
   6   9   0  210.08    8.60
   7  -9   0  121.59    5.80
  -7  -9   0  114.09    6.30
   7  -9   0  111.49    5.90
  -7   9   0  119.59    5.20
   7   9   0  123.79    6.80
  -7   9   0  116.89    5.90
   7   9   0  115.99    6.70
  -8  -9   0   36.50    4.60
   8  -9   0   35.90    4.10
   8   9   0   41.10    4.80
  -8   9   0   34.30    3.10
  -9  -9   0    0.60    3.00
   9  -9   0   12.40    3.00
   9   9   0    2.90    2.90
  -9   9   0    5.80    2.20
 -10  -9   0    0.90    4.00
  10  -9   0   12.90    3.80
  10   9   0    9.90    3.80
 -10   9   0   11.60    2.80
 -11  -9   0   -0.30    4.20
  11  -9   0    3.00    3.50
  11   9   0    1.20    3.60
   0 -10   0  682.03   16.70
   0 -10   0  642.34   18.20
   0  10   0  674.93   18.40
   0  10   0  656.93   16.60
  -1 -10   0 1422.36   36.40
   1 -10   0 1416.36   36.40
  -1 -10   0 1419.16   35.30
   1  10   0 1462.75   36.00
  -1  10   0 1449.55   36.30
  -1  10   0 1501.75   38.20
   1  10   0 1485.65   38.00
  -2 -10   0  668.83   17.40
   2 -10   0  656.03   18.00
  -2  10   0  657.03   17.00
   2  10   0  633.04   18.40
  -2  10   0  669.33   18.90
   2  10   0  686.93   16.40
   2  10   0  669.23   18.40
   3 -10   0  276.17    8.80
  -3 -10   0  280.57    8.40
   3 -10   0  272.27    8.60
   3  10   0  279.07    9.30
   3  10   0  272.87    7.20
  -3  10   0  292.27    7.70
   3  10   0  272.87    9.30
  -3  10   0  279.27    8.00
   4 -10   0  753.42   20.60
  -4 -10   0  757.82   20.40
  -4 -10   0  738.93   18.90
   4 -10   0  741.33   20.30
   4  10   0  768.12   21.70
  -4  10   0  754.72   20.20
  -4  10   0  789.22   20.10
   4  10   0  783.52   21.80
  -5 -10   0  111.29    5.10
   5 -10   0  108.89    5.10
   5 -10   0  113.29    5.00
   5  10   0  121.99    5.80
   5  10   0  111.39    5.70
  -5  10   0  118.39    4.70
  -5  10   0  119.89    4.50
  -6 -10   0  116.19    5.90
   6 -10   0  125.79    5.80
   6 -10   0  125.19    5.60
  -6  10   0  119.69    4.80
   6  10   0  113.79    6.10
  -6  10   0  116.29    5.40
   6  10   0  126.99    6.40
   7 -10   0   29.90    3.60
   7 -10   0   19.20    2.80
  -7 -10   0   25.60    3.60
   7  10   0   26.10    3.60
  -7  10   0   24.40    2.70
   7  10   0   23.90    3.60
  -7  10   0   18.30    2.90
   8 -10   0    2.50    2.10
  -8 -10   0    2.00    2.60
  -8  10   0    3.90    1.90
   8  10   0    5.60    2.70
  -9 -10   0   18.60    4.60
   9 -10   0   12.90    3.30
  -9  10   0   18.70    2.90
   9  10   0   16.20    4.30
  10 -10   0   -0.40    2.50
 -10 -10   0    5.90    4.30
 -10  10   0    7.90    2.70
  10  10   0    6.60    3.60
  11 -10   0    4.20    3.50
 -11 -10   0    2.30    4.40
  11  10   0    5.70    3.80
   0 -11   0    2.30    1.50
   0 -11   0    1.60    0.60
   0  11   0    1.00    1.20
   1 -11   0   90.79    4.20
  -1 -11   0   93.99    3.20
  -1 -11   0   87.59    4.30
   1  11   0   91.69    2.70
   1  11   0   90.59    4.30
  -1  11   0   92.39    3.00
  -1  11   0   96.19    4.50
  -2 -11   0  782.02   20.20
   2 -11   0  762.42   20.80
   2  11   0  782.02   21.20
   2  11   0  741.23   21.20
  -2  11   0  753.92   21.60
   2  11   0  782.32   18.90
  -2  11   0  775.82   19.60
   3 -11   0  681.33   18.80
  -3 -11   0  691.43   18.50
   3 -11   0  687.83   19.00
   3  11   0  699.23   19.80
   3  11   0  698.33   19.80
   3  11   0  684.93   17.20
  -3  11   0  684.23   18.10
  -3  11   0  714.13   17.70
   4 -11   0  405.56   12.30
  -4 -11   0  412.76   12.10
   4 -11   0  390.96   12.00
   4  11   0  387.06   10.30
  -4  11   0  402.66   11.20
   4  11   0  402.96   12.80
  -4  11   0  423.46   11.20
   4  11   0  388.46   12.70
  -5 -11   0  167.78    6.70
   5 -11   0  169.28    6.80
   5 -11   0  164.88    6.50
   5  11   0  168.58    7.20
  -5  11   0  163.88    5.80
   5  11   0  147.29    6.90
  -5  11   0  158.48    5.60
   6 -11   0  200.08    7.90
  -6 -11   0  200.48    8.20
   6 -11   0  214.68    7.90
  -6  11   0  209.68    7.50
   6  11   0  201.78    8.60
  -6  11   0  205.28    7.00
   6  11   0  200.98    8.60
   7 -11   0   43.20    3.90
  -7 -11   0   39.40    4.50
   7 -11   0   47.10    3.80
   7  11   0   45.50    4.70
  -7  11   0   42.00    3.30
   7  11   0   40.10    4.60
  -8 -11   0   78.49    6.10
   8 -11   0   88.19    5.80
   8  11   0   75.89    6.00
  -8  11   0   81.69    4.70
  -9 -11   0    3.80    3.30
   9 -11   0   10.70    3.20
  -9  11   0    3.60    2.00
   9  11   0    4.20    3.40
 -10 -11   0    3.30    3.90
  10 -11   0    8.10    3.50
 -10  11   0    2.60    2.00
  10  11   0    0.10    3.60
 -11 -11   0    5.10    4.50
  11 -11   0    3.20    3.20
  11  11   0    2.10    4.10
   0 -12   0 1752.92   42.30
   0 -12   0 1676.73   44.00
   0  12   0 1765.12   45.20
   0  12   0 1733.03   42.90
  -1 -12   0   33.90    2.80
  -1 -12   0   36.10    1.80
   1 -12   0   33.20    3.00
   1  12   0   35.40    1.30
  -1  12   0   32.50    2.80
  -1  12   0   33.20    1.50
   1  12   0   30.90    2.70
  -2 -12   0  129.99    4.50
   2 -12   0  124.29    5.20
  -2  12   0  133.19    4.20
   2  12   0  134.19    5.70
  -2  12   0  117.09    5.80
   2  12   0  137.59    5.90
   2  12   0  132.49    3.60
   3 -12   0  521.55   15.40
  -3 -12   0  540.95   14.90
   3 -12   0  535.25   15.30
  -3  12   0  565.94   14.20
  -3  12   0  550.34   14.60
   3  12   0  555.64   13.70
   3  12   0  529.55   16.30
   3  12   0  558.44   16.40
  -3  12   0  533.75   17.00
   4 -12   0  143.39    5.80
   4 -12   0  148.59    6.10
  -4 -12   0  148.39    5.80
   4  12   0  142.99    4.10
   4  12   0  145.99    6.50
   4  12   0  150.18    6.70
  -4  12   0  142.29    5.00
  -4  12   0  153.68    4.90
   5 -12   0  218.88    7.80
   5 -12   0  205.58    8.00
  -5 -12   0  221.88    8.00
   5  12   0  238.08    9.10
   5  12   0  215.28    8.80
  -5  12   0  229.58    7.40
  -5  12   0  219.78    7.30
   6 -12   0  171.88    6.90
   6 -12   0  153.08    6.80
  -6 -12   0  148.29    6.90
   6  12   0  158.68    7.70
  -6  12   0  167.48    6.20
   6  12   0  171.58    8.00
  -6  12   0  159.98    6.50
   7 -12   0    3.50    2.20
   7 -12   0    8.20    2.20
  -7 -12   0    2.80    2.40
   7  12   0    6.70    2.70
   7  12   0    1.80    2.30
  -7  12   0    0.60    1.60
  -8 -12   0   38.80    5.10
   8 -12   0   37.10    4.40
  -8  12   0   30.30    3.20
   8  12   0   38.90    5.00
   9 -12   0    7.20    3.10
  -9 -12   0    0.70    3.30
  -9  12   0    8.70    2.30
   9  12   0    4.60    3.40
 -10 -12   0    3.20    3.90
  10 -12   0    1.70    2.70
  10  12   0    8.00    4.10
 -10  12   0    6.30    2.40
 -11 -12   0    1.20    4.60
  11  12   0   -1.00    3.40
   0 -13   0    2.50    1.50
   0  13   0    1.90    1.40
  -1 -13   0  381.06   12.00
   1 -13   0  379.86   12.20
  -1 -13   0  402.06   10.70
  -1  13   0  405.06   10.80
   1  13   0  412.96   10.50
  -1  13   0  418.26   13.10
   1  13   0  404.26   12.80
  -2 -13   0  660.13   18.40
  -2 -13   0  645.04   17.30
   2 -13   0  630.24   18.20
   2  13   0  650.43   15.90
   2  13   0  618.04   18.60
  -2  13   0  634.34   19.20
   2  13   0  681.43   18.80
  -2  13   0  634.04   16.70
  -3 -13   0  558.44   15.50
   3 -13   0  557.74   16.00
  -3  13   0  573.64   14.80
   3  13   0  570.74   17.20
  -3  13   0  561.34   17.90
   3  13   0  576.54   14.30
   3  13   0  572.44   17.20
  -3  13   0  606.14   15.40
   4 -13   0  104.79    4.80
   4 -13   0   96.09    4.80
  -4 -13   0   90.99    4.50
   4  13   0   99.29    5.50
   4  13   0   99.29    5.30
   4  13   0   99.59    2.90
  -4  13   0   97.39    3.70
  -4  13   0   95.39    3.80
  -5 -13   0   66.99    4.10
   5 -13   0   70.89    4.00
   5 -13   0   71.39    4.30
  -5  13   0   68.59    3.30
   5  13   0   65.99    4.60
  -5  13   0   73.39    3.50
   5  13   0   61.99    4.80
  -6 -13   0  239.18    9.20
   6 -13   0  232.98    8.80
   6 -13   0  227.48    9.00
   6  13   0  240.68   10.00
  -6  13   0  235.38    8.00
   6  13   0  237.38    9.90
   7 -13   0   32.80    3.80
  -7 -13   0   38.40    4.40
   7 -13   0   33.60    3.60
   7  13   0   39.90    4.90
   7  13   0   39.50    4.70
  -7  13   0   32.90    2.90
   8 -13   0    2.30    2.40
  -8 -13   0    0.90    2.90
   8  13   0    3.80    2.80
  -8  13   0    4.40    1.90
   9 -13   0   13.60    3.20
  -9 -13   0   19.30    4.80
  -9  13   0   15.50    2.80
   9  13   0   21.50    4.40
 -10 -13   0    6.40    4.60
  10 -13   0   -0.60    2.90
 -10  13   0    3.10    2.40
  10  13   0    3.90    3.90
 -11 -13   0    3.00    5.10
  11  13   0   11.80    4.80
   0 -14   0  427.76   13.60
   0 -14   0  450.45   11.80
   0  14   0  450.95   11.70
   0  14   0  455.85   14.20
  -1 -14   0   28.60    2.90
  -1 -14   0   36.30    2.00
   1 -14   0   31.80    3.00
  -1  14   0   35.40    1.80
   1  14   0   37.00    3.20
  -1  14   0   36.10    3.30
   1  14   0   40.90    1.50
  -2 -14   0  278.17    9.60
   2 -14   0  290.07    9.70
  -2 -14   0  280.37    8.50
  -2  14   0  298.27    8.40
  -2  14   0  294.97   10.80
   2  14   0  295.97   10.30
   2  14   0  294.77    7.60
  -3 -14   0  122.29    4.90
   3 -14   0  125.49    5.50
  -3  14   0  111.59    6.30
   3  14   0  118.89    5.90
  -3  14   0  124.09    3.80
   3  14   0  132.39    6.30
  -3  14   0  126.69    4.50
   3  14   0  131.09    3.40
   4 -14   0   43.40    3.40
  -4 -14   0   53.19    3.20
   4 -14   0   50.59    3.30
   4  14   0   47.80    3.90
  -4  14   0   49.60    2.70
   4  14   0   49.00    4.00
  -4  14   0   49.30    2.50
   5 -14   0   72.29    4.50
   5 -14   0   72.49    4.20
  -5 -14   0   71.89    4.30
   5  14   0   80.49    5.20
   5  14   0   69.79    5.00
  -5  14   0   77.79    3.70
  -6 -14   0  136.29    6.70
   6 -14   0  133.99    6.30
   6 -14   0  141.79    6.60
   6  14   0  152.38    7.70
  -6  14   0  128.89    5.50
   6  14   0  150.98    7.70
   7 -14   0   13.10    2.70
  -7 -14   0   13.40    3.10
   7 -14   0   11.70    2.60
  -7  14   0   11.90    2.10
   7  14   0    6.80    2.90
   7  14   0   10.40    3.10
  -8 -14   0    7.20    3.70
   8 -14   0    9.80    2.70
  -8  14   0    6.70    2.10
   8  14   0   14.30    3.50
   9 -14   0    4.70    2.80
  -9 -14   0   -1.60    3.10
   9  14   0    2.60    3.20
  -9  14   0    2.30    2.00
  10 -14   0    2.20    3.10
 -10 -14   0    0.70    3.70
 -10  14   0    6.10    2.80
  10  14   0    3.20    3.50
 -11  14   0    3.30    2.90
  11  14   0    0.10    4.10
   0 -15   0    1.70    0.80
   0 -15   0    3.80    1.80
   0  15   0    2.80    1.90
  -1 -15   0  326.17    9.30
  -1 -15   0  314.27   10.70
   1 -15   0  321.57   11.00
   1  15   0  334.87    8.80
   1  15   0  343.77   11.60
  -1  15   0  326.37    9.20
  -1  15   0  344.07   11.80
   2 -15   0  154.68    6.70
  -2 -15   0  166.98    5.60
  -2 -15   0  146.09    6.50
  -2  15   0  166.18    7.50
  -2  15   0  163.08    5.20
   2  15   0  164.18    7.10
   2  15   0  168.68    4.50
  -3 -15   0  159.58    6.00
   3 -15   0  167.98    6.60
   3  15   0  171.28    7.40
   3  15   0  164.08    7.60
  -3  15   0  171.98    8.00
   3  15   0  171.88    4.40
  -3  15   0  173.08    5.60
  -4 -15   0  134.39    5.60
   4 -15   0  126.19    5.90
   4 -15   0  136.19    6.00
  -4  15   0  124.69    4.60
   4  15   0  121.39    6.40
   4  15   0  131.29    6.70
  -4  15   0  123.79    4.60
  -5 -15   0    6.00    1.90
   5 -15   0   11.70    2.30
   5 -15   0    5.40    1.80
  -5  15   0    5.90    1.40
   5  15   0    5.30    2.40
   5  15   0    6.20    2.70
   6 -15   0  347.27   11.90
  -6 -15   0  330.57   12.10
   6 -15   0  332.97   11.50
   6  15   0  334.97   12.70
  -6  15   0  330.07   10.50
   6  15   0  336.97   12.70
   7 -15   0    1.40    1.90
   7 -15   0    0.70    1.90
  -7 -15   0   -0.50    2.40
   7  15   0    1.70    2.50
   7  15   0    2.00    2.80
  -7  15   0    0.50    1.40
  -8 -15   0   58.89    5.70
   8 -15   0   67.79    5.10
   8  15   0   75.89    6.60
  -8  15   0   55.09    4.20
   9 -15   0   13.90    3.30
  -9 -15   0   11.90    4.50
   9  15   0   23.00    4.60
  -9  15   0   16.50    3.20
 -10 -15   0   -1.20    3.90
  10 -15   0   -0.30    2.50
 -10  15   0   -1.90    2.20
  10  15   0    4.60    3.70
 -11  15   0    6.10    3.00
  11  15   0    0.80    3.90
   0 -16   0  219.28    6.60
   0  16   0  218.28    6.10
   0  16   0  206.28    8.50
   1 -16   0   56.59    4.10
  -1 -16   0   53.79    4.10
  -1 -16   0   58.29    2.80
   1  16   0   59.19    4.30
  -1  16   0   62.19    2.50
   1  16   0   59.79    2.20
  -1  16   0   58.59    4.60
  -2 -16   0  589.34   16.20
   2 -16   0  585.04   17.60
  -2 -16   0  586.54   17.60
   2  16   0  617.44   18.60
  -2  16   0  598.34   16.00
   2  16   0  615.64   15.20
  -2  16   0  595.04   18.90
   3 -16   0  176.48    7.20
  -3 -16   0  181.98    6.60
   3  16   0  187.98    8.30
   3  16   0  196.88    5.00
   3  16   0  193.18    8.10
  -3  16   0  189.68    8.70
  -3  16   0  186.68    6.20
   4 -16   0    9.20    2.00
   4 -16   0   10.60    2.30
  -4 -16   0    7.90    1.80
   4  16   0    6.40    2.40
   4  16   0   11.20    2.80
  -4  16   0   11.30    1.50
   5 -16   0   60.09    4.10
  -5 -16   0   53.49    4.20
   5 -16   0   63.19    4.20
  -5  16   0   53.99    3.10
   5  16   0   57.29    5.10
   5  16   0   56.19    4.70
   6 -16   0  142.89    6.80
   6 -16   0  142.69    7.10
  -6 -16   0  145.89    7.10
  -6  16   0  158.78    6.20
   6  16   0  142.39    7.90
   6  16   0  156.68    8.20
   7 -16   0    4.60    2.50
   7 -16   0    7.80    2.40
  -7 -16   0    7.40    3.00
   7  16   0    6.60    2.80
  -7  16   0    7.30    1.90
   7  16   0    4.80    2.90
   8 -16   0   16.50    3.40
  -8 -16   0   11.30    3.60
   8  16   0    7.70    3.40
  -8  16   0   17.90    2.70
   9 -16   0    2.00    2.80
  -9 -16   0   -1.70    3.30
   9  16   0    3.70    3.10
  -9  16   0    2.10    2.00
 -10 -16   0    3.30    4.10
  10 -16   0    4.20    3.20
  10  16   0    3.50    3.90
 -10  16   0    8.40    2.90
 -11  16   0    5.20    2.80
  11  16   0    5.10    4.70
   0 -17   0    4.80    2.10
   0 -17   0    2.60    1.00
   0  17   0    4.00    0.80
   0  17   0   -1.70    1.60
   1 -17   0   21.10    3.00
  -1 -17   0   19.30    1.80
  -1 -17   0   17.10    2.80
   1 -17   0   20.00    1.20
  -1  17   0   22.50    1.60
  -1  17   0   15.60    2.90
   1  17   0   22.00    1.20
   1  17   0   19.40    3.00
   2 -17   0  262.37   10.00
  -2 -17   0  254.87    9.90
  -2 -17   0  287.67    8.60
  -2  17   0  276.57   10.90
   2  17   0  292.97    7.40
  -2  17   0  275.07    8.20
   2  17   0  279.37   10.60
   3 -17   0   23.20    2.80
  -3 -17   0   21.10    2.20
  -3 -17   0   26.20    3.10
   3  17   0   17.90    3.10
   3  17   0   20.30    0.90
  -3  17   0   23.90    1.80
   3  17   0   17.60    2.90
  -3  17   0   23.30    3.70
   4 -17   0    9.70    2.40
   4 -17   0   12.60    2.40
  -4 -17   0   13.70    2.20
  -4  17   0   15.60    1.80
   4  17   0   17.30    3.30
   4  17   0   19.60    3.30
   5 -17   0   71.49    4.60
   5 -17   0   80.79    5.00
  -5 -17   0   72.49    4.70
  -5  17   0   73.69    3.70
   5  17   0   74.69    5.90
   5  17   0   79.39    5.60
   6 -17   0  144.49    7.20
   6 -17   0  145.19    6.90
  -6 -17   0  143.89    7.20
   6  17   0  152.08    8.40
   6  17   0  149.59    8.20
  -6  17   0  142.39    5.90
   7 -17   0  106.19    6.30
  -7 -17   0   90.99    6.30
   7 -17   0   94.89    5.80
   7  17   0   93.49    7.30
  -7  17   0   95.99    5.00
   7  17   0   97.79    6.90
   8 -17   0   -1.20    1.90
  -8 -17   0   -4.50    2.70
  -8  17   0   -1.50    1.80
   8  17   0   -1.20    2.70
   9 -17   0   13.20    3.20
  -9 -17   0    4.70    3.80
   9  17   0    9.10    4.10
  -9  17   0    5.90    2.40
  10 -17   0   17.70    4.40
 -10 -17   0   12.80    4.90
  10  17   0   15.80    5.30
 -10  17   0   16.30    3.30
 -11  17   0    7.80    3.20
  11  17   0   12.80    5.10
   0 -18   0  522.25   13.90
   0 -18   0  500.25   16.30
   0  18   0  542.15   14.30
   0  18   0  552.84   17.60
  -1 -18   0  374.26   10.70
   1 -18   0  362.36    9.50
  -1 -18   0  348.67   12.70
   1 -18   0  350.96   12.40
   1  18   0  376.36   13.30
   1  18   0  389.66   10.10
  -1  18   0  374.16   10.50
  -1  18   0  392.86   13.70
  -2 -18   0   20.90    3.00
   2 -18   0   19.30    3.10
  -2 -18   0   19.50    2.00
   2  18   0   21.30    1.10
  -2  18   0   22.90    1.80
   2  18   0   17.80    3.00
  -2  18   0   21.20    3.40
  -3 -18   0  146.89    5.90
   3 -18   0  148.59    6.60
  -3 -18   0  146.49    6.90
   3  18   0  146.69    7.30
  -3  18   0  152.88    5.30
  -3  18   0  149.39    7.90
   4 -18   0  122.09    6.20
  -4 -18   0  119.69    5.60
   4 -18   0  129.19    6.10
  -4  18   0  121.79    4.80
   4  18   0  127.69    7.20
   4  18   0  126.29    6.80
   5 -18   0   87.79    5.40
   5 -18   0   95.99    5.40
  -5 -18   0   92.09    5.30
  -5  18   0   86.19    4.10
   5  18   0   91.69    6.10
   5  18   0  100.09    6.60
  -6 -18   0   69.99    5.50
   6 -18   0   73.29    4.80
   6 -18   0   58.89    4.70
  -6  18   0   69.69    3.90
   6  18   0   71.49    6.00
   6  18   0   71.49    5.90
   7 -18   0    5.30    2.30
  -7 -18   0    5.00    2.90
   7 -18   0    7.50    2.40
  -7  18   0    5.90    2.10
   7  18   0    8.10    3.40
   7  18   0    5.60    3.00
   8 -18   0    4.50    2.70
  -8 -18   0    7.20    3.40
  -8  18   0    3.10    2.00
   8  18   0    4.40    3.30
  -9 -18   0    5.30    3.80
   9 -18   0    6.40    2.90
   9  18   0    7.20    4.20
  -9  18   0    4.40    2.30
 -10 -18   0   12.10    5.00
  10 -18   0   15.90    4.30
  10  18   0   15.70    5.10
 -10  18   0    2.70    2.70
   0 -19   0    5.70    1.30
   0 -19   0    4.50    2.20
   0  19   0    8.90    2.50
   0  19   0    7.40    1.00
   1 -19   0  108.69    5.90
  -1 -19   0   90.19    5.60
   1 -19   0   95.69    3.20
  -1 -19   0   99.29    4.10
  -1  19   0  107.99    3.90
  -1  19   0  115.69    6.60
   1  19   0  102.59    6.10
   1  19   0  110.59    3.50
  -2 -19   0   71.29    3.70
   2 -19   0   68.79    4.70
  -2 -19   0   66.79    4.80
   2  19   0   79.19    2.60
  -2  19   0   82.79    5.70
  -2  19   0   80.69    3.30
   2  19   0   72.09    5.20
  -3 -19   0    2.90    2.40
  -3 -19   0    4.80    1.60
   3 -19   0    3.40    1.80
  -3  19   0    4.40    1.20
   3  19   0    4.50    2.10
  -3  19   0    1.00    2.10
  -4 -19   0   28.40    3.00
   4 -19   0   31.10    3.30
   4 -19   0   35.80    3.90
   4  19   0   26.20    3.90
  -4  19   0   32.50    2.30
   4  19   0   30.50    4.00
  -4  19   0   25.70    4.30
   5 -19   0    4.40    2.30
   5 -19   0    5.50    2.20
  -5 -19   0    5.90    2.30
  -5  19   0    4.30    1.50
   5  19   0    3.00    2.60
   5  19   0    4.00    2.60
   6 -19   0   71.29    5.30
  -6 -19   0   58.79    5.30
   6 -19   0   53.19    4.70
   6  19   0   62.49    6.00
   6  19   0   57.99    5.90
  -6  19   0   61.39    3.70
  -7 -19   0   19.30    4.20
   7 -19   0   11.90    3.00
   7 -19   0   16.40    3.50
   7  19   0   15.60    3.80
  -7  19   0   17.60    2.80
   7  19   0   13.20    3.60
   8 -19   0   41.30    4.70
  -8 -19   0   32.70    5.20
   8  19   0   34.40    5.40
  -8  19   0   34.80    3.70
  -9 -19   0    9.00    4.30
   9 -19   0   16.10    3.90
   9  19   0    9.50    4.20
  -9  19   0   17.30    3.30
 -10 -19   0   21.40    6.00
  10 -19   0   13.50    4.30
  10  19   0   25.90    5.70
 -10  19   0   18.10    3.40
   0 -20   0  422.56   14.90
   0 -20   0  436.86   12.20
   0  20   0  468.25   12.60
   0  20   0  470.55   16.10
   1 -20   0  285.97   11.20
   1 -20   0  294.27    8.10
  -1 -20   0  295.47   11.10
  -1 -20   0  301.47    9.20
  -1  20   0  318.87    9.10
   1  20   0  311.67    8.60
   1  20   0  305.87   12.00
  -1  20   0  335.77   12.50
  -2 -20   0  141.29    7.00
  -2 -20   0  139.89    5.70
   2 -20   0  140.49    7.10
  -2  20   0  160.18    8.10
   2  20   0  147.39    7.50
   2  20   0  151.58    4.40
  -2  20   0  146.09    5.20
   3 -20   0  135.89    6.90
  -3 -20   0  138.79    7.20
  -3 -20   0  128.19    5.80
   3  20   0  133.59    7.30
  -3  20   0  128.39    7.90
  -3  20   0  136.69    5.10
  -4 -20   0   73.49    4.50
   4 -20   0   76.69    5.10
  -4 -20   0   74.69    5.60
   4  20   0   72.89    5.50
  -4  20   0   74.39    3.60
  -4  20   0   72.89    6.50
  -5 -20   0  162.78    7.80
   5 -20   0  162.38    7.80
   5 -20   0  191.28    8.30
   5  20   0  180.18    9.00
  -5  20   0  172.08    6.50
   5  20   0  172.78    9.20
   6 -20   0   -0.30    2.00
  -6 -20   0   -0.80    2.20
   6 -20   0    1.10    1.80
  -6  20   0   -1.20    1.30
   6  20   0   -3.70    2.20
   6  20   0    0.70    2.40
   7 -20   0   51.19    4.70
   7 -20   0   51.79    4.80
  -7 -20   0   53.39    5.90
   7  20   0   53.69    6.00
  -7  20   0   45.80    3.60
   7  20   0   50.09    5.90
   8 -20   0    5.80    2.80
  -8 -20   0    7.70    3.70
  -8  20   0    7.30    2.30
   8  20   0    8.30    3.60
  -9 -20   0    8.80    4.30
   9 -20   0   20.40    4.30
  -9  20   0   16.60    3.10
   9  20   0   20.20    5.00
 -10 -20   0   -2.10    4.00
  10  20   0    4.60    4.40
 -10  20   0    1.00    2.40
   0 -21   0    8.10    2.70
   0 -21   0    4.10    1.40
   0  21   0    5.00    2.30
   0  21   0    5.70    1.00
  -1 -21   0  235.78    8.00
   1 -21   0  248.18   10.10
  -1 -21   0  243.28   10.40
  -1  21   0  264.67    7.80
   1  21   0  256.77   10.80
   1  21   0  262.27    7.40
  -1  21   0  259.37   11.00
  -2 -21   0   34.10    4.10
  -2 -21   0   31.00    2.70
   2 -21   0   23.30    3.30
  -2  21   0   36.20    2.20
   2  21   0   22.90    3.60
  -2  21   0   35.70    4.40
   2  21   0   33.70    1.60
  -3 -21   0   89.49    4.90
  -3 -21   0   99.99    6.40
   3 -21   0   93.89    5.80
   3  21   0   97.99    6.30
  -3  21   0   89.99    3.90
  -3  21   0  100.79    6.80
  -4 -21   0   13.90    2.60
  -4 -21   0   15.50    3.20
   4 -21   0   18.30    3.00
   4  21   0   17.90    3.50
  -4  21   0   23.40    4.50
  -4  21   0   13.90    2.00
   5 -21   0    4.50    2.40
  -5 -21   0    4.80    2.40
   5 -21   0    6.40    2.50
   5  21   0    2.00    2.60
  -5  21   0    4.90    1.60
   5  21   0    0.20    2.70
   6 -21   0   74.49    5.60
   6 -21   0   62.79    5.00
  -6 -21   0   55.09    5.00
   6  21   0   62.89    6.00
  -6  21   0   58.89    3.80
   6  21   0   62.49    6.40
   7 -21   0   35.70    4.40
  -7 -21   0   40.50    5.20
   7 -21   0   44.70    4.60
  -7  21   0   40.30    3.50
   7  21   0   41.90    5.60
   7  21   0   35.50    5.30
  -8 -21   0    2.90    3.50
   8 -21   0    2.00    2.80
  -8  21   0    5.10    2.40
   8  21   0    7.70    3.70
   9 -21   0    7.30    3.40
  -9 -21   0    3.20    3.80
   9  21   0    6.80    4.00
  -9  21   0    5.30    2.30
 -10 -21   0   19.40    5.80
 -10  21   0   15.30    3.70
  10  21   0   20.90    5.50
   0 -22   0  260.77    8.30
   0 -22   0  258.47   10.90
   0  22   0  254.17   11.10
   0  22   0  273.67    7.80
  -1 -22   0  499.25   16.60
  -1 -22   0  484.25   14.30
   1 -22   0  496.25   16.50
   1  22   0  538.75   13.80
  -1  22   0  502.75   17.90
   1  22   0  522.25   17.80
  -1  22   0  521.45   14.20
  -2 -22   0  111.19    5.20
   2 -22   0  111.69    6.40
  -2 -22   0  123.39    7.00
  -2  22   0  119.89    7.40
  -2  22   0  123.49    4.70
   2  22   0  126.29    3.80
   2  22   0  109.39    6.80
  -3 -22   0   67.09    4.30
  -3 -22   0   52.29    4.90
   3 -22   0   63.49    4.80
  -3  22   0   65.69    6.10
  -3  22   0   70.89    3.40
   3  22   0   65.99    5.50
   4 -22   0  205.58    8.90
  -4 -22   0  187.78    9.10
  -4 -22   0  194.38    8.30
  -4  22   0  208.28   11.10
   4  22   0  188.98    9.60
  -4  22   0  216.78    7.20
  -5 -22   0   72.39    5.30
   5 -22   0   88.59    5.70
   5 -22   0   84.09    5.70
  -5 -22   0   85.19    6.60
   5  22   0   66.99    6.00
  -5  22   0   77.59    4.20
   6 -22   0   45.10    4.30
  -6 -22   0   43.60    4.80
  -6  22   0   45.50    3.40
   6  22   0   41.40    5.40
   6  22   0   55.89    6.10
   7 -22   0   48.00    5.00
   7 -22   0   31.70    4.30
  -7 -22   0   27.30    4.70
   7  22   0   33.20    5.10
  -7  22   0   37.60    3.50
   7  22   0   42.30    5.70
   8 -22   0   21.50    4.10
  -8 -22   0   13.60    4.30
  -8  22   0   20.60    3.30
   8  22   0   16.90    4.40
  -9 -22   0    0.40    4.30
   9 -22   0    8.20    3.60
   9  22   0    7.50    3.80
  -9  22   0    2.00    2.30
 -10 -22   0    1.40    5.10
  10  22   0    0.50    3.80
 -10  22   0    2.30    2.80
   0 -23   0    5.70    1.60
   0  23   0    5.80    2.60
   0  23   0   11.00    1.30
  -1 -23   0  209.18    9.50
   1 -23   0  196.58    9.40
  -1 -23   0  209.48    7.50
  -1  23   0  231.78    7.30
   1  23   0  221.88   10.20
  -1  23   0  234.48   10.70
   1  23   0  237.08    6.80
  -2 -23   0   43.00    3.40
   2 -23   0   40.50    4.60
  -2 -23   0   38.10    4.60
  -2  23   0   40.10    5.00
  -2  23   0   41.70    2.50
   2  23   0   39.80    4.70
  -3 -23   0   25.40    3.20
   3 -23   0   17.80    3.20
  -3 -23   0   14.90    3.40
  -3  23   0   21.70    4.40
   3  23   0   20.30    3.80
  -3  23   0   23.50    2.30
   4 -23   0   85.29    5.90
  -4 -23   0   79.49    5.10
  -4 -23   0   80.39    6.10
   4  23   0   88.99    6.70
  -4  23   0   87.49    4.30
  -4  23   0   84.89    7.10
  -5 -23   0    7.00    2.70
   5 -23   0    9.50    3.00
   5 -23   0   10.40    2.90
  -5 -23   0    7.70    3.30
  -5  23   0    7.80    1.90
   5  23   0    6.10    3.20
  -6 -23   0    9.20    3.50
   6 -23   0    7.90    3.10
   6 -23   0    9.70    2.90
  -6 -23   0    9.90    3.40
  -6  23   0    7.10    2.00
   6  23   0   15.60    4.10
   6  23   0   10.50    3.60
   7 -23   0   16.10    3.40
  -7 -23   0   14.70    4.10
   7 -23   0   10.00    3.20
  -7  23   0   13.90    2.70
   7  23   0   15.40    4.10
   7  23   0    8.70    3.70
  -8 -23   0    2.70    3.50
   8 -23   0   10.00    3.20
  -8  23   0    9.20    2.70
   8  23   0    8.90    4.00
  -9 -23   0    3.10    4.50
   9 -23   0   -1.20    2.50
   9  23   0    7.40    4.50
  -9  23   0    4.10    2.40
 -10  23   0   34.70    4.60
  10  23   0   46.90    7.70
   0 -24   0  565.94   18.80
   0  24   0  588.84   20.30
   0  24   0  614.24   16.20
  -1 -24   0   94.59    7.00
   1 -24   0   97.19    6.40
  -1 -24   0   98.09    4.80
  -1  24   0  110.99    7.20
  -1  24   0  106.39    4.10
   1  24   0  102.09    3.70
   1  24   0   96.39    6.60
   2 -24   0   45.10    4.80
  -2 -24   0   39.40    4.90
  -2 -24   0   38.70    3.40
  -2  24   0   48.20    5.70
   2  24   0   38.40    4.90
  -2  24   0   41.40    2.60
  -3 -24   0   61.39    4.50
  -3 -24   0   63.49    6.00
   3 -24   0   57.29    5.20
  -3  24   0   58.49    6.20
   3  24   0   57.09    5.50
  -3  24   0   67.99    3.40
  -4 -24   0    3.30    3.10
  -4 -24   0    3.80    2.30
   4 -24   0   -0.90    2.30
  -4  24   0    4.30    3.60
   4  24   0    3.00    3.00
  -4  24   0    4.50    1.50
  -5 -24   0   26.70    3.90
   5 -24   0   27.50    3.80
   5 -24   0   28.80    4.30
  -5 -24   0   28.50    4.70
  -5  24   0   30.50    2.80
   5  24   0   22.70    4.50
   6 -24   0    3.40    2.60
   6 -24   0    1.90    2.30
  -6 -24   0    3.90    2.80
  -6 -24   0    3.10    3.10
   6  24   0    8.00    3.50
  -6  24   0    6.80    2.00
   7 -24   0   54.09    5.20
   7 -24   0   49.60    5.20
  -7 -24   0   53.19    6.20
  -7 -24   0   44.70    5.70
   7  24   0   54.39    6.50
   7  24   0   39.10    5.50
  -7  24   0   38.80    3.60
   8 -24   0    9.10    3.30
  -8 -24   0    3.40    3.70
  -8  24   0    8.40    2.70
   8  24   0    8.30    4.40
  -9 -24   0    1.90    4.20
   9 -24   0    9.70    3.50
  -9  24   0   14.10    3.20
   9  24   0   10.70    4.50
  10  24   0    0.70    3.90
   0 -25   0    9.70    3.20
   0  25   0   15.90    3.70
   0  25   0   12.40    1.50
   1 -25   0   12.40    3.20
  -1 -25   0   18.10    2.50
  -1 -25   0   14.40    3.60
  -1  25   0   15.20    3.90
   1  25   0   20.10    1.60
  -1  25   0   22.00    2.00
   1  25   0   18.40    3.80
   2 -25   0    0.20    2.40
  -2 -25   0    6.20    3.10
  -2 -25   0    2.70    1.80
   2  25   0    1.60    2.50
  -2  25   0   -0.30    1.00
  -2  25   0    1.30    2.60
  -3 -25   0   36.10    3.80
   3 -25   0   33.70    4.30
  -3 -25   0   33.00    4.70
  -3  25   0   36.10    2.60
  -3  25   0   34.70    5.10
   3  25   0   37.30    5.00
  -4 -25   0   59.99    5.10
   4 -25   0   58.59    5.40
  -4 -25   0   68.59    6.50
   4  25   0   58.39    6.00
  -4  25   0   63.99    3.80
  -4  25   0   62.69    7.30
   5 -25   0   24.40    3.80
   5 -25   0   35.30    4.60
  -5 -25   0   26.60    4.10
  -5 -25   0   26.30    4.60
  -5  25   0   30.80    3.10
   5  25   0   28.50    4.90
   6 -25   0   60.39    5.30
  -6 -25   0   56.09    5.80
   6 -25   0   67.89    5.70
  -6 -25   0   61.39    5.70
  -6  25   0   59.29    4.10
   6  25   0   63.49    6.50
  -7 -25   0    1.60    3.20
   7 -25   0    3.80    2.50
  -7 -25   0    6.90    3.50
   7 -25   0    8.50    3.40
   7  25   0    4.80    3.50
  -7  25   0    4.40    2.10
   8 -25   0    5.30    3.30
  -8 -25   0    3.60    3.80
  -8  25   0    6.10    2.40
   8  25   0    6.30    4.20
   9 -25   0   14.50    4.20
  -9 -25   0   17.60    5.40
   9  25   0   22.00    5.40
  -9  25   0   17.10    3.40
   0 -26   0  229.88   10.70
   0  26   0  257.17   11.80
   0  26   0  263.47    8.00
  -1 -26   0   73.99    6.30
   1 -26   0   69.39    6.00
   1  26   0   69.39    6.10
  -1  26   0   72.39    3.60
   1  26   0   84.99    3.30
  -1  26   0   84.09    6.70
  -2 -26   0   47.50    3.90
  -2 -26   0   45.10    5.50
   2  26   0   54.59    5.70
  -2  26   0   50.59    6.00
  -2  26   0   61.89    3.20
  -3 -26   0   68.79    6.70
  -3 -26   0   81.09    5.20
   3 -26   0   68.79    5.70
   3  26   0   77.29    6.60
  -3  26   0   73.19    3.80
  -3  26   0   67.99    6.60
  -4 -26   0   39.40    4.60
  -4 -26   0   28.50    4.70
   4 -26   0   37.70    4.50
  -4  26   0   47.60    6.60
  -4  26   0   37.00    3.20
   4  26   0   35.30    5.30
   5 -26   0   13.80    3.20
  -5 -26   0   16.40    3.80
   5 -26   0   16.30    3.80
  -5 -26   0   21.30    4.20
  -5  26   0   22.20    2.80
   5  26   0   16.10    4.20
   6 -26   0    7.20    2.80
  -6 -26   0    3.80    3.50
  -6 -26   0    3.70    3.00
   6 -26   0    8.70    3.40
  -6  26   0    2.00    1.80
   6  26   0    5.10    3.60
   7 -26   0    1.70    3.00
  -7 -26   0    1.40    3.30
   7 -26   0   -0.10    2.70
  -7 -26   0    0.50    3.80
  -7  26   0   -1.00    1.70
   7  26   0    6.90    3.70
   8 -26   0    9.90    3.70
  -8 -26   0   10.70    4.50
  -8  26   0    9.70    2.70
   8  26   0    4.90    4.20
  -9 -26   0   -1.20    4.70
   9 -26   0   13.10    3.90
   9  26   0    7.40    5.00
  -9  26   0    9.70    3.00
   0 -27   0    3.30    3.00
   0  27   0    7.60    1.40
   0  27   0    4.30    2.90
  -1 -27   0    4.10    3.20
   1 -27   0    3.90    2.90
  -1  27   0    4.60    1.40
   1  27   0    1.40    2.70
   1  27   0    3.10    1.00
  -1  27   0    2.40    2.90
  -2 -27   0   39.40    5.20
   2 -27   0   37.90    4.80
  -2 -27   0   43.20    3.90
  -2  27   0   43.10    2.80
   2  27   0   43.60    5.70
  -2  27   0   43.90    5.70
  -3 -27   0   43.30    5.50
   3 -27   0   41.70    5.10
  -3 -27   0   46.60    4.40
  -3  27   0   44.30    3.10
   3  27   0   37.90    5.20
  -3  27   0   35.50    5.80
  -4 -27   0   65.09    6.80
  -4 -27   0   59.99    5.30
   4 -27   0   69.09    5.70
   4  27   0   58.29    6.60
  -4  27   0   72.79    4.00
  -4  27   0   64.39    7.50
  -5 -27   0   13.00    3.80
   5 -27   0    5.00    2.60
  -5 -27   0    2.40    2.80
   5 -27   0    6.20    3.20
   5  27   0    2.40    3.20
  -5  27   0    8.40    2.10
  -6 -27   0    6.20    3.40
   6 -27   0    6.80    3.10
   6 -27   0    8.30    3.40
  -6 -27   0    5.70    3.60
   6  27   0   11.80    4.10
  -6  27   0    5.10    2.10
   7 -27   0   -0.40    2.90
   7 -27   0    0.00    2.30
  -7 -27   0    1.10    3.40
  -7 -27   0    1.30    2.90
  -7  27   0    2.70    2.20
   7  27   0    1.80    3.60
  -8 -27   0    1.40    4.40
   8 -27   0    4.10    3.30
  -8  27   0    5.00    2.50
   8  27   0    4.20    3.90
  -9 -27   0    3.80    5.20
   9  27   0    4.20    4.40
  -9  27   0   -0.40    2.30
   0 -28   0  302.67   12.70
   0  28   0  335.17    9.80
   0  28   0  310.07   14.00
  -1 -28   0   19.70    4.30
   1 -28   0   10.00    3.60
   1  28   0   17.20    4.10
  -1  28   0   20.20    2.20
  -1  28   0   16.20    4.10
  -2 -28   0   67.39    6.50
   2 -28   0   53.99    5.50
  -2 -28   0   65.69    4.80
  -2  28   0   65.99    6.70
  -2  28   0   80.89    4.00
   2  28   0   68.59    6.60
  -3 -28   0   67.89    6.60
  -3 -28   0   67.09    5.20
   3 -28   0   69.69    6.10
   3  28   0   59.89    6.30
  -3  28   0   76.89    4.10
  -3  28   0   72.59    7.10
  -4 -28   0   21.30    4.40
  -4 -28   0   23.50    4.00
   4 -28   0   17.90    3.70
   4  28   0   31.40    5.20
  -4  28   0   25.80    5.50
  -4  28   0   21.00    2.60
  -5 -28   0   13.90    4.10
  -5 -28   0   10.60    3.50
   5 -28   0   14.40    3.60
   5 -28   0   11.50    3.20
  -5  28   0   12.40    2.40
   5  28   0    5.60    3.90
   6 -28   0    7.30    3.10
  -6 -28   0    1.80    3.50
   6 -28   0    4.10    2.90
  -6 -28   0   11.30    4.20
   6  28   0   12.00    4.50
  -6  28   0    9.50    2.40
  -7 -28   0    4.30    3.80
   7 -28   0    4.50    2.80
   7 -28   0    2.30    2.80
  -7 -28   0    3.10    3.70
  -7  28   0    5.40    2.20
   7  28   0    1.40    3.70
   8 -28   0   13.10    3.80
  -8 -28   0    6.40    5.00
  -8  28   0    2.80    2.50
   8  28   0    4.80    4.40
  -9 -28   0    4.50    5.50
  -9  28   0   15.00    3.40
   9  28   0   15.10    5.60
   0 -29   0   13.20    4.00
   0  29   0   10.20    3.70
   0  29   0    9.80    1.60
  -1 -29   0   16.90    4.40
   1 -29   0    3.40    3.50
  -1  29   0    6.40    1.50
   1  29   0    9.50    3.70
  -1  29   0    1.70    3.00
   2 -29   0   19.50    4.10
  -2 -29   0   18.40    4.50
  -2  29   0   22.20    2.50
   2  29   0   16.10    4.20
  -2  29   0   21.50    4.70
  -3 -29   0    2.00    3.20
  -3 -29   0    1.80    2.30
   3 -29   0    0.10    2.70
  -3  29   0    3.10    3.30
  -3  29   0    1.60    1.50
   3  29   0    4.10    3.30
  -4 -29   0   74.69    7.20
   4 -29   0   72.59    6.30
  -4 -29   0   57.09    5.50
  -4  29   0   76.39    4.40
  -4  29   0   74.79    7.60
   4  29   0   78.29    7.70
  -5 -29   0   -3.90    2.70
   5 -29   0    2.20    2.80
  -5 -29   0   -0.10    3.10
   5 -29   0    4.40    2.90
  -5  29   0    4.60    2.10
   5  29   0   -3.00    3.00
   6 -29   0   67.09    6.30
  -6 -29   0   69.39    6.60
  -6 -29   0   54.49    6.50
   6 -29   0   64.79    6.10
   6  29   0   71.19    8.00
  -6  29   0   67.99    4.60
  -7 -29   0   15.20    5.10
  -7 -29   0   21.30    5.20
   7 -29   0    4.60    3.40
   7 -29   0   10.60    3.60
  -7  29   0   13.20    2.80
   7  29   0    8.00    4.20
  -8 -29   0    7.70    4.60
   8 -29   0    2.10    3.40
   8  29   0    0.60    4.00
  -9 -29   0    1.70    5.60
   9  29   0    6.50    4.70
   0 -30   0  207.28   10.80
   0  30   0  215.68   12.10
   0  30   0  238.38    7.70
  -1 -30   0    1.30    3.30
   1 -30   0    4.70    3.20
  -1  30   0    4.10    1.50
  -1  30   0    3.00    3.20
   1  30   0    3.20    3.60
  -2 -30   0   44.80    6.00
   2 -30   0   45.90    5.60
  -2  30   0   67.19    7.70
   2  30   0   49.99    6.60
  -2  30   0   57.79    3.40
  -3 -30   0  133.09    7.40
  -3 -30   0  132.49    8.90
   3 -30   0  138.49    8.50
  -3  30   0  128.49    9.90
  -3  30   0  143.69    6.10
   3  30   0  151.18    9.80
  -4 -30   0   13.70    3.60
  -4 -30   0   10.60    4.30
   4 -30   0   13.00    3.50
   4  30   0    6.80    3.90
  -4  30   0    9.80    2.20
  -4  30   0    4.70    3.90
   5 -30   0   59.99    6.60
  -5 -30   0   65.79    7.40
   5 -30   0   44.60    5.40
  -5 -30   0   54.99    6.30
   5  30   0   66.49    7.70
  -5  30   0   64.99    4.30
   6 -30   0   39.70    5.60
  -6 -30   0   22.10    5.10
  -6 -30   0   21.00    5.20
   6 -30   0   17.50    3.80
  -6  30   0   28.60    3.60
   6  30   0   26.50    5.70
  -7 -30   0   -2.80    3.40
  -7 -30   0   -3.10    3.30
   7 -30   0    0.70    2.90
   7  30   0    2.20    4.20
  -7  30   0   -0.60    2.10
  -8 -30   0   -0.40    4.30
   8  30   0    7.50    5.00
  -8  30   0   14.10    3.30
   0 -31   0    4.30    3.80
   0  31   0    7.80    3.80
   0  31   0    4.80    1.40
  -1 -31   0    3.10    3.20
   1 -31   0    4.80    3.30
   1  31   0    0.30    3.00
  -1  31   0    3.00    1.40
  -1  31   0    2.40    3.60
  -2 -31   0   20.70    4.70
   2 -31   0   18.60    4.20
   2  31   0   14.20    4.40
  -2  31   0   22.10    2.50
  -2  31   0   16.30    4.50
  -3 -31   0   80.49    7.20
   3 -31   0   65.19    6.00
  -3  31   0   74.59    8.40
   3  31   0   92.09    7.90
  -3  31   0   74.09    4.30
  -4 -31   0    4.40    3.10
  -4 -31   0    1.10    3.20
   4 -31   0    7.20    3.00
   4  31   0    1.00    3.50
  -4  31   0    7.20    4.50
  -4  31   0    4.10    1.90
  -5 -31   0   26.60    4.70
   5 -31   0   31.00    4.90
   5 -31   0   38.30    5.50
  -5 -31   0   18.90    4.70
   5  31   0   29.80    5.80
  -5  31   0   44.60    7.40
  -5  31   0   32.70    3.50
   6 -31   0   12.80    3.60
   6 -31   0    8.00    3.40
  -6 -31   0   10.10    4.00
  -6 -31   0    8.80    4.30
   6  31   0    7.80    4.70
  -6  31   0   10.90    2.90
   7 -31   0    3.40    3.10
  -7 -31   0   -2.20    4.10
   7 -31   0    0.80    3.10
  -7 -31   0   -6.40    3.40
  -7  31   0    5.60    2.60
   7  31   0    3.30    4.00
   8 -31   0    4.10    3.40
  -8 -31   0    7.70    5.30
  -8  31   0    4.60    2.90
   8  31   0    2.60    4.40
   0 -32   0   26.50    5.00
   0  32   0   26.20    5.10
  -1 -32   0   55.09    6.40
   1 -32   0   34.60    5.30
  -1  32   0   52.09    3.30
  -1  32   0   45.60    6.40
   1  32   0   40.60    6.10
  -2 -32   0   37.30    5.60
   2 -32   0   30.80    5.00
   2  32   0   35.20    5.80
  -2  32   0   29.80    5.50
  -2  32   0   35.00    3.30
   3 -32   0    5.70    3.10
  -3 -32   0    3.80    3.80
  -3  32   0    5.70    2.00
   3  32   0    4.20    3.80
  -3  32   0    5.80    3.90
   4 -32   0   19.30    4.00
  -4 -32   0   19.30    4.30
  -4 -32   0   27.00    5.20
  -4  32   0   12.40    5.10
   4  32   0   21.40    5.20
  -4  32   0   21.40    2.90
   5 -32   0   16.20    4.00
  -5 -32   0    8.90    3.80
   5 -32   0   20.10    4.00
  -5 -32   0   20.50    4.80
  -5  32   0   15.10    2.70
  -5  32   0   19.70    5.50
   5  32   0   11.50    4.40
  -6 -32   0    3.20    3.90
   6 -32   0   -1.50    2.70
  -6 -32   0    3.80    3.80
   6 -32   0    0.00    2.80
   6  32   0    3.70    3.90
  -6  32   0    1.20    2.00
   7 -32   0    4.10    3.70
  -7 -32   0    0.00    3.80
  -7 -32   0    0.80    3.90
   7 -32   0   10.90    3.60
  -7  32   0   10.20    2.90
   7  32   0    8.80    4.80
   8 -32   0   15.10    4.20
  -8 -32   0   10.50    5.40
  -8  32   0   15.90    3.40
   8  32   0   18.10    5.90
   0 -33   0    3.40    3.30
   0  33   0    4.40    3.70
  -1 -33   0   18.50    4.70
   1 -33   0   16.90    4.30
  -1  33   0   18.10    2.30
   1  33   0   12.70    4.70
  -1  33   0   17.40    4.80
   2 -33   0    5.10    3.30
  -2 -33   0   11.20    4.60
   2  33   0    8.60    4.10
  -2  33   0    8.80    4.30
  -2  33   0    9.00    1.90
   3 -33   0   17.80    4.00
  -3 -33   0   24.30    5.30
   3  33   0    9.30    4.30
  -3  33   0   19.30    5.20
  -3  33   0   26.30    3.00
   4 -33   0   12.10    3.60
  -4 -33   0    6.20    3.90
   4  33   0    3.60    4.10
  -4  33   0   14.30    2.60
  -4  33   0   13.10    4.70
   5 -33   0   -0.70    2.60
   5 -33   0   -1.20    2.90
  -5 -33   0    2.00    4.00
  -5  33   0    0.60    4.20
  -5  33   0    0.40    2.20
   5  33   0   -1.10    3.20
   6 -33   0    1.10    2.60
  -6 -33   0    3.20    4.20
   6 -33   0   -4.10    2.50
  -6 -33   0    5.80    4.10
   6  33   0   -1.90    4.00
   7 -33   0    8.30    3.80
  -7 -33   0   15.20    5.30
  -7 -33   0   10.10    5.40
   7 -33   0   15.20    4.60
   7  33   0    6.00    4.50
   8 -33   0    5.80    3.60
  -8 -33   0    2.60    5.60
   8  33   0    4.40    4.70
   0 -34   0   85.79    7.60
   0  34   0  115.99    9.60
   1 -34   0   13.10    4.10
  -1 -34   0   16.50    4.60
  -1  34   0   19.40    2.50
  -1  34   0   25.30    5.40
   1  34   0   19.80    4.90
   2 -34   0   19.50    4.50
  -2 -34   0   16.60    4.70
  -2  34   0   16.90    2.50
  -2  34   0   11.00    4.40
   2  34   0   11.60    4.40
   3 -34   0   20.40    4.50
  -3 -34   0   14.80    4.80
  -3  34   0   23.60    5.70
   3  34   0   16.10    5.00
   4 -34   0    2.20    2.80
  -4 -34   0    0.60    4.10
  -4  34   0    2.40    3.90
   4  34   0    5.90    4.40
  -4  34   0    2.90    1.90
   5 -34   0   35.60    5.30
  -5 -34   0   36.60    6.50
   5 -34   0   40.60    5.80
   5  34   0   39.90    7.10
  -5  34   0   30.00    6.60
  -6 -34   0   -2.80    4.00
   6 -34   0    4.70    3.30
   6 -34   0    6.30    3.90
  -6 -34   0    3.40    3.90
   6  34   0    2.00    4.20
  -6  34   0    2.60    2.10
   7 -34   0    8.40    3.80
  -7 -34   0    3.40    4.60
  -7 -34   0    4.30    4.80
   7  34   0   14.70    5.70
  -7  34   0    5.80    2.60
  -8 -34   0    3.10    5.60
   0 -35   0    5.60    3.70
   0  35   0    6.30    4.10
   1 -35   0    1.70    3.30
  -1 -35   0   -1.80    3.30
  -1  35   0    5.70    3.90
  -1  35   0    2.50    1.70
   1  35   0    0.40    3.40
  -2 -35   0    0.30    3.50
   2 -35   0    7.40    3.60
  -2  35   0    9.90    4.60
   2  35   0    6.00    4.00
  -3 -35   0    8.00    4.40
   3 -35   0    8.40    3.50
  -3  35   0   12.40    2.40
   3  35   0   10.40    4.60
  -3  35   0   12.90    5.10
   4 -35   0    5.70    3.20
  -4 -35   0    2.70    4.40
   4  35   0    4.40    4.30
  -4  35   0    5.40    4.70
  -4  35   0    8.10    2.30
  -5 -35   0   13.00    4.60
   5 -35   0   15.40    4.30
  -5  35   0   20.30    6.30
   5  35   0   12.70    5.10
   6 -35   0    8.90    3.50
  -6 -35   0    1.40    4.40
  -6 -35   0    1.80    4.40
   6 -35   0    4.90    3.60
   6  35   0    2.60    4.30
  -6  35   0    6.30    2.90
  -7 -35   0   -3.50    3.70
   7 -35   0    1.40    3.30
  -7 -35   0   -5.30    4.70
   7 -35   0    0.80    2.90
   7  35   0    0.20    4.40
  -7  35   0    0.80    2.50
   0 -36   0    4.30    3.90
   0  36   0    6.40    4.10
  -1 -36   0   29.00    5.60
   1 -36   0   25.30    5.10
   1  36   0   21.50    5.40
  -1  36   0   22.30    5.30
   2 -36   0   16.10    4.20
  -2 -36   0   16.60    5.20
   2  36   0   20.30    5.70
  -2  36   0   19.00    2.60
  -2  36   0   10.40    4.60
   3 -36   0    6.10    3.20
  -3 -36   0    1.70    3.80
   3  36   0    0.90    3.90
  -3  36   0    8.70    4.50
  -3  36   0    4.40    2.00
   4 -36   0   32.50    5.30
  -4 -36   0   24.70    6.10
   4  36   0   31.70    6.30
  -4  36   0   25.70    6.60
  -4  36   0   27.20    3.40
   5 -36   0    1.30    3.40
  -5 -36   0    9.00    4.50
  -5  36   0    0.80    4.40
  -5  36   0    0.90    2.30
   5  36   0    2.10    4.40
  -6 -36   0   -3.00    4.00
   6 -36   0   -1.00    2.60
   6 -36   0    1.40    3.70
   6  36   0    0.60    4.30
  -6  36   0    4.70    2.80
   7 -36   0    6.20    4.00
  -7 -36   0   -5.80    4.60
  -7  36   0    5.30    2.90
   7  36   0   -3.80    4.70
   0 -37   0   -1.90    3.30
   0  37   0    4.20    4.00
  -1 -37   0   11.80    5.00
   1 -37   0   16.10    4.50
  -1  37   0   20.50    5.50
   1  37   0   15.70    4.90
  -2 -37   0    7.90    4.50
   2 -37   0   11.50    4.40
  -2  37   0    6.60    2.10
  -2  37   0    7.30    4.50
   2  37   0    2.90    4.10
  -3 -37   0    3.90    4.20
   3 -37   0    8.50    3.60
   3  37   0   10.60    4.80
  -3  37   0    4.70    4.20
  -4 -37   0    5.30    4.70
   4 -37   0    8.50    3.90
  -4  37   0    6.50    2.40
   4  37   0   -5.40    3.50
  -4  37   0    2.30    4.80
  -5 -37   0    3.70    4.20
   5 -37   0   13.50    4.30
  -5  37   0    8.80    5.20
   5  37   0   13.40    5.70
  -6 -37   0   11.90    5.60
   6 -37   0   14.70    4.50
   6 -37   0   15.90    4.70
   6  37   0    9.30    5.00
  -6  37   0   12.70    3.10
   7 -37   0   10.60    4.60
   7 -37   0   17.40    4.70
   0 -38   0   23.40    5.10
   0  38   0   17.30    5.70
  -1 -38   0    5.60    4.10
   1 -38   0    5.00    3.70
  -1  38   0   12.80    4.90
   1  38   0   12.80    4.90
   2 -38   0    1.70    3.20
  -2 -38   0    1.60    4.10
   2  38   0    3.60    4.40
  -2  38   0    6.40    2.00
  -2  38   0   -1.00    4.30
  -3 -38   0   17.60    5.20
   3 -38   0   14.00    4.10
  -3  38   0   12.30    2.70
   3  38   0   13.40    5.10
  -3  38   0   10.50    5.30
  -4 -38   0   33.20    6.80
   4 -38   0   22.00    4.90
  -4  38   0   23.00    3.70
  -4  38   0   20.90    6.30
   4  38   0   27.30    6.50
  -5 -38   0   31.90    6.60
   5 -38   0   23.60    5.10
  -5  38   0   36.30    7.40
   5  38   0   28.30    6.70
  -6 -38   0   -6.00    3.80
   6 -38   0    4.60    3.60
   6 -38   0    1.60    4.00
  -6  38   0    1.40    2.40
   6  38   0    1.60    4.20
   7 -38   0    2.10    3.20
   0 -39   0   -0.20    3.50
   0  39   0    4.10    4.00
   1 -39   0   10.50    4.10
  -1 -39   0    8.60    5.00
  -1  39   0    6.50    4.80
   1  39   0   14.20    5.20
  -2 -39   0   27.80    6.40
   2 -39   0   26.60    5.30
   2  39   0   28.00    6.30
  -2  39   0   38.80    7.00
  -3 -39   0   46.40    7.50
   3 -39   0   30.20    5.40
  -3  39   0   44.10    4.00
  -3  39   0   28.80    6.70
   3  39   0   40.60    7.40
   4 -39   0    7.60    3.60
  -4 -39   0    5.50    5.00
   4  39   0    2.50    5.00
  -4  39   0    2.10    4.40
  -5 -39   0    4.20    4.80
   5 -39   0    4.20    3.70
  -5  39   0    5.00    2.90
   5  39   0    4.10    4.80
  -5  39   0   13.30    6.40
   6 -39   0   23.70    6.00
  -6 -39   0    6.80    5.30
   6 -39   0   13.90    4.70
   6  39   0   37.90    8.10
  -6  39   0   24.30    4.00
   0 -40   0    8.50    4.80
   0  40   0   13.30    5.20
  -1 -40   0    2.60    4.00
   1 -40   0    1.50    3.60
  -1  40   0    4.90    4.80
   1  40   0    5.40    5.00
   2 -40   0    7.40    4.00
  -2 -40   0    4.50    4.30
  -2  40   0    4.00    4.60
   2  40   0   17.70    5.60
  -3 -40   0    5.30    4.50
   3 -40   0    8.10    4.00
   3  40   0    7.60    4.90
  -3  40   0    3.10    4.40
   4 -40   0   35.60    5.90
  -4 -40   0   26.30    6.20
  -4  40   0   23.40    6.30
   4  40   0   37.10    7.80
  -5 -40   0   -2.40    4.10
   5 -40   0    1.10    3.10
  -5  40   0   -3.30    4.90
  -5  40   0    0.10    2.30
   5  40   0    2.10    4.30
  -6 -40   0   32.50    7.10
   6 -40   0   23.60    5.40
   6 -40   0   42.20    6.50
   0 -41   0   -1.20    3.50
   0  41   0    6.40    5.30
   1 -41   0    3.20    3.70
  -1 -41   0    2.10    4.50
   1  41   0    8.20    5.00
  -1  41   0    4.60    4.50
   2 -41   0    2.10    3.80
  -2 -41   0    3.90    4.50
   2  41   0    2.10    4.90
  -2  41   0    4.30    4.90
  -3 -41   0    5.30    4.50
   3 -41   0    5.60    3.60
  -3  41   0    1.30    2.00
   3  41   0    4.00    4.60
  -3  41   0   -1.50    4.00
  -4 -41   0    9.20    5.10
   4 -41   0   12.90    4.20
  -4  41   0    7.60    2.60
  -4  41   0    7.30    5.10
   4  41   0    4.10    5.40
  -5 -41   0   -5.90    4.00
   5 -41   0   -0.30    3.10
  -5  41   0    5.00    5.70
   5  41   0   -4.80    3.90
  -5  41   0   -3.80    2.10
   0 -42   0   15.30    5.10
   0  42   0   22.20    6.40
  -1 -42   0    6.20    4.40
   1 -42   0    2.70    3.90
   1  42   0    0.90    5.10
  -1  42   0    3.20    4.50
  -2 -42   0    3.00    4.90
   2 -42   0   -3.60    3.50
   2  42   0   -0.70    4.30
  -2  42   0   -1.60    4.50
  -3 -42   0   -0.60    4.40
   3 -42   0   -0.10    3.60
  -3  42   0   -6.50    4.20
   3  42   0   -4.80    4.00
   4 -42   0    0.10    3.10
  -4 -42   0   -2.10    4.10
  -4  42   0   -1.90    5.00
   4  42   0    5.10    5.90
  -5 -42   0   21.30    6.30
   5 -42   0   23.40    5.10
  -5  42   0   27.60    4.20
  -5  42   0   16.70    6.60
   0 -43   0    0.80    3.80
   0  43   0   -2.70    4.00
   1 -43   0    1.70    3.90
  -1 -43   0    3.60    4.20
  -1  43   0    1.20    4.40
   1  43   0   10.70    5.50
   2 -43   0    3.30    4.30
  -2 -43   0   -1.80    4.10
  -2  43   0    0.30    4.40
   2  43   0   -1.40    4.50
  -3 -43   0   16.00    6.20
   3 -43   0   18.00    5.10
   3  43   0   21.50    6.40
  -3  43   0    7.80    5.40
  -4 -43   0    0.40    4.40
   4 -43   0    4.00    3.50
  -4  43   0    5.20    2.90
   4  43   0   -6.00    5.00
  -4  43   0   -4.10    4.40
   0 -44   0    8.10    5.00
   0  44   0   10.00    5.90
   1 -44   0    7.80    4.40
  -1 -44   0    1.80    4.10
  -1  44   0    0.50    4.60
   1  44   0   -3.40    4.70
  -2 -44   0    2.80    5.10
   2 -44   0    9.80    4.40
  -2  44   0    8.80    5.40
   2  44   0   13.00    6.40
  -3 -44   0   -1.60    4.00
   3 -44   0   -2.10    3.30
  -3  44   0    0.30    5.30
   3  44   0    4.60    5.60
  -4 -44   0    2.30    5.20
  -4  44   0    4.20    2.60
  -4  44   0   -4.90    5.10
   0 -45   0   -1.30    3.90
   0  45   0    5.20    5.30
  -1 -45   0   -3.90    4.10
   1 -45   0    2.40    3.80
  -1  45   0    7.40    5.20
   1  45   0    5.30    5.20
  -2 -45   0   -5.40    3.90
   2 -45   0    5.00    4.10
  -2  45   0    6.00    5.30
   2  45   0   -2.60    4.60
  -3  45   0   11.10    6.00
   0  46   0   28.50    7.10
   1  46   0    5.80    6.00
  -1  46   0   14.00    6.00
  -2  46   0   -0.30    4.80
  11   0  -1   -0.80    3.20
 -11   0   1   -1.10    3.80
 -10   0   1   -1.70    2.90
  10   0  -1    0.10    2.90
   9   0  -1   42.10    4.80
  -9   0   1   38.30    4.50
  -8   0   1   -1.70    1.60
   8   0  -1    0.40    2.10
   8   0  -1   -0.70    2.00
   7   0  -1    1.20    1.80
  -7   0   1   -0.60    1.30
   7   0  -1    1.40    1.80
  -7   0   1    0.70    1.00
  -6   0   1   82.29    4.00
  -6   0   1   79.09    3.20
   6   0  -1   77.79    4.20
   6   0  -1   78.39    4.40
  -5   0   1    4.90    1.20
   5   0  -1    3.70    1.40
  -5   0   1    5.20    0.90
   5   0  -1    2.10    1.20
   4   0  -1  525.75   14.70
  -4   0   1  538.85   13.80
  -4   0   1  541.55   14.50
   4   0  -1  535.15   14.90
   3   0  -1    2.80    0.90
  -3   0   1    5.80    0.90
   3   0  -1    4.80    0.90
  -3   0   1    4.40    0.60
   2   0  -1   14.80    1.30
   2   0  -1   14.10    1.10
  -2   0   1   18.70    0.90
  -2   0   1   12.50    1.10
  -1   0   1  648.44   16.60
   1   0  -1  714.03   16.70
  -1   0   1  621.04   16.30
  -1   0  -1 1059.19   26.80
   1   0   1 1059.79   26.40
  -1   0  -1 1061.19   26.30
  -2   0  -1 1872.31   46.60
   2   0   1 1929.51   47.10
   2   0   1 1915.31   46.40
  -2   0  -1 1884.91   47.40
   3   0   1   21.50    1.40
   3   0   1   19.20    1.70
  -3   0  -1   18.90    1.30
  -3   0  -1   26.30    2.10
   4   0   1   89.29    3.50
  -4   0  -1   84.09    3.20
   4   0   1   76.79    3.80
  -4   0  -1   83.49    4.00
   5   0   1   16.80    1.90
   5   0   1   22.90    2.40
  -5   0  -1   19.20    2.50
  -5   0  -1   21.60    1.70
   6   0   1   37.00    3.00
  -6   0  -1   38.40    3.50
   6   0   1   38.10    3.30
  -6   0  -1   41.50    2.60
  -7   0  -1   14.60    3.10
   7   0   1   18.30    3.10
  -7   0  -1   23.40    2.50
   8   0   1    6.40    2.60
  -8   0  -1    3.50    2.70
  -8   0  -1    6.30    2.00
  -9   0  -1   11.00    3.60
   9   0   1   17.00    3.60
  10   0   1    3.20    3.40
 -10   0  -1   -0.30    3.80
  11   0   1    3.40    3.80
 -11   0  -1   -0.20    4.20
 -11  -1   1    3.00    3.70
  11  -1  -1    2.40    3.40
 -11   1   1    0.80    3.80
  11   1  -1   -6.30    2.60
  10  -1  -1   73.59    6.50
 -10  -1   1   75.59    6.30
 -10   1   1   63.09    5.80
  10   1  -1   71.39    6.40
   9  -1  -1   50.89    4.70
  -9  -1   1   43.90    4.80
   9   1  -1   43.70    4.60
  -9   1   1   47.70    4.80
   8  -1  -1   49.50    4.50
   8  -1  -1   48.90    4.50
  -8  -1   1   45.70    4.00
  -8   1   1   48.30    4.20
   8   1  -1   45.80    4.70
  -8   1   1   48.80    3.10
   8   1  -1   41.60    4.40
  -7  -1   1   -0.40    0.90
   7  -1  -1    2.30    1.90
   7  -1  -1   -3.00    1.20
  -7  -1   1    2.10    1.50
   7   1  -1   -0.60    1.40
  -7   1   1    2.20    1.10
  -7   1   1   -0.10    1.30
   7   1  -1   -1.00    1.60
  -6  -1   1  138.49    5.50
  -6  -1   1  140.29    4.80
   6  -1  -1  144.29    6.00
   6  -1  -1  139.99    6.00
  -6   1   1  141.89    5.60
  -6   1   1  133.79    4.70
   6   1  -1  143.09    6.10
   6   1  -1  142.89    6.20
  -5  -1   1  100.59    4.10
   5  -1  -1  106.69    4.70
  -5  -1   1   95.49    3.40
   5  -1  -1   90.09    4.30
  -5   1   1   94.99    4.00
   5   1  -1   89.99    4.50
  -5   1   1   98.49    3.40
   5   1  -1   95.29    4.40
   4  -1  -1  193.48    6.30
  -4  -1   1  189.68    5.40
  -4  -1   1  193.58    6.10
   4  -1  -1  187.58    6.50
   4   1  -1  195.48    6.60
   4   1  -1  191.68    6.40
  -4   1   1  193.68    5.60
  -4   1   1  192.48    6.10
  -3  -1   1  686.13   17.70
   3  -1  -1  685.93   17.80
  -3  -1   1  686.33   17.10
   3  -1  -1  685.43   18.10
   3   1  -1  681.83   18.10
  -3   1   1  687.53   17.60
  -3   1   1  683.73   17.10
   3   1  -1  672.33   17.80
  -2  -1   1  121.99    3.30
   2  -1  -1  111.29    3.50
   2  -1  -1  113.79    3.90
  -2  -1   1  121.29    3.70
   2   1  -1  106.79    3.50
  -2   1   1  110.39    3.20
   2   1  -1  113.69    3.80
  -2   1   1  115.69    3.50
  -1  -1   1 2051.89   54.69
  -1  -1   1 2218.48   55.09
   1  -1  -1 2316.57   55.19
   1  -1  -1 2431.86   55.19
   1   1  -1 2387.66   56.79
  -1   1   1 2230.18   56.49
   1   1  -1 2354.06   56.89
   0   1   1 1930.81   49.40
   0   1  -1 2062.89   49.60
   0   1  -1 2076.39   49.30
  -1  -1  -1 2604.24   65.19
   1  -1   1 2703.93   64.89
  -1  -1  -1 2651.14   64.59
  -1   1  -1 2593.04   63.69
   1   1   1 2521.25   63.29
  -1   1  -1 2664.83   63.19
  -2  -1  -1 1223.98   31.00
  -2  -1  -1 1271.77   31.80
   2  -1   1 1255.47   30.80
   2  -1   1 1264.47   31.50
   2   1   1 1276.47   30.80
  -2   1  -1 1268.47   31.70
  -2   1  -1 1220.78   30.90
   2   1   1 1230.88   31.40
  -3  -1  -1  294.67    8.20
   3  -1   1  309.07    8.20
   3  -1   1  300.47    8.90
  -3  -1  -1  290.27    9.00
  -3   1  -1  308.77    9.20
   3   1   1  308.47    8.40
  -3   1  -1  307.17    8.40
   3   1   1  296.07    9.00
   4  -1   1   46.70    2.50
  -4  -1  -1   55.79    3.30
  -4  -1  -1   50.79    2.40
   4  -1   1   45.80    3.00
   4   1   1   48.60    2.60
  -4   1  -1   49.80    2.40
  -4   1  -1   53.09    3.20
   4   1   1   48.10    3.00
   5  -1   1   88.09    3.80
   5  -1   1   96.59    4.50
  -5  -1  -1   80.59    4.50
  -5  -1  -1   82.39    3.50
   5   1   1   85.69    4.30
  -5   1  -1   77.79    3.40
   5   1   1   84.99    3.90
  -5   1  -1   87.29    4.40
   6  -1   1   31.90    2.80
  -6  -1  -1   34.00    2.40
  -6  -1  -1   32.90    3.60
   6  -1   1   36.70    3.20
   6   1   1   33.00    3.30
  -6   1  -1   31.90    3.20
   6   1   1   34.00    2.90
  -6   1  -1   32.90    2.40
   7  -1   1   28.00    3.60
  -7  -1  -1   40.20    4.50
  -7  -1  -1   38.80    2.90
  -7   1  -1   31.40    2.70
   7   1   1   36.10    4.00
  -7   1  -1   36.60    4.00
  -8  -1  -1   11.90    3.60
   8  -1   1   13.70    3.10
  -8   1  -1    9.20    3.40
   8   1   1    9.50    2.80
  -8   1  -1   15.70    2.40
   9  -1   1  110.89    7.00
  -9  -1  -1   93.59    7.60
  -9   1  -1   77.29    6.70
   9   1   1  106.49    6.90
  10  -1   1   13.90    3.70
 -10  -1  -1    4.50    3.80
 -10   1  -1   12.50    4.60
  10   1   1    6.50    3.70
 -11  -1  -1    8.60    4.60
  11  -1   1    2.80    3.30
  11   1   1    5.40    3.60
 -11   1  -1    5.60    4.70
 -11  -2   1   -1.70    3.90
 -11   2   1   -4.80    3.40
  11   2  -1   -2.00    3.20
  10  -2  -1    6.50    3.10
 -10  -2   1    5.60    3.10
  10   2  -1   11.20    3.80
 -10   2   1   10.50    3.80
  -9  -2   1    4.00    2.80
   9  -2  -1    9.20    2.90
   9   2  -1    3.90    2.40
  -9   2   1    8.50    3.00
   8  -2  -1   -2.20    1.50
   8  -2  -1   -2.50    1.80
  -8  -2   1    0.10    1.80
  -8   2   1    1.80    1.40
   8   2  -1   -1.00    1.80
   8   2  -1    0.70    2.20
  -8   2   1    3.40    2.10
   7  -2  -1   22.50    2.90
   7  -2  -1   20.50    2.90
  -7  -2   1   25.80    2.80
  -7  -2   1   25.60    2.10
  -7   2   1   22.50    2.10
   7   2  -1   24.40    3.20
  -7   2   1   21.80    2.70
   7   2  -1   22.70    3.20
  -6  -2   1   43.60    3.00
   6  -2  -1   38.30    3.30
  -6  -2   1   40.40    2.20
   6  -2  -1   41.00    3.30
   6   2  -1   42.20    3.40
  -6   2   1   39.00    2.80
   6   2  -1   42.30    3.60
  -6   2   1   40.60    2.30
   5  -2  -1  815.92   22.50
   5  -2  -1  807.92   22.30
  -5  -2   1  844.72   22.20
  -5  -2   1  848.42   21.10
  -5   2   1  821.92   21.30
   5   2  -1  853.91   22.90
   5   2  -1  809.92   22.60
  -5   2   1  857.01   22.10
  -4  -2   1    2.60    0.90
   4  -2  -1    0.30    0.90
   4  -2  -1    2.30    1.00
  -4  -2   1    4.30    0.70
   4   2  -1    0.10    0.90
  -4   2   1    2.60    0.70
  -4   2   1    4.30    1.00
   4   2  -1    2.20    1.10
  -3  -2   1  921.01   22.40
   3  -2  -1  907.31   23.20
  -3  -2   1  899.41   23.20
   3  -2  -1  905.61   23.50
   3   2  -1  905.71   23.80
   3   2  -1  937.51   24.10
  -3   2   1  948.91   23.20
  -3   2   1  918.81   23.40
   2  -2  -1 2023.40   49.90
  -2  -2   1 2057.19   49.50
  -2  -2   1 2037.20   49.99
   2  -2  -1 2026.80   50.29
  -2   2   1 2032.40   50.59
  -2   2   1 2052.79   50.39
   2   2  -1 2110.29   51.19
   2   2  -1 2064.69   50.79
   1  -2  -1 1393.76   34.70
  -1  -2   1 1408.96   34.70
   1  -2  -1 1420.56   34.80
  -1   2   1 1434.06   35.90
   1   2  -1 1486.25   36.10
   1   2  -1 1476.95   36.30
   0  -2  -1 2408.86   59.99
   0   2  -1 2349.86   59.39
   0   2  -1 2490.55   59.89
   0   2  -1 2491.45   59.59
   0   2   1 2388.56   59.29
   0   2  -1 2455.95   59.39
  -1  -2  -1  381.56    9.90
   1  -2   1  365.26   10.10
  -1  -2  -1  402.36   10.50
  -1   2  -1  377.56   10.00
  -1   2  -1  372.36    9.50
   1   2   1  362.66    9.70
  -2  -2  -1  697.53   18.20
   2  -2   1  687.13   17.20
  -2  -2  -1  697.33   17.40
   2  -2   1  663.03   17.80
   2   2   1  704.13   17.30
  -2   2  -1  690.83   18.00
  -2   2  -1  666.23   17.20
   2   2   1  667.53   17.70
   3  -2   1  541.85   13.80
  -3  -2  -1  530.55   14.80
   3  -2   1  527.35   14.50
  -3  -2  -1  516.45   13.80
  -3   2  -1  535.75   14.60
  -3   2  -1  514.65   13.80
   3   2   1  528.15   14.50
   3   2   1  533.75   13.90
   4  -2   1 1077.09   28.00
   4  -2   1 1081.19   27.10
  -4  -2  -1 1057.19   28.20
  -4  -2  -1 1036.40   26.90
   4   2   1 1074.39   27.90
   4   2   1 1069.89   27.20
  -4   2  -1 1040.30   26.90
  -4   2  -1 1049.49   27.90
  -5  -2  -1  498.65   15.60
   5  -2   1  524.95   15.40
  -5  -2  -1  528.05   14.20
   5  -2   1  537.65   14.60
   5   2   1  519.15   15.40
   5   2   1  537.65   14.70
  -5   2  -1  509.45   15.40
  -5   2  -1  510.55   14.20
  -6  -2  -1   37.20    3.50
  -6  -2  -1   31.10    2.30
   6  -2   1   31.90    2.60
   6  -2   1   32.20    3.10
  -6   2  -1   33.70    3.30
  -6   2  -1   35.40    2.50
   6   2   1   40.00    3.40
   6   2   1   33.60    2.90
  -7  -2  -1    3.30    2.30
   7  -2   1   -2.20    1.70
  -7  -2  -1   -0.30    1.30
  -7   2  -1    0.00    2.00
  -7   2  -1   -1.00    1.30
   7   2   1    0.60    2.00
  -8  -2  -1   72.89    5.90
   8  -2   1   82.49    5.60
  -8   2  -1   75.79    6.10
   8   2   1   84.09    5.80
  -8   2  -1   81.69    4.50
  -9  -2  -1   25.40    4.70
   9  -2   1   40.30    4.90
   9   2   1   39.30    4.90
  -9   2  -1   27.70    4.90
 -10  -2  -1   39.80    6.40
  10  -2   1   46.30    5.60
  10   2   1   34.50    5.30
 -10   2  -1   37.60    6.00
  11  -2   1   15.10    4.50
 -11  -2  -1   16.00    5.60
  11   2   1   12.40    4.50
 -11  -3   1   19.00    4.80
  11   3  -1   22.30    4.80
  10  -3  -1   28.70    4.60
 -10  -3   1   31.10    4.80
  10   3  -1   27.60    4.90
 -10   3   1   26.60    4.40
   9  -3  -1   15.20    3.40
  -9  -3   1   18.50    3.50
   9   3  -1   12.40    3.40
  -9   3   1   10.40    3.10
  -8  -3   1    8.20    2.40
   8  -3  -1    5.90    2.10
   8  -3  -1    7.10    2.50
   8   3  -1    5.50    2.60
  -8   3   1    8.50    2.30
   8   3  -1    4.80    2.30
  -7  -3   1    8.30    2.00
  -7  -3   1    8.00    1.40
   7  -3  -1    8.30    2.10
   7  -3  -1    7.30    2.20
   7   3  -1    7.80    2.20
  -7   3   1    6.80    1.40
   7   3  -1    6.70    2.10
  -7   3   1    8.00    1.90
  -6  -3   1   99.79    3.70
   6  -3  -1  103.19    5.00
   6  -3  -1  103.19    4.90
  -6  -3   1  100.29    4.60
   6   3  -1   99.79    5.30
   6   3  -1   96.99    5.10
  -6   3   1   99.69    3.90
  -6   3   1  107.99    4.60
  -5  -3   1  116.09    3.80
  -5  -3   1  114.29    4.60
   5  -3  -1  120.59    5.10
   5  -3  -1  116.09    4.90
  -5   3   1  122.39    4.50
   5   3  -1  113.19    4.90
   5   3  -1  117.39    5.30
  -5   3   1  108.69    3.90
  -4  -3   1   89.49    3.60
   4  -3  -1   84.69    3.70
   4  -3  -1   86.39    3.90
  -4  -3   1   91.99    2.80
   4   3  -1   91.39    4.20
  -4   3   1   90.39    3.10
   4   3  -1   87.09    3.90
  -4   3   1   92.59    3.50
  -3  -3   1  423.16   11.50
  -3  -3   1  430.16   10.70
   3  -3  -1  431.56   11.50
   3  -3  -1  415.66   11.80
  -3   3   1  432.76   11.10
   3   3  -1  415.46   11.70
  -3   3   1  423.56   11.30
   3   3  -1  425.46   12.00
   2  -3  -1 1693.83   41.70
  -2  -3   1 1703.33   41.20
   2  -3  -1 1702.03   42.10
  -2  -3   1 1674.93   41.80
  -2   3   1 1665.63   41.40
   2   3  -1 1688.63   42.00
   2   3  -1 1692.23   41.70
  -2   3   1 1685.53   41.30
   1  -3  -1  569.04   14.50
  -1  -3   1  557.04   14.40
   1  -3  -1  570.24   14.40
   1   3  -1  581.04   14.80
  -1   3   1  572.44   14.50
   1   3  -1  580.34   15.00
  -1   3   1  568.34   14.60
   0  -3  -1 1023.50   28.70
   0  -3  -1 1278.87   28.50
   0   3  -1 1296.27   32.30
   0   3  -1 1239.78   32.20
   0   3  -1 1323.07   32.00
   0   3  -1 1338.37   32.50
   0   3   1 1327.27   32.10
  -1  -3  -1  639.04   15.90
  -1  -3  -1  627.34   16.00
  -1  -3  -1  635.64   16.60
   1  -3   1  639.04   16.00
   1  -3   1  631.14   16.30
   1   3   1  637.24   16.10
  -1   3  -1  623.24   16.20
  -1   3  -1  637.04   15.90
   2  -3   1  211.58    6.50
  -2  -3  -1  226.68    6.80
   2  -3   1  207.88    5.90
  -2  -3  -1  216.38    6.00
   2   3   1  216.88    6.10
  -2   3  -1  216.48    6.60
   2   3   1  210.58    6.40
  -2   3  -1  212.68    6.00
   3  -3   1  532.15   14.60
  -3  -3  -1  524.45   13.90
  -3  -3  -1  541.35   14.90
   3  -3   1  539.45   14.00
  -3   3  -1  532.85   14.70
   3   3   1  543.95   14.20
  -3   3  -1  523.05   14.00
   3   3   1  539.15   14.70
  -4  -3  -1    2.70    1.30
   4  -3   1   -1.10    0.70
   4  -3   1    1.70    1.20
  -4  -3  -1    0.60    0.70
   4   3   1    3.90    1.30
   4   3   1    2.00    1.30
  -4   3  -1   -1.70    0.90
  -4   3  -1    1.40    0.80
   5  -3   1   34.90    2.40
  -5  -3  -1   37.00    3.10
   5  -3   1   37.60    2.90
  -5  -3  -1   36.20    2.20
   5   3   1   34.00    2.70
  -5   3  -1   31.00    2.80
  -5   3  -1   37.30    2.30
   5   3   1   41.20    3.10
   6  -3   1   16.90    2.40
  -6  -3  -1   14.40    1.80
  -6  -3  -1   10.40    2.60
   6  -3   1   14.20    2.00
   6   3   1   16.80    2.60
   6   3   1   16.30    2.30
  -6   3  -1   14.60    1.90
  -6   3  -1   13.30    2.50
  -7  -3  -1  100.09    6.20
   7  -3   1  104.79    5.80
  -7  -3  -1  109.39    4.80
  -7   3  -1  102.49    6.10
   7   3   1  113.29    6.30
  -7   3  -1  111.19    5.00
  -8  -3  -1   18.70    4.00
   8  -3   1   19.60    3.40
  -8   3  -1   28.40    4.30
  -8   3  -1   25.20    2.90
   8   3   1   20.50    3.60
   9  -3   1   73.19    6.00
  -9  -3  -1   66.19    7.10
  -9   3  -1   54.19    6.10
   9   3   1   51.09    5.60
  10  -3   1   11.00    3.50
 -10  -3  -1   11.30    4.30
  10   3   1   13.30    4.00
 -10   3  -1   12.60    4.30
  11  -3   1   -0.10    3.10
 -11  -3  -1   -0.50    4.00
  11   3   1    0.50    3.40
 -11  -4   1   23.90    5.20
  11   4  -1   19.10    4.30
  10  -4  -1   21.10    3.90
 -10  -4   1   13.40    4.20
  10   4  -1   19.30    4.50
 -10   4   1   15.60    3.80
  -9  -4   1    9.10    3.00
   9  -4  -1   13.80    3.10
   9   4  -1   10.70    3.10
  -9   4   1   12.80    2.90
   8  -4  -1   24.20    3.40
   8  -4  -1   20.70    3.10
  -8  -4   1   27.50    3.50
  -8   4   1   26.80    2.70
   8   4  -1   26.40    3.80
  -8   4   1   24.70    3.10
   8   4  -1   34.90    4.20
  -7  -4   1    1.80    1.60
   7  -4  -1    3.30    1.70
   7  -4  -1    4.90    2.00
  -7   4   1    4.80    1.30
   7   4  -1    6.60    2.10
   7   4  -1    6.00    2.30
  -7   4   1    6.10    1.80
   6  -4  -1   33.70    2.90
  -6  -4   1   31.80    2.70
   6  -4  -1   28.90    2.70
  -6  -4   1   34.10    1.90
   6   4  -1   31.60    3.20
   6   4  -1   36.40    3.50
  -6   4   1   33.30    2.20
  -6   4   1   40.10    2.60
   5  -4  -1  373.96   11.30
  -5  -4   1  389.36   11.30
   5  -4  -1  378.46   11.60
  -5  -4   1  372.66   10.10
   5   4  -1  362.56   11.70
  -5   4   1  371.86   10.70
  -5   4   1  369.76   10.20
   5   4  -1  370.66   11.40
   4  -4  -1  286.07    8.60
  -4  -4   1  283.67    8.60
   4  -4  -1  281.87    8.90
  -4  -4   1  293.37    7.60
  -4   4   1  284.77    8.20
   4   4  -1  273.87    8.80
   4   4  -1  286.77    9.10
  -4   4   1  288.07    7.90
  -3  -4   1   24.50    1.60
  -3  -4   1   26.20    1.00
   3  -4  -1   19.00    1.60
   3  -4  -1   22.50    1.50
  -3   4   1   21.80    1.20
  -3   4   1   24.50    1.40
   3   4  -1   24.20    1.90
   3   4  -1   21.30    2.10
  -2  -4   1 1439.56   35.90
  -2  -4   1 1446.96   35.10
   2  -4  -1 1462.85   36.20
   2  -4  -1 1437.86   35.80
  -2   4   1 1458.45   36.30
   2   4  -1 1490.55   36.90
   2   4  -1 1486.95   37.10
  -2   4   1 1460.45   36.30
  -1  -4   1   80.39    2.60
   1  -4  -1   78.49    2.70
   1  -4  -1   78.99    2.80
   1   4  -1   83.09    3.00
  -1   4   1   75.99    2.80
  -1   4   1   80.89    2.50
   1   4  -1   79.89    3.10
   0  -4  -1  355.96    9.30
   0  -4  -1  341.47    9.30
   0   4  -1  375.26    9.80
   0   4   1  359.06    9.40
   0   4  -1  352.16    9.00
   0   4   1  359.46    9.20
   0   4  -1  342.67    9.30
   0   4  -1  358.66    9.60
   1  -4   1 2111.69   52.69
   1  -4   1 2165.68   52.49
  -1  -4  -1 2149.88   52.39
  -1  -4  -1 2118.79   52.89
   1   4   1 2158.98   52.19
  -1   4  -1 2163.78   52.99
  -1   4  -1 2127.69   51.79
  -1   4  -1 2070.39   52.09
   1   4   1 2084.79   51.89
   2  -4   1  988.20   25.90
   2  -4   1 1008.30   25.30
  -2  -4  -1 1033.40   25.30
  -2  -4  -1 1019.10   26.20
  -2   4  -1 1024.20   25.40
   2   4   1 1014.80   25.60
   2   4   1  991.90   25.90
  -2   4  -1 1028.10   25.90
   3  -4   1  275.77    7.70
  -3  -4  -1  278.07    8.60
   3  -4   1  264.97    8.30
  -3  -4  -1  279.07    7.60
  -3   4  -1  278.67    7.80
   3   4   1  267.17    8.50
   3   4   1  286.77    8.20
  -3   4  -1  277.57    8.40
   4  -4   1  129.59    5.30
   4  -4   1  139.29    4.70
  -4  -4  -1  135.89    4.50
  -4  -4  -1  143.79    5.70
   4   4   1  136.59    5.10
  -4   4  -1  139.09    5.40
   4   4   1  137.39    5.50
  -4   4  -1  145.19    4.80
  -5  -4  -1   46.20    2.50
   5  -4   1   47.60    2.70
  -5  -4  -1   44.60    3.40
   5  -4   1   45.50    3.30
   5   4   1   43.90    3.10
  -5   4  -1   49.40    2.70
   5   4   1   48.60    3.40
  -5   4  -1   48.20    3.50
   6  -4   1   30.80    3.30
   6  -4   1   26.70    2.40
  -6  -4  -1   30.40    3.40
  -6  -4  -1   25.30    2.20
   6   4   1   32.40    3.40
   6   4   1   28.40    2.90
  -6   4  -1   24.40    2.10
  -6   4  -1   22.50    3.00
  -7  -4  -1   64.39    5.40
   7  -4   1   68.89    4.70
  -7  -4  -1   59.49    3.50
  -7   4  -1   64.59    3.80
   7   4   1   68.99    5.10
  -7   4  -1   61.09    4.80
  -8  -4  -1   11.00    3.40
   8  -4   1   12.60    3.10
  -8   4  -1   15.20    2.50
  -8   4  -1   10.80    3.40
   8   4   1   13.60    3.20
   9  -4   1   54.19    5.40
  -9  -4  -1   40.80    5.60
   9   4   1   49.40    5.80
  -9   4  -1   44.10    5.90
  -9   4  -1   47.40    4.00
  10  -4   1    2.20    3.10
 -10  -4  -1    1.70    3.70
  10   4   1    1.90    3.10
 -11  -4  -1    2.30    5.00
  11  -4   1    4.50    3.80
  11   4   1    0.50    3.80
 -11  -5   1   15.80    4.90
  11   5  -1   35.80    5.80
 -10  -5   1   78.49    7.10
  10  -5  -1   96.49    6.60
  10   5  -1   93.89    7.40
  -9  -5   1   20.90    3.70
   9  -5  -1   20.90    3.50
   9   5  -1   22.00    3.90
  -9   5   1   24.30    2.80
  -9   5   1   20.60    3.70
  -8  -5   1   66.79    4.80
   8  -5  -1   65.99    5.00
   8  -5  -1   64.69    4.90
  -8   5   1   59.99    3.70
  -8   5   1   61.19    4.40
   8   5  -1   56.49    5.10
   8   5  -1   55.89    5.10
   7  -5  -1   85.89    4.90
  -7  -5   1   81.19    4.70
   7  -5  -1   78.19    4.80
   7   5  -1   82.99    5.40
  -7   5   1   88.39    4.40
   7   5  -1   85.49    5.30
  -7   5   1   77.49    3.80
  -6  -5   1  157.08    4.90
   6  -5  -1  147.19    6.00
  -6  -5   1  140.69    5.90
   6  -5  -1  150.68    6.30
  -6   5   1  158.78    5.80
   6   5  -1  143.89    6.50
  -6   5   1  154.78    5.20
   6   5  -1  146.49    6.70
   5  -5  -1  275.77    8.90
  -5  -5   1  290.77    7.80
  -5  -5   1  267.97    8.80
   5  -5  -1  288.17    9.20
   5   5  -1  295.97   10.00
  -5   5   1  292.97    8.50
  -5   5   1  311.37    8.90
   5   5  -1  280.47    9.70
   4  -5  -1  101.89    4.20
  -4  -5   1  108.29    3.20
  -4  -5   1  109.09    4.10
   4  -5  -1  106.09    4.40
  -4   5   1  106.99    3.80
   4   5  -1  107.59    4.70
   4   5  -1  102.59    4.40
  -4   5   1  102.79    3.50
  -3  -5   1  532.05   13.30
  -3  -5   1  533.35   14.30
   3  -5  -1  532.55   14.60
   3  -5  -1  542.45   14.30
  -3   5   1  539.55   13.90
   3   5  -1  536.55   15.00
   3   5  -1  533.65   14.70
  -3   5   1  539.05   13.90
   2  -5  -1  358.76    9.70
  -2  -5   1  363.56    9.70
   2  -5  -1  351.16   10.00
  -2   5   1  360.06    9.50
   2   5  -1  358.86   10.20
   2   5  -1  360.36   10.40
  -2   5   1  365.36    9.50
   1  -5  -1  286.57    7.90
   1  -5  -1  272.07    7.50
  -1  -5   1  283.27    7.50
  -1   5   1  289.67    8.00
  -1   5   1  278.77    7.60
   1   5  -1  281.97    8.30
   1   5  -1  295.57    8.30
   0  -5  -1 1053.39   26.40
   0  -5  -1 1050.29   26.40
   0   5  -1 1119.19   27.40
   0   5  -1 1067.19   26.60
   0   5   1 1085.89   26.90
   0   5   1 1076.19   26.60
   0   5  -1 1018.10   27.10
   0   5  -1 1081.39   26.40
  -1  -5  -1  584.64   15.60
  -1  -5  -1  590.14   15.20
   1  -5   1  581.24   15.30
  -1   5  -1  586.94   15.90
   1   5   1  593.94   15.20
  -1   5  -1  592.34   14.70
  -1   5  -1  549.45   14.80
   1   5   1  577.24   14.70
   2  -5   1   30.50    1.70
  -2  -5  -1   34.00    1.70
  -2  -5  -1   38.00    2.30
   2  -5   1   30.70    2.00
  -2   5  -1   34.10    2.20
  -2   5  -1   33.00    1.60
   2   5   1   36.20    2.10
   3  -5   1   44.20    2.60
  -3  -5  -1   43.70    2.00
  -3  -5  -1   43.70    2.70
   3  -5   1   43.00    2.10
   3   5   1   42.40    2.50
  -3   5  -1   47.50    2.70
  -3   5  -1   48.80    2.10
   3   5   1   44.80    2.60
   4  -5   1  183.08    6.00
   4  -5   1  189.48    6.70
  -4  -5  -1  191.68    7.00
  -4  -5  -1  186.68    5.80
  -4   5  -1  181.48    5.90
  -4   5  -1  193.38    6.60
   4   5   1  182.18    6.80
   4   5   1  187.98    6.40
   5  -5   1   15.20    1.80
  -5  -5  -1   18.70    2.60
  -5  -5  -1   19.30    1.70
   5  -5   1   18.30    2.30
  -5   5  -1   20.00    2.50
  -5   5  -1   19.00    1.90
   5   5   1   20.20    2.30
   5   5   1   19.50    2.50
  -6  -5  -1  255.57    8.10
   6  -5   1  260.87    9.40
   6  -5   1  261.67    8.50
  -6  -5  -1  252.57    9.80
   6   5   1  247.58    9.40
   6   5   1  267.67    9.10
  -6   5  -1  254.47    8.30
  -6   5  -1  253.07    9.50
   7  -5   1   34.80    3.80
  -7  -5  -1   34.00    4.30
  -7   5  -1   30.80    3.90
   7   5   1   35.20    4.10
  -7   5  -1   34.00    2.80
   8  -5   1    4.40    2.40
  -8  -5  -1    0.20    2.70
  -8   5  -1    3.90    2.90
  -8   5  -1    1.10    1.60
   8   5   1    1.30    2.40
   9  -5   1   44.00    5.20
  -9  -5  -1   28.60    5.10
  -9   5  -1   38.60    5.40
  -9   5  -1   41.70    4.00
   9   5   1   38.20    5.20
 -10  -5  -1   19.40    5.40
  10  -5   1   29.50    4.50
  10   5   1   21.80    4.60
  11  -5   1   11.40    4.10
 -11  -5  -1    4.80    4.70
  11   5   1    9.60    4.30
 -11  -6   1    0.20    3.70
  11   6  -1   12.00    4.30
  10  -6  -1   70.59    5.80
 -10  -6   1   64.59    6.70
  10   6  -1   66.09    6.60
  -9  -6   1   16.10    3.60
   9  -6  -1   15.10    3.30
   9   6  -1    8.90    3.30
  -9   6   1    7.90    2.20
  -9   6   1    8.60    2.90
   8  -6  -1    2.50    2.10
  -8  -6   1    7.30    2.50
   8  -6  -1    8.20    2.50
   8   6  -1    8.30    2.70
  -8   6   1    4.20    2.10
  -8   6   1    4.20    1.70
   8   6  -1    4.60    2.50
   7  -6  -1   10.10    2.30
   7  -6  -1   13.10    2.40
  -7  -6   1    9.70    2.30
   7   6  -1   12.10    2.70
  -7   6   1    8.20    1.50
  -7   6   1    9.70    1.90
   7   6  -1   14.90    3.00
   6  -6  -1   57.29    3.80
  -6  -6   1   62.09    3.60
   6  -6  -1   59.79    3.60
  -6  -6   1   51.79    2.50
   6   6  -1   56.39    4.30
   6   6  -1   66.69    4.30
  -6   6   1   57.79    3.20
  -6   6   1   53.39    2.90
  -5  -6   1  485.75   13.80
   5  -6  -1  466.35   14.00
  -5  -6   1  477.05   12.40
   5  -6  -1  475.45   13.80
   5   6  -1  470.65   14.20
  -5   6   1  462.85   12.80
  -5   6   1  484.25   13.10
   5   6  -1  467.85   14.40
  -4  -6   1  126.29    4.70
  -4  -6   1  127.99    3.70
   4  -6  -1  128.99    5.00
   4  -6  -1  130.39    4.80
  -4   6   1  125.19    4.20
  -4   6   1  125.29    4.10
   4   6  -1  127.39    5.20
   4   6  -1  124.39    5.30
   3  -6  -1   53.69    2.60
   3  -6  -1   49.10    2.60
  -3  -6   1   53.19    1.60
  -3  -6   1   55.99    2.50
   3   6  -1   55.39    2.90
  -3   6   1   58.59    2.20
   3   6  -1   55.49    3.20
  -3   6   1   58.79    2.30
   2  -6  -1 1071.89   26.60
   2  -6  -1 1026.30   26.90
  -2  -6   1 1059.39   26.50
  -2   6   1 1072.69   26.70
   2   6  -1 1100.39   27.70
   2   6  -1 1074.79   27.80
  -2   6   1 1053.19   26.60
  -1  -6   1 1792.22   43.50
   1  -6  -1 1790.82   44.10
   1  -6  -1 1736.43   43.60
  -1   6   1 1863.01   45.70
   1   6  -1 1840.42   46.00
  -1   6   1 1794.52   45.00
   1   6  -1 1849.02   46.00
   0  -6   1  444.06   12.00
   0  -6  -1  440.66   11.80
   0  -6  -1  443.86   12.00
   0   6   1  470.85   12.50
   0   6  -1  482.35   13.00
   0   6  -1  462.25   11.80
   0   6   1  454.55   12.00
   0   6  -1  473.65   12.00
  -1  -6  -1  372.76   10.30
   1  -6   1  370.46   10.30
   1   6   1  362.56   10.00
  -1   6  -1  364.26    9.30
  -1   6  -1  343.67    9.30
  -1   6  -1  352.06   10.60
   1   6   1  355.26    9.30
  -2  -6  -1 1352.76   33.50
   2  -6   1 1360.86   33.80
  -2  -6  -1 1333.67   34.40
   2  -6   1 1349.27   34.30
   2   6   1 1326.07   33.70
   2   6   1 1346.67   33.80
  -2   6  -1 1328.07   33.40
  -2   6  -1 1325.47   33.10
   3  -6   1  591.34   15.70
  -3  -6  -1  603.34   15.40
  -3  -6  -1  590.14   16.50
   3  -6   1  594.64   16.40
  -3   6  -1  610.74   16.40
   3   6   1  602.04   16.50
  -3   6  -1  601.44   15.90
   3   6   1  623.94   16.80
   4  -6   1   67.29    3.70
  -4  -6  -1   68.79    3.80
   4  -6   1   64.39    3.00
  -4  -6  -1   66.29    2.80
  -4   6  -1   68.89    2.90
   4   6   1   68.89    3.50
   4   6   1   64.49    3.60
  -4   6  -1   64.89    3.50
  -5  -6  -1   67.59    4.20
   5  -6   1   56.59    3.60
   5  -6   1   67.19    3.20
  -5  -6  -1   59.49    2.90
   5   6   1   56.59    3.50
  -5   6  -1   55.99    3.60
  -5   6  -1   61.79    3.00
   5   6   1   58.39    3.80
  -6  -6  -1   74.59    4.90
   6  -6   1   73.69    3.80
  -6  -6  -1   66.89    3.40
   6  -6   1   67.29    4.30
   6   6   1   67.49    4.30
  -6   6  -1   69.89    4.50
   6   6   1   75.99    4.80
  -6   6  -1   66.59    3.60
  -7  -6  -1    2.70    2.50
   7  -6   1    4.90    2.10
  -7   6  -1    5.20    2.70
  -7   6  -1    7.00    1.70
   7   6   1    8.90    2.70
   8  -6   1   15.60    3.10
  -8  -6  -1    7.70    3.30
  -8   6  -1    6.30    2.00
  -8   6  -1    5.20    2.70
   8   6   1    4.80    2.70
  -9  -6  -1   17.30    4.50
   9  -6   1   28.80    4.40
  -9   6  -1   29.60    3.60
   9   6   1   25.10    4.50
  -9   6  -1   20.60    4.10
  10  -6   1   60.49    5.80
 -10  -6  -1   47.50    6.70
  10   6   1   47.90    6.30
 -11  -6  -1   12.10    5.00
  11  -6   1   13.80    4.50
  11   6   1    7.10    3.90
 -11  -7   1    0.80    3.80
  11   7  -1    8.30    4.00
  10  -7  -1   36.70    4.90
 -10  -7   1   37.50    5.40
  10   7  -1   42.80    5.70
   9  -7  -1    8.60    3.10
  -9  -7   1    6.70    3.30
  -9   7   1    7.90    2.00
   9   7  -1    5.80    2.90
  -9   7   1    5.80    2.80
  -8  -7   1   17.20    3.10
   8  -7  -1   11.70    2.60
   8  -7  -1   11.60    2.70
  -8   7   1   15.20    2.80
  -8   7   1   17.40    2.40
   8   7  -1   12.00    3.20
   8   7  -1   15.20    3.10
   7  -7  -1    7.80    2.00
   7  -7  -1   13.10    2.30
  -7  -7   1    9.40    2.30
   7   7  -1   11.10    2.70
  -7   7   1   12.70    2.10
   7   7  -1   10.60    2.60
  -7   7   1    9.70    1.80
   6  -7  -1  189.38    7.40
  -6  -7   1  182.38    7.20
   6  -7  -1  201.88    7.30
   6   7  -1  194.68    7.80
   6   7  -1  179.88    7.90
  -6   7   1  203.28    6.80
  -6   7   1  190.78    6.30
  -5  -7   1    2.40    0.70
   5  -7  -1    5.50    1.40
  -5  -7   1    4.50    1.30
   5  -7  -1    2.40    1.20
  -5   7   1    5.70    1.10
  -5   7   1    4.10    1.10
   5   7  -1    0.90    1.30
   5   7  -1    3.70    1.80
   4  -7  -1   59.19    3.10
  -4  -7   1   56.59    1.90
  -4  -7   1   54.39    2.90
   4  -7  -1   56.79    3.20
  -4   7   1   60.79    2.60
   4   7  -1   59.19    3.70
  -4   7   1   62.39    2.60
   4   7  -1   57.99    3.40
   3  -7  -1   52.79    2.90
  -3  -7   1   52.29    1.60
   3  -7  -1   55.89    2.60
  -3  -7   1   51.99    2.50
   3   7  -1   53.39    3.10
  -3   7   1   53.29    2.10
  -3   7   1   54.09    2.20
   3   7  -1   53.29    3.20
   2  -7  -1   76.39    3.40
  -2  -7   1   87.39    3.10
   2   7  -1   87.09    3.70
  -2   7   1   83.79    2.80
  -2   7   1   75.59    3.70
  -2   7   1   80.89    2.60
   2   7  -1   89.39    4.00
  -1  -7   1 1045.00   25.70
   1  -7  -1 1039.60   26.40
   1  -7  -1 1015.70   25.70
  -1   7   1 1093.39   27.40
   1   7  -1 1071.39   27.50
  -1   7   1 1043.60   26.40
   1   7  -1 1070.79   26.00
   1   7  -1 1036.80   27.50
   0  -7  -1 1297.37   32.40
   0  -7   1 1235.18   31.40
   0  -7   1 1302.27   32.40
   0  -7  -1 1280.47   32.00
   0   7   1 1326.67   33.00
   0   7  -1 1351.36   34.20
   0   7  -1 1327.57   32.70
   0   7   1 1341.97   33.80
   1  -7   1 1373.86   33.90
  -1  -7  -1 1335.27   33.90
  -1  -7  -1 1312.27   33.90
   1   7   1 1384.86   34.00
   1   7   1 1372.06   33.10
  -1   7  -1 1346.77   34.70
  -1   7  -1 1266.97   33.00
  -2  -7  -1 1034.90   26.50
   2  -7   1 1000.50   25.90
   2  -7   1 1011.30   26.30
  -2   7  -1  999.50   25.30
   2   7   1 1010.00   25.90
   2   7   1  994.80   24.90
   2   7   1  980.60   25.80
   3  -7   1   60.59    3.10
  -3  -7  -1   61.09    3.30
   3  -7   1   57.19    2.70
  -3  -7  -1   56.59    2.40
   3   7   1   59.49    3.10
  -3   7  -1   61.69    3.00
   3   7   1   58.79    3.20
  -3   7  -1   57.29    2.50
   4  -7   1   25.90    2.50
  -4  -7  -1   28.70    2.70
  -4  -7  -1   29.20    1.90
   4  -7   1   28.60    2.10
   4   7   1   28.80    2.70
   4   7   1   25.60    2.50
  -4   7  -1   28.30    2.00
  -4   7  -1   27.70    2.50
  -5  -7  -1  180.58    7.50
   5  -7   1  196.78    7.40
   5  -7   1  202.88    6.70
  -5  -7  -1  190.58    6.20
   5   7   1  193.68    7.50
  -5   7  -1  188.68    7.20
  -5   7  -1  189.08    6.30
   5   7   1  198.38    7.20
  -6  -7  -1   16.80    2.00
   6  -7   1   14.40    2.00
   6  -7   1   11.30    2.30
  -6  -7  -1   17.10    2.80
  -6   7  -1   16.50    2.10
   6   7   1   12.90    2.50
   6   7   1   14.00    2.40
  -6   7  -1   16.10    2.60
   7  -7   1   90.19    5.60
  -7  -7  -1   96.29    6.20
   7   7   1   93.59    6.00
  -7   7  -1   85.19    5.60
  -7   7  -1   88.19    4.40
   8  -7   1   40.80    4.50
  -8  -7  -1   40.30    5.20
   8   7   1   36.90    4.60
  -8   7  -1   39.30    3.30
  -8   7  -1   30.00    4.40
  -9  -7  -1   15.50    4.30
   9  -7   1   16.20    3.40
  -9   7  -1    8.00    2.30
   9   7   1    8.90    3.50
 -10  -7  -1   21.90    5.40
  10  -7   1   28.20    4.90
  10   7   1   24.30    5.20
  11  -7   1    8.50    3.70
 -11  -7  -1    4.50    4.60
  11   7   1    5.40    4.20
 -11  -8   1    8.70    4.50
  11   8  -1   17.80    5.10
 -10  -8   1    5.70    3.60
  10  -8  -1    2.30    2.80
  10   8  -1    5.80    3.50
   9  -8  -1   39.60    4.60
  -9  -8   1   33.80    4.60
   9   8  -1   27.20    4.40
  -9   8   1   27.20    3.20
  -8  -8   1   16.70    3.10
   8  -8  -1    8.40    2.50
   8  -8  -1   13.20    2.90
   8   8  -1    6.40    2.80
  -8   8   1   11.00    2.60
   8   8  -1   14.20    3.30
  -8   8   1   10.80    2.00
   7  -8  -1   22.70    3.10
  -7  -8   1   26.50    3.30
   7  -8  -1   20.70    2.80
   7   8  -1   23.10    3.30
  -7   8   1   26.40    2.70
   7   8  -1   29.80    3.90
  -7   8   1   25.30    2.40
   6  -8  -1   31.40    3.10
  -6  -8   1   31.20    2.80
   6  -8  -1   24.30    2.60
  -6   8   1   26.60    2.20
   6   8  -1   26.40    3.30
  -6   8   1   31.30    2.20
   6   8  -1   26.20    3.10
   5  -8  -1   12.80    1.90
   5  -8  -1   13.50    1.90
  -5  -8   1   13.90    1.10
  -5  -8   1   15.20    2.00
   5   8  -1   14.80    2.50
   5   8  -1    8.90    2.00
  -5   8   1   20.90    1.70
  -5   8   1   14.80    1.60
  -4  -8   1  616.44   15.40
   4  -8  -1  604.64   17.10
   4  -8  -1  622.54   17.00
  -4  -8   1  627.94   17.00
  -4   8   1  640.24   16.30
   4   8  -1  596.74   17.60
   4   8  -1  628.74   18.00
  -4   8   1  628.54   16.40
   3  -8  -1  139.09    5.00
   3  -8  -1  138.69    5.20
  -3  -8   1  143.69    4.80
  -3   8   1  147.09    4.50
   3   8  -1  136.69    5.40
   3   8  -1  145.99    5.70
  -3   8   1  142.79    4.30
  -2  -8   1 1748.93   43.90
   2  -8  -1 1798.92   44.60
   2   8  -1 1765.82   44.50
  -2   8   1 1721.73   43.10
   2   8  -1 1779.82   44.30
  -2   8   1 1706.93   42.80
  -2   8   1 1766.82   44.40
   1  -8  -1  178.18    6.00
  -1  -8   1  192.18    5.20
   1  -8  -1  175.48    5.20
   1   8  -1  193.28    6.50
  -1   8   1  183.18    5.40
   1   8  -1  187.98    6.60
  -1   8   1  196.98    6.40
   1   8  -1  191.98    4.90
   0  -8  -1  398.76   11.20
   0  -8  -1  384.86   10.70
   0  -8   1  395.76   11.30
   0  -8   1  384.56   10.00
   0   8   1  409.96   11.50
   0   8   1  393.66   10.40
   0   8  -1  398.96   10.20
   0   8  -1  405.76   11.80
  -1  -8  -1 9291.57  231.48
  -1  -8  -1 9164.28  237.08
   1  -8   1 9782.72  231.48
  -1   8  -1 8972.50  237.18
   1   8   1 9822.52  236.08
  -1   8  -1 9999.00  232.28
  -1   8  -1 9129.59  233.98
   1   8   1 9633.14  232.68
  -2  -8  -1  312.17    9.30
   2  -8   1  311.67    9.00
   2  -8   1  298.07    9.20
   2   8   1  303.27    9.30
  -2   8  -1  308.27    8.50
   2   8   1  306.17    8.30
  -2   8  -1  317.87    8.50
  -2   8  -1  305.47   10.20
   2   8   1  299.17    9.30
  -3  -8  -1  236.48    6.70
   3  -8   1  234.78    7.70
   3  -8   1  235.48    7.20
  -3  -8  -1  231.58    7.90
  -3   8  -1  237.88    7.10
   3   8   1  246.38    8.00
  -3   8  -1  236.58    7.50
   3   8   1  246.58    8.00
  -4  -8  -1  979.00   24.90
  -4  -8  -1  960.50   26.40
   4  -8   1  972.80   26.20
   4  -8   1  994.60   25.50
   4   8   1  995.20   27.10
   4   8   1 1028.50   26.80
  -4   8  -1 1007.90   25.90
  -4   8  -1  990.00   26.50
  -5  -8  -1   11.40    1.50
  -5  -8  -1    9.60    2.20
   5  -8   1    8.70    1.50
   5  -8   1    7.30    1.80
  -5   8  -1   10.90    2.10
   5   8   1    7.30    1.90
  -5   8  -1   13.50    1.70
   5   8   1    4.60    1.70
   6  -8   1  106.19    4.80
   6  -8   1   99.49    5.30
  -6  -8  -1  110.19    6.00
  -6   8  -1   97.89    5.40
   6   8   1  107.99    5.50
   6   8   1  113.89    6.00
  -6   8  -1  109.59    4.70
   7  -8   1   45.70    4.00
  -7  -8  -1   47.10    4.80
  -7   8  -1   49.00    4.50
  -7   8  -1   49.40    3.50
   7   8   1   56.39    5.00
   8  -8   1    7.50    2.50
  -8  -8  -1    2.00    2.90
  -8   8  -1    3.20    2.80
   8   8   1    2.30    2.50
  -8   8  -1    4.50    1.80
  -9  -8  -1   37.10    5.60
   9  -8   1   42.20    4.80
   9   8   1   40.30    5.40
  -9   8  -1   43.50    4.10
  10  -8   1    1.30    2.80
 -10  -8  -1   -3.70    3.50
  10   8   1    1.00    3.50
 -10   8  -1    0.50    2.30
  11  -8   1    2.90    3.20
 -11  -8  -1   -0.20    5.00
  11   8   1    1.60    3.60
 -11  -9   1   -0.70    3.80
  11   9  -1    3.50    3.90
 -10  -9   1    4.20    3.40
  10  -9  -1   12.00    3.50
 -10   9   1   11.90    2.80
  10   9  -1   14.20    4.20
   9  -9  -1   18.50    3.40
  -9  -9   1   16.60    3.70
   9   9  -1   23.00    4.40
  -9   9   1   16.30    2.90
   8  -9  -1    3.60    2.00
   8  -9  -1    1.20    2.10
  -8  -9   1    3.50    2.30
  -8   9   1    4.80    1.60
  -8   9   1    1.50    1.90
   8   9  -1    7.90    3.00
   8   9  -1   -1.10    2.00
   7  -9  -1   19.90    2.80
  -7  -9   1   14.90    2.60
   7  -9  -1   16.00    2.60
   7   9  -1   14.70    2.90
  -7   9   1   15.80    2.30
  -7   9   1   13.30    2.00
   7   9  -1   18.30    3.40
   6  -9  -1   -1.20    1.30
   6  -9  -1    3.10    1.70
  -6  -9   1    2.40    1.50
  -6   9   1    2.20    1.10
  -6   9   1    2.50    1.20
   6   9  -1    0.20    1.90
   6   9  -1    0.10    1.60
   5  -9  -1  251.87    8.30
  -5  -9   1  238.08    6.70
   5  -9  -1  240.98    8.40
  -5  -9   1  237.18    8.20
   5   9  -1  248.58    9.10
  -5   9   1  239.98    7.40
  -5   9   1  244.98    7.50
   5   9  -1  244.08    8.90
  -4  -9   1  166.58    5.80
   4  -9  -1  166.48    6.00
   4  -9  -1  160.68    6.20
  -4  -9   1  167.08    4.50
  -4   9   1  164.88    5.10
   4   9  -1  162.08    6.50
  -4   9   1  167.48    5.40
   4   9  -1  169.58    6.80
   3  -9  -1   74.39    3.60
  -3  -9   1   80.39    3.30
   3  -9  -1   78.19    3.50
  -3   9   1   77.69    2.60
  -3   9   1   81.59    3.00
   3   9  -1   78.29    4.20
   3   9  -1   78.09    4.00
   2  -9  -1  122.39    4.70
  -2  -9   1  132.09    4.20
  -2   9   1  134.79    4.10
  -2   9   1  129.59    3.80
  -2   9   1  135.79    5.30
   2   9  -1  129.79    5.20
   2   9  -1  135.59    5.50
  -1  -9   1   27.40    1.30
   1  -9  -1   22.20    2.10
   1  -9  -1   25.70    1.50
   1   9  -1   28.90    2.30
   1   9  -1   23.90    2.60
  -1   9   1   23.40    2.20
  -1   9   1   25.80    1.40
   1   9  -1   28.20    1.00
   0  -9   1   16.00    0.90
   0  -9   1   12.80    1.90
   0  -9  -1   14.40    2.00
   0  -9  -1   16.00    1.70
   0   9   1   17.00    1.90
   0   9   1   14.60    1.10
   0   9  -1   14.20    2.00
  -1  -9  -1  151.28    5.70
  -1  -9  -1  155.78    5.40
   1  -9   1  157.58    5.70
   1   9   1  152.68    4.50
  -1   9  -1  155.18    4.50
  -1   9  -1  144.49    6.00
   1   9   1  159.28    5.60
  -2  -9  -1  118.89    4.70
  -2  -9  -1  119.69    4.70
   2  -9   1  122.99    4.60
  -2   9  -1  123.49    3.90
   2   9   1  119.59    4.80
  -2   9  -1  117.59    5.50
  -2   9  -1  119.79    3.90
   2   9   1  122.79    3.80
  -3  -9  -1  286.57    9.30
   3  -9   1  284.37    8.70
   3  -9   1  287.17    9.20
   3   9   1  294.77    8.00
   3   9   1  284.87    9.30
  -3   9  -1  282.37    8.30
  -3   9  -1  296.17    8.60
   3   9   1  289.17    9.30
  -4  -9  -1   35.00    2.10
   4  -9   1   34.50    2.80
  -4  -9  -1   40.00    3.10
   4  -9   1   41.30    2.60
   4   9   1   38.00    3.20
  -4   9  -1   41.60    2.30
   4   9   1   42.00    3.30
  -4   9  -1   40.10    2.70
   5  -9   1  227.18    8.30
  -5  -9  -1  219.98    7.00
   5  -9   1  233.38    7.70
  -5  -9  -1  230.58    8.70
   5   9   1  240.58    8.90
   5   9   1  247.68    8.60
  -5   9  -1  224.88    8.20
  -5   9  -1  223.68    7.40
   6  -9   1  176.08    7.60
   6  -9   1  199.88    7.00
  -6  -9  -1  183.48    8.20
   6   9   1  211.88    8.20
   6   9   1  198.78    8.40
  -6   9  -1  187.98    7.90
  -6   9  -1  193.58    7.00
   7  -9   1    3.00    2.20
  -7  -9  -1    1.10    2.50
  -7   9  -1    1.00    2.20
   7   9   1    2.90    2.20
  -7   9  -1    0.20    1.40
  -8  -9  -1   48.40    5.40
   8  -9   1   54.79    4.70
  -8   9  -1   52.79    4.00
   8   9   1   51.59    5.20
  -9  -9  -1    3.20    3.50
   9  -9   1    9.50    3.10
  -9   9  -1    5.90    2.20
   9   9   1    9.60    3.50
  10  -9   1    7.30    3.60
 -10  -9  -1   -4.30    3.50
  10   9   1    3.90    3.40
 -10   9  -1    8.60    2.70
 -11  -9  -1    6.20    5.30
  11  -9   1    4.40    3.70
  11   9   1    4.80    4.20
 -11 -10   1   -0.30    3.90
  11  10  -1    6.10    3.70
  10 -10  -1    5.10    2.70
 -10 -10   1   -1.50    2.90
 -10  10   1    3.20    2.50
  10  10  -1    4.40    3.60
  -9 -10   1   15.70    3.80
   9 -10  -1   14.60    3.30
  -9  10   1   23.00    3.10
   9  10  -1   21.50    4.30
   8 -10  -1   71.69    5.20
  -8 -10   1   79.79    5.80
   8 -10  -1   91.59    5.60
  -8  10   1   80.39    4.30
   8  10  -1   76.59    6.00
   8  10  -1   78.99    6.20
   7 -10  -1  111.29    5.90
   7 -10  -1  110.79    5.70
  -7 -10   1  124.89    6.10
   7  10  -1  106.49    6.40
  -7  10   1  118.29    5.30
   7  10  -1  111.99    6.70
  -7  10   1  120.99    5.00
   6 -10  -1   24.60    2.80
  -6 -10   1   33.30    3.00
   6 -10  -1   33.10    2.90
  -6  10   1   31.90    2.40
   6  10  -1   31.70    3.70
  -6  10   1   34.00    2.50
   6  10  -1   36.30    3.90
   5 -10  -1   14.30    2.10
   5 -10  -1   17.10    2.20
  -5 -10   1   17.20    2.10
   5  10  -1   17.70    2.80
  -5  10   1   16.10    1.50
   5  10  -1   19.70    2.60
  -5  10   1   18.20    1.60
   4 -10  -1  113.59    5.00
   4 -10  -1  121.09    4.90
  -4 -10   1  124.39    4.80
  -4 -10   1  120.09    3.30
  -4  10   1  121.89    4.10
   4  10  -1  129.59    5.80
  -4  10   1  131.49    4.40
   4  10  -1  125.59    5.90
   3 -10  -1   14.30    1.80
   3 -10  -1   13.70    1.90
  -3 -10   1   14.60    1.50
  -3  10   1   12.90    1.20
   3  10  -1   11.70    2.10
  -3  10   1   10.60    0.90
   3  10  -1   13.10    2.00
   2 -10  -1   66.09    3.20
  -2 -10   1   60.89    2.50
   2  10  -1   57.19    3.40
   2  10  -1   61.59    3.60
  -2  10   1   60.79    3.40
  -2  10   1   63.09    2.40
  -2  10   1   60.19    2.00
   1 -10  -1   33.30    2.50
   1 -10  -1   35.10    1.70
  -1 -10   1   35.70    1.60
   1  10  -1   39.70    2.80
   1  10  -1   32.00    2.90
  -1  10   1   38.40    2.80
   1  10  -1   42.00    1.40
  -1  10   1   51.29    2.00
   0 -10   1  547.45   15.40
   0 -10   1  553.24   13.80
   0 -10  -1  547.75   15.50
   0 -10  -1  544.85   14.70
   0  10   1  542.05   14.20
   0  10   1  556.04   15.60
   0  10  -1  568.64   16.00
   0  10  -1  560.84   14.10
  -1 -10  -1 1622.04   40.40
   1 -10   1 1590.54   40.30
  -1 -10  -1 1515.15   39.80
   1  10   1 1697.33   41.20
  -1  10  -1 1707.53   43.30
  -1  10  -1 1614.44   41.20
   1  10   1 1667.33   42.60
   2 -10   1  690.73   18.70
  -2 -10  -1  693.23   18.90
  -2 -10  -1  688.03   18.80
   2  10   1  710.43   19.50
   2  10   1  713.53   18.00
  -2  10  -1  693.13   18.00
  -2  10  -1  722.33   20.50
  -2  10  -1  718.83   18.30
   3 -10   1  303.97    9.70
  -3 -10  -1  310.67    9.80
   3 -10   1  299.77    9.20
   3  10   1  312.07   10.10
  -3  10  -1  312.67    9.10
   3  10   1  306.07    8.50
   3  10   1  314.97   10.10
  -3  10  -1  312.07    8.90
  -4 -10  -1   90.79    3.50
   4 -10   1  101.89    4.80
  -4 -10  -1   97.79    4.80
   4 -10   1   90.99    4.10
   4  10   1  110.99    5.20
  -4  10  -1   95.59    4.40
   4  10   1  109.79    5.10
  -4  10  -1  102.39    4.00
  -5 -10  -1  523.15   14.40
  -5 -10  -1  511.55   16.40
   5 -10   1  557.94   16.10
   5 -10   1  545.25   15.30
   5  10   1  560.84   16.30
  -5  10  -1  535.55   15.10
   5  10   1  529.35   16.40
  -5  10  -1  530.15   15.70
   6 -10   1   79.59    4.20
  -6 -10  -1   75.29    5.20
   6 -10   1   70.79    4.60
   6  10   1   73.49    5.10
   6  10   1   83.29    5.10
  -6  10  -1   77.99    3.90
  -6  10  -1   67.19    4.70
   7 -10   1   22.10    3.30
  -7 -10  -1   28.00    4.30
  -7  10  -1   22.80    3.50
   7  10   1   26.10    3.80
  -7  10  -1   20.30    2.70
  -8 -10  -1   26.10    4.60
   8 -10   1   26.30    3.70
   8  10   1   31.30    4.50
  -8  10  -1   35.40    3.60
  -9 -10  -1   10.10    4.20
   9 -10   1   12.40    3.40
  -9  10  -1   16.70    3.10
   9  10   1   21.70    4.30
  10 -10   1   23.50    4.20
 -10 -10  -1   27.30    5.60
 -10  10  -1   30.70    3.90
  10  10   1   29.20    5.20
 -11 -10  -1    2.30    5.10
  11 -10   1    6.60    4.10
  11  10   1    0.40    4.10
 -11 -11   1    7.50    4.90
  11  11  -1    6.70    4.20
 -10 -11   1   13.40    4.40
  10  11  -1   15.70    4.40
 -10  11   1   14.50    3.10
  -9 -11   1   21.40    4.20
   9 -11  -1   16.50    3.40
   9  11  -1   16.40    4.10
  -9  11   1   16.80    2.80
   8 -11  -1   44.20    4.30
  -8 -11   1   41.00    4.30
   8 -11  -1   39.40    3.90
   8  11  -1   34.90    4.60
  -8  11   1   36.20    3.10
   8  11  -1   39.00    4.90
   7 -11  -1   18.70    2.90
  -7 -11   1   22.60    3.20
   7 -11  -1   25.40    3.20
  -7  11   1   22.30    2.40
   7  11  -1   14.60    3.30
   7  11  -1   14.70    3.40
   6 -11  -1  202.28    7.80
   6 -11  -1  199.58    7.90
  -6 -11   1  203.38    7.90
   6  11  -1  197.68    8.80
  -6  11   1  204.38    6.80
  -6  11   1  201.38    6.90
   6  11  -1  208.68    8.60
   5 -11  -1    8.60    1.90
   5 -11  -1    6.90    1.70
  -5 -11   1    6.60    1.60
   5  11  -1    9.60    2.30
  -5  11   1    7.40    1.30
  -5  11   1   11.10    1.40
   5  11  -1    5.00    2.00
   4 -11  -1   59.99    3.70
  -4 -11   1   68.49    3.30
   4 -11  -1   65.79    3.50
  -4  11   1   63.79    2.90
   4  11  -1   68.49    4.20
  -4  11   1   69.79    2.60
   4  11  -1   63.39    4.40
  -3 -11   1   16.60    1.60
   3 -11  -1   10.60    1.60
   3 -11  -1   17.60    2.00
  -3  11   1   18.90    1.10
   3  11  -1   14.90    2.40
   3  11  -1   16.50    2.30
  -3  11   1   14.50    1.40
  -2 -11   1  111.39    3.90
   2 -11  -1  118.49    4.80
  -2  11   1  109.79    3.30
   2  11  -1  107.89    5.10
   2  11  -1  118.79    5.20
  -2  11   1  115.99    3.80
  -2  11   1  121.59    5.20
   1 -11  -1  348.57   10.30
  -1 -11   1  336.47    9.00
   1 -11  -1  325.57    9.00
  -1  11   1  335.77    9.30
  -1  11   1  364.16   10.90
   1  11  -1  333.57   10.90
   1  11  -1  353.86    8.80
   1  11  -1  344.97   11.00
   0 -11  -1  454.85   13.60
   0 -11   1  467.85   11.80
   0 -11   1  465.95   13.60
   0 -11  -1  471.55   12.80
   0  11   1  477.55   13.80
   0  11   1  470.65   12.20
   0  11  -1  472.85   14.10
   0  11  -1  466.05   12.00
   1 -11   1 1250.97   32.20
  -1 -11  -1 1216.48   31.50
  -1 -11  -1 1215.48   32.00
   1  11   1 1299.87   33.10
   1  11   1 1281.77   31.40
  -1  11  -1 1245.48   33.70
  -1  11  -1 1240.48   31.50
  -2 -11  -1   43.90    2.80
  -2 -11  -1   50.09    3.10
   2 -11   1   44.60    3.00
   2  11   1   44.90    3.10
   2  11   1   49.90    1.90
  -2  11  -1   43.40    1.90
  -2  11  -1   42.10    3.50
  -2  11  -1   44.10    2.10
  -3 -11  -1  697.93   19.60
   3 -11   1  725.63   19.70
   3 -11   1  685.53   19.10
  -3  11  -1  710.13   18.80
   3  11   1  707.93   20.10
   3  11   1  716.13   18.20
   3  11   1  739.03   20.10
  -3  11  -1  704.23   18.70
   4 -11   1  314.77   10.20
   4 -11   1  305.17    9.60
  -4 -11  -1  310.47   10.40
  -4  11  -1  297.47    9.40
   4  11   1  307.67    8.60
   4  11   1  314.57   10.60
  -4  11  -1  307.77    9.10
   4  11   1  319.07   10.40
   5 -11   1   47.70    3.10
  -5 -11  -1   42.80    3.70
   5 -11   1   42.00    3.40
  -5  11  -1   46.60    3.30
   5  11   1   39.00    3.70
   5  11   1   48.70    4.10
  -5  11  -1   42.60    2.70
   6 -11   1  167.38    6.50
  -6 -11  -1  142.29    7.30
   6 -11   1  153.38    6.90
  -6  11  -1  166.08    6.30
  -6  11  -1  143.99    6.90
   6  11   1  170.48    7.50
   6  11   1  167.48    7.70
  -7 -11  -1   -1.90    2.40
   7 -11   1   -0.30    1.90
  -7  11  -1    1.50    1.50
   7  11   1    1.90    2.40
   8 -11   1    6.60    2.50
  -8 -11  -1   10.10    3.60
   8  11   1    1.40    2.90
  -8  11  -1    9.00    2.20
   9 -11   1   12.50    3.40
  -9 -11  -1    3.80    3.80
   9  11   1    5.80    3.70
  -9  11  -1    9.20    2.40
  10 -11   1    5.00    3.40
 -10 -11  -1    4.70    4.40
  10  11   1    7.60    3.90
 -10  11  -1    3.90    2.70
  11 -11   1    2.20    3.30
 -11 -11  -1   -1.90    5.10
  11  11   1    5.30    4.10
 -11 -12   1   12.90    4.90
  11  12  -1    9.90    4.70
 -10 -12   1    0.00    3.20
 -10  12   1    3.60    2.30
  10  12  -1    0.20    3.20
  -9 -12   1   10.30    3.40
   9 -12  -1   13.80    3.20
  -9  12   1    8.20    2.50
   9  12  -1    8.10    3.30
   8 -12  -1   16.10    3.00
   8 -12  -1   13.40    2.80
  -8 -12   1   11.40    3.00
  -8  12   1    9.40    2.20
   8  12  -1   13.10    3.70
   8  12  -1    6.90    3.10
  -7 -12   1   21.00    3.20
   7 -12  -1   25.20    3.10
   7 -12  -1   26.30    3.40
  -7  12   1   27.90    2.50
   7  12  -1   16.80    3.40
   7  12  -1   33.20    4.50
  -6 -12   1  455.15   13.90
   6 -12  -1  425.76   13.90
   6 -12  -1  426.56   13.70
   6  12  -1  434.06   14.90
  -6  12   1  445.06   12.70
  -6  12   1  450.05   12.60
   6  12  -1  412.96   14.50
   5 -12  -1   29.70    2.80
  -5 -12   1   27.90    2.50
   5 -12  -1   29.50    2.80
  -5  12   1   32.00    1.90
   5  12  -1   29.70    3.60
   5  12  -1   20.10    2.90
  -5  12   1   31.10    2.10
   4 -12  -1   97.39    4.40
   4 -12  -1   89.39    4.40
  -4 -12   1   91.29    4.00
  -4  12   1   97.49    3.80
   4  12  -1   95.49    5.30
  -4  12   1   99.39    3.30
   4  12  -1   95.19    5.20
   3 -12  -1  177.38    6.60
  -3 -12   1  182.28    6.00
  -3  12   1  196.68    6.00
  -3  12   1  195.98    5.30
  -3  12   1  186.18    7.70
   3  12  -1  191.18    7.60
   3  12  -1  189.98    7.50
   2 -12  -1   53.19    3.20
  -2 -12   1   53.49    2.40
   2  12  -1   54.29    3.70
   2  12  -1   54.09    3.60
  -2  12   1   51.09    1.80
  -2  12   1   53.09    3.50
  -2  12   1   54.69    2.30
   1 -12  -1   82.59    4.00
  -1 -12   1   79.79    2.70
   1 -12  -1   74.39    2.80
  -1 -12   1   73.09    4.00
  -1  12   1   78.79    2.90
   1  12  -1   72.49    4.30
  -1  12   1   78.79    4.20
   1  12  -1   81.49    4.30
   1  12  -1   85.89    2.50
   0 -12  -1   51.59    3.30
   0 -12  -1   44.20    2.50
   0 -12   1   47.40    3.20
   0 -12   1   45.20    1.60
   0  12  -1   47.60    3.30
   0  12  -1   42.80    1.70
   0  12   1   43.00    3.10
   0  12   1   43.00    1.90
   1 -12   1 1376.86   36.00
  -1 -12  -1 1407.56   36.00
  -1 -12  -1 1347.47   35.10
   1  12   1 1452.25   37.60
   1  12   1 1440.76   35.60
  -1  12  -1 1473.85   38.30
  -1  12  -1 1404.86   35.70
   2 -12   1  302.77    9.60
  -2 -12  -1  298.77    9.40
  -2 -12  -1  292.07    9.60
  -2  12  -1  296.37    8.50
   2  12   1  312.17    8.30
  -2  12  -1  317.17   11.00
   2  12   1  304.57   10.00
   3 -12   1 1015.40   27.20
  -3 -12  -1  994.50   27.10
   3 -12   1 1009.10   26.70
  -3  12  -1 1011.50   26.00
   3  12   1 1026.10   27.60
   3  12   1 1000.80   25.40
  -3  12  -1  988.40   25.80
   3  12   1 1039.80   27.60
  -4 -12  -1   15.70    2.50
   4 -12   1    9.00    1.80
   4 -12   1   14.10    1.90
  -4  12  -1   13.60    1.90
   4  12   1   14.70    2.50
   4  12   1   12.80    2.30
   4  12   1   13.90    1.40
  -4  12  -1   12.30    1.50
  -5 -12  -1    8.00    2.30
   5 -12   1   16.30    2.20
   5 -12   1   10.50    2.10
  -5  12  -1   13.10    1.70
  -5  12  -1   12.20    2.20
   5  12   1   14.40    2.60
   5  12   1   14.30    2.70
  -6 -12  -1  551.84   18.20
   6 -12   1  601.24   16.90
   6 -12   1  557.64   17.40
   6  12   1  583.54   18.10
   6  12   1  596.34   18.70
  -6  12  -1  574.34   16.60
   7 -12   1    5.90    2.30
  -7 -12  -1   11.10    3.30
   7  12   1    5.50    2.90
  -7  12  -1    8.60    2.00
  -8 -12  -1    3.00    3.50
   8 -12   1    3.60    2.60
  -8  12  -1    3.10    1.90
   8  12   1    2.00    2.80
  -9 -12  -1   23.40    5.20
   9 -12   1   42.40    4.90
  -9  12  -1   38.10    4.00
   9  12   1   43.00    5.90
 -10 -12  -1    1.40    4.10
  10 -12   1   10.10    3.70
  10  12   1    2.50    3.90
 -10  12  -1    6.90    2.90
  11 -12   1    7.50    3.80
 -11 -12  -1    1.10    4.50
  11  12   1    4.60    4.50
 -11 -13   1   10.00    4.80
  11  13  -1    4.60    4.10
 -10 -13   1    8.00    4.20
  10  13  -1   14.90    4.40
 -10  13   1   13.90    3.10
  -9 -13   1    2.40    3.00
   9 -13  -1    3.30    2.60
   9  13  -1    4.20    3.00
  -9  13   1    6.20    2.20
  -8 -13   1   28.80    4.10
   8 -13  -1   40.50    3.90
   8 -13  -1   30.90    3.90
   8  13  -1   36.60    5.00
  -8  13   1   29.30    3.10
   8  13  -1   33.20    4.70
  -7 -13   1  118.99    6.40
   7 -13  -1  120.49    6.10
   7 -13  -1  125.29    6.50
   7  13  -1  106.89    6.80
  -7  13   1  123.39    5.30
   7  13  -1  117.59    6.90
  -6 -13   1   51.09    4.00
   6 -13  -1   48.60    3.80
   6 -13  -1   48.50    3.90
  -6  13   1   47.00    2.90
   6  13  -1   35.00    4.10
   6  13  -1   49.20    4.60
   5 -13  -1   80.79    4.50
   5 -13  -1   74.19    4.30
  -5 -13   1   78.09    4.10
  -5  13   1   77.69    3.60
  -5  13   1   78.69    3.20
   5  13  -1   79.19    5.40
   5  13  -1   78.99    5.10
  -4 -13   1   54.19    3.00
   4 -13  -1   53.79    3.40
   4 -13  -1   48.50    3.30
   4  13  -1   49.30    3.80
   4  13  -1   54.39    4.20
  -4  13   1   52.19    2.10
  -4  13   1   53.89    2.60
   3 -13  -1  195.78    7.20
  -3 -13   1  195.08    6.50
   3  13  -1  191.58    8.00
  -3  13   1  195.58    8.10
   3  13  -1  192.98    7.70
  -3  13   1  193.88    5.30
  -3  13   1  200.28    6.10
  -2 -13   1   77.79    3.10
   2 -13  -1   70.49    3.90
   2  13  -1   84.49    2.30
   2  13  -1   69.19    4.40
  -2  13   1   74.39    2.40
   2  13  -1   87.29    4.60
  -2  13   1   81.79    3.10
  -2  13   1   76.59    4.40
   1 -13  -1  169.58    5.30
  -1 -13   1  175.18    6.80
   1 -13  -1  180.48    6.70
  -1 -13   1  186.68    5.30
   1  13  -1  198.28    5.20
  -1  13   1  203.28    7.50
  -1  13   1  180.98    5.60
   1  13  -1  189.28    7.50
   0 -13  -1  153.08    5.40
   0 -13   1  158.48    4.40
   0 -13  -1  148.89    6.20
   0 -13   1  155.68    6.40
   0  13   1  175.98    6.70
   0  13  -1  168.68    6.80
   0  13   1  164.88    5.00
   0  13  -1  169.68    4.90
  -1 -13  -1  327.07   10.80
   1 -13   1  325.97   10.80
  -1 -13  -1  340.07   10.10
   1  13   1  337.87    9.10
   1  13   1  341.87   11.00
  -1  13  -1  337.67    9.20
  -1  13  -1  337.67   11.50
  -2 -13  -1  244.28    8.10
  -2 -13  -1  249.18    8.70
   2 -13   1  240.78    8.30
   2  13   1  263.27    7.10
  -2  13  -1  266.87    7.50
  -2  13  -1  259.47    9.90
   2  13   1  241.88    8.90
   3 -13   1 1372.86   35.80
  -3 -13  -1 1324.77   35.60
   3 -13   1 1374.46   35.30
  -3 -13  -1 1342.37   35.60
   3  13   1 1391.26   34.20
   3  13   1 1371.36   36.70
  -3  13  -1 1375.96   34.80
   3  13   1 1423.06   36.90
  -3  13  -1 1339.97   34.50
   4 -13   1   92.39    4.90
   4 -13   1  101.49    4.60
  -4 -13  -1   92.69    5.00
  -4  13  -1   91.89    3.80
  -4  13  -1   93.39    4.10
   4  13   1   91.19    3.30
   4  13   1   87.29    5.10
   4  13   1   93.59    5.10
  -5 -13  -1  214.68    8.80
   5 -13   1  228.98    8.00
   5 -13   1  224.98    8.70
   5  13   1  226.88    9.00
  -5  13  -1  232.88    7.60
   5  13   1  226.18    9.20
  -5  13  -1  215.48    7.90
   6 -13   1  195.98    7.40
  -6 -13  -1  168.88    8.40
   6 -13   1  196.98    8.20
   6  13   1  201.08    8.60
   6  13   1  196.38    9.00
  -6  13  -1  184.08    7.00
  -7 -13  -1   38.20    4.80
   7 -13   1   31.70    4.00
  -7  13  -1   38.20    3.20
   7  13   1   40.10    4.80
  -8 -13  -1   18.60    4.30
   8 -13   1   25.20    4.00
  -8  13  -1   19.10    2.90
   8  13   1   24.20    4.30
   9 -13   1    3.00    2.90
  -9 -13  -1    1.60    4.00
  -9  13  -1    0.60    1.90
   9  13   1    4.80    3.40
 -10 -13  -1    5.30    4.90
  10 -13   1    6.20    3.20
  10  13   1    8.30    4.40
 -10  13  -1   14.30    3.40
  11 -13   1    2.80    3.40
  11  13   1    2.20    3.80
 -11  13  -1    3.30    2.60
 -11 -14   1   -3.80    4.30
 -11  14   1    7.30    2.80
  11  14  -1    5.20    4.40
 -10 -14   1    4.00    3.70
 -10  14   1   -0.30    2.00
  10  14  -1    8.30    4.00
   9 -14  -1   17.90    3.60
  -9 -14   1   20.90    4.30
   9  14  -1   15.60    4.00
  -9  14   1   15.80    2.70
   8 -14  -1   54.89    4.70
  -8 -14   1   49.50    4.90
   8 -14  -1   53.79    4.70
   8  14  -1   54.49    6.00
   8  14  -1   61.59    5.70
  -8  14   1   60.29    3.90
  -7 -14   1   36.60    3.80
   7 -14  -1   30.40    3.60
   7 -14  -1   40.00    3.70
   7  14  -1   41.70    5.00
   7  14  -1   31.60    4.60
  -7  14   1   28.30    2.80
   6 -14  -1  186.38    7.70
   6 -14  -1  184.98    7.80
  -6 -14   1  182.98    7.70
   6  14  -1  178.08    8.80
   6  14  -1  182.48    8.50
  -6  14   1  181.78    6.50
  -5 -14   1   77.49    4.20
   5 -14  -1   81.09    4.50
   5 -14  -1   79.49    4.70
   5  14  -1   86.29    5.40
  -5  14   1   87.59    3.40
   5  14  -1   78.99    5.40
  -5  14   1   86.49    3.90
  -4 -14   1    9.20    1.60
   4 -14  -1    8.00    1.90
   4 -14  -1    8.30    1.80
   4  14  -1    9.30    2.20
   4  14  -1    8.30    2.30
  -4  14   1   11.50    1.50
  -4  14   1    7.90    0.90
   3 -14  -1  162.18    6.50
  -3 -14   1  160.38    5.60
   3  14  -1  165.58    7.10
   3  14  -1  150.88    7.10
  -3  14   1  158.88    5.30
  -3  14   1  162.68    7.40
  -3  14   1  168.38    4.50
  -2 -14   1   15.40    1.40
   2 -14  -1   16.20    2.30
   2  14  -1   19.30    2.80
  -2  14   1   17.10    1.50
  -2  14   1   20.30    2.70
   2  14  -1   19.00    2.80
   2  14  -1   15.80    0.80
  -2  14   1   14.00    0.90
  -1 -14   1 1055.09   25.40
  -1 -14   1 1008.70   27.40
   1 -14  -1  981.60   25.40
   1 -14  -1  981.70   27.40
   1  14  -1 1068.39   29.80
   1  14  -1 1132.39   26.90
  -1  14   1 1058.79   27.40
  -1  14   1 1091.29   29.70
   0 -14   1    9.40    2.10
   0 -14  -1   13.40    2.20
   0 -14   1   13.40    0.90
   0 -14  -1   12.90    1.70
   0  14   1   14.50    1.10
   0  14  -1   13.60    2.40
   0  14  -1   14.00    1.00
   0  14   1   13.90    2.30
  -1 -14  -1   89.79    4.10
  -1 -14  -1   91.59    4.90
   1 -14   1   91.99    4.90
   1  14   1   93.99    4.80
   1  14   1   95.79    3.20
  -1  14  -1   89.69    3.20
  -1  14  -1   93.19    5.30
  -2 -14  -1  292.17   10.20
  -2 -14  -1  303.87    9.80
   2 -14   1  314.77   10.40
  -2  14  -1  307.07    8.90
   2  14   1  323.07    8.50
  -2  14  -1  313.97   11.40
   2  14   1  316.17   10.70
   3 -14   1  247.48    8.50
  -3 -14  -1  254.67    8.90
  -3 -14  -1  235.38    8.60
  -3  14  -1  236.38   10.20
  -3  14  -1  255.17    7.40
  -3  14  -1  233.28    6.90
   3  14   1  240.68    9.10
   3  14   1  243.48    6.80
  -4 -14  -1   11.80    2.30
   4 -14   1   13.40    2.30
   4 -14   1   15.10    2.20
  -4  14  -1   15.60    1.80
   4  14   1   14.30    1.30
   4  14   1   13.30    2.60
   4  14   1   11.50    2.30
  -4  14  -1   16.50    1.90
   5 -14   1  274.67    9.10
  -5 -14  -1  250.27   10.10
   5 -14   1  265.37    9.70
   5  14   1  304.67   10.70
  -5  14  -1  266.37    8.80
   5  14   1  266.87   10.50
   6 -14   1   64.99    4.60
  -6 -14  -1   59.99    5.00
   6 -14   1   65.99    4.20
   6  14   1   60.89    5.10
   6  14   1   52.19    4.80
  -6  14  -1   61.49    3.80
  -7 -14  -1    2.20    2.80
   7 -14   1    6.80    2.40
   7  14   1    5.20    2.70
  -7  14  -1    3.00    1.70
  -8 -14  -1    9.30    3.80
   8 -14   1    4.90    2.60
   8  14   1    8.80    3.70
  -8  14  -1    7.80    2.30
  -9 -14  -1   11.30    4.50
   9 -14   1   12.20    3.30
   9  14   1   15.00    4.50
  -9  14  -1   14.70    2.90
 -10 -14  -1   -1.40    4.00
  10 -14   1    4.80    3.60
  10  14   1    2.30    3.60
 -10  14  -1    8.10    2.90
  11 -14   1   22.70    5.00
 -11  14  -1   13.10    3.40
  11  14   1   27.90    5.90
  11  15  -1    7.10    4.60
 -11  15   1   13.50    3.50
 -10 -15   1   -2.90    3.60
 -10  15   1   -1.60    2.10
  10  15  -1    7.70    4.20
   9 -15  -1   17.70    3.40
  -9 -15   1   12.70    3.90
  -9  15   1   12.60    2.80
   9  15  -1   16.60    4.30
  -8 -15   1   67.59    5.60
   8 -15  -1   66.29    5.20
   8 -15  -1   67.69    4.90
  -8  15   1   68.29    4.30
   8  15  -1   62.49    6.40
   8  15  -1   75.79    6.30
   7 -15  -1   93.99    5.80
   7 -15  -1   96.59    5.60
  -7 -15   1   74.69    5.30
   7  15  -1  100.69    7.10
  -7  15   1   87.69    4.50
   7  15  -1   91.59    6.60
   6 -15  -1  177.78    7.40
  -6 -15   1  163.98    7.20
   6 -15  -1  160.08    7.30
   6  15  -1  171.48    8.60
  -6  15   1  180.18    6.50
   6  15  -1  175.78    8.60
  -5 -15   1   61.09    3.80
   5 -15  -1   63.89    4.10
   5 -15  -1   58.59    4.20
   5  15  -1   61.79    5.30
  -5  15   1   58.59    3.10
   5  15  -1   54.09    4.50
  -4 -15   1   75.39    3.80
   4 -15  -1   65.69    4.30
   4 -15  -1   78.49    4.40
  -4  15   1   81.19    2.80
  -4  15   1   77.99    3.40
   4  15  -1   81.59    5.00
   4  15  -1   78.89    5.20
   3 -15  -1  182.88    7.30
  -3 -15   1  181.78    6.20
   3  15  -1  196.58    8.10
  -3  15   1  184.58    4.90
   3  15  -1  172.08    7.60
  -3  15   1  176.88    7.80
  -3  15   1  184.28    5.90
  -2 -15   1  424.86   11.90
   2 -15  -1  438.66   13.40
   2  15  -1  445.66   14.40
  -2  15   1  405.46   11.10
   2  15  -1  449.86   14.50
  -2  15   1  455.45   12.10
   2  15  -1  473.45   11.20
  -2  15   1  434.76   14.20
  -1 -15   1  261.87    7.30
   1 -15  -1  250.07    7.30
   1 -15  -1  253.57    9.20
  -1 -15   1  252.67    9.20
   1  15  -1  286.67    7.40
  -1  15   1  289.47   10.10
  -1  15   1  259.87    7.90
   1  15  -1  285.17   10.10
   0 -15   1   94.29    5.10
   0 -15  -1   96.19    4.10
   0 -15   1  100.69    3.10
   0 -15  -1   99.29    5.40
   0  15   1  102.89    3.40
   0  15  -1  103.49    3.30
   0  15  -1   93.99    5.40
   0  15   1   95.79    5.10
   1 -15   1  581.54   17.90
   1 -15   1  656.93   15.30
  -1 -15  -1  607.74   18.10
  -1 -15  -1  612.54   17.20
  -1  15  -1  621.94   16.10
  -1  15  -1  630.64   19.00
   1  15   1  614.24   18.40
   1  15   1  615.64   15.90
   2 -15   1   18.10    2.50
  -2 -15  -1   16.20    2.50
  -2 -15  -1   17.10    2.20
   2  15   1   18.90    2.70
  -2  15  -1   16.00    3.00
  -2  15  -1   18.70    1.50
   2  15   1   19.90    1.30
  -3 -15  -1  205.58    8.10
   3 -15   1  205.98    7.80
  -3 -15  -1  214.28    7.90
   3  15   1  214.18    6.00
   3  15   1  220.48    8.50
  -3  15  -1  221.38    9.50
  -3  15  -1  197.78    5.90
  -3  15  -1  205.78    6.60
  -4 -15  -1   63.29    4.20
   4 -15   1   59.89    3.80
   4 -15   1   62.19    4.10
   4  15   1   62.19    4.60
   4  15   1   58.89    4.70
  -4  15  -1   80.79    3.50
   5 -15   1  203.78    7.70
  -5 -15  -1  186.58    8.40
   5 -15   1  198.08    8.10
   5  15   1  203.88    8.90
  -5  15  -1  207.18    7.30
   5  15   1  210.28    8.90
  -6 -15  -1   35.30    4.40
   6 -15   1   34.90    3.70
   6 -15   1   39.00    3.50
  -6  15  -1   36.10    2.90
   6  15   1   26.30    4.00
   6  15   1   33.50    4.20
   7 -15   1  210.38    8.90
  -7 -15  -1  178.18    9.30
   7  15   1  203.38    9.80
  -7  15  -1  207.68    7.90
  -8 -15  -1    0.00    2.90
   8 -15   1    0.80    2.50
  -8  15  -1    1.50    1.80
   8  15   1    4.40    3.10
   9 -15   1   -1.20    2.60
  -9 -15  -1    0.60    3.70
   9  15   1    0.70    3.40
  -9  15  -1    0.40    2.00
  10 -15   1    8.70    3.70
 -10 -15  -1    3.30    4.40
 -10  15  -1   15.80    3.60
  10  15   1    8.30    4.30
  11 -15   1    7.80    4.10
 -11  15  -1   12.60    3.40
 -11  16   1    8.10    3.20
  11  16  -1   10.70    4.60
 -10 -16   1    6.30    4.10
  10  16  -1    8.80    4.50
 -10  16   1    5.90    2.50
  -9 -16   1    5.00    3.30
   9 -16  -1    6.20    2.90
  -9  16   1    2.60    2.00
   9  16  -1    1.00    3.00
   8 -16  -1   14.60    2.90
   8 -16  -1   15.20    3.20
  -8 -16   1   14.40    3.60
   8  16  -1   18.70    4.40
   8  16  -1   17.80    4.10
  -8  16   1   18.40    2.90
   7 -16  -1   34.60    4.00
  -7 -16   1   32.40    4.00
   7 -16  -1   27.30    3.70
  -7  16   1   29.80    2.90
   7  16  -1   23.30    4.20
   7  16  -1   33.00    4.80
   6 -16  -1   67.59    4.40
   6 -16  -1   67.99    4.60
  -6 -16   1   69.69    4.60
   6  16  -1   61.99    5.90
   6  16  -1   64.49    5.40
  -6  16   1   75.19    3.80
   5 -16  -1    4.00    1.80
   5 -16  -1    4.90    1.70
  -5 -16   1    7.80    1.90
   5  16  -1    6.50    2.50
  -5  16   1    7.40    1.50
   5  16  -1    2.10    2.10
  -4 -16   1  152.28    6.00
   4 -16  -1  157.98    6.80
   4 -16  -1  161.88    6.70
   4  16  -1  150.68    7.20
  -4  16   1  153.78    5.40
   4  16  -1  152.68    7.50
   3 -16  -1   55.79    4.00
  -3 -16   1   55.59    2.90
   3  16  -1   51.49    4.50
  -3  16   1   58.29    2.80
  -3  16   1   59.49    1.80
  -3  16   1   62.99    4.60
   3  16  -1   56.69    4.60
  -2 -16   1   57.39    2.70
   2 -16  -1   56.89    3.80
   2  16  -1   61.39    4.70
   2  16  -1   62.39    4.90
   2  16  -1   64.09    2.00
  -2  16   1   62.89    2.80
  -2  16   1   62.89    4.40
   1 -16  -1  121.39    5.80
   1 -16  -1  111.39    4.10
  -1 -16   1  124.39    4.00
  -1 -16   1  127.39    5.90
   1  16  -1  131.79    6.40
   1  16  -1  130.69    3.80
  -1  16   1  123.39    4.20
  -1  16   1  120.69    6.10
   0 -16   1  240.88    6.40
   0 -16  -1  234.88    7.60
   0 -16   1  213.58    8.90
   0 -16  -1  240.98    8.90
   0  16  -1  249.28    6.80
   0  16   1  234.48    6.80
   0  16   1  235.88    8.90
   0  16  -1  236.78    9.40
   1 -16   1  289.97   10.70
  -1 -16  -1  288.47   10.30
  -1 -16  -1  278.17    9.30
   1 -16   1  310.07    7.50
  -1  16  -1  296.97   11.00
   1  16   1  297.37    8.20
  -1  16  -1  302.17    8.40
   1  16   1  293.67   10.70
  -2 -16  -1  188.58    7.60
  -2 -16  -1  172.28    6.70
   2 -16   1  171.98    7.20
  -2  16  -1  180.88    8.40
  -2  16  -1  174.48    5.70
   2  16   1  180.78    5.20
   2  16   1  178.28    7.60
  -3 -16  -1  117.39    5.90
   3 -16   1  118.99    5.70
  -3 -16  -1  114.69    5.50
  -3  16  -1  113.09    4.40
   3  16   1  115.89    6.10
  -3  16  -1  116.19    7.10
   3  16   1  125.29    3.80
  -4 -16  -1  105.69    5.60
  -4 -16  -1   95.09    5.40
   4 -16   1  114.09    5.40
   4 -16   1  113.49    5.70
   4  16   1  109.79    6.30
   4  16   1  112.49    6.20
  -4  16  -1  106.29    4.40
   5 -16   1    7.20    2.00
  -5 -16  -1    7.40    2.60
   5 -16   1    4.30    1.90
   5  16   1    3.50    2.30
   5  16   1   10.90    3.00
  -5  16  -1    5.50    1.50
   6 -16   1  193.78    7.80
  -6 -16  -1  180.58    8.90
   6 -16   1  186.38    8.20
  -6  16  -1  175.48    7.00
   6  16   1  192.18    9.10
   6  16   1  197.28    8.90
   7 -16   1    4.00    2.40
  -7 -16  -1    2.60    3.00
   7  16   1    2.70    2.70
  -7  16  -1    4.00    1.80
   8 -16   1    2.40    2.30
  -8 -16  -1    4.10    3.40
   8  16   1    1.50    2.90
  -8  16  -1   -1.00    2.00
  -9 -16  -1    8.90    4.30
   9 -16   1    6.50    3.40
   9  16   1    7.60    3.90
  -9  16  -1   12.50    3.00
 -10 -16  -1    3.20    4.80
  10 -16   1    2.30    3.40
  10  16   1    6.30    4.00
 -10  16  -1    5.50    2.90
  11  17  -1    6.80    4.70
 -11  17   1    2.80    2.60
 -10 -17   1   -3.60    3.80
  10  17  -1    1.50    3.50
 -10  17   1    2.90    2.60
   9 -17  -1    6.80    2.80
  -9 -17   1    4.20    3.70
   9  17  -1    3.40    3.20
  -9  17   1    5.20    2.20
   8 -17  -1   13.20    3.20
   8 -17  -1   17.70    3.40
  -8 -17   1   14.30    3.70
   8  17  -1   19.00    4.40
   8  17  -1   15.90    4.20
  -8  17   1   14.10    2.50
  -7 -17   1    8.80    2.70
   7 -17  -1    7.70    2.70
   7 -17  -1   13.20    2.90
   7  17  -1   11.90    3.60
   7  17  -1   13.00    3.40
  -7  17   1    6.50    2.10
   6 -17  -1   57.69    4.40
  -6 -17   1   53.29    4.10
   6 -17  -1   46.60    4.10
  -6  17   1   47.20    3.10
   6  17  -1   50.59    5.50
   6  17  -1   56.19    5.80
  -5 -17   1   60.09    3.90
   5 -17  -1   65.09    4.40
   5 -17  -1   70.59    4.60
   5  17  -1   65.79    5.10
   5  17  -1   60.79    5.20
  -5  17   1   63.59    3.40
   4 -17  -1    8.80    2.10
   4 -17  -1    6.70    2.00
  -4 -17   1    9.80    1.90
  -4  17   1    4.60    1.20
   4  17  -1    8.90    2.90
   4  17  -1    9.10    2.50
  -3 -17   1   26.30    2.10
   3 -17  -1   24.30    2.90
   3  17  -1   25.90    3.60
  -3  17   1   21.40    3.40
   3  17  -1   22.70    3.30
  -3  17   1   32.70    2.10
  -2 -17   1  310.37    9.00
  -2 -17   1  299.77   10.80
   2 -17  -1  300.57   10.60
   2  17  -1  330.37    8.30
   2  17  -1  310.07   11.40
  -2  17   1  313.07    9.20
  -2  17   1  324.67   11.80
   1 -17  -1  204.78    6.20
  -1 -17   1  194.68    8.10
   1 -17  -1  203.08    8.10
  -1 -17   1  201.08    6.00
   1  17  -1  211.78    5.80
  -1  17   1  200.58    6.20
  -1  17   1  205.08    8.40
   1  17  -1  212.38    8.80
   0 -17  -1  256.17    8.60
   0 -17  -1  283.47   10.20
   0 -17   1  286.07    7.50
   0 -17   1  282.57   10.20
   0  17   1  281.07   10.50
   0  17   1  289.47    8.10
   0  17  -1  293.07    8.00
   0  17  -1  283.37   10.90
  -1 -17  -1  261.27   10.10
   1 -17   1  277.87   10.10
  -1 -17  -1  261.17    9.00
   1 -17   1  290.57    7.10
   1  17   1  281.07    7.90
   1  17   1  266.37   10.20
  -1  17  -1  290.87   11.10
  -1  17  -1  285.77    8.10
   2 -17   1   40.00    3.90
  -2 -17  -1   40.80    3.70
  -2 -17  -1   38.80    3.20
  -2  17  -1   41.30    2.20
   2  17   1   40.20    1.80
   2  17   1   37.90    3.70
  -2  17  -1   37.20    4.30
   3 -17   1   61.99    4.30
  -3 -17  -1   64.19    4.40
  -3 -17  -1   58.09    3.90
   3  17   1   67.99    4.70
  -3  17  -1   66.09    3.10
  -3  17  -1   70.09    5.50
   3  17   1   67.09    2.50
   4 -17   1   39.90    3.40
  -4 -17  -1   40.40    3.70
  -4 -17  -1   40.70    4.00
   4 -17   1   37.90    3.60
   4  17   1   40.50    4.00
  -4  17  -1   38.40    2.50
  -5 -17  -1   61.19    4.90
   5 -17   1   73.49    4.60
   5 -17   1   64.29    4.60
  -5  17  -1   65.79    3.60
   5  17   1   64.49    5.50
   5  17   1   72.79    5.50
   6 -17   1   19.00    3.30
   6 -17   1   19.00    2.90
  -6 -17  -1   29.00    4.30
   6  17   1   27.10    4.10
   6  17   1   23.40    3.90
  -6  17  -1   25.40    2.70
  -7 -17  -1   12.20    3.70
   7 -17   1   20.10    3.60
  -7  17  -1   17.70    2.60
   7  17   1   22.60    4.10
  -8 -17  -1   15.10    4.40
   8 -17   1   11.40    3.30
  -8  17  -1   23.00    3.30
   8  17   1   17.60    4.30
   9 -17   1    1.90    2.50
  -9 -17  -1   -2.50    3.50
  -9  17  -1    2.50    2.20
   9  17   1   -2.90    3.10
 -10 -17  -1    6.70    4.80
  10 -17   1    0.30    3.30
  10  17   1    0.30    3.90
 -10  17  -1    5.60    2.70
 -11  18   1    8.70    3.30
  11  18  -1   -0.10    3.70
 -10 -18   1    6.30    4.10
 -10  18   1    4.10    2.40
  10  18  -1    0.40    3.50
  -9 -18   1    9.30    3.60
   9 -18  -1   12.20    3.40
  -9  18   1   13.10    2.90
   9  18  -1   10.70    4.20
   8 -18  -1   52.19    4.80
   8 -18  -1   43.90    4.40
  -8 -18   1   45.50    4.90
   8  18  -1   48.70    6.10
  -8  18   1   52.99    3.90
   8  18  -1   48.20    6.20
   7 -18  -1    3.50    2.10
  -7 -18   1   -0.20    2.10
   7 -18  -1    2.20    2.30
   7  18  -1    4.30    2.90
  -7  18   1   -0.60    1.60
   7  18  -1    0.30    2.60
  -6 -18   1   31.20    3.50
   6 -18  -1   33.10    3.90
   6 -18  -1   31.30    3.70
   6  18  -1   32.70    4.50
   6  18  -1   29.40    4.40
  -6  18   1   33.70    2.70
  -5 -18   1   52.29    3.70
   5 -18  -1   52.59    4.20
   5 -18  -1   48.60    4.00
   5  18  -1   58.49    5.30
   5  18  -1   45.50    4.70
  -5  18   1   50.49    3.10
  -4 -18   1  102.09    4.90
   4 -18  -1  112.69    5.70
   4 -18  -1  114.79    6.00
  -4  18   1  111.99    6.80
   4  18  -1  103.79    6.30
  -4  18   1  108.59    4.40
   4  18  -1  119.59    7.10
  -3 -18   1   92.59    4.10
   3 -18  -1   90.79    5.00
   3  18  -1   89.09    5.60
   3  18  -1   99.49    6.10
  -3  18   1   88.09    3.80
  -3  18   1   86.59    5.70
  -2 -18   1  176.98    7.70
   2 -18  -1  163.98    7.30
  -2 -18   1  176.98    5.90
   2  18  -1  189.38    8.40
   2  18  -1  198.78    5.30
  -2  18   1  187.88    6.10
  -2  18   1  193.78    8.70
  -1 -18   1   60.09    4.40
   1 -18  -1   53.19    4.20
  -1 -18   1   60.89    2.60
   1 -18  -1   54.29    2.60
   1  18  -1   64.09    2.40
  -1  18   1   57.69    2.60
  -1  18   1   68.39    4.90
   1  18  -1   67.19    4.90
   0 -18   1   45.00    1.90
   0 -18  -1   41.70    2.90
   0 -18  -1   39.30    4.20
   0 -18   1   39.50    4.00
   0  18   1   50.99    4.30
   0  18  -1   46.10    2.10
   0  18  -1   50.69    4.40
   0  18   1   43.80    2.20
   1 -18   1   78.99    5.10
  -1 -18  -1   79.49    5.00
  -1 -18  -1   75.79    4.10
   1 -18   1   80.99    2.50
   1  18   1   82.79    5.00
  -1  18  -1   75.69    3.00
  -1  18  -1   73.49    5.30
   1  18   1   76.69    2.90
   2 -18   1  103.09    5.40
  -2 -18  -1   93.19    5.40
  -2 -18  -1   89.29    4.80
  -2  18  -1  102.19    6.40
   2  18   1  105.09    6.00
   2  18   1   99.09    3.40
  -2  18  -1   99.69    3.80
  -3 -18  -1   88.29    5.30
   3 -18   1   90.79    5.10
  -3 -18  -1   83.49    4.90
   3  18   1   97.09    3.20
   3  18   1  108.99    6.00
  -3  18  -1   97.19    4.10
  -3  18  -1   92.29    6.40
  -4 -18  -1  121.69    6.60
   4 -18   1  130.59    6.70
  -4 -18  -1  121.19    6.20
   4 -18   1  131.09    6.00
  -4  18  -1  125.49    5.00
   4  18   1  125.19    6.80
  -5 -18  -1  184.08    8.50
   5 -18   1  199.18    8.60
  -5 -18  -1  187.28    8.80
   5 -18   1  189.58    8.00
   5  18   1  191.38    8.90
   5  18   1  197.98    9.10
  -5  18  -1  190.98    7.00
   6 -18   1  178.68    7.90
   6 -18   1  182.88    8.30
  -6 -18  -1  166.48    8.80
   6  18   1  189.48    9.50
   6  18   1  199.68    9.50
  -6  18  -1  181.88    7.20
   7 -18   1   25.70    3.90
  -7 -18  -1   19.40    4.30
  -7  18  -1   32.90    3.50
   7  18   1   28.70    4.90
  -8 -18  -1    2.20    3.70
   8 -18   1    2.30    2.30
  -8  18  -1    5.00    2.10
   8  18   1    6.90    3.30
  -9 -18  -1   52.59    7.00
   9 -18   1   42.00    5.20
   9  18   1   47.40    6.50
  -9  18  -1   47.40    4.40
 -10 -18  -1   25.50    6.60
  10 -18   1   26.20    4.90
  10  18   1   29.40    5.80
 -10  18  -1   20.20    3.90
 -10 -19   1   -1.70    3.70
 -10  19   1   11.90    3.10
  10  19  -1    2.20    4.10
  -9 -19   1    6.80    3.70
  -9  19   1    8.60    2.50
   9  19  -1   10.90    4.10
   8 -19  -1   39.40    4.70
  -8 -19   1   28.50    4.50
   8 -19  -1   22.00    3.70
   8  19  -1   17.50    4.30
  -8  19   1   23.40    3.00
   8  19  -1   24.60    4.90
  -7 -19   1   38.60    4.30
   7 -19  -1   43.20    4.10
   7 -19  -1   37.90    4.40
  -7  19   1   40.20    3.50
   7  19  -1   38.70    5.30
   7  19  -1   38.70    5.20
  -6 -19   1   81.29    5.40
   6 -19  -1   76.09    5.40
   6 -19  -1   95.89    5.50
   6  19  -1   92.29    6.60
   6  19  -1   89.69    6.70
  -6  19   1   82.99    4.30
   5 -19  -1   15.70    3.10
   5 -19  -1   17.30    2.80
  -5 -19   1   17.00    2.60
  -5  19   1   15.10    2.00
   5  19  -1   21.80    4.00
   5  19  -1   14.30    3.40
  -4 -19   1   15.50    2.20
   4 -19  -1   15.70    2.90
   4  19  -1   20.90    3.70
   4  19  -1   14.40    3.30
  -4  19   1   17.90    2.00
  -4  19   1   12.60    3.40
   3 -19  -1   61.39    4.30
  -3 -19   1   56.19    3.20
   3  19  -1   60.49    4.90
  -3  19   1   60.79    3.10
   3  19  -1   55.99    5.00
  -3  19   1   60.29    4.90
  -2 -19   1   12.10    2.90
   2 -19  -1   11.60    2.50
  -2 -19   1   13.90    1.50
  -2  19   1   13.50    3.10
  -2  19   1   15.20    1.70
   2  19  -1   14.50    1.00
   2  19  -1   10.30    2.50
  -1 -19   1  341.77    9.50
   1 -19  -1  346.77   12.10
   1 -19  -1  318.47    9.40
  -1 -19   1  335.17   11.90
   1  19  -1  324.67   12.50
  -1  19   1  343.57    9.80
  -1  19   1  345.07   12.60
   1  19  -1  361.16    9.30
   0 -19   1  334.97    8.80
   0 -19  -1  315.37    9.90
   0 -19   1  321.67   11.70
   0 -19  -1  300.77   11.50
   0  19   1  337.27   12.00
   0  19  -1  324.17   12.30
   0  19  -1  331.17    9.20
   0  19   1  329.97    9.30
  -1 -19  -1   19.90    2.50
  -1 -19  -1   20.50    3.40
   1 -19   1   21.40    1.20
   1 -19   1   18.30    3.20
  -1  19  -1   14.30    3.10
  -1  19  -1   23.00    1.60
   1  19   1   21.80    1.40
   1  19   1   25.20    3.40
  -2 -19  -1   31.50    3.80
   2 -19   1   28.40    3.50
  -2 -19  -1   23.50    2.90
   2  19   1   37.00    3.80
   2  19   1   33.30    1.70
  -2  19  -1   25.20    1.90
  -2  19  -1   24.70    3.90
  -3 -19  -1   39.90    4.20
   3 -19   1   38.00    3.60
  -3 -19  -1   35.00    3.60
   3  19   1   34.20    4.00
  -3  19  -1   32.30    2.30
  -3  19  -1   30.60    4.60
   4 -19   1   64.79    4.40
  -4 -19  -1   74.09    5.10
  -4 -19  -1   64.09    4.80
   4 -19   1   67.19    4.80
   4  19   1   68.49    5.20
  -4  19  -1   69.49    3.60
   5 -19   1   30.50    3.60
  -5 -19  -1   45.70    4.90
  -5 -19  -1   24.90    3.90
   5 -19   1   30.40    3.80
  -5  19  -1   29.00    2.60
   5  19   1   34.60    4.50
  -6 -19  -1   93.99    7.00
   6 -19   1   97.79    6.40
   6 -19   1  102.59    5.90
   6  19   1   87.89    6.60
  -6  19  -1   97.89    5.00
   6  19   1   99.99    6.90
   7 -19   1    8.10    2.90
  -7 -19  -1    5.50    3.60
   7  19   1    8.10    3.40
  -7  19  -1   12.30    2.50
   8 -19   1   18.70    3.50
  -8 -19  -1   17.10    4.60
   8  19   1   19.80    4.70
  -8  19  -1   14.40    2.80
   9 -19   1   18.00    3.80
  -9 -19  -1   14.20    5.10
  -9  19  -1   13.60    3.10
   9  19   1   20.90    5.00
 -10 -19  -1   -0.60    4.50
  10 -19   1    7.40    3.80
  10  19   1    4.30    4.20
 -10  19  -1    6.40    2.80
 -10 -20   1   11.50    4.70
 -10  20   1   15.10    3.40
  10  20  -1   14.30    4.80
  -9 -20   1    0.50    3.10
  -9  20   1    1.90    2.00
   9  20  -1    1.20    3.30
  -8 -20   1   24.90    4.40
   8 -20  -1   27.90    4.10
   8 -20  -1   31.20    4.20
  -8  20   1   27.80    3.30
   8  20  -1   31.90    5.30
   8  20  -1   15.80    4.60
   7 -20  -1   24.40    3.70
  -7 -20   1   18.80    3.60
   7 -20  -1   10.90    2.80
   7  20  -1   16.10    3.90
   7  20  -1   24.50    4.40
  -7  20   1   16.20    2.50
   6 -20  -1   18.10    3.30
   6 -20  -1   17.80    3.30
  -6 -20   1   18.00    3.10
   6  20  -1   19.80    4.40
  -6  20   1   18.00    2.50
   6  20  -1   19.30    4.10
   5 -20  -1  142.69    7.30
   5 -20  -1  139.79    7.10
  -5 -20   1  133.99    6.30
  -5  20   1  130.19    5.40
   5  20  -1  128.09    7.70
   5  20  -1  161.28    8.70
  -4 -20   1   60.29    3.60
   4 -20  -1   55.79    4.40
  -4  20   1   60.09    5.40
   4  20  -1   57.79    5.50
  -4  20   1   55.99    3.10
   4  20  -1   58.09    5.10
  -3 -20   1  119.79    4.90
  -3 -20   1  120.39    6.60
   3 -20  -1  114.49    6.20
  -3  20   1  128.89    4.80
  -3  20   1  119.69    7.20
   3  20  -1  108.99    6.70
   3  20  -1  120.19    7.20
  -2 -20   1  117.39    6.70
   2 -20  -1  122.09    6.50
  -2 -20   1  128.79    4.80
   2  20  -1  114.99    6.90
   2  20  -1  135.79    3.90
  -2  20   1  130.39    4.70
  -2  20   1  135.29    7.20
   1 -20  -1  114.79    4.30
  -1 -20   1  114.69    6.40
   1 -20  -1  112.49    6.30
  -1 -20   1  122.19    4.30
   1  20  -1  123.19    6.90
  -1  20   1  124.69    4.40
   1  20  -1  125.89    4.00
  -1  20   1  134.99    7.10
   0 -20  -1  159.78    7.50
   0 -20   1  143.99    7.40
   0 -20  -1  141.39    5.70
   0 -20   1  159.78    4.80
   0  20   1  165.58    5.30
   0  20  -1  170.18    5.30
   0  20   1  176.28    8.20
   0  20  -1  169.18    8.20
  -1 -20  -1  397.86   12.60
  -1 -20  -1  410.56   13.80
   1 -20   1  404.66   14.00
   1  20   1  464.25   15.50
   1  20   1  427.76   11.80
  -1  20  -1  441.06   12.20
  -1  20  -1  442.16   15.80
  -2 -20  -1   45.10    3.60
  -2 -20  -1   37.40    4.30
   2 -20   1   44.00    4.40
  -2  20  -1   47.30    2.50
   2  20   1   40.20    4.10
   2  20   1   39.60    1.90
  -2  20  -1   43.60    4.90
  -3 -20  -1   75.79    4.80
   3 -20   1   74.29    5.00
  -3 -20  -1   74.39    5.30
   3  20   1   76.69    5.50
  -3  20  -1   72.99    6.00
  -3  20  -1   79.69    3.70
   4 -20   1  108.69    6.20
   4 -20   1  110.39    5.90
  -4 -20  -1  100.59    5.80
  -4 -20  -1  100.09    6.10
  -4  20  -1  105.59    4.70
   4  20   1  110.79    6.70
  -5 -20  -1   21.00    3.70
   5 -20   1   35.30    4.40
  -5 -20  -1   22.40    3.90
   5 -20   1   23.30    3.40
   5  20   1   28.70    4.30
  -5  20  -1   28.30    2.60
  -6 -20  -1   28.10    4.10
  -6 -20  -1   38.80    5.20
   6 -20   1   39.50    4.10
   6 -20   1   38.80    4.40
   6  20   1   38.10    5.10
  -6  20  -1   35.80    3.20
  -7 -20  -1   17.50    4.20
   7 -20   1   19.40    3.80
   7  20   1   22.20    4.30
  -7  20  -1   25.90    3.20
   8 -20   1   22.20    4.00
  -8 -20  -1   13.50    4.50
   8  20   1   28.80    5.30
  -8  20  -1   23.70    3.60
   9 -20   1   25.00    4.40
  -9 -20  -1   12.60    5.00
   9  20   1   13.30    4.60
  -9  20  -1   18.40    3.30
  10 -20   1   16.60    4.50
 -10 -20  -1    4.20    5.70
 -10  20  -1    8.40    3.30
  10  20   1   14.60    5.50
 -10 -21   1    5.80    4.80
 -10  21   1    5.50    2.70
  10  21  -1    7.10    4.50
  -9 -21   1    0.70    3.40
   9  21  -1    0.40    3.20
  -9  21   1    3.50    2.30
  -8 -21   1   13.20    3.70
   8 -21  -1   17.40    3.80
   8 -21  -1   14.60    3.50
   8  21  -1   10.00    4.30
   8  21  -1   31.20    5.50
  -8  21   1   16.30    2.90
  -7 -21   1    5.50    2.80
   7 -21  -1   10.00    2.70
   7 -21  -1    4.30    2.30
  -7  21   1    5.10    1.90
   7  21  -1    5.60    3.20
   7  21  -1    9.30    3.90
   6 -21  -1    3.80    2.20
  -6 -21   1    3.10    2.20
   6 -21  -1    8.70    2.80
   6  21  -1    1.90    2.90
  -6  21   1    2.10    1.60
   6  21  -1    0.80    2.80
   5 -21  -1   31.60    4.00
  -5 -21   1   32.90    3.40
   5 -21  -1   28.50    3.70
  -5  21   1   28.80    2.60
   5  21  -1   33.90    4.70
   5  21  -1   20.90    4.20
   4 -21  -1    3.60    2.10
  -4 -21   1    4.40    1.70
   4  21  -1    5.10    2.90
   4  21  -1   -0.10    2.10
  -4  21   1    3.00    2.50
  -4  21   1    4.20    1.40
  -3 -21   1   39.00    2.70
   3 -21  -1   34.80    3.70
  -3 -21   1   32.10    4.10
  -3  21   1   28.80    4.10
  -3  21   1   36.60    2.40
   3  21  -1   24.70    3.90
   2 -21  -1  191.08    8.80
  -2 -21   1  209.48    6.80
  -2 -21   1  202.48    8.90
  -2  21   1  201.68    6.70
  -2  21   1  203.58    9.50
   2  21  -1  214.18    9.80
   2  21  -1  220.68    6.00
  -1 -21   1  202.38    6.30
   1 -21  -1  201.08    8.90
  -1 -21   1  182.68    8.50
   1 -21  -1  181.58    6.30
  -1  21   1  202.58    6.40
  -1  21   1  196.28    9.10
   1  21  -1  199.88    9.40
   1  21  -1  199.88    5.90
   0 -21   1  222.58    9.70
   0 -21   1  233.28    6.70
   0 -21  -1  210.38    9.50
   0 -21  -1  222.88    7.70
   0  21   1  220.48    6.70
   0  21  -1  229.38    6.70
   0  21   1  218.88    9.70
   0  21  -1  222.08   10.00
  -1 -21  -1   30.80    4.10
   1 -21   1   48.80    4.50
  -1 -21  -1   37.90    3.40
  -1  21  -1   37.30    4.60
   1  21   1   33.20    4.00
   1  21   1   38.10    2.00
  -1  21  -1   43.30    2.40
  -2 -21  -1  108.69    5.70
   2 -21   1  121.49    6.70
  -2 -21  -1  116.99    6.80
  -2  21  -1  122.39    4.70
   2  21   1  131.89    7.30
  -2  21  -1  122.39    7.60
   2  21   1  127.49    4.10
  -3 -21  -1   69.59    4.70
   3 -21   1   56.49    4.90
  -3 -21  -1   62.09    5.40
  -3  21  -1   64.69    5.80
  -3  21  -1   67.39    3.30
   3  21   1   52.69    5.20
  -4 -21  -1   15.10    3.30
  -4 -21  -1   20.40    3.70
   4 -21   1   17.40    3.20
   4 -21   1   19.00    3.00
  -4  21  -1   17.70    4.00
  -4  21  -1   21.50    2.40
   4  21   1   22.00    3.90
   5 -21   1   26.00    3.60
   5 -21   1   31.30    4.20
  -5 -21  -1   30.50    4.40
  -5 -21  -1   20.80    3.70
   5  21   1   25.90    4.20
  -5  21  -1   21.00    2.50
   6 -21   1   45.70    4.60
   6 -21   1   45.20    4.40
  -6 -21  -1   32.00    4.30
  -6 -21  -1   51.89    5.90
  -6  21  -1   45.50    3.50
   6  21   1   41.50    5.40
   7 -21   1   41.00    5.20
  -7 -21  -1   46.20    6.00
  -7  21  -1   43.10    3.70
   7  21   1   42.70    5.80
   8 -21   1   13.40    3.40
  -8 -21  -1   15.40    4.70
  -8  21  -1   16.70    3.00
   8  21   1   11.10    4.30
   9 -21   1    9.00    3.50
  -9 -21  -1    7.80    4.70
   9  21   1    8.00    4.20
  -9  21  -1   18.20    3.40
 -10 -21  -1    2.20    4.90
  10 -21   1   -1.30    3.20
  10  21   1    1.00    4.10
 -10  21  -1   -1.00    2.30
 -10 -22   1   14.60    5.50
  10  22  -1   14.70    5.50
 -10  22   1   12.20    3.20
  -9 -22   1   -0.70    3.30
  -9  22   1    0.90    2.00
   9  22  -1    0.80    3.50
   8 -22  -1    7.40    3.00
   8 -22  -1    8.40    3.10
  -8 -22   1    0.30    3.20
   8  22  -1    8.20    3.70
  -8  22   1    5.60    2.20
   8  22  -1    5.10    4.00
   7 -22  -1    8.00    2.80
   7 -22  -1    4.60    2.60
  -7 -22   1    4.80    2.70
  -7  22   1    5.00    1.90
   7  22  -1   -0.90    3.30
   7  22  -1    9.00    3.60
   6 -22  -1    0.30    2.30
  -6 -22   1    1.30    2.20
   6 -22  -1    3.40    2.30
   6  22  -1    0.70    3.20
   6  22  -1    1.80    2.80
  -6  22   1    2.20    1.60
   5 -22  -1   19.70    3.30
   5 -22  -1   20.30    3.30
  -5 -22   1   18.00    3.10
   5  22  -1   13.00    3.60
   5  22  -1   22.60    4.70
  -5  22   1   19.00    2.30
   4 -22  -1   72.19    5.50
  -4 -22   1   76.79    5.90
  -4 -22   1   81.39    4.50
  -4  22   1   88.49    7.00
   4  22  -1   72.69    6.80
  -4  22   1   87.59    4.10
   4  22  -1   73.89    6.10
  -3 -22   1  142.09    5.70
   3 -22  -1  129.89    6.90
  -3 -22   1  129.09    7.30
  -3  22   1  132.59    5.10
  -3  22   1  124.59    7.90
   3  22  -1  138.79    7.80
  -2 -22   1  127.99    7.20
  -2 -22   1  131.99    5.10
   2 -22  -1  135.59    7.00
  -2  22   1  132.39    7.50
   2  22  -1  130.59    7.40
  -2  22   1  128.99    4.90
  -1 -22   1   54.09    2.80
   1 -22  -1   42.10    4.40
  -1 -22   1   47.80    4.70
  -1  22   1   52.49    2.70
   1  22  -1   69.49    5.40
  -1  22   1   51.59    5.10
   1  22  -1   55.89    2.40
   0 -22  -1   23.70    3.60
   0 -22  -1   30.10    2.80
   0 -22   1   30.20    1.90
   0 -22   1   31.00    4.30
   0  22  -1   32.30    1.90
   0  22  -1   42.30    4.80
   0  22   1   30.70    1.90
   0  22   1   31.80    4.30
  -1 -22  -1  457.55   15.50
   1 -22   1  453.35   15.90
  -1 -22  -1  444.96   14.00
  -1  22  -1  500.25   13.70
   1  22   1  482.45   17.10
  -1  22  -1  496.65   17.70
   1  22   1  508.75   13.30
  -2 -22  -1   30.30    4.30
   2 -22   1   29.70    3.80
  -2 -22  -1   27.30    3.10
  -2  22  -1   29.40    2.10
  -2  22  -1   27.60    4.30
   2  22   1   36.10    4.50
   2  22   1   32.30    1.80
   3 -22   1   61.19    4.80
  -3 -22  -1   54.19    4.60
  -3 -22  -1   52.89    4.90
  -3  22  -1   59.99    3.30
  -3  22  -1   58.59    5.80
   3  22   1   64.19    5.30
   4 -22   1    0.70    1.90
  -4 -22  -1    0.50    2.30
  -4 -22  -1    0.10    2.50
  -4  22  -1    3.00    1.40
  -4  22  -1    2.20    3.40
   4  22   1    2.00    2.40
   5 -22   1   37.20    4.60
  -5 -22  -1   29.20    4.30
   5 -22   1   25.70    3.70
  -5 -22  -1   24.10    4.10
  -5  22  -1   28.70    2.90
   5  22   1   20.70    4.10
  -6 -22  -1   32.10    4.30
   6 -22   1   24.40    3.90
   6 -22   1   26.50    3.60
  -6 -22  -1   25.80    4.70
  -6  22  -1   33.70    3.20
   6  22   1   34.40    5.10
   7 -22   1   58.09    5.80
  -7 -22  -1   50.19    6.30
  -7  22  -1   66.99    4.60
   7  22   1   65.89    6.60
  -8 -22  -1   16.70    5.20
   8 -22   1   19.30    4.00
  -8  22  -1   12.90    2.90
   8  22   1   13.50    4.30
   9 -22   1   23.90    4.70
  -9 -22  -1   21.40    5.80
  -9  22  -1   29.10    4.00
   9  22   1   16.60    5.10
  10 -22   1   14.90    4.10
  10  22   1   19.80    5.70
 -10  22  -1   23.70    4.50
 -10 -23   1   -0.80    4.20
  10  23  -1    4.70    4.40
 -10  23   1   -1.80    2.20
  -9 -23   1   10.60    4.40
  -9  23   1   11.90    2.80
   9  23  -1   11.20    4.90
   8 -23  -1   -1.00    2.40
   8 -23  -1   -1.90    2.40
  -8 -23   1    0.40    3.20
   8  23  -1   -0.10    3.10
  -8  23   1    0.90    1.90
   8  23  -1   -0.70    3.50
   7 -23  -1   90.79    6.50
   7 -23  -1   95.79    6.40
  -7 -23   1  103.59    7.00
   7  23  -1   99.39    7.90
  -7  23   1  103.59    5.30
   7  23  -1  113.79    8.20
   6 -23  -1   39.60    4.50
   6 -23  -1   26.50    3.90
  -6 -23   1   32.00    4.00
   6  23  -1   32.80    5.30
  -6  23   1   26.00    2.90
   6  23  -1   28.40    5.20
   5 -23  -1    4.70    2.30
   5 -23  -1    6.20    2.40
  -5 -23   1    6.60    2.40
   5  23  -1    4.40    3.70
  -5  23   1    3.90    1.60
   5  23  -1    5.00    3.10
  -4 -23   1    9.30    3.10
   4 -23  -1    5.60    2.50
  -4 -23   1   10.10    2.10
  -4  23   1   12.50    2.10
   4  23  -1   13.10    3.70
  -4  23   1   11.00    3.60
  -3 -23   1   32.80    2.70
   3 -23  -1   25.40    3.70
  -3 -23   1   29.60    4.30
  -3  23   1   33.70    2.40
  -3  23   1   30.60    4.70
   3  23  -1   22.30    4.10
  -2 -23   1   41.20    2.80
   2 -23  -1   35.60    4.20
  -2 -23   1   31.00    4.20
  -2  23   1   42.60    5.00
  -2  23   1   41.90    2.60
   2  23  -1   32.80    4.50
   1 -23  -1  343.97   13.50
  -1 -23   1  377.16   10.80
  -1 -23   1  383.86   14.30
  -1  23   1  382.16   11.00
   1  23  -1  395.86   10.60
   1  23  -1  404.36   15.00
  -1  23   1  367.36   14.40
   0 -23  -1   31.50    4.10
   0 -23  -1   31.20    2.90
   0 -23   1   29.30    4.20
   0  23  -1   30.60    2.00
   0  23  -1   28.90    4.30
   0  23   1   31.30    1.90
   0  23   1   32.70    4.30
   1 -23   1    6.50    2.70
  -1 -23  -1    4.80    2.00
  -1 -23  -1    6.80    2.80
  -1  23  -1    1.50    2.50
   1  23   1    4.90    2.50
  -1  23  -1    5.80    1.20
   2 -23   1   12.50    3.10
  -2 -23  -1   17.20    3.50
  -2 -23  -1   19.90    3.10
   2  23   1   24.50    3.90
  -2  23  -1   24.80    2.10
   2  23   1   22.70    1.50
  -2  23  -1   14.70    3.50
  -3 -23  -1   53.59    5.50
   3 -23   1   43.40    4.70
  -3 -23  -1   48.50    4.60
  -3  23  -1   39.60    2.70
   3  23   1   49.30    5.00
  -3  23  -1   46.30    5.90
  -4 -23  -1   73.79    5.90
   4 -23   1   70.09    5.20
  -4 -23  -1   70.09    5.40
  -4  23  -1   75.39    7.00
  -4  23  -1   67.99    3.80
   4  23   1   76.09    6.10
  -5 -23  -1   63.59    6.10
   5 -23   1   75.19    5.80
   5 -23   1   68.99    5.40
  -5 -23  -1   54.09    5.30
   5  23   1   70.89    6.30
  -5  23  -1   68.69    4.10
   6 -23   1   31.40    4.50
  -6 -23  -1   30.10    4.40
  -6 -23  -1   38.70    5.30
   6 -23   1   27.30    3.70
   6  23   1   26.90    4.70
  -6  23  -1   30.80    3.30
  -7 -23  -1    9.00    4.00
   7 -23   1    9.10    3.20
   7  23   1   10.20    3.60
  -7  23  -1    3.90    2.10
   8 -23   1    5.50    3.00
  -8 -23  -1    6.90    4.10
  -8  23  -1    5.60    2.40
   8  23   1    4.40    3.60
  -9 -23  -1   23.90    5.90
   9 -23   1   26.70    4.90
   9  23   1   35.00    6.50
  -9  23  -1   37.90    4.70
  10 -23   1   15.90    4.50
  10  24  -1   31.30    6.60
 -10  24   1   12.00    3.30
  -9 -24   1   -1.30    3.60
   9  24  -1    5.10    4.00
  -9  24   1    3.60    2.30
  -8 -24   1   -4.90    2.60
   8 -24  -1    4.80    3.10
   8 -24  -1    3.60    2.60
  -8  24   1    0.30    2.10
   8  24  -1    1.90    3.70
   8  24  -1   -2.70    3.10
  -7 -24   1    5.70    3.10
   7 -24  -1    3.00    2.70
   7 -24  -1    3.20    2.70
  -7  24   1    4.70    1.90
   7  24  -1    8.20    3.70
   7  24  -1    4.40    3.60
   6 -24  -1   17.50    3.40
  -6 -24   1   15.80    3.40
   6 -24  -1   16.50    3.60
  -6  24   1   13.00    2.20
   6  24  -1   18.60    4.70
   6  24  -1   15.40    4.50
  -5 -24   1   52.49    6.00
   5 -24  -1   56.69    5.00
   5 -24  -1   55.99    5.20
  -5 -24   1   56.19    4.50
   5  24  -1   55.99    6.40
  -5  24   1   56.99    3.60
   5  24  -1   46.90    5.80
  -4 -24   1   73.79    4.50
  -4 -24   1   57.19    5.70
   4 -24  -1   60.89    5.10
  -4  24   1   66.09    3.80
  -4  24   1   64.69    6.60
   4  24  -1   82.79    6.60
  -3 -24   1  189.68    7.30
  -3 -24   1  179.28    9.10
   3 -24  -1  183.68    8.90
  -3  24   1  182.88    9.80
   3  24  -1  197.38    9.80
  -3  24   1  184.78    6.60
  -2 -24   1   83.39    6.30
   2 -24  -1   93.99    6.20
  -2 -24   1   95.89    4.40
   2  24  -1   94.69    6.80
  -2  24   1  102.69    7.10
  -2  24   1   97.79    4.10
  -1 -24   1    6.60    1.50
   1 -24  -1    4.00    2.50
  -1 -24   1    4.40    2.70
  -1  24   1    7.30    2.80
  -1  24   1    7.30    1.20
   1  24  -1    4.20    2.60
   0 -24   1   86.09    6.30
   0 -24  -1   90.29    6.60
   0  24  -1   90.29    6.70
   0  24  -1  105.99    3.90
   0  24   1   92.19    6.50
   0  24   1   95.59    3.80
   1 -24   1   25.50    4.10
  -1 -24  -1   29.40    3.30
  -1 -24  -1   30.10    4.20
   1  24   1   35.30    4.50
  -1  24  -1   30.70    4.50
  -1  24  -1   32.70    2.30
   1  24   1   32.00    1.90
   2 -24   1    8.30    3.00
  -2 -24  -1   13.40    3.40
  -2 -24  -1   13.80    2.90
   2  24   1   16.70    3.60
  -2  24  -1   11.00    3.50
  -2  24  -1   15.90    1.80
  -3 -24  -1   10.90    3.50
  -3 -24  -1   13.50    3.00
   3 -24   1   14.90    3.20
   3  24   1   10.70    3.30
  -3  24  -1   14.70    2.00
  -3  24  -1   14.50    4.10
  -4 -24  -1    2.40    2.90
   4 -24   1    1.50    2.20
  -4 -24  -1    4.90    3.20
  -4  24  -1    2.60    3.70
  -4  24  -1    1.00    1.40
   4  24   1    2.60    2.70
  -5 -24  -1    6.40    3.40
   5 -24   1    2.30    2.50
  -5 -24  -1    5.20    3.20
   5 -24   1    3.10    2.30
  -5  24  -1   14.20    2.30
   5  24   1    6.80    3.40
  -6 -24  -1   22.70    4.60
  -6 -24  -1   25.10    4.40
   6 -24   1   23.60    3.80
   6 -24   1   30.40    4.60
  -6  24  -1   25.50    3.10
   6  24   1   19.10    4.30
   7 -24   1   31.50    4.60
  -7 -24  -1   31.90    5.50
  -7  24  -1   32.70    3.70
   7  24   1   34.20    5.40
   8 -24   1   15.50    4.30
  -8 -24  -1   10.40    4.60
  -8  24  -1   10.10    2.70
   8  24   1   11.60    4.30
  -9 -24  -1    3.00    4.60
   9 -24   1    5.80    3.30
   9  24   1    6.80    4.30
  -9  24  -1    6.40    3.10
  10 -24   1    0.60    3.20
  10  25  -1   39.60    7.10
  -9 -25   1   18.20    5.20
  -9  25   1   19.40    3.40
   9  25  -1   16.10    5.40
   8 -25  -1   25.60    4.50
  -8 -25   1   13.80    4.30
   8 -25  -1   19.50    4.10
   8  25  -1   29.10    5.90
  -8  25   1   19.00    3.10
   8  25  -1   18.10    5.10
   7 -25  -1   14.00    3.60
   7 -25  -1   11.50    3.20
  -7 -25   1    9.70    3.40
  -7  25   1    8.70    2.30
   7  25  -1    6.10    3.60
   7  25  -1    2.50    3.40
   6 -25  -1   14.30    3.10
   6 -25  -1   11.90    3.10
  -6 -25   1   15.10    3.40
   6  25  -1   16.20    4.40
  -6  25   1   21.90    2.80
   6  25  -1   14.00    4.50
  -5 -25   1   42.50    4.50
  -5 -25   1   46.30    5.80
   5 -25  -1   55.29    5.30
   5 -25  -1   51.49    5.20
   5  25  -1   53.29    6.40
  -5  25   1   52.69    3.70
  -4 -25   1   36.70    3.40
   4 -25  -1   36.90    4.50
  -4 -25   1   38.90    5.10
  -4  25   1   36.20    5.40
  -4  25   1   38.40    2.90
   4  25  -1   34.30    5.20
  -3 -25   1    8.60    2.10
   3 -25  -1    2.10    2.40
  -3 -25   1    9.80    3.50
  -3  25   1    2.70    2.80
  -3  25   1    9.60    1.80
   3  25  -1    3.50    2.80
  -2 -25   1   11.70    3.40
   2 -25  -1   12.00    3.10
  -2 -25   1   12.60    2.10
  -2  25   1   12.30    1.80
   2  25  -1    8.10    3.20
  -2  25   1   15.40    3.70
   1 -25  -1   20.40    3.70
  -1 -25   1   30.00    4.40
  -1 -25   1   35.20    2.60
   1  25  -1   39.20    2.10
  -1  25   1   28.60    2.10
   1  25  -1   34.80    4.80
  -1  25   1   36.40    4.80
   0 -25   1  248.48   10.90
   0 -25  -1  250.77   10.80
   0  25   1  253.17   11.60
   0  25  -1  253.67   11.90
   0  25  -1  271.17    8.10
   0  25   1  279.07    8.20
   1 -25   1   10.70    3.40
  -1 -25  -1   11.60    2.50
  -1 -25  -1   11.00    3.60
   1  25   1   16.50    1.60
  -1  25  -1    7.20    3.50
   1  25   1   12.20    3.40
  -1  25  -1   10.80    1.60
  -2 -25  -1    4.20    3.00
  -2 -25  -1   10.10    2.80
   2 -25   1    6.70    3.10
   2  25   1    4.00    2.60
  -2  25  -1    7.00    3.30
  -2  25  -1    7.00    1.50
  -3 -25  -1   11.80    3.70
   3 -25   1    3.80    2.60
  -3 -25  -1   10.90    3.10
  -3  25  -1    5.50    3.80
  -3  25  -1   13.50    1.90
   3  25   1    6.30    3.00
  -4 -25  -1   48.70    4.90
   4 -25   1   46.00    5.10
  -4 -25  -1   47.60    5.40
  -4  25  -1   59.39    7.20
  -4  25  -1   58.39    3.80
   4  25   1   60.09    6.60
  -5 -25  -1   38.30    5.10
   5 -25   1   28.20    3.90
  -5 -25  -1   28.50    4.50
   5 -25   1   46.40    5.40
   5  25   1   41.40    5.60
  -5  25  -1   44.60    3.60
   6 -25   1   21.30    3.60
   6 -25   1   27.90    4.40
  -6 -25  -1   13.10    4.00
  -6 -25  -1   24.20    4.70
   6  25   1   25.40    4.90
  -6  25  -1   20.50    2.90
  -7 -25  -1    3.10    3.60
   7 -25   1    7.10    3.30
   7  25   1    6.90    3.70
  -7  25  -1    5.40    2.20
   8 -25   1    5.60    3.50
  -8 -25  -1    0.60    4.10
  -8  25  -1    4.70    2.30
   8  25   1    3.60    3.90
   9 -25   1    7.80    3.90
  -9 -25  -1   -7.20    3.90
   9  25   1   -4.10    3.50
  -9  25  -1    4.60    2.60
  -9 -26   1    0.00    3.80
  -9  26   1    4.40    2.80
   9  26  -1    6.60    4.40
   8 -26  -1    0.20    2.70
  -8 -26   1   -5.70    2.80
   8  26  -1    3.50    3.70
  -8  26   1    1.80    2.00
   8  26  -1    7.20    4.50
  -7 -26   1   -0.60    2.80
   7 -26  -1    0.60    2.30
   7 -26  -1    3.30    2.80
  -7  26   1    4.50    2.20
   7  26  -1    0.90    3.60
   7  26  -1    9.70    4.40
   6 -26  -1   10.00    3.40
  -6 -26   1    4.80    2.80
  -6 -26   1    8.00    3.40
   6 -26  -1    7.10    3.20
  -6  26   1    6.10    2.00
   6  26  -1   14.60    4.10
  -5 -26   1   41.10    5.50
   5 -26  -1   41.40    5.00
  -5 -26   1   40.50    4.60
   5 -26  -1   39.30    5.00
   5  26  -1   42.00    6.00
  -5  26   1   40.90    3.20
  -4 -26   1   91.59    5.20
   4 -26  -1   88.09    6.60
  -4 -26   1   82.29    6.80
   4  26  -1   91.59    7.60
  -4  26   1   92.89    4.50
  -4  26   1   76.99    7.10
  -3 -26   1   28.90    4.70
   3 -26  -1   38.80    4.70
  -3 -26   1   38.50    3.50
  -3  26   1   41.40    5.80
   3  26  -1   51.29    6.00
  -3  26   1   40.40    3.00
   2 -26  -1   55.59    5.20
  -2 -26   1   56.69    3.60
  -2 -26   1   43.70    5.30
   2  26  -1   49.30    5.80
  -2  26   1   47.10    5.80
  -2  26   1   49.70    2.90
   1 -26  -1   65.09    5.70
  -1 -26   1   70.59    6.30
  -1  26   1   82.59    6.70
   1  26  -1   57.99    5.90
  -1  26   1   64.29    3.20
   1  26  -1   72.59    3.00
   0 -26   1   33.80    5.00
   0 -26  -1   36.10    4.80
   0  26   1   37.50    2.40
   0  26  -1   45.80    2.50
   0  26   1   41.70    5.20
   0  26  -1   39.00    5.10
  -1 -26  -1   22.20    4.00
  -1 -26  -1   24.00    3.30
   1 -26   1   17.40    3.90
   1  26   1   27.00    4.60
  -1  26  -1   27.70    4.70
  -1  26  -1   27.50    2.10
   1  26   1   33.10    2.00
  -2 -26  -1   81.39    7.00
   2 -26   1   77.29    6.20
  -2 -26  -1   80.29    5.50
  -2  26  -1  106.79    7.80
   2  26   1   93.39    7.40
  -2  26  -1   96.89    4.40
   3 -26   1   48.10    5.00
  -3 -26  -1   52.09    5.10
  -3 -26  -1   61.79    6.00
   3  26   1   50.79    5.90
  -3  26  -1   55.89    3.40
  -3  26  -1   54.39    6.60
  -4 -26  -1   43.10    5.20
   4 -26   1   36.20    4.50
  -4 -26  -1   38.70    5.40
  -4  26  -1   34.90    3.00
   4  26   1   35.50    5.50
  -4  26  -1   31.20    5.70
  -5 -26  -1    2.10    3.20
   5 -26   1    0.20    2.20
   5 -26   1   -0.70    2.40
  -5 -26  -1   -2.00    2.70
  -5  26  -1    2.10    1.70
   5  26   1    1.40    2.90
  -6 -26  -1   19.10    4.50
   6 -26   1   15.40    3.50
  -6 -26  -1   14.20    3.80
   6 -26   1   11.60    3.80
   6  26   1   18.90    4.50
  -6  26  -1   16.90    2.80
   7 -26   1   13.20    3.60
  -7 -26  -1   14.10    5.10
   7  26   1   21.50    5.00
  -7  26  -1   17.40    3.10
   8 -26   1   23.40    4.50
  -8 -26  -1    6.40    4.50
  -8  26  -1    9.70    3.00
   8  26   1   21.70    5.30
   9 -26   1    5.20    3.30
  -9 -26  -1    4.10    4.90
  -9  26  -1    9.50    3.20
   9  26   1    6.20    5.00
  -9 -27   1   13.50    5.10
   9  27  -1   15.30    5.30
  -9  27   1   31.60    4.10
   8 -27  -1    7.70    3.30
  -8 -27   1   18.70    4.50
  -8 -27   1    6.00    4.40
   8  27  -1   13.20    4.80
  -8  27   1   13.50    2.90
   8  27  -1   15.10    5.20
  -7 -27   1   12.70    3.80
   7 -27  -1    7.80    3.30
  -7 -27   1    7.60    4.00
   7 -27  -1   13.30    3.60
  -7  27   1    8.80    2.40
   7  27  -1    9.90    4.30
   6 -27  -1   73.69    5.90
  -6 -27   1   61.49    6.30
  -6 -27   1   57.69    5.70
   6 -27  -1   54.79    5.50
   6  27  -1   62.69    7.50
  -6  27   1   63.19    4.10
   5 -27  -1    7.30    2.80
  -5 -27   1   10.00    3.60
  -5 -27   1    2.80    2.60
   5 -27  -1    7.20    3.20
   5  27  -1    9.60    3.90
  -5  27   1    6.00    1.90
  -4 -27   1   24.50    4.80
  -4 -27   1   20.50    3.30
   4 -27  -1   17.60    3.70
  -4  27   1   25.40    2.80
   4  27  -1   19.70    4.40
  -4  27   1   16.30    4.30
  -3 -27   1    9.20    3.70
  -3 -27   1   21.80    3.00
   3 -27  -1   20.60    3.80
  -3  27   1   18.50    4.20
   3  27  -1   19.00    4.40
  -3  27   1   16.30    2.20
  -2 -27   1   18.00    4.20
   2 -27  -1   11.20    3.20
  -2 -27   1   14.40    2.40
  -2  27   1    9.10    3.40
   2  27  -1   14.30    3.90
  -2  27   1   22.00    2.30
   1 -27  -1  255.17   11.60
  -1 -27   1  268.37   12.60
  -1  27   1  273.77    8.40
   1  27  -1  250.67   12.20
  -1  27   1  258.17   12.40
   0 -27  -1   23.70    4.30
   0 -27   1   18.30    4.10
   0  27   1   24.70    2.10
   0  27   1   23.90    4.40
   0  27  -1   21.30    4.40
   0  27  -1   25.60    2.10
  -1 -27  -1   22.30    4.20
   1 -27   1   17.10    4.00
   1  27   1   29.60    2.00
   1  27   1   31.50    4.90
  -1  27  -1   27.00    4.70
  -1  27  -1   26.60    2.20
   2 -27   1   22.80    4.40
  -2 -27  -1   24.80    4.50
  -2 -27  -1   22.10    3.60
  -2  27  -1   16.80    4.20
  -2  27  -1   20.10    2.20
   2  27   1   24.70    4.40
   3 -27   1   17.20    3.60
  -3 -27  -1   16.60    3.70
  -3 -27  -1   16.10    4.00
  -3  27  -1   20.70    2.60
  -3  27  -1   15.70    4.40
   3  27   1   25.10    5.00
  -4 -27  -1   18.60    4.20
  -4 -27  -1   21.70    4.50
   4 -27   1   14.10    3.50
   4  27   1   19.90    4.40
  -4  27  -1   19.20    2.70
  -4  27  -1   15.10    4.70
   5 -27   1   15.70    3.60
  -5 -27  -1   14.10    4.00
   5 -27   1    9.90    3.00
  -5 -27  -1   13.30    3.70
   5  27   1   15.60    4.40
  -5  27  -1   15.50    2.70
   6 -27   1    8.40    3.30
  -6 -27  -1    2.50    3.30
   6 -27   1    6.80    3.00
  -6 -27  -1    7.40    4.20
   6  27   1    9.90    3.90
  -6  27  -1    8.70    2.50
  -7 -27  -1    0.40    4.10
   7 -27   1    2.10    3.20
  -7  27  -1    2.80    2.10
   7  27   1    1.60    3.40
   8 -27   1    7.80    3.50
  -8 -27  -1    7.30    4.90
   8  27   1    9.30    4.90
  -8  27  -1   11.40    2.90
   9 -27   1   37.00    6.10
  -9 -27  -1   27.50    6.70
   9  27   1   37.30    6.90
  -9  27  -1   34.10    4.70
  -9 -28   1   -0.10    4.80
   9  28  -1    2.00    4.00
  -9  28   1    3.50    2.70
   8 -28  -1    3.00    3.20
  -8 -28   1    1.90    3.60
  -8 -28   1    4.40    3.90
  -8  28   1    4.10    2.40
   8  28  -1    0.70    4.40
  -7 -28   1    2.60    3.70
   7 -28  -1    5.80    3.20
   7 -28  -1    2.30    2.90
  -7 -28   1    3.20    3.30
   7  28  -1    1.30    3.80
  -7  28   1    6.60    2.30
  -6 -28   1   31.90    4.60
  -6 -28   1   39.80    5.80
   6 -28  -1   33.30    4.80
   6 -28  -1   28.10    4.70
   6  28  -1   35.40    5.90
  -6  28   1   32.30    3.50
  -5 -28   1   46.90    6.00
  -5 -28   1   65.29    5.40
   5 -28  -1   54.39    5.80
   5 -28  -1   62.79    5.60
  -5  28   1   58.99    7.30
  -5  28   1   59.29    3.90
   5  28  -1   76.69    7.60
  -4 -28   1   78.69    5.30
  -4 -28   1   70.59    6.60
   4 -28  -1   64.19    5.80
  -4  28   1   86.99    7.90
   4  28  -1   79.59    7.70
  -3 -28   1  155.28    9.10
   3 -28  -1  136.89    8.50
  -3 -28   1  150.58    6.80
  -3  28   1  154.28    6.10
  -3  28   1  138.49    9.20
   3  28  -1  148.89    9.40
   2 -28  -1   14.00    3.70
  -2 -28   1   22.90    4.80
  -2  28   1   22.90    2.50
  -2  28   1   23.00    4.40
   2  28  -1   24.80    4.80
   1 -28  -1   29.60    4.70
  -1 -28   1   35.30    5.50
  -1  28   1   34.40    5.40
   1  28  -1   32.70    5.20
  -1  28   1   32.00    2.50
   0 -28  -1   73.39    6.50
   0 -28   1   71.49    7.10
   0  28   1   84.99    3.70
   0  28  -1   80.49    3.70
   0  28  -1   69.29    6.70
   0  28   1   82.09    6.80
  -1 -28  -1   23.50    4.80
   1 -28   1   12.90    3.80
   1  28   1   30.20    5.10
  -1  28  -1   23.00    5.00
  -1  28  -1   20.60    2.20
  -2 -28  -1   79.49    5.60
   2 -28   1   82.79    6.60
  -2 -28  -1   73.49    6.70
   2  28   1   85.19    7.00
  -2  28  -1   84.79    4.10
  -2  28  -1   79.69    7.30
  -3 -28  -1   69.09    7.10
  -3 -28  -1   66.79    5.50
   3 -28   1   81.19    6.30
  -3  28  -1   72.09    4.10
   3  28   1   77.49    6.80
  -3  28  -1   85.39    7.70
  -4 -28  -1   12.80    3.70
   4 -28   1   10.10    3.10
  -4 -28  -1    6.90    3.10
  -4  28  -1   14.40    2.40
   4  28   1   14.80    4.20
  -4  28  -1    7.90    4.00
  -5 -28  -1   14.80    4.20
   5 -28   1   12.00    3.40
  -5 -28  -1   19.90    4.60
   5 -28   1   15.80    3.90
  -5  28  -1   12.50    2.60
   5  28   1   29.60    5.20
  -6 -28  -1   23.10    4.90
   6 -28   1   28.80    4.80
   6 -28   1   27.50    4.40
  -6 -28  -1   22.90    4.50
   6  28   1   26.60    5.40
  -6  28  -1   21.60    3.30
   7 -28   1    7.00    3.30
  -7 -28  -1   11.20    4.50
   7  28   1   13.70    4.50
  -7  28  -1   11.30    2.80
   8 -28   1   10.90    4.20
  -8 -28  -1    8.70    5.50
  -8  28  -1   12.20    3.10
   8  28   1   13.80    4.90
   9 -28   1   -1.50    3.00
  -9 -28  -1    3.30    5.30
   9  28   1    5.60    5.00
  -9 -29   1   12.40    5.80
  -9  29   1    7.40    3.30
   9  29  -1   21.80    5.90
  -8 -29   1    7.10    4.30
   8 -29  -1   14.00    4.00
  -8 -29   1    4.80    4.00
  -8  29   1    6.40    2.60
   8  29  -1    7.20    4.40
  -7 -29   1   -0.20    3.20
   7 -29  -1    2.10    3.00
  -7 -29   1   -2.10    2.90
   7 -29  -1    4.80    3.30
   7  29  -1   -3.30    3.20
  -7  29   1    3.90    2.10
  -6 -29   1    6.70    3.20
   6 -29  -1   10.30    3.30
  -6 -29   1   12.30    4.40
   6 -29  -1   14.50    3.90
   6  29  -1    3.50    3.70
  -6  29   1    7.60    2.40
  -5 -29   1   48.10    4.80
   5 -29  -1   50.09    5.60
  -5 -29   1   60.39    7.00
   5 -29  -1   52.39    5.50
  -5  29   1   47.10    3.70
  -5  29   1   47.30    6.80
   5  29  -1   55.19    7.00
  -4 -29   1   74.69    5.50
  -4 -29   1   81.29    7.00
   4 -29  -1   79.39    6.60
  -4  29   1   77.79    4.50
   4  29  -1   79.59    7.40
  -4  29   1   79.69    7.90
  -3 -29   1    1.80    3.60
  -3 -29   1    1.60    2.20
   3 -29  -1    1.00    3.00
  -3  29   1    3.20    1.70
  -3  29   1    0.50    3.30
   3  29  -1   -0.20    3.40
   2 -29  -1   24.20    4.40
  -2 -29   1   36.20    5.40
   2  29  -1   35.20    5.60
  -2  29   1   36.70    2.80
  -2  29   1   27.80    5.00
  -1 -29   1   37.20    5.50
   1 -29  -1   44.20    5.40
   1  29  -1   33.00    5.30
  -1  29   1   34.20    2.70
  -1  29   1   37.60    5.40
   0 -29   1  316.57   13.60
   0 -29  -1  307.37   13.50
   0  29   1  349.27   14.90
   0  29   1  353.96   10.40
   0  29  -1  354.76   10.50
   0  29  -1  331.07   15.10
   1 -29   1   21.40    4.40
  -1 -29  -1   15.40    4.20
  -1  29  -1   26.30    5.00
  -1  29  -1   23.30    2.40
   1  29   1   27.20    5.10
   2 -29   1    9.80    3.90
  -2 -29  -1   18.60    4.70
  -2  29  -1   12.60    2.10
   2  29   1   13.50    4.00
  -2  29  -1   13.70    4.20
   3 -29   1   11.40    3.40
  -3 -29  -1   10.40    3.40
  -3 -29  -1   12.90    4.40
  -3  29  -1    5.40    3.70
   3  29   1   10.30    3.70
  -3  29  -1   10.70    2.10
  -4 -29  -1    6.10    3.40
   4 -29   1    8.50    3.20
  -4 -29  -1    9.80    3.70
   4  29   1    4.40    3.40
  -4  29  -1    3.00    4.20
  -4  29  -1   11.00    2.40
   5 -29   1   14.20    3.80
  -5 -29  -1   16.80    4.50
  -5 -29  -1   17.70    4.60
   5 -29   1   18.40    4.00
  -5  29  -1   21.00    3.00
   5  29   1   20.00    4.70
   6 -29   1   22.90    4.10
   6 -29   1   28.90    4.90
  -6 -29  -1   21.90    5.30
  -6 -29  -1   18.10    4.80
  -6  29  -1   34.40    4.00
   6  29   1   29.90    5.60
   7 -29   1   37.30    5.40
  -7 -29  -1   22.30    5.60
  -7  29  -1   34.80    4.30
   7  29   1   34.10    6.40
   8 -29   1   11.90    4.10
  -8 -29  -1   13.50    5.90
   8  29   1   17.60    5.40
  -8  29  -1   21.80    4.00
   9 -29   1    9.60    4.00
   9  30  -1    5.80    4.50
   8 -30  -1    2.50    3.30
  -8 -30   1   -1.80    4.10
  -8 -30   1    3.50    4.30
   8  30  -1    3.00    4.80
  -8  30   1    3.20    2.40
   7 -30  -1    9.50    3.70
  -7 -30   1    3.00    3.40
  -7 -30   1   16.00    4.90
   7 -30  -1    6.90    3.50
   7  30  -1   11.20    4.90
  -7  30   1    9.50    2.50
  -6 -30   1    2.40    3.20
   6 -30  -1    2.30    3.00
   6 -30  -1    0.30    2.90
  -6 -30   1    2.50    3.40
  -6  30   1    2.10    2.00
   6  30  -1    5.30    4.30
  -5 -30   1    6.00    2.90
   5 -30  -1    6.80    3.00
   5 -30  -1    7.40    3.10
  -5 -30   1    3.50    3.30
  -5  30   1    7.90    4.00
   5  30  -1   11.40    4.50
  -5  30   1   14.10    2.50
  -4 -30   1   13.90    4.20
   4 -30  -1   13.80    3.40
  -4 -30   1   10.80    3.00
   4  30  -1   16.50    4.50
  -4  30   1   15.70    2.40
  -4  30   1   11.70    4.30
  -3 -30   1   28.10    5.00
   3 -30  -1   34.30    4.80
  -3  30   1   39.30    3.20
  -3  30   1   37.20    6.00
   3  30  -1   43.10    6.50
   2 -30  -1   52.39    5.80
  -2 -30   1   51.39    6.30
  -2  30   1   47.90    6.40
   2  30  -1   57.49    7.00
  -2  30   1   58.19    3.60
   1 -30  -1   14.00    3.70
  -1 -30   1   17.20    4.40
  -1  30   1   15.30    4.20
   1  30  -1   12.00    4.10
  -1  30   1   13.90    2.00
   0 -30  -1   21.20    4.50
   0 -30   1   19.90    5.00
   0  30   1   26.10    4.90
   0  30  -1   36.00    2.70
   0  30   1   34.50    2.50
   0  30  -1   30.30    5.30
   1 -30   1   18.10    4.40
  -1 -30  -1   12.50    4.00
  -1  30  -1   21.90    5.10
   1  30   1   21.60    4.80
  -1  30  -1   17.30    2.10
   2 -30   1   98.59    7.30
  -2 -30  -1   86.09    7.20
   2  30   1   98.49    7.90
  -2  30  -1  112.09    8.60
  -2  30  -1   88.69    4.70
  -3 -30  -1   83.79    7.70
  -3 -30  -1   82.49    6.30
   3 -30   1   71.29    6.20
  -3  30  -1   85.19    4.90
  -3  30  -1   63.29    7.60
   3  30   1   84.69    7.50
  -4 -30  -1    3.80    3.40
  -4 -30  -1    0.60    3.10
   4 -30   1    6.30    3.30
   4  30   1    0.50    3.50
  -4  30  -1    7.60    4.40
  -4  30  -1    3.70    1.80
   5 -30   1   73.79    6.20
  -5 -30  -1   63.49    7.30
  -5 -30  -1   61.09    6.90
   5 -30   1   77.99    6.80
  -5  30  -1   72.09    4.80
   5  30   1   76.59    8.10
  -6 -30  -1   13.90    4.70
   6 -30   1   10.50    3.90
  -6 -30  -1   14.30    4.40
   6 -30   1    8.00    3.20
  -6  30  -1   12.70    3.10
   6  30   1   21.30    5.20
  -7 -30  -1    6.90    5.00
   7 -30   1   10.00    3.70
  -7  30  -1    6.80    2.70
   7  30   1    3.90    4.10
  -8 -30  -1   17.80    5.80
   8 -30   1   19.60    4.70
  -8  30  -1   17.80    3.60
   8  30   1   16.40    5.90
   9 -30   1    5.50    4.00
  -8 -31   1   17.70    5.80
   8 -31  -1   18.40    4.50
  -8 -31   1    6.70    4.50
   8  31  -1   20.10    5.80
  -8  31   1   15.90    3.40
  -7 -31   1   11.50    4.70
  -7 -31   1   13.70    4.80
   7 -31  -1   18.00    4.50
   7 -31  -1   22.20    4.70
  -7  31   1   21.50    3.60
   7  31  -1   10.70    4.80
  -6 -31   1    5.20    3.70
   6 -31  -1    3.40    3.30
   6 -31  -1    7.20    3.50
  -6 -31   1   -0.10    3.10
   6  31  -1    3.60    3.60
  -6  31   1    1.90    2.00
   5 -31  -1   11.40    3.40
  -5 -31   1   15.20    3.60
  -5 -31   1   11.30    4.30
   5  31  -1   10.90    4.30
  -5  31   1   15.70    2.70
  -5  31   1   15.60    5.20
  -4 -31   1   -0.30    2.30
  -4 -31   1    0.60    3.30
   4 -31  -1    4.50    2.90
   4  31  -1    7.00    4.20
  -4  31   1    1.20    3.90
  -4  31   1    0.20    1.50
  -3 -31   1   38.80    5.80
   3 -31  -1   54.19    5.60
   3  31  -1   44.70    6.40
  -3  31   1   45.70    6.70
  -3  31   1   45.70    3.40
  -2 -31   1   -1.30    3.20
   2 -31  -1   -0.70    2.70
  -2  31   1    1.20    3.10
  -2  31   1    2.70    1.50
   2  31  -1    3.10    3.40
  -1 -31   1  155.98    9.80
   1 -31  -1  177.08    9.80
  -1  31   1  170.78   10.50
  -1  31   1  174.18    6.60
   1  31  -1  195.38   11.40
   0 -31   1   29.70    5.10
   0 -31  -1   34.70    5.10
   0  31  -1   39.00    6.00
   0  31   1   38.60    5.70
   0  31   1   42.10    2.80
  -1 -31  -1   -3.70    2.80
   1 -31   1    7.60    3.60
   1  31   1    2.20    3.30
  -1  31  -1    3.40    1.40
  -1  31  -1    2.00    3.50
   2 -31   1   16.90    4.10
  -2 -31  -1   13.90    4.20
  -2  31  -1   18.40    2.50
   2  31   1   18.30    4.50
  -2  31  -1   18.00    4.80
  -3 -31  -1   78.29    7.20
   3 -31   1   91.19    7.30
  -3  31  -1   83.19    4.80
   3  31   1   78.69    7.50
  -3  31  -1   72.09    8.30
  -4 -31  -1   47.20    6.20
   4 -31   1   48.00    5.70
  -4 -31  -1   41.20    5.60
   4  31   1   41.00    6.10
  -4  31  -1   45.00    3.70
  -4  31  -1   28.10    5.90
  -5 -31  -1    4.50    3.60
  -5 -31  -1    8.90    3.90
   5 -31   1   13.90    3.70
   5 -31   1    9.80    3.90
   5  31   1    9.00    4.20
  -5  31  -1    9.50    2.40
   6 -31   1   13.70    4.00
   6 -31   1    9.30    3.20
  -6 -31  -1    9.40    4.20
  -6 -31  -1   11.70    4.40
  -6  31  -1   10.90    2.70
   6  31   1   11.60    4.50
  -7 -31  -1   15.70    5.80
   7 -31   1   22.90    5.10
  -7  31  -1   12.80    3.10
   7  31   1    3.70    4.30
   8 -31   1    2.60    3.30
  -8 -31  -1   -5.90    4.10
  -8  31  -1    0.80    2.40
   8  31   1    1.60    4.30
  -8 -32   1    3.10    5.00
   8 -32  -1    6.60    3.80
  -8  32   1    0.70    2.30
   8  32  -1    3.20    4.40
  -7 -32   1   -1.10    3.50
   7 -32  -1    6.40    3.60
  -7 -32   1    2.00    4.20
  -7  32   1   -0.40    2.10
   7  32  -1   -1.30    4.30
   6 -32  -1   35.70    5.60
  -6 -32   1   26.10    5.90
  -6 -32   1   19.30    4.40
   6 -32  -1   21.70    4.40
   6  32  -1   23.10    5.60
  -6  32   1   32.60    3.70
  -5 -32   1   20.40    4.30
   5 -32  -1   21.50    4.40
  -5 -32   1   19.40    4.90
   5  32  -1   28.80    5.90
  -5  32   1   22.60    5.70
  -5  32   1   18.00    2.80
  -4 -32   1    0.30    3.40
   4 -32  -1    5.50    3.00
  -4  32   1   -0.20    3.30
  -4  32   1    2.30    1.70
   4  32  -1    4.80    3.80
  -3 -32   1    5.10    3.70
   3 -32  -1    9.00    3.30
  -3  32   1    6.20    4.20
   3  32  -1    4.70    3.70
  -3  32   1    7.80    2.20
  -2 -32   1   65.29    6.90
   2 -32  -1   62.79    6.20
  -2  32   1   65.99    4.00
   2  32  -1   54.29    7.10
  -2  32   1   73.69    8.00
   1 -32  -1   18.80    4.20
  -1 -32   1   12.70    4.60
  -1  32   1   13.00    4.30
  -1  32   1   18.90    2.30
   1  32  -1   10.20    4.10
   0 -32   1   34.00    5.40
   0 -32  -1   41.80    5.70
   0  32  -1   42.50    6.30
   0  32   1   53.59    6.90
  -1 -32  -1    8.00    3.90
   1 -32   1    4.70    3.40
   1  32   1    7.10    3.80
  -1  32  -1    7.30    1.80
  -1  32  -1    3.80    3.70
   2 -32   1   12.50    4.00
  -2 -32  -1   10.60    4.10
  -2  32  -1   16.90    2.50
   2  32   1   15.20    4.40
  -2  32  -1   17.40    4.80
  -3 -32  -1    6.10    3.60
   3 -32   1   11.80    3.60
  -3  32  -1   10.50    2.20
  -3  32  -1   12.10    4.80
   3  32   1   10.80    4.10
  -4 -32  -1    7.80    3.90
   4 -32   1    2.00    3.00
  -4 -32  -1   -2.80    2.70
  -4  32  -1    3.60    4.00
  -4  32  -1    2.60    1.80
   4  32   1    1.80    3.30
   5 -32   1   19.90    4.80
  -5 -32  -1   11.80    4.20
  -5 -32  -1   17.60    5.00
   5 -32   1   23.70    4.50
   5  32   1   21.80    5.30
  -5  32  -1   23.00    3.20
  -6 -32  -1   11.40    4.90
   6 -32   1   10.20    3.60
  -6 -32  -1   10.10    4.60
   6 -32   1   18.30    4.50
   6  32   1   10.70    4.60
  -6  32  -1   20.00    3.50
   7 -32   1   31.80    5.60
  -7 -32  -1   23.70    6.20
   7  32   1   17.20    5.40
  -7  32  -1   19.10    3.60
  -8 -32  -1   -3.30    4.40
   8 -32   1    3.00    3.60
   8  32   1   11.70    5.80
  -8  32  -1    6.20    3.30
   8 -33  -1   12.90    4.50
  -8 -33   1    9.90    5.10
  -8  33   1    9.20    3.40
   8  33  -1   10.60    5.90
  -7 -33   1   -1.40    4.20
  -7 -33   1    8.80    4.90
   7 -33  -1    4.30    3.30
   7  33  -1    6.70    4.50
  -7  33   1    0.10    2.20
   6 -33  -1    4.40    3.60
   6 -33  -1   13.60    4.10
  -6 -33   1    8.40    3.80
  -6 -33   1    8.70    4.20
  -6  33   1    8.60    2.50
   6  33  -1    2.20    3.90
  -5 -33   1   26.10    5.70
   5 -33  -1   24.60    4.60
  -5 -33   1   27.70    4.80
   5  33  -1   42.60    7.30
  -5  33   1   37.60    6.50
  -5  33   1   31.60    3.60
  -4 -33   1   24.40    5.60
   4 -33  -1   29.40    5.00
  -4  33   1   21.40    2.90
  -4  33   1   21.50    5.40
   4  33  -1   20.60    5.30
  -3 -33   1   45.80    6.80
   3 -33  -1   54.19    6.30
  -3  33   1   47.00    7.00
   3  33  -1   46.10    7.00
  -3  33   1   47.20    3.50
   2 -33  -1   12.50    3.70
  -2 -33   1    2.80    4.00
  -2  33   1    6.40    4.00
  -2  33   1    8.20    2.00
   2  33  -1   -0.10    3.20
   1 -33  -1   33.10    5.30
  -1 -33   1   32.70    5.60
  -1  33   1   37.80    3.00
  -1  33   1   34.10    5.70
   1  33  -1   39.30    6.30
   0 -33  -1   39.70    5.70
   0 -33   1   40.20    5.80
   0  33  -1   41.70    6.40
   0  33   1   55.89    6.90
  -1 -33  -1    8.20    3.80
   1 -33   1    6.60    3.70
  -1  33  -1    8.50    1.90
  -1  33  -1   13.70    4.80
   1  33   1   13.60    4.30
  -2 -33  -1    3.10    3.50
   2 -33   1    0.80    2.80
  -2  33  -1    2.30    3.50
  -2  33  -1    3.20    1.80
   2  33   1   -1.10    3.50
   3 -33   1   22.00    4.40
  -3 -33  -1   24.20    5.10
   3  33   1   24.20    5.70
  -3  33  -1   25.90    3.00
  -3  33  -1   31.10    6.40
  -4 -33  -1    1.30    3.70
   4 -33   1    1.70    3.10
  -4  33  -1    5.80    4.50
  -4  33  -1   -1.20    1.80
   4  33   1   -2.10    3.20
   5 -33   1    7.50    3.60
  -5 -33  -1    4.10    3.70
  -5 -33  -1    3.50    4.00
   5 -33   1    3.20    2.80
   5  33   1    3.60    3.70
   6 -33   1   21.20    4.20
   6 -33   1   18.30    4.70
  -6 -33  -1   16.60    5.10
  -6 -33  -1   18.00    5.50
   6  33   1    9.20    4.90
  -6  33  -1   17.90    3.30
   7 -33   1    4.50    3.50
  -7 -33  -1    0.60    5.00
   7  33   1    5.90    4.60
  -7  33  -1    6.40    2.70
  -8 -33  -1    9.50    6.30
   8 -33   1   10.10    4.20
  -8 -34   1   -0.20    5.00
   8 -34  -1    5.30    3.80
  -7 -34   1   14.80    5.50
  -7 -34   1    8.20    5.00
   7 -34  -1   11.70    3.80
  -7  34   1   12.00    3.10
   7  34  -1   17.90    6.00
  -6 -34   1   -4.30    2.90
  -6 -34   1   -2.00    4.00
   6 -34  -1   -1.30    2.70
   6 -34  -1   -1.20    2.60
  -6  34   1   -0.30    1.90
   6  34  -1    5.50    4.40
  -5 -34   1   16.40    4.80
   5 -34  -1    9.20    3.80
  -5  34   1   15.50    5.70
   5  34  -1   24.00    5.90
  -5  34   1   13.80    2.70
  -4 -34   1   13.70    4.70
   4 -34  -1   18.10    4.40
  -4  34   1   16.60    2.90
   4  34  -1   16.40    5.20
  -4  34   1   15.70    4.90
  -3 -34   1    3.60    4.20
   3 -34  -1   11.10    3.60
   3  34  -1    2.70    3.60
  -3  34   1    5.50    4.00
   2 -34  -1    6.70    3.40
  -2 -34   1    6.90    4.30
   2  34  -1    6.40    4.50
  -2  34   1    6.30    1.90
  -2  34   1    8.40    4.00
   1 -34  -1   34.40    5.30
  -1 -34   1   39.00    5.80
  -1  34   1   41.30    6.30
   1  34  -1   40.00    6.50
  -1  34   1   49.10    3.40
   0 -34  -1   20.40    4.70
   0 -34   1   13.90    4.40
   0  34  -1   19.80    5.10
   0  34   1   18.20    5.10
  -1 -34  -1    7.40    3.80
   1 -34   1    4.40    3.40
   1  34   1    7.30    4.00
  -1  34  -1    8.20    4.10
   2 -34   1   -0.30    2.90
  -2 -34  -1    3.70    4.10
  -2  34  -1    2.80    3.60
   2  34   1    6.90    4.40
  -2  34  -1    3.70    1.90
  -3 -34  -1    2.40    4.00
   3 -34   1    5.60    3.40
   3  34   1   -0.20    3.40
  -3  34  -1    3.90    4.30
   4 -34   1    4.20    3.30
  -4 -34  -1    5.30    3.80
  -4  34  -1    5.10    4.40
   4  34   1    0.80    4.00
  -4  34  -1   -1.30    1.90
   5 -34   1    4.70    2.90
  -5 -34  -1    3.30    3.90
   5 -34   1   11.90    4.30
  -5 -34  -1    1.70    3.60
  -5  34  -1    9.00    3.00
   5  34   1   14.50    5.00
  -6 -34  -1    8.80    4.60
   6 -34   1   12.30    4.40
  -6 -34  -1    8.30    4.70
   6 -34   1   12.50    4.10
   6  34   1   12.40    5.50
  -6  34  -1   17.70    3.40
   7 -34   1    3.50    3.50
  -7 -34  -1    6.50    4.80
  -7  34  -1   10.30    3.10
   7  34   1    3.90    5.00
  -8 -34  -1   11.40    5.90
   8 -34   1    3.80    3.80
  -8 -35   1    8.70    5.50
   8 -35  -1   11.60    4.20
   7 -35  -1    3.60    3.70
  -7 -35   1   -1.10    4.00
  -7 -35   1   -0.80    4.40
   7  35  -1    6.30    5.00
  -7  35   1    1.80    2.50
  -6 -35   1    3.00    4.50
   6 -35  -1    3.10    3.70
  -6 -35   1    1.90    4.00
   6 -35  -1    4.70    3.70
   6  35  -1    4.10    4.20
  -6  35   1    1.90    2.20
   5 -35  -1   10.70    4.00
  -5 -35   1   18.10    5.30
   5  35  -1   21.20    5.60
  -5  35   1   14.80    2.90
  -5  35   1   25.10    6.30
  -4 -35   1   10.10    4.60
   4 -35  -1   11.50    4.00
  -4  35   1   15.00    2.70
  -4  35   1   11.20    5.10
   4  35  -1    9.50    4.40
   3 -35  -1   22.40    4.50
  -3 -35   1   30.00    5.70
  -3  35   1   27.80    3.10
   3  35  -1   24.00    5.90
  -3  35   1   18.30    5.10
  -2 -35   1   57.19    7.50
   2 -35  -1   57.39    6.60
  -2  35   1   56.49    7.70
   2  35  -1   67.29    8.10
  -2  35   1   65.29    4.20
  -1 -35   1    6.50    4.60
   1 -35  -1    4.60    3.50
  -1  35   1    5.30    3.80
   1  35  -1    8.00    4.40
   0 -35   1    8.10    4.30
   0 -35  -1    2.90    3.60
   0  35  -1   -0.30    3.50
   0  35   1    4.40    3.60
  -1 -35  -1    7.50    4.10
   1 -35   1    2.50    3.10
   1  35   1    0.60    3.80
  -1  35  -1   -1.60    3.30
  -2 -35  -1   40.30    6.10
   2 -35   1   27.50    4.90
  -2  35  -1   25.10    5.90
   2  35   1   40.60    6.80
  -2  35  -1   30.60    3.10
  -3 -35  -1    3.60    4.10
   3 -35   1    4.30    3.20
  -3  35  -1    7.90    4.70
   3  35   1    4.00    4.00
  -3  35  -1   10.40    2.30
   4 -35   1   26.10    4.80
  -4 -35  -1   28.30    5.60
  -4  35  -1   35.20    3.90
  -4  35  -1   26.90    6.30
   4  35   1   38.30    6.50
  -5 -35  -1    2.10    4.10
   5 -35   1    2.80    2.80
   5 -35   1    1.50    3.10
  -5  35  -1    2.10    4.40
  -5  35  -1    3.80    2.40
   5  35   1   -0.70    3.90
  -6 -35  -1   -2.70    3.90
   6 -35   1    2.70    3.50
   6 -35   1    6.50    3.50
  -6 -35  -1   -3.50    4.40
   6  35   1   -1.80    3.70
  -6  35  -1    1.90    2.60
  -7 -35  -1   14.30    6.10
   7 -35   1    2.10    3.90
   7  35   1   13.50    5.30
  -7  35  -1   11.10    3.50
   7 -36  -1    8.20    3.80
  -7 -36   1    2.40    5.20
  -7 -36   1    6.50    4.70
   7  36  -1    2.90    4.60
  -7  36   1    4.10    2.90
   6 -36  -1   21.80    4.60
  -6 -36   1   17.70    5.40
   6 -36  -1   27.10    5.30
  -6  36   1   22.30    3.60
   6  36  -1   20.80    6.40
  -5 -36   1   10.00    5.20
   5 -36  -1    1.90    3.10
  -5  36   1    3.80    4.30
   5  36  -1   14.30    5.30
  -5  36   1    9.10    2.60
  -4 -36   1   -1.60    3.80
   4 -36  -1    0.00    3.10
   4  36  -1   -4.90    3.20
  -4  36   1    4.80    2.20
  -4  36   1    3.70    4.50
   3 -36  -1    2.00    3.00
  -3 -36   1    7.30    4.30
  -3  36   1    4.40    4.20
   3  36  -1    7.90    4.70
  -3  36   1    0.70    2.00
  -2 -36   1   29.90    6.30
   2 -36  -1   19.40    4.50
  -2  36   1   16.00    4.90
   2  36  -1   23.80    5.60
  -2  36   1   22.20    2.90
   1 -36  -1   10.40    4.00
  -1 -36   1   18.40    4.90
   1  36  -1   12.90    5.10
  -1  36   1    1.60    4.10
   0 -36   1   12.10    4.40
   0 -36  -1   10.60    4.10
   0  36  -1   15.80    4.90
   0  36   1   16.10    5.00
  -1 -36  -1   12.90    4.40
   1 -36   1   10.00    4.40
   1  36   1    8.40    4.20
  -1  36  -1   14.10    5.10
  -2 -36  -1    9.60    4.70
   2 -36   1    4.20    3.50
   2  36   1    6.80    4.60
  -2  36  -1    7.70    2.10
  -2  36  -1    7.90    4.90
   3 -36   1   13.10    4.00
  -3 -36  -1   15.60    4.80
  -3  36  -1   12.90    2.60
  -3  36  -1   10.00    5.30
   3  36   1    8.50    4.50
  -4 -36  -1   -0.30    4.00
   4 -36   1    2.40    3.00
  -4  36  -1    2.90    2.00
  -4  36  -1   -0.80    4.00
   4  36   1    6.50    4.30
  -5 -36  -1   18.50    5.50
   5 -36   1   21.50    4.90
   5 -36   1   22.00    4.50
  -5  36  -1   23.70    6.60
  -5  36  -1   19.50    3.40
   5  36   1   18.60    5.60
  -6 -36  -1    9.50    4.70
   6 -36   1    9.30    4.60
   6 -36   1    8.70    3.60
  -6  36  -1    8.80    2.90
   6  36   1   -1.60    4.50
  -7 -36  -1    0.30    4.60
   7 -36   1    4.80    4.00
  -7  36  -1    2.00    2.70
  -7 -37   1    2.30    4.60
   7 -37  -1    9.80    4.20
   7  37  -1    2.00    4.60
   6 -37  -1    7.60    3.50
   6 -37  -1   -4.80    3.30
  -6 -37   1   -7.60    4.00
  -6  37   1   -0.40    2.20
   6  37  -1   -0.10    4.20
   5 -37  -1   47.50    6.30
  -5 -37   1   43.60    7.10
  -5  37   1   44.40    8.00
  -5  37   1   55.89    4.80
   5  37  -1   52.39    8.60
   4 -37  -1   23.10    4.80
  -4 -37   1   25.70    5.90
  -4  37   1   20.40    6.30
   4  37  -1   14.10    5.50
  -3 -37   1   24.50    5.80
   3 -37  -1   37.50    5.80
  -3  37   1   25.80    6.20
  -3  37   1   37.00    3.40
   3  37  -1   30.20    6.60
   2 -37  -1   29.90    5.30
  -2 -37   1   37.50    6.50
  -2  37   1   39.60    6.80
   2  37  -1   39.70    7.20
   1 -37  -1   10.70    4.10
  -1 -37   1   -0.70    3.60
   1  37  -1    0.80    3.80
  -1  37   1    2.30    4.10
   0 -37   1    0.50    3.50
   0 -37  -1    2.70    3.60
   0  37   1   -0.70    3.40
   0  37  -1    5.20    4.10
  -1 -37  -1    5.00    3.80
   1 -37   1   18.80    5.30
  -1  37  -1    9.60    4.90
   1  37   1    8.10    4.40
  -2 -37  -1   17.60    5.00
   2 -37   1   10.90    4.40
  -2  37  -1   17.30    5.40
   2  37   1   19.40    5.70
  -2  37  -1   15.30    2.80
  -3 -37  -1    8.30    4.40
   3 -37   1   19.50    4.50
  -3  37  -1   15.90    5.50
   3  37   1   18.40    6.00
   4 -37   1    0.70    3.20
  -4 -37  -1    3.70    4.50
  -4  37  -1    0.40    2.00
  -4  37  -1    2.40    4.60
   4  37   1   -3.70    4.10
   5 -37   1    3.70    4.00
   5 -37   1    4.30    3.20
  -5 -37  -1   -5.80    3.00
   5  37   1   -2.20    3.70
  -5  37  -1    1.50    5.20
  -6 -37  -1    2.90    4.30
   6 -37   1    1.00    3.00
   6 -37   1    1.30    3.60
   6  37   1    3.50    4.30
  -6  37  -1    1.30    2.50
  -7 -37  -1    7.30    5.90
   7 -37   1   -5.10    3.70
   7 -38  -1   22.10    5.40
  -7 -38   1   26.30    7.20
  -6 -38   1    3.60    5.10
   6 -38  -1    2.30    3.60
   6  38  -1   -3.50    4.30
  -6  38   1    5.10    2.60
   5 -38  -1    2.30    3.30
  -5 -38   1    3.90    4.60
   5  38  -1    4.50    5.10
  -5  38   1   11.10    5.70
  -4 -38   1   40.40    7.10
   4 -38  -1   27.30    5.00
   4  38  -1   31.30    6.80
  -4  38   1   40.90    3.80
  -4  38   1   27.20    6.40
  -3 -38   1   31.00    6.30
   3 -38  -1   28.40    5.10
   3  38  -1   32.70    6.70
  -3  38   1   27.00    6.00
  -2 -38   1   38.50    6.70
   2 -38  -1   36.70    6.00
   2  38  -1   31.80    6.40
  -2  38   1   26.80    6.30
   1 -38  -1   -1.80    3.30
  -1 -38   1    2.50    4.30
  -1  38   1   -1.50    4.00
   1  38  -1    1.40    4.20
   0 -38   1   11.60    4.40
   0 -38  -1   13.90    4.50
   0  38  -1   12.30    5.40
   0  38   1   18.70    5.30
   1 -38   1   15.40    4.70
  -1 -38  -1   22.00    5.10
  -1  38  -1    8.60    4.50
   1  38   1   11.50    5.00
   2 -38   1    3.10    3.80
  -2 -38  -1   11.70    4.90
  -2  38  -1    0.10    4.40
   2  38   1    7.50    4.80
   3 -38   1   16.00    4.30
  -3 -38  -1    4.70    4.40
  -3  38  -1   13.50    5.30
   3  38   1   10.80    5.10
   4 -38   1   24.90    5.00
  -4 -38  -1   22.20    5.40
  -4  38  -1   30.50    4.00
  -4  38  -1   22.80    6.60
   4  38   1   35.20    6.80
   5 -38   1    1.20    3.70
  -5 -38  -1    1.00    3.90
   5 -38   1    8.90    3.60
  -5  38  -1    6.90    5.80
   5  38   1    1.50    4.80
  -5  38  -1    3.50    2.60
   6 -38   1   18.40    5.30
   6 -38   1   17.50    4.40
  -6 -38  -1    8.00    4.70
   6  38   1   23.70    6.20
  -6  38  -1   17.60    3.60
  -6 -39   1   16.40    5.90
   6 -39  -1   23.80    5.20
  -6  39   1   16.20    3.50
   6  39  -1   23.80    6.60
  -5 -39   1   10.40    5.20
   5 -39  -1   11.60    4.10
  -5  39   1    8.60    5.90
  -5  39   1   13.10    3.10
   5  39  -1   21.30    6.80
   4 -39  -1   16.70    4.40
  -4 -39   1   14.70    6.10
  -4  39   1   19.60    3.10
  -4  39   1    0.50    4.10
   4  39  -1   19.30    6.10
   3 -39  -1   31.60    5.70
  -3 -39   1   34.50    7.00
  -3  39   1   30.60    3.50
  -3  39   1   30.50    6.90
   3  39  -1   28.00    6.50
  -2 -39   1    7.10    4.40
   2 -39  -1    3.90    3.50
  -2  39   1    9.90    5.10
   2  39  -1    5.70    4.80
  -2  39   1    6.50    2.30
   1 -39  -1   16.90    4.60
  -1 -39   1   22.00    5.40
   1  39  -1   21.10    5.90
  -1  39   1   22.30    6.00
   0 -39   1    6.40    4.20
   0 -39  -1    1.40    3.50
   0  39  -1    0.30    4.50
   0  39   1   -0.60    4.00
   1 -39   1    1.60    3.60
  -1 -39  -1    3.20    4.30
  -1  39  -1    9.30    4.70
   1  39   1    5.80    4.70
   2 -39   1   11.20    4.70
  -2 -39  -1    8.50    4.50
  -2  39  -1   18.40    5.70
   2  39   1    8.50    5.10
   3 -39   1   17.00    4.70
  -3 -39  -1   12.20    4.80
   3  39   1   24.30    6.60
  -3  39  -1   11.70    5.80
  -4 -39  -1   19.80    5.40
   4 -39   1   25.70    5.00
   4  39   1   12.70    5.50
  -4  39  -1   28.30    6.80
   5 -39   1    4.10    3.90
   5 -39   1   -0.40    3.10
  -5 -39  -1   -3.80    3.90
   5  39   1    2.40    4.40
  -5  39  -1   -5.60    4.30
   6 -39   1    5.50    4.40
   6 -39   1    1.30    3.40
  -6 -39  -1    2.20    4.60
  -6 -40   1    9.70    5.60
   6 -40  -1   16.10    4.80
  -6  40   1    7.40    3.00
  -5 -40   1    4.80    5.00
   5 -40  -1   13.20    4.70
  -5  40   1   19.90    3.50
  -5  40   1   12.60    6.20
   5  40  -1   18.40    6.20
  -4 -40   1    2.50    5.40
   4 -40  -1    9.10    4.30
  -4  40   1    1.10    4.90
   4  40  -1    7.90    5.30
  -4  40   1    7.50    2.80
   3 -40  -1   32.70    5.60
  -3 -40   1   25.70    6.80
   3  40  -1   36.30    7.20
  -3  40   1   42.90    4.30
  -3  40   1   32.10    6.70
   2 -40  -1    9.20    3.90
  -2 -40   1    8.00    5.30
   2  40  -1   11.20    5.80
  -2  40   1   12.90    5.00
  -1 -40   1   12.70    5.30
   1 -40  -1   15.20    4.70
  -1  40   1   20.40    5.60
   1  40  -1   21.60    6.20
   0 -40  -1   24.00    5.20
   0 -40   1   10.90    5.10
   0  40  -1   16.60    5.70
   0  40   1   12.50    5.10
   1 -40   1    8.30    4.30
  -1 -40  -1    4.50    4.10
   1  40   1   11.00    5.10
  -1  40  -1    8.10    5.00
  -2 -40  -1   41.20    6.90
   2 -40   1   36.30    6.10
  -2  40  -1   31.60    6.70
   2  40   1   30.60    6.70
   3 -40   1    4.70    3.60
  -3 -40  -1   -3.60    4.10
   3  40   1   -2.80    3.90
  -3  40  -1   -1.70    4.10
  -4 -40  -1    1.60    4.20
   4 -40   1    3.70    3.70
   4  40   1    2.30    4.40
  -4  40  -1   -1.70    4.20
   5 -40   1   16.00    4.70
  -5 -40  -1   20.50    5.70
   5 -40   1   30.30    5.80
  -5  40  -1   18.00    6.60
   5  40   1   30.20    6.80
  -5  40  -1   14.20    3.60
   6 -40   1   15.00    5.00
   6 -40   1   12.60    4.30
  -6 -40  -1    8.10    5.10
  -5 -41   1    3.60    5.90
   5 -41  -1    5.30    4.10
   5  41  -1   21.60    6.30
  -5  41   1    1.20    5.30
  -4 -41   1   10.40    6.00
   4 -41  -1    3.80    3.50
   4  41  -1    7.60    5.10
  -4  41   1    8.50    2.70
  -4  41   1   11.20    6.00
  -3 -41   1   12.70    6.00
   3 -41  -1   11.20    4.50
  -3  41   1   13.90    5.90
  -3  41   1   13.40    2.90
   3  41  -1    9.10    5.70
   2 -41  -1    6.10    4.10
  -2 -41   1    4.60    4.50
  -2  41   1   -0.80    4.00
   2  41  -1   -1.30    4.10
  -1 -41   1   -1.10    4.10
   1 -41  -1    5.80    4.00
   1  41  -1   10.20    5.70
  -1  41   1    9.00    4.80
   0 -41   1   18.20    5.20
   0 -41  -1   12.90    4.50
   0  41   1   14.20    5.70
   0  41  -1    6.80    5.00
  -1 -41  -1    3.30    3.90
   1 -41   1    4.90    4.10
  -1  41  -1    2.10    4.30
   1  41   1    3.80    4.40
  -2 -41  -1    9.90    4.80
   2 -41   1    9.60    4.10
   2  41   1   16.70    5.60
  -2  41  -1    9.40    5.60
   3 -41   1   10.90    4.00
  -3 -41  -1    0.00    3.90
  -3  41  -1   13.80    3.00
  -3  41  -1   10.30    5.30
   3  41   1    8.70    5.20
   4 -41   1    3.90    3.70
  -4 -41  -1    3.90    4.90
  -4  41  -1    1.10    4.80
   4  41   1    7.10    5.60
   5 -41   1   15.60    4.90
   5 -41   1   13.40    4.40
  -5 -41  -1   10.20    5.50
  -5  41  -1   15.20    6.40
   5  41   1   12.10    5.60
  -5 -42   1    7.20    5.90
   5 -42  -1   10.00    4.40
  -5  42   1   15.20    6.70
   4 -42  -1   20.00    5.00
  -4 -42   1   20.60    6.70
   4  42  -1   17.50    6.20
  -4  42   1   17.50    5.90
  -3 -42   1   17.50    5.80
   3 -42  -1    7.50    4.10
   3  42  -1   18.30    6.60
  -3  42   1    7.10    5.40
   2 -42  -1    2.70    3.50
  -2 -42   1    0.70    4.30
  -2  42   1    6.60    4.90
   2  42  -1   -3.40    4.20
  -1 -42   1    7.00    4.50
   1 -42  -1   11.30    4.40
   1  42  -1    3.60    4.60
  -1  42   1    6.20    4.60
   0 -42  -1   -0.10    4.00
   0 -42   1   -4.90    3.60
   0  42   1    0.30    4.40
   0  42  -1   -1.80    3.90
   1 -42   1   13.80    4.60
  -1 -42  -1    8.00    5.00
  -1  42  -1   10.10    5.40
   1  42   1   12.30    5.80
  -2 -42  -1   10.80    4.80
   2 -42   1    9.60    4.20
  -2  42  -1    5.20    4.70
   2  42   1    5.00    4.60
   3 -42   1   20.00    4.90
  -3 -42  -1   12.80    5.20
   3  42   1   17.10    6.20
  -3  42  -1    6.20    5.90
  -4 -42  -1    4.60    5.20
   4 -42   1    1.10    3.20
   4  42   1    3.10    5.50
  -4  42  -1    7.20    6.00
   5 -42   1    8.10    4.70
  -5 -42  -1   10.00    5.70
   5 -42   1    5.70    3.80
  -5  42  -1    5.20    5.50
  -5  43   1   14.60    6.20
   4 -43  -1    3.50    4.30
  -4 -43   1   10.40    6.20
   4  43  -1    7.90    5.40
  -4  43   1   11.00    3.10
  -4  43   1   11.90    6.20
  -3 -43   1   -0.80    4.60
   3 -43  -1    5.60    4.20
  -3  43   1    3.90    4.80
   3  43  -1    0.60    4.90
   2 -43  -1    5.30    3.80
  -2 -43   1   -0.20    4.50
  -2  43   1   -0.50    4.50
   2  43  -1   -0.10    4.60
   1 -43  -1    0.90    3.70
  -1 -43   1    4.20    4.50
  -1  43   1    4.60    4.60
   1  43  -1   10.60    6.00
   0 -43  -1    5.80    4.60
   0 -43   1   11.10    5.20
   0  43   1    1.80    4.70
   0  43  -1   -0.10    4.40
   1 -43   1    1.60    4.20
  -1 -43  -1    2.90    4.00
   1  43   1    6.70    5.20
  -1  43  -1    0.80    4.60
  -2 -43  -1    3.10    4.30
   2 -43   1   -2.40    3.30
   2  43   1    4.50    4.80
  -2  43  -1    1.10    4.60
  -3 -43  -1    6.60    5.00
   3 -43   1    0.80    3.70
  -3  43  -1   -3.00    4.60
   3  43   1   11.60    5.60
   4 -43   1    9.10    4.60
  -4 -43  -1    5.50    4.80
  -4  43  -1    8.10    6.10
  -4  44   1    0.50    4.70
  -3 -44   1   14.40    5.70
   3 -44  -1    2.10    3.90
  -3  44   1   12.30    6.50
   3  44  -1   14.50    6.20
   2 -44  -1    1.20    3.50
  -2 -44   1    0.60    5.50
  -2  44   1    5.70    4.90
   2  44  -1   -1.00    4.80
   1 -44  -1    2.60    4.00
  -1 -44   1    9.20    5.00
   1  44  -1    0.60    4.80
  -1  44   1    0.80    4.90
   0 -44   1    8.00    4.80
   0 -44  -1   12.20    4.60
   0  44  -1   16.30    6.50
   0  44   1    7.30    5.70
   1 -44   1    1.50    3.80
  -1 -44  -1    6.80    4.60
   1  44   1    4.40    5.00
  -1  44  -1    6.10    5.30
  -2 -44  -1   14.80    5.50
   2 -44   1   20.30    5.30
   2  44   1   11.80    5.50
  -2  44  -1   14.50    6.70
   3 -44   1    8.30    4.50
  -3 -44  -1    8.70    5.10
  -3  44  -1   12.70    6.50
   3  44   1   10.10    5.70
  -4 -44  -1    0.40    5.20
  -4  44  -1    4.60    2.60
  -4  44  -1  -10.40    3.80
  -3  45   1   -2.80    4.80
  -2 -45   1   -2.20    4.40
   2 -45  -1    8.70    4.30
   2  45  -1    5.70    5.80
  -2  45   1   -1.20    4.50
  -1 -45   1   11.10    5.60
   1 -45  -1    6.70    4.50
  -1  45   1    6.70    5.60
   1  45  -1    0.60    4.80
   0 -45  -1    1.90    4.30
   0 -45   1    6.00    4.60
   0  45  -1   11.90    6.10
   0  45   1    4.80    5.00
   1 -45   1    4.80    4.20
  -1 -45  -1    4.10    4.60
   1  45   1   -1.50    5.00
  -1  45  -1    1.70    4.90
   2 -45   1   14.90    4.90
  -2 -45  -1   11.90    5.80
  -2  45  -1    7.90    6.20
   2  45   1    3.50    5.70
  -3 -45  -1    2.80    4.90
  -3  45  -1   -0.20    5.00
  -2  46   1    4.30    5.40
  -1  46   1   -7.10    3.90
   0  46   1   -4.90    4.70
   0  46  -1   -7.30    3.90
  -1  46  -1   10.90    6.00
   1  46   1    7.60    5.40
  -1  47   1    8.10    5.30
 -11   0   2   15.40    4.40
  10   0  -2   22.70    4.00
 -10   0   2   18.20    4.00
   9   0  -2    9.90    2.80
  -9   0   2    6.80    2.60
   9   0  -2    4.00    2.50
   8   0  -2    3.80    2.50
  -8   0   2    3.50    2.00
   8   0  -2    4.70    2.30
  -7   0   2    6.70    1.30
   7   0  -2    2.20    2.00
   7   0  -2    4.50    1.90
  -7   0   2    9.10    2.10
  -6   0   2    0.00    1.10
   6   0  -2    0.30    1.60
  -6   0   2   -0.70    0.70
   6   0  -2    0.70    1.30
   5   0  -2  267.67    8.60
  -5   0   2  264.67    8.40
   5   0  -2  275.87    9.30
  -5   0   2  276.67    7.60
  -4   0   2   10.40    1.40
  -4   0   2   12.30    1.10
   4   0  -2   15.40    1.60
   4   0  -2    7.50    1.50
  -3   0   2  611.34   16.30
   3   0  -2  619.24   16.00
  -3   0   2  615.94   15.70
   3   0  -2  617.74   16.70
  -2   0   2   30.70    1.90
   2   0  -2   30.20    1.40
  -2   0   2   29.50    1.50
   2   0  -2   29.10    1.90
  -1   0   2   32.50    1.60
   1   0  -2   29.80    2.10
   1   0  -2   29.70    1.60
   0   0   2  741.43   18.80
   0   0  -2  760.42   18.90
   0   0   2  732.53   18.40
   0   0  -2  741.53   18.40
   0   0  -2  729.63   19.40
  -1   0  -2  372.56   10.90
  -1   0  -2  384.16   10.20
   1   0   2  373.86   10.10
  -2   0  -2 3038.30   75.59
  -2   0  -2 3018.00   74.49
   2   0   2 3055.39   74.79
   3   0   2  222.48    6.00
  -3   0  -2  217.78    6.60
  -3   0  -2  213.58    7.70
   3   0   2  213.58    7.00
   4   0   2  116.29    5.00
   4   0   2  119.69    4.10
  -4   0  -2  119.79    5.80
  -4   0  -2  120.69    4.40
  -5   0  -2  293.87    9.10
   5   0   2  294.37    8.70
   5   0   2  298.97   10.00
  -5   0  -2  289.37   10.60
   6   0   2   19.30    2.80
  -6   0  -2   20.00    3.40
  -6   0  -2   27.20    2.70
   7   0   2   52.09    4.50
  -7   0  -2   53.69    3.50
  -7   0  -2   51.19    5.60
   8   0   2   48.10    4.80
  -8   0  -2   33.00    5.20
  -8   0  -2   44.70    3.80
  -9   0  -2    7.80    4.10
   9   0   2   10.80    3.50
  10   0   2   14.30    4.40
 -10   0  -2   11.60    4.90
 -11   0  -2   10.90    5.00
  11   0   2    1.20    3.60
 -11  -1   2   -9.80    2.70
 -11   1   2    2.50    3.20
 -10  -1   2   10.80    3.30
 -10   1   2    8.60    3.40
  10   1  -2   14.30    3.50
  -9  -1   2   23.90    3.70
   9  -1  -2   27.90    4.00
   9  -1  -2   24.60    3.90
   9   1  -2   29.80    4.10
   9   1  -2   20.60    3.70
  -9   1   2   37.30    4.10
   8  -1  -2   46.90    4.40
  -8  -1   2   44.00    4.00
   8  -1  -2   43.00    4.20
   8   1  -2   51.89    4.40
  -8   1   2   42.20    3.80
   8   1  -2   36.00    4.40
  -7  -1   2   11.30    1.50
   7  -1  -2    9.80    2.00
  -7  -1   2   10.90    2.00
   7  -1  -2   11.70    2.40
   7   1  -2    8.50    2.40
  -7   1   2   12.60    2.20
   7   1  -2    8.20    2.10
  -7   1   2   13.00    1.60
   6  -1  -2   10.30    2.10
  -6  -1   2    7.80    1.70
  -6  -1   2    9.00    1.20
   6  -1  -2   10.00    1.90
   6   1  -2    7.20    1.60
  -6   1   2   12.80    2.00
  -6   1   2    7.70    1.20
   6   1  -2    9.00    2.00
   5  -1  -2  433.56   12.60
  -5  -1   2  448.36   11.60
  -5  -1   2  439.56   12.60
   5  -1  -2  428.66   13.20
   5   1  -2  438.56   13.30
  -5   1   2  431.86   11.60
  -5   1   2  445.46   12.50
   5   1  -2  423.36   12.60
   4  -1  -2  102.69    4.00
  -4  -1   2  112.89    4.10
   4  -1  -2  117.99    4.70
  -4  -1   2  103.89    3.40
   4   1  -2  108.79    4.10
   4   1  -2   98.89    4.50
  -4   1   2  108.59    4.10
  -4   1   2  109.69    3.50
  -3  -1   2   63.69    2.80
   3  -1  -2   65.79    3.10
  -3  -1   2   66.59    2.30
   3  -1  -2   61.59    2.50
   3   1  -2   55.29    3.00
  -3   1   2   61.29    2.20
  -3   1   2   61.99    2.70
   3   1  -2   57.69    2.50
   2  -1  -2 2773.82   67.59
   2  -1  -2 2731.43   66.79
  -2  -1   2 2790.12   66.99
  -2  -1   2 2678.43   67.59
   2   1  -2 2816.42   65.99
  -2   1   2 2528.35   66.39
  -2   1   2 2689.73   65.99
   2   1  -2 2765.62   66.69
   1  -1  -2 1701.23   41.80
  -1  -1   2 1713.63   41.70
   1  -1  -2 1660.43   42.30
  -1   1   2 1720.73   42.00
   1   1  -2 1706.93   42.10
   1   1  -2 1679.43   42.50
   0  -1  -2 1301.07   33.20
   0  -1  -2 1293.77   32.20
   0  -1   2 1338.17   32.30
   0   1  -2 1346.07   32.70
   0   1  -2 1267.57   33.10
   0   1   2 1302.57   32.70
   0   1  -2 1361.06   32.40
   0   1   2 1289.57   32.20
  -1  -1  -2  608.64   15.70
  -1  -1  -2  605.44   16.50
   1  -1   2  598.04   15.60
  -1   1  -2  599.44   15.50
   1   1   2  593.94   15.40
  -1   1  -2  597.64   16.30
  -2  -1  -2  429.36   11.60
   2  -1   2  432.36   11.80
  -2  -1  -2  427.96   12.70
   2   1   2  428.36   11.70
  -2   1  -2  415.66   11.40
  -2   1  -2  425.66   12.40
   3  -1   2   94.39    2.90
  -3  -1  -2   87.19    3.40
   3  -1   2   88.39    3.80
  -3  -1  -2   87.39    4.50
  -3   1  -2   88.59    3.40
   3   1   2   92.69    3.00
   3   1   2   90.69    3.80
  -3   1  -2   85.89    4.40
  -4  -1  -2  464.95   14.80
   4  -1   2  491.45   14.10
  -4  -1  -2  472.65   13.40
   4  -1   2  504.35   12.90
  -4   1  -2  475.45   14.80
   4   1   2  492.35   12.90
  -4   1  -2  473.25   13.30
   4   1   2  488.75   14.10
   5  -1   2   92.79    3.70
  -5  -1  -2   89.59    5.20
  -5  -1  -2  101.09    4.10
   5  -1   2   84.19    4.50
   5   1   2   94.69    3.80
   5   1   2   89.79    4.60
  -5   1  -2   89.59    5.20
  -5   1  -2   84.89    3.90
  -6  -1  -2   28.90    2.70
  -6  -1  -2   24.80    3.90
   6  -1   2   30.50    3.20
   6   1   2   39.50    3.70
  -6   1  -2   36.20    2.60
  -6   1  -2   27.30    3.90
  -7  -1  -2   89.29    4.70
   7  -1   2   99.79    5.80
  -7  -1  -2   89.99    6.70
   7   1   2   97.89    5.80
  -7   1  -2   92.29    4.80
  -7   1  -2   82.29    6.50
  -8  -1  -2   82.69    6.80
   8  -1   2  105.09    6.70
  -8  -1  -2   94.09    5.20
  -8   1  -2   91.79    7.20
  -8   1  -2   97.29    5.40
   8   1   2  108.59    6.60
  -9  -1  -2  145.89    9.50
   9  -1   2  179.48    9.20
   9   1   2  160.28    8.90
  -9   1  -2  139.49    9.40
 -10  -1  -2    2.70    4.10
  10  -1   2    0.00    3.20
 -10   1  -2    2.50    3.60
  10   1   2   -6.50    2.40
 -11  -1  -2    3.80    4.80
  11  -1   2    7.30    3.90
  11   1   2   -5.40    3.40
 -11  -2   2    7.20    4.00
 -11   2   2   11.80    4.20
 -10  -2   2   36.40    4.70
 -10   2   2   30.70    4.40
  10   2  -2   34.60    4.90
  -9  -2   2    8.60    2.90
   9  -2  -2    4.40    2.60
   9  -2  -2    5.70    2.80
   9   2  -2    2.80    2.20
  -9   2   2    4.40    2.20
   9   2  -2    3.20    2.70
  -8  -2   2    9.00    2.50
   8  -2  -2    5.70    2.30
   8  -2  -2    8.80    2.80
   8   2  -2    7.70    2.50
   8   2  -2    3.60    2.50
  -8   2   2    8.70    2.30
  -8   2   2   12.40    1.80
   7  -2  -2   47.20    3.90
  -7  -2   2   47.60    3.40
   7  -2  -2   43.50    3.60
  -7  -2   2   48.70    2.60
   7   2  -2   46.60    4.40
  -7   2   2   45.30    2.60
  -7   2   2   46.30    3.40
   7   2  -2   40.50    3.50
   6  -2  -2  126.59    5.40
   6  -2  -2  122.09    5.90
  -6  -2   2  126.39    5.30
  -6  -2   2  125.79    4.20
  -6   2   2  125.39    4.30
   6   2  -2  127.19    6.10
  -6   2   2  117.49    4.90
   6   2  -2  117.19    5.40
   5  -2  -2    5.10    1.20
  -5  -2   2    5.80    0.90
  -5  -2   2    8.10    1.50
   5  -2  -2    4.90    1.50
   5   2  -2    5.10    1.80
  -5   2   2    8.10    1.40
  -5   2   2    5.60    1.00
   5   2  -2    4.10    1.40
   4  -2  -2  104.69    4.60
  -4  -2   2  114.59    3.50
  -4  -2   2  113.99    4.30
   4  -2  -2  114.29    4.20
   4   2  -2  108.89    4.20
  -4   2   2  107.69    3.60
   4   2  -2  115.49    4.90
  -4   2   2  106.79    4.00
   3  -2  -2  163.38    5.00
  -3  -2   2  172.38    5.40
   3  -2  -2  165.18    5.70
  -3  -2   2  166.28    4.70
   3   2  -2  173.68    5.30
  -3   2   2  164.28    5.30
  -3   2   2  165.98    4.90
   3   2  -2  168.68    5.90
   2  -2  -2   82.69    2.50
   2  -2  -2   75.99    3.20
  -2  -2   2   83.59    2.70
  -2  -2   2   79.49    3.20
   2  -2  -2   91.09    3.50
  -2   2   2   74.79    3.10
  -2   2   2   80.99    2.80
   2   2  -2   82.19    2.90
   2   2  -2   81.39    3.50
   1  -2  -2  882.41   23.00
  -1  -2   2  884.41   22.30
   1  -2  -2  910.21   22.60
   1   2  -2  905.71   23.60
   1   2  -2  936.91   23.10
   1   2  -2  921.71   23.40
  -1   2   2  916.01   23.10
   0  -2  -2   83.89    3.50
   0  -2  -2   82.79    2.60
   0   2  -2   88.99    3.10
   0   2   2   83.49    2.60
   0   2  -2   93.39    3.00
   0   2  -2   87.09    3.40
   0   2   2   90.19    3.10
   0   2  -2   84.69    3.40
  -1  -2  -2  124.69    4.90
   1  -2   2  118.99    4.00
  -1  -2  -2  124.69    4.10
  -1   2  -2  128.99    4.10
  -1   2  -2  123.79    4.70
   2  -2   2  209.78    6.50
  -2  -2  -2  210.18    6.20
  -2  -2  -2  202.88    7.30
   2  -2   2  208.48    5.40
  -2   2  -2  205.08    6.10
  -2   2  -2  201.28    6.90
  -3  -2  -2  395.16   12.40
   3  -2   2  405.36   10.40
   3  -2   2  406.86   11.60
  -3  -2  -2  388.56   11.00
   3   2   2  379.16   11.30
  -3   2  -2  384.96   12.10
  -3   2  -2  396.46   10.90
   3   2   2  406.66   10.40
   4  -2   2  220.28    6.40
  -4  -2  -2  212.08    6.90
  -4  -2  -2  220.58    8.40
   4  -2   2  212.18    7.50
  -4   2  -2  215.38    6.90
   4   2   2  223.08    6.60
   4   2   2  219.08    7.60
  -4   2  -2  203.48    8.00
   5  -2   2   17.60    2.40
   5  -2   2   18.50    1.70
  -5  -2  -2   20.10    3.10
  -5  -2  -2   21.10    2.10
   5   2   2   17.20    1.90
  -5   2  -2   19.60    3.00
  -5   2  -2   19.80    1.90
   5   2   2   17.30    2.50
  -6  -2  -2   40.20    4.40
   6  -2   2   31.20    3.40
  -6  -2  -2   27.40    2.50
  -6   2  -2   30.00    2.70
  -6   2  -2   30.60    4.00
   6   2   2   33.60    3.30
  -7  -2  -2   11.80    3.40
   7  -2   2   19.70    3.20
  -7  -2  -2   11.30    2.20
  -7   2  -2   11.10    3.40
   7   2   2   16.70    3.20
  -7   2  -2   17.40    2.60
  -8  -2  -2    4.50    3.20
   8  -2   2    5.50    2.60
  -8   2  -2    7.90    2.30
   8   2   2    3.80    2.90
  -8   2  -2    4.10    3.40
  -9  -2  -2    5.30    3.70
   9  -2   2    9.00    3.30
  -9   2  -2    0.00    3.40
   9   2   2    2.90    3.10
  10  -2   2   11.00    3.70
 -10  -2  -2   10.60    4.30
  10   2   2    3.40    3.50
 -10   2  -2    0.90    3.40
  11  -2   2   15.20    4.60
 -11  -2  -2   11.90    5.10
  11   2   2    8.00    4.20
 -11  -3   2   15.90    4.30
 -10  -3   2   30.30    4.50
  10   3  -2   18.70    4.10
 -10   3   2   43.00    5.00
   9  -3  -2   39.50    4.70
  -9  -3   2   44.10    4.60
   9  -3  -2   41.40    4.60
   9   3  -2   42.90    5.00
  -9   3   2   37.30    4.10
   9   3  -2   59.29    5.20
   8  -3  -2   22.30    3.50
   8  -3  -2   21.50    3.20
  -8  -3   2   27.10    3.40
  -8   3   2   21.40    2.90
   8   3  -2   24.10    3.80
  -8   3   2   28.30    2.50
   8   3  -2   28.10    3.70
  -7  -3   2    8.40    2.00
   7  -3  -2    8.00    2.00
   7  -3  -2    6.70    2.10
  -7   3   2    7.30    1.50
  -7   3   2   11.90    2.10
   7   3  -2   12.90    2.80
   7   3  -2    8.30    2.30
   6  -3  -2   54.59    3.80
  -6  -3   2   57.09    3.40
  -6  -3   2   59.99    2.50
   6  -3  -2   62.19    3.60
  -6   3   2   59.49    3.20
   6   3  -2   66.29    4.50
   6   3  -2   55.39    3.70
  -6   3   2   54.69    2.70
  -5  -3   2  232.38    6.60
  -5  -3   2  246.38    7.80
   5  -3  -2  233.98    8.30
   5  -3  -2  232.38    7.60
  -5   3   2  224.38    6.80
  -5   3   2  231.38    7.40
   5   3  -2  237.08    8.50
   5   3  -2  230.98    7.80
  -4  -3   2  160.18    4.50
  -4  -3   2  155.18    5.40
   4  -3  -2  155.18    5.20
   4  -3  -2  157.68    5.90
   4   3  -2  150.58    5.50
  -4   3   2  157.98    4.80
  -4   3   2  163.18    5.20
   4   3  -2  146.29    5.90
  -3  -3   2   28.20    1.80
   3  -3  -2   33.30    2.20
   3  -3  -2   31.20    1.60
  -3  -3   2   32.30    1.30
   3   3  -2   30.00    2.20
   3   3  -2   29.00    1.90
  -3   3   2   32.10    1.60
  -3   3   2   29.00    1.80
   2  -3  -2 1129.49   29.60
  -2  -3   2 1194.98   29.00
   2  -3  -2 1234.28   29.90
  -2  -3   2 1131.89   29.60
   2  -3  -2 1161.98   28.80
   2   3  -2 1193.18   29.50
   2   3  -2 1189.98   30.00
  -2   3   2 1138.39   29.20
  -1  -3   2 1329.67   32.20
   1  -3  -2 1308.07   32.40
   1  -3  -2 1262.87   32.80
   1   3  -2 1328.27   33.70
   1   3  -2 1349.07   33.50
  -1   3   2 1316.17   33.20
   1   3  -2 1352.26   33.30
   0  -3  -2  433.66   11.20
   0  -3  -2  436.16   12.20
   0   3  -2  447.36   12.00
   0   3   2  443.56   11.70
   0   3  -2  442.06   11.50
   0   3  -2  421.26   12.00
   0   3   2  440.76   11.20
   0   3  -2  446.96   11.60
  -1  -3  -2  257.37    6.90
   1  -3   2  272.87    7.10
  -1  -3  -2  260.47    8.40
   1  -3   2  248.98    7.50
  -1  -3  -2  270.47    7.60
  -1   3  -2  267.97    7.40
   1   3   2  261.37    7.30
  -1   3  -2  254.57    8.00
   2  -3   2   84.09    2.70
   2  -3   2   86.39    3.50
  -2  -3  -2   86.19    4.20
  -2  -3  -2   88.99    2.80
  -2  -3  -2   94.49    3.40
  -2   3  -2   91.49    3.30
  -2   3  -2   84.89    4.00
   2   3   2   90.49    3.50
   3  -3   2  153.68    5.60
  -3  -3  -2  161.08    6.40
  -3  -3  -2  149.99    5.10
   3  -3   2  153.28    4.50
  -3   3  -2  148.89    4.90
  -3   3  -2  142.39    5.80
   3   3   2  149.49    4.60
   3   3   2  149.79    5.50
  -4  -3  -2  243.28    7.50
   4  -3   2  232.98    8.10
   4  -3   2  247.98    7.00
  -4  -3  -2  241.38    9.00
   4   3   2  250.47    8.50
  -4   3  -2  242.18    8.90
   4   3   2  255.97    7.50
  -4   3  -2  245.68    7.70
   5  -3   2   69.49    3.10
   5  -3   2   72.79    4.10
  -5  -3  -2   73.09    4.80
  -5  -3  -2   70.89    3.40
   5   3   2   73.49    3.50
   5   3   2   71.09    4.10
  -5   3  -2   70.39    3.50
  -5   3  -2   67.19    4.50
  -6  -3  -2   17.20    3.30
   6  -3   2   15.20    2.60
  -6  -3  -2   17.50    2.20
   6   3   2   16.40    2.70
  -6   3  -2   14.30    2.10
  -6   3  -2   16.90    3.10
   7  -3   2   99.29    5.80
  -7  -3  -2   90.99    6.50
  -7  -3  -2  104.69    5.00
  -7   3  -2   98.59    4.80
   7   3   2  103.79    6.30
  -7   3  -2   93.79    6.70
   8  -3   2  161.38    8.10
  -8  -3  -2  153.78    9.30
   8   3   2  161.88    8.20
  -8   3  -2  134.09    8.50
  -8   3  -2  159.98    6.80
  -9  -3  -2   49.50    6.50
   9  -3   2   57.59    5.80
  -9   3  -2   44.60    4.20
  -9   3  -2   41.10    6.10
   9   3   2   44.00    5.60
 -10  -3  -2   -0.90    4.00
  10  -3   2    4.20    3.10
 -10   3  -2    7.80    4.10
  10   3   2    5.60    3.80
 -11  -3  -2   -0.40    4.70
  11  -3   2    3.60    3.50
  11   3   2    1.30    3.90
 -11  -4   2   -4.10    2.90
 -10  -4   2   34.90    4.90
 -10   4   2   27.50    4.10
  10   4  -2   33.30    5.00
  -9  -4   2   40.00    4.50
   9  -4  -2   33.20    4.30
   9  -4  -2   34.10    4.50
   9   4  -2   28.80    4.40
   9   4  -2   40.60    4.70
  -9   4   2   33.90    3.70
   8  -4  -2   21.10    3.20
   8  -4  -2   29.90    3.60
  -8  -4   2   26.50    3.30
  -8   4   2   27.50    2.40
   8   4  -2   21.30    3.40
   8   4  -2   25.80    3.80
  -8   4   2   25.10    3.10
   7  -4  -2   19.10    2.60
  -7  -4   2   20.60    2.60
   7  -4  -2   19.40    3.10
   7   4  -2   22.60    3.50
  -7   4   2   19.60    2.40
  -7   4   2   22.10    1.90
   7   4  -2   19.30    2.70
   6  -4  -2   31.70    2.70
   6  -4  -2   34.00    3.30
  -6  -4   2   36.80    2.80
  -6  -4   2   34.10    1.80
  -6   4   2   31.90    2.40
   6   4  -2   30.20    3.20
  -6   4   2   30.60    2.00
   6   4  -2   30.90    2.80
  -5  -4   2   91.99    3.00
  -5  -4   2   88.89    4.00
   5  -4  -2   84.29    3.90
   5  -4  -2   88.19    4.50
  -5   4   2   91.49    3.40
  -5   4   2   90.79    3.80
   5   4  -2   87.49    4.20
   5   4  -2   78.99    4.70
  -4  -4   2  271.57    7.20
  -4  -4   2  262.87    8.20
   4  -4  -2  275.47    8.10
   4  -4  -2  277.57    8.80
  -4   4   2  274.47    7.80
   4   4  -2  281.57    9.20
  -4   4   2  271.47    8.10
   4   4  -2  274.57    8.60
   3  -4  -2  191.28    5.60
  -3  -4   2  196.58    6.10
  -3  -4   2  195.08    5.20
   3  -4  -2  188.78    6.40
  -3   4   2  198.68    5.80
   3   4  -2  199.98    6.80
  -3   4   2  195.28    6.10
   3   4  -2  202.78    6.30
   2  -4  -2  611.34   16.10
  -2  -4   2  608.54   15.20
  -2  -4   2  576.14   15.80
   2  -4  -2  605.44   15.20
   2  -4  -2  609.54   16.10
   2   4  -2  600.94   16.20
  -2   4   2  593.04   15.40
   2   4  -2  598.84   15.80
   1  -4  -2 1371.36   35.60
   1  -4  -2 1430.56   35.30
  -1  -4   2 1435.66   34.90
   1   4  -2 1474.15   37.20
  -1   4   2 1520.35   37.00
   1   4  -2 1481.45   37.40
   1   4  -2 1474.25   37.40
   0  -4  -2  469.55   12.20
   0  -4  -2  468.75   13.00
   0   4   2  474.95   12.50
   0   4  -2  468.55   12.70
   0   4   2  474.85   12.20
   0   4  -2  457.15   12.80
   0   4  -2  491.35   12.40
   0   4  -2  480.45   13.00
  -1  -4  -2 2371.66   59.89
   1  -4   2 2400.96   58.69
   1  -4   2 2379.66   59.09
  -1  -4  -2 2418.46   58.49
  -1   4  -2 2353.26   58.49
   1   4   2 2337.27   57.99
   1   4   2 2342.07   57.99
  -1   4  -2 2397.06   57.89
  -2  -4  -2  231.28    8.00
  -2  -4  -2  232.28    6.90
   2  -4   2  227.38    7.20
  -2  -4  -2  241.18    6.50
   2  -4   2  230.08    6.30
  -2   4  -2  231.28    6.80
   2   4   2  232.08    7.10
  -2   4  -2  234.68    7.60
   3  -4   2   57.79    2.20
   3  -4   2   59.99    3.10
  -3  -4  -2   53.19    3.60
  -3  -4  -2   52.69    2.60
   3   4   2   53.49    2.50
  -3   4  -2   52.49    3.40
  -3   4  -2   51.49    2.50
   3   4   2   53.19    2.90
  -4  -4  -2  113.39    4.30
   4  -4   2  115.09    3.90
   4  -4   2  110.59    4.90
  -4  -4  -2  102.39    5.40
   4   4   2  110.19    4.20
   4   4   2  116.29    5.00
  -4   4  -2  115.09    4.30
  -4   4  -2  101.49    5.30
   5  -4   2  140.89    6.00
   5  -4   2  141.49    4.90
  -5  -4  -2  135.09    6.80
  -5  -4  -2  137.49    5.20
  -5   4  -2  132.19    6.50
  -5   4  -2  135.69    5.30
   5   4   2  143.99    6.10
   5   4   2  141.39    5.20
  -6  -4  -2    2.80    2.60
   6  -4   2    0.40    1.60
  -6  -4  -2    5.00    1.50
   6   4   2    3.70    1.90
  -6   4  -2    2.30    2.40
  -6   4  -2    3.30    1.40
   7  -4   2   87.29    5.40
  -7  -4  -2   71.29    6.00
  -7  -4  -2   77.49    4.40
  -7   4  -2   76.99    4.50
   7   4   2   85.19    5.60
  -7   4  -2   78.39    5.80
   8  -4   2   48.50    5.00
  -8  -4  -2   40.80    5.60
   8   4   2   46.60    5.10
  -8   4  -2   42.60    5.30
  -8   4  -2   50.59    4.00
  -9  -4  -2    1.20    3.50
   9  -4   2    6.00    2.90
  -9   4  -2    4.60    3.70
  -9   4  -2    4.40    2.40
   9   4   2    3.30    2.90
  10  -4   2   33.80    5.30
 -10  -4  -2   35.00    6.20
  10   4   2   47.60    6.20
 -11  -4  -2   -0.10    4.20
  11  -4   2   -5.70    3.20
  11   4   2    0.20    3.30
 -11  -5   2    4.50    3.60
 -10  -5   2   83.59    6.40
  10   5  -2   91.09    7.10
 -10   5   2   82.19    6.30
   9  -5  -2   47.30    4.70
   9  -5  -2   38.20    4.60
  -9  -5   2   43.60    4.30
   9   5  -2   36.20    4.90
  -9   5   2   40.00    3.40
  -9   5   2   38.80    4.10
   9   5  -2   48.30    5.20
   8  -5  -2    3.20    2.10
  -8  -5   2    5.60    2.20
   8  -5  -2    3.00    2.20
  -8   5   2    6.50    2.20
  -8   5   2    7.30    1.70
   8   5  -2    2.70    2.20
   8   5  -2   14.00    3.30
   7  -5  -2    5.50    2.00
  -7  -5   2   10.50    2.10
   7  -5  -2   10.30    2.20
  -7   5   2    9.30    1.90
   7   5  -2    8.70    2.30
   7   5  -2    9.80    2.80
  -7   5   2   10.00    1.70
  -6  -5   2   18.60    1.40
   6  -5  -2   17.70    2.60
   6  -5  -2   21.10    2.30
  -6  -5   2   21.10    2.50
  -6   5   2   16.20    2.00
  -6   5   2   15.60    1.60
   6   5  -2   20.80    3.00
   6   5  -2   15.90    2.30
   5  -5  -2    6.30    1.40
   5  -5  -2    6.00    1.60
  -5  -5   2    4.90    0.70
  -5  -5   2    5.30    1.30
  -5   5   2    4.80    1.00
   5   5  -2    2.60    1.30
   5   5  -2    2.50    1.60
  -5   5   2    5.80    1.20
   4  -5  -2    8.10    1.30
  -4  -5   2    7.90    0.70
   4  -5  -2    5.30    1.40
  -4  -5   2    5.90    1.30
   4   5  -2    7.90    1.60
  -4   5   2    8.70    1.10
  -4   5   2    7.30    1.20
   4   5  -2   11.00    1.90
   3  -5  -2  328.27    8.90
  -3  -5   2  325.37    8.30
  -3  -5   2  329.47    9.30
   3  -5  -2  318.47    9.70
  -3   5   2  330.57    9.00
  -3   5   2  318.67    9.20
   3   5  -2  323.67   10.10
   3   5  -2  343.07    9.70
   2  -5  -2  463.35   11.70
  -2  -5   2  453.65   11.50
   2  -5  -2  467.85   12.40
  -2  -5   2  437.26   12.20
   2  -5  -2  435.36   12.40
   2   5  -2  463.25   12.50
   2   5  -2  445.06   12.80
  -2   5   2  451.75   12.00
   1  -5  -2  263.17    7.50
   1  -5  -2  255.77    7.80
   1   5  -2  282.27    8.30
   1   5  -2  276.47    7.60
  -1   5   2  268.27    7.80
   1   5  -2  287.37    8.40
   1   5  -2  274.97    8.40
  -1   5   2  294.27    7.70
   0  -5  -2  203.08    6.00
   0  -5  -2  206.18    6.80
   0   5  -2  211.08    6.50
   0   5  -2  198.48    6.30
   0   5  -2  207.68    6.80
   0   5  -2  207.88    5.90
   0   5   2  209.38    6.00
   0   5   2  209.28    6.10
  -1  -5  -2  567.44   14.60
   1  -5   2  570.24   14.70
  -1  -5  -2  547.15   15.70
   1  -5   2  557.84   15.00
   1   5   2  560.24   14.70
  -1   5  -2  559.84   14.50
  -1   5  -2  548.25   15.00
   1   5   2  564.14   14.70
  -2  -5  -2 1490.85   39.10
  -2  -5  -2 1522.75   37.80
   2  -5   2 1521.35   37.40
   2  -5   2 1472.85   38.20
  -2  -5  -2 1545.15   37.60
  -2   5  -2 1524.75   38.90
  -2   5  -2 1531.65   38.10
  -3  -5  -2   41.60    2.30
  -3  -5  -2   46.60    3.30
   3  -5   2   43.90    2.00
   3  -5   2   41.20    2.70
   3   5   2   43.60    2.70
  -3   5  -2   39.40    2.20
  -3   5  -2   52.79    3.30
   3   5   2   46.50    2.40
   4  -5   2  193.78    7.10
  -4  -5  -2  196.28    6.40
   4  -5   2  199.68    6.00
  -4  -5  -2  200.98    7.90
  -4   5  -2  200.58    6.60
   4   5   2  211.98    6.70
   4   5   2  197.88    7.40
  -4   5  -2  211.78    7.80
  -5  -5  -2   17.20    3.00
   5  -5   2   25.70    2.90
   5  -5   2   24.40    1.90
  -5  -5  -2   24.00    2.20
  -5   5  -2   23.70    3.00
  -5   5  -2   24.70    2.40
   5   5   2   20.40    2.70
   5   5   2   22.10    2.30
   6  -5   2    4.10    1.80
  -6  -5  -2    7.20    2.80
  -6  -5  -2    7.00    1.70
   6   5   2    8.10    2.30
  -6   5  -2    5.50    1.70
  -6   5  -2    8.70    2.70
   7  -5   2  196.58    8.50
  -7  -5  -2  181.48    9.60
   7   5   2  200.68    8.80
  -7   5  -2  186.58    7.40
  -7   5  -2  198.48    9.40
  -8  -5  -2   34.10    5.30
   8  -5   2   48.60    4.90
  -8   5  -2   48.00    3.90
  -8   5  -2   36.70    5.20
   8   5   2   41.00    5.00
  -9  -5  -2   43.80    6.20
   9  -5   2   49.10    5.10
  -9   5  -2   42.00    5.60
   9   5   2   50.29    5.80
  -9   5  -2   50.49    4.50
  10  -5   2   -0.70    2.90
 -10  -5  -2    4.30    4.40
  10   5   2    5.30    3.50
  11  -5   2   -3.90    3.00
 -11  -5  -2   -0.20    4.80
  11   5   2   -1.60    3.20
 -11  -6   2    2.70    3.40
 -10  -6   2   14.80    3.60
  10   6  -2   18.40    4.20
   9  -6  -2   24.30    3.70
   9  -6  -2   23.30    3.80
  -9  -6   2   23.30    3.70
   9   6  -2   23.10    4.00
  -9   6   2   19.20    2.90
   9   6  -2   22.20    4.20
  -9   6   2   18.10    2.40
   8  -6  -2   23.80    3.50
   8  -6  -2   18.20    3.00
  -8  -6   2   17.20    3.10
  -8   6   2   19.10    2.70
  -8   6   2   19.00    2.20
   8   6  -2   17.60    3.40
   8   6  -2   16.70    3.10
   7  -6  -2   39.20    3.90
   7  -6  -2   49.30    3.70
  -7  -6   2   42.70    3.40
  -7   6   2   47.30    2.80
   7   6  -2   52.39    4.90
   7   6  -2   42.10    4.00
  -7   6   2   41.80    3.10
   6  -6  -2   38.40    3.40
  -6  -6   2   43.00    3.00
   6  -6  -2   38.30    2.90
  -6   6   2   42.70    2.40
   6   6  -2   44.60    3.80
   6   6  -2   42.10    3.50
  -6   6   2   40.60    2.70
   5  -6  -2  180.08    6.90
   5  -6  -2  182.78    6.30
  -5  -6   2  181.28    6.40
  -5  -6   2  180.08    5.10
  -5   6   2  188.68    5.90
   5   6  -2  176.88    7.30
  -5   6   2  187.78    6.10
   5   6  -2  180.68    7.00
   4  -6  -2  168.48    5.40
   4  -6  -2  148.99    5.90
  -4  -6   2  155.58    4.30
  -4  -6   2  160.58    5.50
   4   6  -2  155.98    6.30
   4   6  -2  152.98    5.80
  -4   6   2  156.98    5.10
  -4   6   2  154.78    5.00
   3  -6  -2   78.59    3.50
  -3  -6   2   73.59    2.20
  -3  -6   2   67.49    3.00
   3  -6  -2   71.19    2.80
   3   6  -2   73.89    3.50
  -3   6   2   70.59    2.90
  -3   6   2   78.29    2.90
   3   6  -2   70.99    3.70
   2  -6  -2  855.11   21.30
   2  -6  -2  823.22   22.00
   2  -6  -2  836.22   21.80
  -2  -6   2  842.92   21.70
  -2  -6   2  855.91   20.90
  -2   6   2  846.32   21.40
   2   6  -2  853.41   22.20
   2   6  -2  827.22   22.40
  -1  -6   2 1163.48   30.40
   1  -6  -2 1212.58   30.70
   1  -6  -2 1251.67   30.60
   1   6  -2 1286.27   33.70
   1   6  -2 1346.77   33.70
  -1   6   2 1281.17   32.90
   1   6  -2 1324.87   32.70
  -1   6   2 1367.96   33.10
   0  -6  -2 2038.50   50.89
   0  -6  -2 2025.90   50.19
   0   6   2 2097.49   50.79
   0   6  -2 2000.00   51.29
   0   6  -2 2010.90   50.99
   0   6  -2 2085.69   51.69
   0   6  -2 2056.69   50.59
   0   6   2 2102.19   50.89
  -1  -6  -2 1130.69   30.20
   1  -6   2 1183.38   29.40
  -1  -6  -2 1161.78   29.20
  -1   6  -2 1177.48   30.10
  -1   6  -2 1144.99   28.50
   1   6   2 1136.49   28.70
  -1   6  -2 1107.49   28.90
   1   6   2 1128.19   28.80
   2  -6   2    0.80    0.90
  -2  -6  -2    2.20    0.90
  -2  -6  -2    0.90    0.80
  -2  -6  -2    5.00    1.60
   2  -6   2   -0.80    0.70
  -2   6  -2    0.90    0.70
  -2   6  -2    0.80    1.00
   2   6   2   -0.30    0.80
  -3  -6  -2  292.57    8.50
  -3  -6  -2  288.07    9.90
   3  -6   2  280.77    8.10
   3  -6   2  295.07    9.20
   3   6   2  299.27    8.70
  -3   6  -2  286.47    9.50
  -3   6  -2  307.17    8.70
   3   6   2  295.57    9.30
  -4  -6  -2   54.09    2.80
   4  -6   2   58.59    3.50
  -4  -6  -2   53.89    4.00
   4  -6   2   58.49    2.60
  -4   6  -2   54.69    2.90
   4   6   2   56.19    3.50
   4   6   2   58.29    3.10
  -4   6  -2   53.99    3.80
   5  -6   2   79.79    4.40
  -5  -6  -2   71.79    5.10
   5  -6   2   77.39    3.40
  -5  -6  -2   70.29    3.60
  -5   6  -2   71.89    3.60
  -5   6  -2   81.49    4.90
   5   6   2   75.09    4.40
   5   6   2   79.49    4.00
  -6  -6  -2  311.17   12.10
  -6  -6  -2  319.77   10.00
   6  -6   2  318.57   11.10
  -6   6  -2  331.37   10.30
  -6   6  -2  296.67   11.50
   6   6   2  343.67   11.70
   7  -6   2    6.70    2.40
  -7  -6  -2   14.40    3.70
   7   6   2   11.00    2.90
  -7   6  -2   11.50    3.30
  -7   6  -2   17.80    2.50
   8  -6   2   46.50    4.60
  -8  -6  -2   54.09    6.40
  -8   6  -2   37.80    5.20
   8   6   2   49.60    5.20
  -8   6  -2   40.60    3.80
  -9  -6  -2   36.10    6.20
   9  -6   2   38.90    4.80
  -9   6  -2   38.00    4.30
   9   6   2   35.90    5.00
  10  -6   2   12.00    4.00
 -10  -6  -2   19.00    5.30
  10   6   2    9.60    3.90
 -11  -6  -2   -1.90    4.30
  11  -6   2    5.30    3.60
  11   6   2    2.10    4.00
 -11  -7   2   45.30    6.00
 -10  -7   2   43.80    5.40
  10   7  -2   48.90    6.00
   9  -7  -2   37.90    4.60
  -9  -7   2   40.70    4.40
   9  -7  -2   49.90    4.70
  -9   7   2   41.00    3.40
   9   7  -2   36.40    5.00
   9   7  -2   37.70    4.80
  -9   7   2   38.20    3.90
   8  -7  -2   11.10    2.80
   8  -7  -2    8.10    2.30
  -8  -7   2    9.80    2.50
   8   7  -2   12.20    3.30
   8   7  -2   13.10    3.10
  -8   7   2   12.00    2.20
  -8   7   2   10.60    1.80
   7  -7  -2   33.20    3.40
   7  -7  -2   32.40    3.20
  -7  -7   2   36.00    3.20
  -7   7   2   34.80    2.90
   7   7  -2   34.00    4.20
  -7   7   2   35.80    2.60
   7   7  -2   38.60    4.00
   6  -7  -2  102.49    4.80
  -6  -7   2  113.49    5.00
   6  -7  -2  113.29    5.60
  -6   7   2  112.59    4.50
   6   7  -2  109.59    5.60
  -6   7   2  112.49    4.30
   6   7  -2  105.09    6.00
   5  -7  -2  192.58    6.70
  -5  -7   2  194.48    5.40
  -5  -7   2  198.58    6.90
   5  -7  -2  202.78    7.40
  -5   7   2  200.48    6.40
   5   7  -2  191.28    7.30
  -5   7   2  199.48    6.20
   5   7  -2  199.98    7.90
  -4  -7   2  174.08    6.00
   4  -7  -2  166.18    6.40
   4  -7  -2  177.08    5.80
  -4  -7   2  180.28    4.70
  -4   7   2  173.98    5.50
   4   7  -2  172.88    6.90
   4   7  -2  159.68    6.30
  -4   7   2  182.68    5.60
   3  -7  -2  224.18    7.60
  -3  -7   2  237.98    7.20
  -3  -7   2  238.88    6.00
   3  -7  -2  238.38    7.00
   3   7  -2  243.48    8.10
   3   7  -2  234.18    7.70
  -3   7   2  239.98    6.90
  -3   7   2  230.48    7.00
   2  -7  -2 1674.23   41.90
   2  -7  -2 1654.43   42.20
  -2  -7   2 1678.33   41.80
  -2  -7   2 1697.63   41.00
  -2   7   2 1729.53   42.30
  -2   7   2 1696.03   42.70
   2   7  -2 1670.63   43.40
   2   7  -2 1720.23   43.30
   1  -7  -2   53.49    2.70
  -1  -7   2   52.59    2.40
   1  -7  -2   57.29    2.70
   1   7  -2   51.99    3.00
  -1   7   2   54.59    2.40
  -1   7   2   60.99    2.70
   1   7  -2   57.59    3.20
   1   7  -2   61.59    2.20
   0  -7  -2 4887.71  119.59
   0  -7  -2 4905.91  120.09
   0   7  -2 5071.59  122.79
   0   7  -2 4939.11  122.39
   0   7   2 4962.50  121.69
   0   7   2 5091.99  121.89
   0   7  -2 5104.69  122.89
   0   7  -2 4809.12  121.79
  -1  -7  -2 1659.83   43.10
   1  -7   2 1701.23   42.40
  -1  -7  -2 1712.63   42.30
  -1   7  -2 1592.24   40.80
   1   7   2 1685.93   41.00
  -1   7  -2 1686.03   42.50
  -1   7  -2 1607.44   41.20
   1   7   2 1675.83   41.40
  -2  -7  -2  283.37    8.10
   2  -7   2  269.97    8.50
  -2  -7  -2  251.37    8.90
   2  -7   2  273.47    7.90
  -2   7  -2  265.67    8.30
   2   7   2  274.87    8.30
  -2   7  -2  273.47    7.80
   2   7   2  269.17    7.80
   3  -7   2  766.02   19.90
   3  -7   2  779.32   21.00
  -3  -7  -2  771.62   21.80
  -3  -7  -2  762.12   20.10
  -3   7  -2  786.42   20.40
  -3   7  -2  778.22   21.20
   3   7   2  782.42   20.60
   3   7   2  765.02   21.10
   4  -7   2   32.00    2.80
  -4  -7  -2   36.70    3.50
  -4  -7  -2   30.80    2.20
   4  -7   2   33.70    2.10
  -4   7  -2   34.70    3.20
   4   7   2   33.30    2.80
  -4   7  -2   29.30    2.30
   4   7   2   31.70    2.60
   5  -7   2   26.20    2.10
  -5  -7  -2   27.40    3.60
   5  -7   2   27.60    2.80
  -5  -7  -2   25.20    2.30
  -5   7  -2   30.70    2.30
   5   7   2   31.10    3.10
   5   7   2   25.30    2.60
  -5   7  -2   28.10    3.40
   6  -7   2   96.59    5.40
  -6  -7  -2  104.29    6.70
  -6  -7  -2  100.79    4.60
  -6   7  -2   94.69    5.90
   6   7   2  106.29    5.80
  -6   7  -2  101.49    4.70
  -7  -7  -2   49.20    5.50
   7  -7   2   54.09    4.70
  -7   7  -2   53.59    3.70
  -7   7  -2   50.69    5.10
   7   7   2   57.59    5.00
   8  -7   2   57.39    4.90
  -8  -7  -2   53.99    6.10
  -8   7  -2   49.99    4.10
   8   7   2   54.39    5.70
  -8   7  -2   47.60    5.40
  -9  -7  -2    6.70    4.10
   9  -7   2   12.50    3.30
  -9   7  -2   15.60    3.20
   9   7   2    6.80    3.40
  10  -7   2   16.20    4.00
 -10  -7  -2   10.30    4.60
  10   7   2   19.30    4.50
 -11  -7  -2   -0.80    4.20
  11  -7   2    6.60    4.20
  11   7   2    4.90    4.10
 -11  -8   2   10.20    4.10
 -10  -8   2   17.40    4.30
  10   8  -2   11.40    3.70
   9  -8  -2    9.00    3.00
  -9  -8   2   13.10    3.40
   9  -8  -2   10.00    3.00
  -9   8   2   15.20    2.50
   9   8  -2   10.20    3.40
   9   8  -2    7.70    3.10
  -8  -8   2    3.70    2.40
   8  -8  -2    3.30    2.10
   8  -8  -2    3.80    2.10
  -8   8   2    8.00    1.70
   8   8  -2    2.00    2.70
   8   8  -2    4.00    2.50
  -8   8   2    1.60    1.60
   7  -8  -2   29.60    3.40
  -7  -8   2   22.50    2.80
   7  -8  -2   30.80    3.20
   7   8  -2   28.70    3.80
  -7   8   2   29.00    2.40
   7   8  -2   29.70    3.60
  -7   8   2   30.00    2.60
  -6  -8   2   24.20    2.50
   6  -8  -2   18.80    2.60
   6  -8  -2   19.20    2.30
  -6   8   2   20.40    1.80
  -6   8   2   21.80    2.10
   6   8  -2   21.90    2.90
   6   8  -2   17.90    3.10
  -5  -8   2  167.68    6.30
   5  -8  -2  174.48    6.20
   5  -8  -2  174.48    6.90
  -5  -8   2  177.58    4.80
   5   8  -2  172.98    7.40
  -5   8   2  174.68    5.80
  -5   8   2  182.28    5.90
   5   8  -2  174.58    7.00
   4  -8  -2   35.90    2.30
   4  -8  -2   37.70    3.00
  -4  -8   2   39.90    1.30
  -4  -8   2   39.40    2.50
   4   8  -2   38.60    3.00
   4   8  -2   41.10    3.30
  -4   8   2   42.60    2.20
  -4   8   2   39.20    2.10
  -3  -8   2  467.95   11.50
   3  -8  -2  471.75   12.70
  -3  -8   2  460.95   12.80
   3  -8  -2  453.65   13.30
  -3   8   2  455.75   12.50
  -3   8   2  462.65   12.50
   3   8  -2  477.95   13.90
   3   8  -2  458.85   13.50
   2  -8  -2   48.40    2.70
  -2  -8   2   56.19    1.90
  -2  -8   2   54.49    2.40
   2  -8  -2   52.69    2.50
   2   8  -2   48.50    3.20
  -2   8   2   56.09    2.40
   2   8  -2   56.59    3.10
  -2   8   2   54.79    2.80
   1  -8  -2   35.40    2.30
  -1  -8   2   37.10    1.90
   1  -8  -2   35.70    2.20
   1   8  -2   38.80    1.60
  -1   8   2   37.00    2.20
   1   8  -2   38.80    2.60
   1   8  -2   35.90    2.70
   0  -8  -2    8.80    1.80
   0  -8  -2    9.40    1.50
   0   8   2    6.50    1.20
   0   8  -2   11.00    1.10
   0   8  -2    7.30    1.60
   0   8   2   12.50    1.50
   0   8  -2    9.20    1.70
   0   8  -2   10.00    1.30
   1  -8   2  482.45   13.40
  -1  -8  -2  485.75   13.30
  -1  -8  -2  470.65   13.90
  -1   8  -2  482.35   12.60
  -1   8  -2  479.25   14.20
   1   8   2  474.35   12.70
   1   8   2  482.45   13.20
  -1   8  -2  465.35   12.80
  -2  -8  -2  489.15   14.70
  -2  -8  -2  492.15   13.60
   2  -8   2  494.05   14.10
   2  -8   2  506.25   13.60
   2   8   2  481.75   13.60
   2   8   2  484.85   13.00
  -2   8  -2  484.65   13.40
  -2   8  -2  486.15   13.00
  -3  -8  -2  409.36   11.50
  -3  -8  -2  422.86   11.80
  -3  -8  -2  396.76   13.10
   3  -8   2  422.56   12.40
   3  -8   2  408.46   11.40
  -3   8  -2  404.06   11.50
   3   8   2  412.96   12.30
  -3   8  -2  414.16   12.20
   4  -8   2  264.67    7.80
  -4  -8  -2  243.68    9.60
  -4  -8  -2  250.17    7.80
   4  -8   2  253.17    8.70
  -4   8  -2  245.48    8.80
   4   8   2  255.07    8.80
   4   8   2  259.27    8.30
  -4   8  -2  242.58    7.80
   5  -8   2  252.47    7.80
   5  -8   2  234.38    8.70
  -5  -8  -2  227.38    9.60
  -5  -8  -2  249.38    7.90
   5   8   2  267.57    8.70
   5   8   2  254.77    9.30
  -5   8  -2  248.38    9.30
  -5   8  -2  240.28    8.20
  -6  -8  -2   22.20    2.50
   6  -8   2   22.00    3.00
  -6  -8  -2   28.70    4.10
   6   8   2   24.90    3.30
  -6   8  -2   30.20    2.70
  -6   8  -2   23.10    3.60
  -7  -8  -2   42.70    5.30
   7  -8   2   33.20    3.90
   7   8   2   41.80    4.70
  -7   8  -2   27.70    4.20
  -7   8  -2   34.70    3.10
  -8  -8  -2   -2.50    3.00
   8  -8   2    2.00    2.30
   8   8   2    0.10    2.40
  -8   8  -2    5.60    2.30
   9  -8   2    5.70    3.00
  -9  -8  -2    3.70    3.80
  -9   8  -2    1.30    2.20
   9   8   2    1.20    2.90
 -10  -8  -2   29.00    6.60
  10  -8   2   33.10    5.40
  10   8   2   28.20    5.60
 -10   8  -2   20.00    3.80
 -11  -8  -2    5.00    5.40
  11  -8   2   -2.80    3.40
  11   8   2   -0.20    4.10
 -11  -9   2   46.70    6.60
 -10  -9   2   17.50    3.90
  10   9  -2   16.50    4.20
  -9  -9   2   50.89    4.80
   9  -9  -2   59.89    5.30
  -9   9   2   60.99    4.00
   9   9  -2   55.49    5.70
   9   9  -2   47.70    5.70
  -8  -9   2   38.40    3.90
   8  -9  -2   41.20    4.40
   8  -9  -2   40.70    4.00
   8   9  -2   40.60    4.60
  -8   9   2   35.80    2.80
   8   9  -2   37.70    4.80
  -8   9   2   40.40    3.40
  -7  -9   2  105.29    5.30
   7  -9  -2  100.09    5.30
   7  -9  -2  105.29    5.90
   7   9  -2  105.69    6.20
   7   9  -2   98.49    6.60
  -7   9   2  114.09    4.90
  -7   9   2  108.19    4.50
  -6  -9   2   27.40    2.60
   6  -9  -2   21.30    2.90
   6  -9  -2   28.70    2.90
   6   9  -2   29.00    3.40
  -6   9   2   28.70    2.20
   6   9  -2   24.50    3.40
  -6   9   2   34.50    2.40
  -5  -9   2   57.69    3.30
   5  -9  -2   60.09    3.90
   5  -9  -2   68.79    3.40
   5   9  -2   59.19    3.90
  -5   9   2   67.59    3.00
   5   9  -2   65.39    4.50
  -5   9   2   65.99    3.00
   4  -9  -2   87.09    4.20
   4  -9  -2   86.19    3.70
  -4  -9   2   82.79    3.80
  -4  -9   2   85.29    2.40
   4   9  -2   90.39    4.50
  -4   9   2   86.49    3.40
  -4   9   2   88.59    3.40
   4   9  -2   91.59    4.90
  -3  -9   2   35.30    2.20
   3  -9  -2   30.90    2.10
   3  -9  -2   32.60    2.50
   3   9  -2   27.60    2.50
  -3   9   2   29.90    1.80
   3   9  -2   28.80    2.80
  -3   9   2   28.80    1.70
  -2  -9   2  337.17    8.70
   2  -9  -2  341.97    9.60
   2  -9  -2  327.67   10.00
  -2  -9   2  340.57    9.50
   2   9  -2  352.96   10.90
  -2   9   2  334.47   10.20
  -2   9   2  351.46    9.60
   2   9  -2  345.67   10.70
   1  -9  -2  183.38    6.00
  -1  -9   2  185.68    5.50
   1  -9  -2  167.88    5.80
  -1   9   2  193.68    6.20
   1   9  -2  172.88    6.60
   1   9  -2  185.88    6.70
   1   9  -2  186.48    5.20
  -1   9   2  179.78    5.50
   0  -9  -2  275.67    8.30
   0  -9  -2  263.17    8.40
   0   9  -2  289.97    8.20
   0   9  -2  274.37    9.10
   0   9   2  296.27    8.70
   0   9  -2  292.77    9.50
   0   9   2  288.47    8.20
   0   9  -2  286.07    7.90
  -1  -9  -2  185.48    6.80
   1  -9   2  200.48    6.60
  -1  -9  -2  189.38    6.50
  -1   9  -2  198.88    6.00
   1   9   2  192.78    6.50
  -1   9  -2  193.28    5.80
  -1   9  -2  200.28    7.40
   1   9   2  196.08    5.90
   2  -9   2  128.89    4.90
  -2  -9  -2  118.29    5.40
   2  -9   2  120.99    5.00
  -2  -9  -2  124.19    4.80
   2   9   2  124.99    5.00
  -2   9  -2  125.99    4.50
   2   9   2  117.09    4.20
  -2   9  -2  123.09    4.20
  -3  -9  -2  184.28    7.60
  -3  -9  -2  198.08    6.60
   3  -9   2  194.48    6.40
   3  -9   2  206.48    7.20
  -3   9  -2  195.48    6.40
   3   9   2  199.68    6.30
  -3   9  -2  201.98    7.00
   3   9   2  205.38    7.30
   4  -9   2  454.45   12.60
  -4  -9  -2  447.06   12.60
  -4  -9  -2  439.66   14.60
   4  -9   2  453.95   13.70
  -4   9  -2  464.95   14.00
   4   9   2  456.55   14.10
   4   9   2  478.75   13.70
  -4   9  -2  449.46   13.10
  -5  -9  -2   86.39    3.90
  -5  -9  -2   80.89    5.50
   5  -9   2   85.39    4.70
   5  -9   2   85.19    3.80
   5   9   2   87.99    4.60
   5   9   2   84.99    4.90
  -5   9  -2   84.29    4.10
  -5   9  -2   75.69    4.80
  -6  -9  -2  153.38    8.30
   6  -9   2  180.78    7.70
  -6   9  -2  179.08    8.20
  -6   9  -2  178.98    6.80
   6   9   2  186.68    8.20
  -7  -9  -2    5.20    3.10
   7  -9   2    1.30    2.00
  -7   9  -2    0.20    2.60
  -7   9  -2    2.40    1.70
   7   9   2   -0.60    2.20
  -8  -9  -2   14.80    4.10
   8  -9   2   12.80    3.00
   8   9   2   17.70    3.70
  -8   9  -2   12.80    2.60
   9  -9   2   38.20    4.90
  -9  -9  -2   33.80    5.90
  -9   9  -2   43.60    4.10
   9   9   2   35.70    5.30
  10  -9   2   -0.60    2.90
 -10  -9  -2    2.30    4.70
 -10   9  -2    0.70    2.60
  10   9   2    1.20    3.20
 -11  -9  -2   -0.10    5.10
  11  -9   2   -3.80    2.80
  11   9   2    3.40    3.90
 -11 -10   2   20.00    4.80
 -10 -10   2   -1.10    2.70
  10  10  -2    6.80    3.50
 -10  10   2    4.80    2.10
   9 -10  -2   23.00    3.80
  -9 -10   2   26.10    4.20
   9  10  -2   13.00    4.00
  -9  10   2   22.90    2.90
   9  10  -2   25.30    4.30
   8 -10  -2   55.39    4.80
  -8 -10   2   55.09    4.50
   8 -10  -2   49.80    4.30
  -8  10   2   50.59    3.50
   8  10  -2   50.79    5.20
   8  10  -2   52.89    5.30
  -7 -10   2   16.70    2.60
   7 -10  -2   14.20    2.50
   7 -10  -2   14.20    2.70
   7  10  -2   17.70    3.40
  -7  10   2   15.20    2.10
   7  10  -2   14.00    3.10
  -7  10   2   14.10    2.10
   6 -10  -2   39.80    3.00
  -6 -10   2   33.20    2.80
   6 -10  -2   30.30    3.30
  -6  10   2   40.30    2.50
  -6  10   2   36.30    2.40
   6  10  -2   39.70    4.10
   6  10  -2   41.50    3.70
  -5 -10   2   12.20    1.80
   5 -10  -2    9.00    1.90
   5 -10  -2   14.20    1.90
   5  10  -2   15.50    2.50
   5  10  -2   11.70    2.50
  -5  10   2   15.20    1.50
  -5  10   2   14.10    1.60
  -4 -10   2  363.66   10.70
   4 -10  -2  350.46   10.60
   4 -10  -2  366.86   11.40
  -4  10   2  358.66    9.90
   4  10  -2  365.16   11.60
  -4  10   2  351.86   10.10
   4  10  -2  359.96   12.00
   3 -10  -2   48.30    2.70
  -3 -10   2   47.20    2.50
   3 -10  -2   51.79    3.10
  -3  10   2   47.10    2.20
  -3  10   2   47.20    2.30
   3  10  -2   47.70    3.30
   3  10  -2   47.70    3.50
   2 -10  -2  184.38    5.90
  -2 -10   2  191.58    5.80
   2 -10  -2  179.58    6.40
   2  10  -2  190.08    7.20
  -2  10   2  197.58    6.70
  -2  10   2  190.88    5.90
   2  10  -2  194.78    7.10
  -1 -10   2   -0.70    0.50
   1 -10  -2   -0.20    0.80
   1 -10  -2    0.70    1.00
   1  10  -2    0.30    1.10
   1  10  -2    2.40    0.60
  -1  10   2    1.00    1.00
  -1  10   2    2.50    0.80
   1  10  -2   -1.00    1.20
   0 -10  -2   19.30    2.00
   0 -10   2   22.90    2.30
   0 -10  -2   16.10    1.90
   0  10  -2   16.90    1.40
   0  10  -2   20.50    2.40
   0  10  -2   20.10    1.20
   0  10   2   16.70    1.80
   0  10   2   17.90    1.50
  -1 -10  -2 2830.52   70.79
   1 -10   2 2885.21   70.89
  -1 -10  -2 2808.12   71.19
   1  10   2 2955.80   70.89
  -1  10  -2 2756.12   70.79
   1  10   2 2834.02   71.79
  -1  10  -2 2982.90   73.09
  -1  10  -2 2896.61   70.79
  -2 -10  -2   15.40    2.30
  -2 -10  -2   18.50    2.10
   2 -10   2   26.80    2.30
  -2  10  -2   18.50    2.80
  -2  10  -2   19.90    1.80
  -2  10  -2   19.30    1.50
   2  10   2   21.80    2.30
   2  10   2   21.60    1.70
   3 -10   2  221.38    7.10
   3 -10   2  218.28    7.80
  -3 -10  -2  219.78    8.40
  -3 -10  -2  216.48    7.30
   3  10   2  211.88    7.60
  -3  10  -2  211.78    6.70
   3  10   2  220.58    6.60
  -3  10  -2  205.78    7.10
  -4 -10  -2  233.98    9.40
   4 -10   2  245.38    7.70
   4 -10   2  250.87    8.70
  -4 -10  -2  240.68    7.60
   4  10   2  247.18    8.90
  -4  10  -2  244.38    8.60
   4  10   2  253.17    8.60
  -4  10  -2  245.78    7.90
   5 -10   2   45.90    2.90
   5 -10   2   44.20    3.60
  -5 -10  -2   46.70    2.90
  -5 -10  -2   41.40    4.30
  -5  10  -2   44.90    3.80
   5  10   2   43.40    3.60
   5  10   2   47.20    3.80
  -5  10  -2   41.20    2.80
   6 -10   2  573.54   17.00
  -6 -10  -2  509.65   18.10
  -6  10  -2  567.44   16.40
  -6  10  -2  542.75   17.60
   6  10   2  567.04   17.90
  -7 -10  -2   10.70    3.60
   7 -10   2    5.50    2.40
   7  10   2    8.00    3.00
  -7  10  -2    5.30    2.00
  -8 -10  -2   14.50    4.10
   8 -10   2    7.90    3.00
  -8  10  -2   13.20    2.70
   8  10   2   11.80    3.50
  -9 -10  -2   18.20    5.10
   9 -10   2   35.00    4.80
  -9  10  -2   30.30    4.10
   9  10   2   30.60    5.00
  10 -10   2    8.10    3.40
 -10 -10  -2   -2.20    4.20
 -10  10  -2   11.50    3.30
  10  10   2   12.90    4.30
 -11 -10  -2   -7.10    4.70
  11 -10   2    2.90    3.30
  11  10   2    0.40    4.10
 -11 -11   2    0.60    3.70
  11  11  -2    1.80    3.50
 -10 -11   2   45.30    5.70
  10  11  -2   47.60    6.00
 -10  11   2   42.50    3.80
   9 -11  -2   36.60    4.50
  -9 -11   2   41.00    4.80
  -9  11   2   37.80    3.30
   9  11  -2   40.10    5.20
   9  11  -2   34.30    5.20
  -8 -11   2   33.10    4.00
   8 -11  -2   30.50    3.80
   8 -11  -2   28.90    3.50
   8  11  -2   29.50    4.40
  -8  11   2   34.00    3.10
   8  11  -2   26.30    4.10
   7 -11  -2    3.70    1.80
  -7 -11   2    2.50    2.00
   7 -11  -2    3.20    2.00
   7  11  -2    6.30    2.80
   7  11  -2    2.90    2.50
  -7  11   2    2.30    1.40
  -7  11   2    2.50    1.40
   6 -11  -2   21.90    2.50
   6 -11  -2   27.20    3.20
  -6 -11   2   20.60    2.50
  -6  11   2   21.70    2.10
   6  11  -2   23.50    3.70
   6  11  -2   25.50    3.20
  -6  11   2   22.90    2.00
   5 -11  -2   38.40    2.80
   5 -11  -2   38.80    3.20
  -5 -11   2   40.60    2.80
   5  11  -2   42.50    3.60
   5  11  -2   46.10    4.30
  -5  11   2   47.10    2.60
  -5  11   2   44.70    2.30
  -4 -11   2   90.69    4.00
   4 -11  -2   89.19    4.50
   4 -11  -2   90.29    4.00
  -4  11   2  100.39    3.80
  -4  11   2   97.79    3.50
   4  11  -2   91.39    5.30
   4  11  -2  101.69    5.20
   3 -11  -2   55.89    3.40
  -3 -11   2   58.89    2.80
  -3  11   2   58.19    2.80
   3  11  -2   62.69    3.80
  -3  11   2   63.19    3.90
   3  11  -2   60.39    4.20
  -3  11   2   59.89    2.60
   2 -11  -2   72.89    3.80
  -2 -11   2   76.09    3.00
   2 -11  -2   79.19    3.20
   2  11  -2   72.69    4.10
   2  11  -2   80.39    2.50
   2  11  -2   72.69    4.30
  -2  11   2   74.59    3.90
  -2  11   2   81.49    3.10
   1 -11  -2   22.10    1.90
  -1 -11   2   23.10    1.50
   1 -11  -2   36.00    2.40
   1  11  -2   27.70    2.60
  -1  11   2   27.20    1.70
   1  11  -2   25.10    2.70
   1  11  -2   31.20    1.40
  -1  11   2   24.50    2.30
   0 -11  -2  355.96   10.60
   0 -11   2  358.16   10.80
   0 -11   2  331.77    9.40
   0 -11  -2  357.26   10.60
   0  11   2  377.26   10.30
   0  11   2  379.66   11.30
   0  11  -2  373.56   10.00
   0  11  -2  364.16   11.90
  -1 -11  -2   10.30    2.00
   1 -11   2    4.50    1.50
   1  11   2    9.50    1.60
  -1  11  -2    8.00    1.90
   1  11   2    8.30    1.10
  -1  11  -2    9.30    1.10
  -1  11  -2    9.60    1.10
   2 -11   2   28.60    2.60
  -2 -11  -2   29.80    2.60
  -2 -11  -2   21.70    2.70
  -2  11  -2   25.60    3.30
  -2  11  -2   26.30    2.00
  -2  11  -2   26.40    1.70
   2  11   2   30.30    1.90
   2  11   2   27.50    2.50
  -3 -11  -2  158.08    6.90
  -3 -11  -2  157.18    6.10
   3 -11   2  161.28    6.40
   3 -11   2  169.78    5.90
  -3  11  -2  165.48    6.00
   3  11   2  163.18    5.40
  -3  11  -2  166.58    5.60
   3  11   2  171.58    6.70
   4 -11   2   27.70    2.30
  -4 -11  -2   29.20    3.60
   4 -11   2   36.80    3.10
   4  11   2   26.10    2.90
  -4  11  -2   31.00    2.40
   4  11   2   37.50    3.40
  -4  11  -2   31.40    2.90
   4  11   2   28.80    2.20
   5 -11   2  735.53   20.90
  -5 -11  -2  681.53   21.80
  -5 -11  -2  714.03   19.30
   5 -11   2  732.43   19.60
  -5  11  -2  689.53   20.10
  -5  11  -2  696.63   20.90
   5  11   2  775.22   21.10
   5  11   2  777.32   21.70
   6 -11   2   53.89    4.10
  -6 -11  -2   40.60    5.00
  -6  11  -2   46.80    4.40
  -6  11  -2   43.50    3.30
   6  11   2   50.59    4.50
  -7 -11  -2   22.00    4.30
   7 -11   2   36.00    4.20
  -7  11  -2   34.30    3.20
   7  11   2   29.90    4.30
  -8 -11  -2    3.10    3.50
   8 -11   2    5.50    2.80
  -8  11  -2    7.50    2.30
   8  11   2    4.50    3.00
  -9 -11  -2    1.40    3.80
   9 -11   2    2.10    2.50
   9  11   2    2.30    3.10
  -9  11  -2    1.20    2.30
  10 -11   2   27.00    4.90
 -10 -11  -2   19.70    6.00
 -10  11  -2   21.50    3.80
  10  11   2   28.90    5.40
  11 -11   2   23.10    5.00
  11  11   2    8.30    4.60
 -11 -12   2    1.50    4.10
  11  12  -2   10.80    4.60
 -10 -12   2    3.40    3.10
  10  12  -2    5.30    3.40
 -10  12   2    5.10    2.30
   9 -12  -2    5.80    2.90
  -9 -12   2    6.80    2.90
  -9  12   2    5.00    2.20
   9  12  -2    8.00    3.20
   9  12  -2    7.30    3.70
  -8 -12   2  145.09    7.30
   8 -12  -2  153.68    7.20
   8 -12  -2  142.99    7.50
   8  12  -2  133.69    8.10
  -8  12   2  144.09    5.90
   8  12  -2  149.88    8.30
  -7 -12   2  132.59    6.30
   7 -12  -2  130.29    6.10
   7 -12  -2  129.99    6.80
   7  12  -2  119.79    6.90
   7  12  -2  127.69    7.40
  -7  12   2  126.99    5.20
  -6 -12   2   50.89    3.50
   6 -12  -2   53.69    3.60
   6 -12  -2   48.90    4.10
   6  12  -2   52.99    5.00
  -6  12   2   50.09    2.90
  -6  12   2   49.40    2.80
   6  12  -2   51.29    4.30
   5 -12  -2   26.10    2.50
  -5 -12   2   23.80    2.30
   5 -12  -2   22.60    2.70
  -5  12   2   27.90    1.90
   5  12  -2   23.40    3.20
   5  12  -2   25.50    3.50
  -5  12   2   26.70    2.10
   4 -12  -2  307.87   10.20
   4 -12  -2  308.07    9.60
  -4 -12   2  303.87    9.40
  -4  12   2  308.07    8.60
  -4  12   2  310.97    9.10
   4  12  -2  295.97   10.50
   4  12  -2  313.57   11.10
  -3 -12   2   -0.40    0.80
   3 -12  -2    0.00    1.20
  -3  12   2    4.00    1.00
   3  12  -2    2.50    1.60
   3  12  -2    1.10    1.70
  -3  12   2    1.50    0.80
  -3  12   2    2.30    1.60
   2 -12  -2  458.25   13.20
  -2 -12   2  447.46   12.10
   2 -12  -2  423.36   12.00
   2  12  -2  423.76   13.70
   2  12  -2  443.46   13.70
  -2  12   2  456.55   13.40
  -2  12   2  433.66   12.00
   2  12  -2  443.66   11.20
   1 -12  -2  494.85   14.30
   1 -12  -2  484.25   13.60
  -1 -12   2  504.15   13.10
  -1  12   2  508.15   14.90
   1  12  -2  471.45   15.10
   1  12  -2  534.55   13.20
  -1  12   2  511.95   13.60
   1  12  -2  511.95   15.40
   0 -12  -2  125.49    5.30
   0 -12  -2  127.09    5.20
   0 -12   2  136.39    5.50
   0 -12   2  131.69    4.10
   0  12   2  145.39    5.60
   0  12  -2  137.39    4.30
   0  12  -2  137.39    6.20
   0  12   2  138.29    4.60
   1 -12   2  158.28    6.40
  -1 -12  -2  161.48    6.30
  -1 -12  -2  167.58    6.40
  -1  12  -2  174.98    7.30
  -1  12  -2  162.88    5.20
   1  12   2  163.38    5.30
   1  12   2  181.68    6.50
  -1  12  -2  164.98    5.10
  -2 -12  -2  413.86   13.10
   2 -12   2  413.96   12.50
  -2 -12  -2  408.06   12.40
   2  12   2  426.46   12.90
  -2  12  -2  418.16   11.60
   2  12   2  427.36   11.50
  -2  12  -2  435.46   14.30
  -2  12  -2  405.76   11.50
   3 -12   2  265.37    9.20
  -3 -12  -2  265.47    9.80
  -3 -12  -2  269.77    8.90
   3 -12   2  257.77    8.60
   3  12   2  266.27    9.20
   3  12   2  271.07    7.80
  -3  12  -2  255.47    8.00
  -3  12  -2  260.77    8.20
   4 -12   2   75.09    4.40
  -4 -12  -2   74.79    5.00
   4 -12   2   80.29    3.90
  -4 -12  -2   83.29    4.30
   4  12   2   82.29    3.50
   4  12   2   83.19    4.90
  -4  12  -2   87.29    4.40
  -4  12  -2   81.69    3.80
   5 -12   2   33.80    2.70
   5 -12   2   39.70    3.70
  -5 -12  -2   33.70    4.20
   5  12   2   41.30    3.90
  -5  12  -2   36.80    2.80
   5  12   2   45.90    4.30
  -5  12  -2   37.70    3.60
   5  12   2   39.40    2.70
   6 -12   2   29.10    3.50
  -6 -12  -2   24.80    4.20
   6  12   2   22.90    3.60
  -6  12  -2   28.30    3.00
   7 -12   2   53.79    4.60
  -7 -12  -2   46.70    5.80
   7  12   2   65.89    5.90
  -7  12  -2   64.29    4.20
  -8 -12  -2   35.30    5.70
   8 -12   2   39.30    4.50
   8  12   2   29.60    4.60
  -8  12  -2   27.60    3.40
  -9 -12  -2    3.10    4.00
   9 -12   2    9.50    3.40
   9  12   2    6.10    3.40
  -9  12  -2    7.10    2.50
  10 -12   2    1.40    2.90
 -10 -12  -2   -1.40    4.40
  10  12   2   -2.90    3.50
 -10  12  -2    8.20    3.10
  11 -12   2   -4.40    2.80
 -11 -13   2   -5.30    3.20
  11  13  -2    6.00    4.30
 -10 -13   2   16.10    4.40
  10  13  -2   17.30    4.60
 -10  13   2   23.50    3.40
   9 -13  -2   78.79    6.20
  -9 -13   2   85.99    6.20
   9  13  -2   80.69    6.70
   9  13  -2   78.09    6.90
  -9  13   2   69.69    4.60
  -8 -13   2    7.40    2.60
   8 -13  -2    6.70    2.40
   8 -13  -2    2.70    2.40
  -8  13   2    1.90    1.60
   8  13  -2    3.50    2.90
   8  13  -2    2.50    2.80
   7 -13  -2  313.87   10.80
   7 -13  -2  292.77   11.10
  -7 -13   2  303.17   10.80
   7  13  -2  306.67   12.20
  -7  13   2  302.97    9.80
   7  13  -2  296.37   12.40
  -6 -13   2   79.99    4.40
   6 -13  -2   75.59    4.80
   6 -13  -2   73.69    4.30
   6  13  -2   76.39    5.70
   6  13  -2   80.19    5.30
  -6  13   2   71.89    3.50
  -6  13   2   73.69    3.70
   5 -13  -2   66.99    4.20
  -5 -13   2   60.79    3.60
   5 -13  -2   60.49    3.70
   5  13  -2   64.29    4.70
  -5  13   2   60.69    2.80
   5  13  -2   60.59    5.10
  -5  13   2   61.99    3.10
   4 -13  -2  106.59    5.20
   4 -13  -2  119.29    4.90
  -4 -13   2  105.69    4.60
  -4  13   2  114.49    3.80
  -4  13   2  115.99    4.30
   4  13  -2  111.19    5.70
   4  13  -2  100.89    5.80
   3 -13  -2  125.79    5.40
  -3 -13   2  115.69    4.50
  -3  13   2  115.79    5.70
   3  13  -2  119.19    5.90
   3  13  -2  119.39    6.00
  -3  13   2  121.59    4.00
  -3  13   2  126.59    4.40
   2 -13  -2  159.18    6.10
   2 -13  -2  146.29    5.00
  -2 -13   2  154.58    5.00
  -2  13   2  154.98    5.20
   2  13  -2  162.48    4.50
   2  13  -2  167.78    7.00
  -2  13   2  154.48    6.40
   2  13  -2  159.48    6.90
  -1 -13   2   57.49    2.40
   1 -13  -2   51.09    2.80
   1 -13  -2   62.89    3.50
  -1  13   2   60.69    2.70
   1  13  -2   58.49    4.00
  -1  13   2   72.89    4.00
   1  13  -2   66.19    4.20
   1  13  -2   65.99    2.40
   0 -13   2   77.89    4.20
   0 -13  -2   74.39    4.10
   0 -13  -2   71.09    3.80
   0 -13   2   71.09    2.70
   0  13   2   68.39    2.90
   0  13   2   72.49    3.90
   0  13  -2   64.39    4.30
   0  13  -2   70.49    2.70
   1 -13   2  155.98    6.50
  -1 -13  -2  148.49    6.30
  -1 -13  -2  149.59    6.20
  -1  13  -2  160.38    5.10
  -1  13  -2  165.48    7.10
   1  13   2  150.78    6.20
   1  13   2  152.98    5.00
  -1  13  -2  153.88    4.80
   2 -13   2   73.89    4.20
  -2 -13  -2   68.19    4.30
  -2 -13  -2   68.59    4.20
  -2  13  -2   75.49    5.20
   2  13   2   73.69    4.20
  -2  13  -2   70.49    3.00
   2  13   2   76.59    3.00
  -2  13  -2   65.89    2.90
   3 -13   2  294.97    9.50
  -3 -13  -2  289.97   10.60
   3 -13   2  304.97   10.30
  -3 -13  -2  298.47    9.90
  -3  13  -2  306.17    9.20
  -3  13  -2  302.37    9.20
   3  13   2  313.37    8.90
   3  13   2  310.87   10.50
   4 -13   2   97.39    4.60
  -4 -13  -2   99.99    5.00
   4 -13   2   99.29    5.10
  -4 -13  -2   97.59    5.70
   4  13   2   96.49    3.80
  -4  13  -2   92.59    4.40
   4  13   2   97.49    5.30
  -4  13  -2   88.19    4.00
  -5 -13  -2  156.88    8.00
   5 -13   2  165.28    6.30
   5 -13   2  162.88    7.10
  -5  13  -2  157.18    6.90
   5  13   2  160.08    7.50
   5  13   2  180.38    7.50
  -5  13  -2  164.98    6.30
   6 -13   2  240.88    9.50
  -6 -13  -2  229.58   10.70
  -6  13  -2  245.38    8.90
   6  13   2  249.38   10.30
  -7 -13  -2   97.39    7.40
   7 -13   2  114.59    6.40
  -7  13  -2  106.79    5.40
   7  13   2   99.19    6.80
  -8 -13  -2   10.70    4.40
   8 -13   2    7.10    2.70
   8  13   2    4.00    3.20
  -8  13  -2    7.70    2.50
   9 -13   2   25.20    4.20
  -9 -13  -2   11.20    4.70
  -9  13  -2   15.60    3.10
   9  13   2   17.90    4.50
  10 -13   2   20.90    4.40
 -10 -13  -2   16.70    6.00
 -10  13  -2   17.90    3.90
  10  13   2   20.00    5.20
  11 -13   2    3.80    3.90
 -11  13  -2    7.60    3.70
 -11 -14   2   32.50    6.00
  11  14  -2   42.60    6.50
 -10 -14   2    6.80    3.60
  10  14  -2   10.30    4.30
 -10  14   2    7.30    2.50
  -9 -14   2   35.60    4.70
   9 -14  -2   36.20    4.70
  -9  14   2   29.00    3.30
   9  14  -2   36.10    5.30
   9  14  -2   32.60    5.40
   8 -14  -2  123.59    6.50
   8 -14  -2  107.79    6.70
  -8 -14   2  116.19    6.50
   8  14  -2  118.79    7.60
  -8  14   2  119.79    5.50
   8  14  -2  102.79    7.40
  -7 -14   2    9.20    2.40
   7 -14  -2   13.40    2.70
   7 -14  -2   18.80    2.90
  -7  14   2   14.30    2.30
   7  14  -2   14.40    3.30
   7  14  -2   17.00    3.90
   6 -14  -2  111.19    6.00
  -6 -14   2  103.89    5.20
   6 -14  -2  102.69    5.30
   6  14  -2   95.29    6.20
  -6  14   2   94.99    4.30
   6  14  -2   99.39    6.80
  -5 -14   2    6.20    1.60
   5 -14  -2   11.20    2.00
   5 -14  -2    8.20    2.10
   5  14  -2    5.70    2.30
  -5  14   2    7.50    1.20
  -5  14   2    9.80    1.60
   5  14  -2    6.50    2.80
   4 -14  -2   17.80    2.60
  -4 -14   2   16.00    2.00
   4 -14  -2   18.50    2.20
  -4  14   2   16.80    1.80
  -4  14   2   15.00    1.30
   4  14  -2   19.40    2.90
   4  14  -2   15.60    3.10
  -3 -14   2   59.79    3.00
   3 -14  -2   50.49    3.60
   3  14  -2   58.39    4.40
  -3  14   2   55.49    2.80
  -3  14   2   54.09    2.40
   3  14  -2   60.49    4.20
  -3  14   2   58.69    3.90
   2 -14  -2  442.76   13.60
  -2 -14   2  451.45   12.50
   2 -14  -2  459.45   12.40
  -2  14   2  474.35   12.90
   2  14  -2  468.55   15.00
  -2  14   2  487.85   14.60
   2  14  -2  454.35   14.90
   2  14  -2  479.85   12.10
   1 -14  -2  228.48    7.50
   1 -14  -2  244.68    8.50
  -1 -14   2  239.48    6.90
   1  14  -2  245.08    9.30
   1  14  -2  258.87    6.90
   1  14  -2  237.88    9.10
  -1  14   2  239.58    8.70
  -1  14   2  241.58    7.30
   0 -14  -2   33.90    3.00
   0 -14   2   33.80    1.70
   0 -14   2   30.00    3.00
   0 -14  -2   29.60    2.70
   0  14  -2   34.60    1.80
   0  14   2   32.70    2.00
   0  14   2   31.30    3.00
   0  14  -2   37.30    3.50
  -1 -14  -2  716.43   19.90
  -1 -14  -2  673.43   19.80
   1 -14   2  719.23   20.10
  -1  14  -2  714.63   19.20
  -1  14  -2  772.22   19.00
   1  14   2  744.43   19.30
   1  14   2  718.13   20.90
  -1  14  -2  765.22   22.20
  -2 -14  -2   15.60    2.30
   2 -14   2   16.80    2.40
  -2 -14  -2   20.30    2.90
   2  14   2   20.90    2.60
  -2  14  -2   20.70    1.60
  -2  14  -2   15.10    1.50
   2  14   2   17.60    1.60
  -2  14  -2   18.40    3.10
   3 -14   2   94.99    4.70
   3 -14   2   94.69    4.90
  -3 -14  -2   86.29    5.20
  -3 -14  -2   90.29    4.80
   3  14   2   93.39    3.50
  -3  14  -2   88.99    3.80
  -3  14  -2   85.39    3.70
   3  14   2   88.29    4.90
   4 -14   2  139.19    5.70
  -4 -14  -2  120.69    6.60
  -4 -14  -2  126.69    6.10
   4 -14   2  136.59    6.40
  -4  14  -2  128.59    5.20
   4  14   2  131.09    6.30
  -4  14  -2  134.49    5.20
   4  14   2  120.89    4.50
   5 -14   2   63.49    4.30
   5 -14   2   59.19    3.70
  -5 -14  -2   49.30    4.00
  -5 -14  -2   57.39    5.20
   5  14   2   61.19    4.70
  -5  14  -2   52.79    3.50
   5  14   2   58.19    4.70
  -6 -14  -2   55.09    6.00
   6 -14   2   57.89    4.50
   6  14   2   57.79    5.40
  -6  14  -2   64.69    4.10
   7 -14   2   46.70    4.40
  -7 -14  -2   50.39    6.10
   7  14   2   53.39    5.80
  -7  14  -2   47.80    3.80
  -8 -14  -2   17.70    4.70
   8 -14   2   31.40    4.30
  -8  14  -2   24.00    3.40
   8  14   2   25.60    4.60
   9 -14   2   -0.90    2.70
  -9 -14  -2   -0.10    4.00
  -9  14  -2    0.80    2.10
   9  14   2    2.80    3.30
 -10 -14  -2    7.60    5.00
  10 -14   2    9.00    3.70
 -10  14  -2    7.30    3.20
  10  14   2    5.10    3.90
 -11 -15   2    6.90    4.50
  11  15  -2   18.00    5.10
 -11  15   2    6.50    2.70
 -10 -15   2   -0.30    3.00
  10  15  -2    8.50    4.10
 -10  15   2    6.70    2.70
   9 -15  -2    2.70    2.60
  -9 -15   2    1.20    2.70
   9  15  -2   -2.50    3.20
   9  15  -2    1.20    2.70
  -9  15   2    0.70    1.70
   8 -15  -2   53.09    4.50
   8 -15  -2   45.80    4.80
  -8 -15   2   48.90    4.50
  -8  15   2   42.40    3.30
   8  15  -2   48.60    5.60
   8  15  -2   37.60    5.30
   7 -15  -2   47.90    4.30
  -7 -15   2   59.09    4.70
   7 -15  -2   58.99    4.30
  -7  15   2   61.59    3.90
   7  15  -2   58.89    5.70
   7  15  -2   50.79    5.80
   6 -15  -2   70.09    5.00
  -6 -15   2   78.39    4.50
   6 -15  -2   78.29    4.60
   6  15  -2   74.29    5.50
   6  15  -2   85.99    6.20
  -6  15   2   71.49    3.80
   5 -15  -2  169.68    6.80
   5 -15  -2  167.78    7.40
  -5 -15   2  176.88    6.70
   5  15  -2  169.98    8.20
   5  15  -2  166.78    7.80
  -5  15   2  164.78    6.00
  -4 -15   2   91.29    4.20
   4 -15  -2   88.89    4.60
   4 -15  -2   97.29    5.00
  -4  15   2   85.59    3.80
   4  15  -2   88.29    5.70
   4  15  -2  103.99    5.70
  -4  15   2   98.09    3.30
  -3 -15   2  186.28    6.40
   3 -15  -2  203.98    7.60
  -3  15   2  195.58    7.90
  -3  15   2  188.18    6.10
  -3  15   2  184.68    5.60
   3  15  -2  184.68    8.30
   3  15  -2  187.48    8.20
   2 -15  -2   25.00    1.90
  -2 -15   2   24.90    1.80
   2 -15  -2   27.50    3.00
   2  15  -2   29.80    3.40
  -2  15   2   22.20    2.90
  -2  15   2   23.80    1.80
   2  15  -2   22.10    3.10
   2  15  -2   26.00    1.30
   1 -15  -2    3.30    1.60
  -1 -15   2    3.50    0.80
  -1 -15   2    3.80    2.00
   1 -15  -2    0.10    1.10
   1  15  -2    3.60    0.80
  -1  15   2    5.30    1.70
   1  15  -2    4.80    2.20
  -1  15   2    3.10    0.90
   1  15  -2    5.10    2.00
   0 -15  -2  192.38    7.00
   0 -15  -2  198.88    7.50
   0 -15   2  189.18    7.60
   0 -15   2  195.48    5.60
   0  15   2  198.98    7.90
   0  15  -2  207.88    6.10
   0  15  -2  202.58    8.70
   0  15   2  203.88    6.30
  -1 -15  -2  172.48    6.90
   1 -15   2  165.78    4.90
   1 -15   2  167.78    7.00
  -1 -15  -2  175.88    7.00
  -1  15  -2  175.88    8.00
   1  15   2  180.28    7.30
  -1  15  -2  175.08    5.60
   1  15   2  178.28    5.60
   2 -15   2   78.09    4.70
  -2 -15  -2   83.39    4.80
  -2 -15  -2   70.39    4.50
  -2  15  -2   81.79    5.60
  -2  15  -2   73.99    3.20
  -2  15  -2   73.89    2.80
   2  15   2   79.49    3.10
   2  15   2   79.49    4.60
   3 -15   2  125.19    5.60
  -3 -15  -2  119.69    5.70
  -3 -15  -2  126.69    6.30
   3 -15   2  120.99    5.90
  -3  15  -2  125.69    4.80
  -3  15  -2  126.79    4.50
   3  15   2  121.69    4.40
  -3  15  -2  128.89    7.40
   3  15   2  127.29    6.20
  -4 -15  -2    1.90    2.20
   4 -15   2    1.90    1.50
   4 -15   2    3.00    1.80
  -4 -15  -2    4.10    2.00
  -4  15  -2    2.80    1.30
   4  15   2    4.40    2.00
   4  15   2    3.90    1.20
   5 -15   2  184.78    7.90
  -5 -15  -2  174.48    7.50
  -5 -15  -2  157.58    8.40
   5 -15   2  182.98    7.00
   5  15   2  175.08    8.20
  -5  15  -2  182.98    6.80
   6 -15   2   36.10    4.20
  -6 -15  -2   31.90    4.80
  -6  15  -2   31.20    3.30
   6  15   2   30.80    4.30
   7 -15   2   19.00    3.60
  -7 -15  -2   18.40    4.40
   7  15   2   16.40    3.60
  -7  15  -2   18.10    2.80
   8 -15   2   27.60    4.20
  -8 -15  -2   25.10    5.10
   8  15   2   31.30    4.90
  -8  15  -2   34.60    4.00
   9 -15   2   16.50    4.00
  -9 -15  -2   17.50    5.40
  -9  15  -2   19.80    3.50
   9  15   2   19.10    4.70
 -10 -15  -2   -3.00    4.30
  10 -15   2    2.50    3.10
  10  15   2    5.80    4.10
 -10  15  -2    1.20    2.70
 -11  16   2    6.70    2.80
  11  16  -2    2.90    3.80
 -10 -16   2   -2.90    3.30
 -10  16   2    1.30    2.10
  10  16  -2    0.40    3.20
   9 -16  -2   11.70    3.20
  -9 -16   2   14.00    4.00
   9  16  -2    5.40    4.00
  -9  16   2   14.80    2.90
   9  16  -2   11.20    3.80
   8 -16  -2    8.80    2.70
   8 -16  -2   13.90    3.20
  -8 -16   2   14.10    3.30
   8  16  -2    8.70    4.00
   8  16  -2   11.30    3.60
  -8  16   2   12.50    2.30
  -7 -16   2   10.10    2.80
   7 -16  -2   15.20    2.80
   7 -16  -2   10.90    2.70
   7  16  -2    9.40    3.70
   7  16  -2   15.50    3.40
  -7  16   2   14.80    2.40
   6 -16  -2  148.99    6.50
   6 -16  -2  140.69    7.10
  -6 -16   2  127.69    6.20
   6  16  -2  138.69    8.00
   6  16  -2  136.89    7.70
  -6  16   2  144.99    5.80
   5 -16  -2    8.40    2.40
  -5 -16   2    7.50    1.80
   5 -16  -2    5.00    1.60
   5  16  -2    9.20    2.70
  -5  16   2    7.60    1.50
   5  16  -2    8.30    2.80
  -4 -16   2   33.50    2.60
   4 -16  -2   39.70    3.70
   4 -16  -2   42.10    3.30
   4  16  -2   33.90    4.10
  -4  16   2   39.80    1.90
  -4  16   2   39.20    2.50
   4  16  -2   36.00    4.00
   3 -16  -2  135.39    6.10
  -3 -16   2  137.99    5.10
  -3  16   2  139.49    4.40
   3  16  -2  151.38    7.30
  -3  16   2  144.19    6.90
   3  16  -2  156.88    7.10
  -3  16   2  139.59    5.10
   2 -16  -2   13.80    1.50
   2 -16  -2   12.80    2.20
  -2 -16   2   14.80    1.50
   2  16  -2   13.30    2.90
  -2  16   2   16.70    2.70
  -2  16   2   11.70    1.40
   2  16  -2   14.20    2.70
   2  16  -2   13.30    1.10
  -1 -16   2   20.50    1.40
   1 -16  -2   19.00    2.60
  -1 -16   2   21.60    3.00
   1 -16  -2   18.30    2.00
   1  16  -2   24.80    3.30
  -1  16   2   21.10    1.70
  -1  16   2   21.50    2.80
   1  16  -2   21.00    1.40
   0 -16   2   60.39    2.30
   0 -16  -2   54.19    4.20
   0 -16  -2   60.59    3.70
   0 -16   2   57.69    4.20
   0  16   2   57.59    4.20
   0  16   2   63.19    2.90
   0  16  -2   66.09    2.70
   0  16  -2   68.69    4.80
  -1 -16  -2  169.88    6.90
  -1 -16  -2  171.98    7.10
   1 -16   2  177.08    7.50
   1 -16   2  173.48    4.90
   1  16   2  169.78    5.50
  -1  16  -2  168.28    5.50
  -1  16  -2  170.78    8.00
   1  16   2  182.18    7.40
  -2 -16  -2  174.58    7.60
   2 -16   2  181.98    7.30
  -2 -16  -2  177.68    7.50
  -2  16  -2  178.98    5.20
  -2  16  -2  172.88    5.90
   2  16   2  177.58    7.60
   2  16   2  189.68    5.70
  -2  16  -2  174.78    8.40
  -3 -16  -2   49.90    4.00
   3 -16   2   46.30    3.70
  -3 -16  -2   47.40    4.30
   3  16   2   49.10    2.40
   3  16   2   48.90    4.00
  -3  16  -2   50.09    4.90
  -3  16  -2   50.09    2.60
  -3  16  -2   48.00    2.80
  -4 -16  -2  229.88    9.80
   4 -16   2  245.68    8.70
  -4 -16  -2  248.28    9.40
   4 -16   2  251.97    9.50
  -4  16  -2  246.68    8.40
   4  16   2  269.57   10.20
  -5 -16  -2   36.70    3.90
   5 -16   2   45.00    3.50
  -5 -16  -2   49.60    5.40
   5 -16   2   35.90    3.70
  -5  16  -2   37.30    2.90
   5  16   2   44.60    4.40
   6 -16   2   11.30    2.80
  -6 -16  -2   11.10    3.90
   6  16   2   19.80    3.70
  -6  16  -2   11.50    2.30
  -7 -16  -2   80.49    7.50
   7 -16   2   93.49    6.10
   7  16   2   98.59    7.20
  -7  16  -2   94.59    5.30
  -8 -16  -2   -3.50    3.80
   8 -16   2   -2.40    2.00
  -8  16  -2    4.20    2.20
   8  16   2    1.60    2.80
   9 -16   2    9.20    3.40
  -9 -16  -2    2.10    4.20
  -9  16  -2    6.30    2.60
   9  16   2    6.20    3.60
  10 -16   2    4.20    3.30
 -10 -16  -2    3.90    4.70
 -10  16  -2    6.50    3.30
  10  16   2    1.10    4.20
 -11  17   2    6.30    2.70
  11  17  -2    1.50    4.30
 -10 -17   2   17.50    4.60
  10  17  -2   25.60    5.60
 -10  17   2   25.50    3.70
   9 -17  -2   19.90    3.90
  -9 -17   2   22.70    4.10
  -9  17   2   22.60    3.20
   9  17  -2   17.90    4.40
   9  17  -2   14.10    4.10
   8 -17  -2    4.00    2.50
  -8 -17   2    6.30    2.90
   8  17  -2    5.20    3.20
   8  17  -2    1.80    3.10
  -8  17   2    3.10    1.90
   7 -17  -2  232.68   10.00
   7 -17  -2  250.47    9.70
  -7 -17   2  253.97    9.80
  -7  17   2  244.58    8.70
   7  17  -2  243.88   11.00
   7  17  -2  236.98   11.40
   6 -17  -2    2.10    1.80
  -6 -17   2    4.50    2.00
   6 -17  -2    8.10    2.40
   6  17  -2    4.80    3.10
   6  17  -2    9.40    3.00
  -6  17   2    7.70    1.80
   5 -17  -2    2.30    1.80
   5 -17  -2    1.20    1.60
  -5 -17   2    2.50    1.50
   5  17  -2    0.00    2.10
  -5  17   2    1.20    1.20
   5  17  -2    0.30    2.70
   4 -17  -2  514.05   15.60
  -4 -17   2  522.75   14.80
   4 -17  -2  487.65   15.70
  -4  17   2  515.35   14.40
   4  17  -2  501.95   17.00
  -4  17   2  516.95   17.10
   4  17  -2  520.55   17.00
   3 -17  -2  121.69    5.90
  -3 -17   2  110.79    4.60
  -3  17   2  104.69    3.60
  -3  17   2  118.49    4.40
   3  17  -2  113.79    6.40
   3  17  -2  108.19    6.40
  -3  17   2  108.59    6.00
  -2 -17   2   62.89    2.90
   2 -17  -2   62.79    4.20
   2 -17  -2   59.69    2.80
   2  17  -2   69.79    2.40
  -2  17   2   60.89    4.40
  -2  17   2   61.69    3.00
   2  17  -2   65.99    5.10
   2  17  -2   70.39    4.90
   1 -17  -2  124.19    6.20
   1 -17  -2  123.59    4.90
  -1 -17   2  131.69    4.30
  -1 -17   2  132.09    6.30
   1  17  -2  128.29    6.90
  -1  17   2  136.09    4.80
   1  17  -2  141.39    4.40
  -1  17   2  147.39    6.70
   0 -17   2  122.89    3.90
   0 -17   2  127.99    6.20
   0 -17  -2  126.39    6.10
   0 -17  -2  120.59    5.30
   0  17  -2  137.19    4.50
   0  17   2  134.49    4.70
   0  17   2  133.79    6.40
   0  17  -2  136.49    7.00
   1 -17   2   98.39    3.00
  -1 -17  -2   82.39    5.20
  -1 -17  -2   93.99    5.10
   1 -17   2   96.99    5.60
  -1  17  -2   93.89    6.00
  -1  17  -2   95.39    3.70
   1  17   2   91.59    5.30
   1  17   2   97.69    3.60
  -2 -17  -2  305.67   11.00
   2 -17   2  306.07   10.90
  -2 -17  -2  299.47   10.80
   2  17   2  315.57    8.80
  -2  17  -2  307.17    9.20
   2  17   2  289.27   10.90
  -2  17  -2  318.97   12.40
   3 -17   2   93.79    5.10
  -3 -17  -2   91.59    5.30
  -3 -17  -2   89.29    5.40
  -3  17  -2   94.29    4.00
  -3  17  -2   86.79    6.50
   3  17   2   86.29    5.30
   3  17   2   90.99    3.50
   4 -17   2  112.59    5.40
  -4 -17  -2  102.39    6.30
   4 -17   2  117.39    6.10
  -4 -17  -2  103.79    5.90
   4  17   2  106.29    6.20
  -4  17  -2   97.79    4.50
  -5 -17  -2   13.90    2.90
   5 -17   2   19.30    3.20
  -5 -17  -2   17.80    3.80
   5 -17   2   21.30    2.80
   5  17   2   14.90    3.20
  -5  17  -2   16.40    2.20
  -6 -17  -2   13.40    3.90
   6 -17   2    5.40    2.40
   6  17   2   14.80    3.40
  -6  17  -2   14.40    2.50
  -7 -17  -2    8.80    3.80
   7 -17   2    9.20    3.10
  -7  17  -2    7.80    2.20
   7  17   2    6.30    3.10
   8 -17   2   -0.20    2.50
  -8 -17  -2    2.90    3.70
   8  17   2   -3.00    2.90
  -8  17  -2    0.40    1.80
  -9 -17  -2   49.60    7.70
   9 -17   2   55.89    5.60
  -9  17  -2   60.39    5.10
   9  17   2   58.99    7.10
 -10 -17  -2   -2.80    4.20
  10 -17   2    0.00    3.00
  10  17   2    5.40    4.40
 -10  17  -2    3.50    2.60
  11  18  -2    2.80    3.80
 -11  18   2    3.50    2.90
 -10 -18   2    2.40    3.50
 -10  18   2    6.70    2.70
  10  18  -2    2.50    3.80
  -9 -18   2   -2.30    2.60
   9 -18  -2    1.90    2.30
  -9  18   2    1.20    1.90
   9  18  -2    2.40    3.80
   9  18  -2    4.20    3.60
  -8 -18   2   40.40    4.80
   8 -18  -2   42.30    5.00
  -8  18   2   45.60    3.50
   8  18  -2   33.60    5.10
   8  18  -2   35.20    5.60
  -7 -18   2    2.20    2.20
   7 -18  -2    1.50    2.10
   7 -18  -2    2.00    2.40
   7  18  -2    0.40    2.50
  -7  18   2    3.90    1.70
   7  18  -2    3.00    3.00
   6 -18  -2   37.10    3.80
   6 -18  -2   34.40    3.60
  -6 -18   2   29.40    3.20
  -6  18   2   27.60    2.60
   6  18  -2   29.90    4.60
   6  18  -2   26.70    4.20
   5 -18  -2    2.60    2.00
   5 -18  -2    4.10    1.90
  -5 -18   2    3.40    1.60
   5  18  -2    5.30    2.60
  -5  18   2    1.70    1.50
   5  18  -2    1.10    2.90
  -4 -18   2   20.30    2.20
   4 -18  -2   20.20    3.10
  -4  18   2   23.00    3.60
   4  18  -2   17.40    3.30
   4  18  -2   25.10    4.00
  -4  18   2   18.60    2.10
   3 -18  -2   71.19    4.60
  -3 -18   2   64.29    3.20
  -3  18   2   72.89    3.40
   3  18  -2   72.09    5.50
  -3  18   2   64.69    5.00
   3  18  -2   64.09    4.90
   2 -18  -2   36.90    2.20
  -2 -18   2   38.70    2.30
   2 -18  -2   38.10    3.70
  -2  18   2   37.10    2.30
  -2  18   2   39.20    3.90
   2  18  -2   41.50    1.80
   2  18  -2   44.10    4.40
   2  18  -2   47.00    4.20
   1 -18  -2    9.60    1.70
  -1 -18   2    5.80    2.20
  -1 -18   2    9.10    1.20
   1 -18  -2    9.20    2.30
   1  18  -2   12.00    1.20
  -1  18   2    9.20    2.40
  -1  18   2    8.10    1.20
   1  18  -2   11.60    2.80
   0 -18   2   71.29    5.00
   0 -18  -2   81.39    4.30
   0 -18   2   82.09    2.80
   0 -18  -2   80.99    4.90
   0  18  -2   89.09    3.40
   0  18   2   87.59    3.50
   0  18   2   90.69    5.30
   0  18  -2   84.59    5.60
   1 -18   2  224.48    6.00
  -1 -18  -2  219.88    8.70
  -1 -18  -2  221.68    8.40
   1 -18   2  216.68    8.80
   1  18   2  228.18    7.00
   1  18   2  231.28    9.20
  -1  18  -2  232.48    7.20
  -1  18  -2  241.18   10.30
  -2 -18  -2  110.39    5.90
   2 -18   2  115.39    5.90
  -2 -18  -2  111.69    5.80
  -2  18  -2  119.39    7.20
  -2  18  -2  115.79    4.60
   2  18   2  128.69    6.40
   2  18   2  124.49    4.30
  -3 -18  -2   35.70    3.80
  -3 -18  -2   36.40    4.00
  -3  18  -2   33.20    2.40
  -3  18  -2   42.30    5.00
   3  18   2   38.50    3.80
   3  18   2   29.90    2.00
  -4 -18  -2  130.09    6.80
   4 -18   2  128.99    6.80
   4 -18   2  129.49    6.00
  -4 -18  -2  119.39    6.90
  -4  18  -2  124.29    5.20
   4  18   2  126.69    6.90
   5 -18   2    8.50    2.30
   5 -18   2    7.90    2.50
  -5 -18  -2   13.10    3.50
  -5 -18  -2   10.40    2.90
  -5  18  -2    9.20    2.10
   5  18   2    7.30    2.90
   6 -18   2  217.48    9.60
  -6 -18  -2  208.98   10.50
   6  18   2  234.88   10.50
  -6  18  -2  216.68    8.40
  -7 -18  -2   35.60    5.60
   7 -18   2   47.80    4.70
   7  18   2   39.80    5.30
  -7  18  -2   36.00    3.70
   8 -18   2   -0.90    2.50
  -8 -18  -2   -0.20    4.00
  -8  18  -2    1.70    2.30
   8  18   2    5.40    3.60
   9 -18   2   28.70    4.60
  -9 -18  -2   32.10    6.30
  -9  18  -2   31.10    4.40
   9  18   2   35.90    5.90
  10 -18   2   -0.90    3.00
 -10 -18  -2    8.40    5.40
  10  18   2   -0.70    3.50
 -10  18  -2    2.20    2.50
 -10 -19   2   -1.70    3.30
  10  19  -2    2.80    3.70
 -10  19   2   -3.60    2.00
  -9 -19   2    4.60    3.20
   9 -19  -2    4.50    3.00
  -9  19   2    5.30    2.20
   9  19  -2    8.10    3.90
   9  19  -2   -0.60    3.70
   8 -19  -2    9.30    2.90
  -8 -19   2   11.30    3.10
   8  19  -2    9.20    3.60
  -8  19   2   10.50    2.30
   8  19  -2    6.20    3.60
  -7 -19   2   32.10    3.90
   7 -19  -2   37.00    4.40
   7 -19  -2   37.10    4.20
  -7  19   2   32.20    3.00
   7  19  -2   34.00    5.30
   7  19  -2   39.10    5.20
   6 -19  -2    4.70    2.10
   6 -19  -2    0.70    1.90
  -6 -19   2    2.70    1.90
   6  19  -2    5.00    3.40
  -6  19   2    1.60    1.50
   6  19  -2    0.50    2.50
   5 -19  -2   10.30    2.60
   5 -19  -2   10.50    2.40
  -5 -19   2   11.60    2.30
   5  19  -2    4.10    3.40
  -5  19   2    8.20    1.70
   5  19  -2   15.60    3.40
  -4 -19   2    7.30    1.70
   4 -19  -2    8.40    2.30
   4  19  -2    7.50    3.10
  -4  19   2    8.40    1.60
   4  19  -2   11.80    3.00
  -4  19   2    7.80    2.50
   3 -19  -2   11.50    2.50
  -3 -19   2   15.20    1.90
  -3  19   2   17.60    3.20
   3  19  -2   15.60    3.10
   3  19  -2   15.60    3.50
  -3  19   2   14.40    1.70
  -2 -19   2   14.60    1.60
  -2 -19   2   15.10    3.00
   2 -19  -2    9.70    2.30
   2 -19  -2   14.10    1.50
  -2  19   2   15.80    2.90
   2  19  -2   14.20    3.10
   2  19  -2   12.60    1.10
   2  19  -2   13.90    2.90
  -2  19   2   16.50    1.70
   1 -19  -2  170.68    7.50
  -1 -19   2  174.08    7.80
   1 -19  -2  165.48    6.10
  -1 -19   2  165.38    5.30
  -1  19   2  176.18    8.00
  -1  19   2  171.98    5.80
   1  19  -2  185.28    5.50
   1  19  -2  183.78    8.70
   0 -19  -2  226.78    8.20
   0 -19   2  232.58    9.40
   0 -19   2  234.88    6.50
   0 -19  -2  217.38    9.20
   0  19  -2  253.47   10.50
   0  19   2  250.57    7.70
   0  19   2  252.17   10.00
   0  19  -2  255.87    7.50
   1 -19   2   45.20    1.70
   1 -19   2   41.30    4.40
  -1 -19  -2   50.19    4.20
  -1 -19  -2   49.10    3.80
   1  19   2   53.19    2.60
  -1  19  -2   37.60    4.50
   1  19   2   47.40    4.10
  -1  19  -2   50.89    2.70
  -2 -19  -2   41.00    3.80
  -2 -19  -2   42.60    4.40
   2 -19   2   46.10    4.30
  -2  19  -2   36.80    2.50
   2  19   2   44.10    4.10
  -2  19  -2   41.60    4.90
   2  19   2   42.00    2.20
  -3 -19  -2   17.60    3.20
   3 -19   2   12.20    2.50
  -3 -19  -2   16.30    3.10
   3  19   2   13.20    2.90
   3  19   2   16.30    1.50
  -3  19  -2   14.60    1.90
  -3  19  -2   21.10    3.90
  -4 -19  -2   22.00    3.80
   4 -19   2   21.00    3.00
   4 -19   2   23.30    3.40
  -4 -19  -2   21.10    3.40
   4  19   2   16.20    3.30
  -4  19  -2   21.50    2.30
  -5 -19  -2   58.09    5.70
  -5 -19  -2   62.89    5.30
   5 -19   2   73.39    5.50
   5 -19   2   75.19    4.80
   5  19   2   79.99    6.00
  -5  19  -2   65.99    4.00
   6 -19   2   39.60    4.70
   6 -19   2   32.10    3.80
  -6 -19  -2   27.50    4.90
  -6  19  -2   27.40    3.20
   6  19   2   43.60    5.30
   7 -19   2   17.60    3.60
  -7 -19  -2   12.20    4.30
   7  19   2   23.30    4.70
  -7  19  -2   16.20    2.90
  -8 -19  -2   58.99    7.40
   8 -19   2   76.19    6.40
  -8  19  -2   68.29    5.20
   8  19   2   73.19    7.40
  -9 -19  -2   -1.00    4.60
   9 -19   2    6.50    3.20
  -9  19  -2    5.00    2.50
   9  19   2    3.80    3.70
  10 -19   2   30.60    5.20
 -10 -19  -2   29.40    7.40
  10  19   2   20.90    5.50
 -10  19  -2   38.60    5.20
 -10 -20   2   -3.00    3.70
 -10  20   2   -0.90    2.00
  10  20  -2    9.50    4.40
   9 -20  -2    4.60    3.10
  -9 -20   2   -1.00    2.80
   9  20  -2    7.00    3.90
   9  20  -2    6.50    3.50
  -9  20   2    4.80    2.10
  -8 -20   2    2.60    2.70
   8 -20  -2    2.20    2.40
   8  20  -2    2.00    3.70
  -8  20   2    1.90    1.80
   8  20  -2    2.90    3.10
   7 -20  -2    6.10    2.60
  -7 -20   2   13.70    3.20
   7 -20  -2    7.10    2.60
  -7  20   2    7.70    2.00
   7  20  -2   20.20    4.30
   7  20  -2   11.10    3.70
   6 -20  -2   33.30    3.90
  -6 -20   2   29.80    3.50
   6 -20  -2   33.10    4.20
   6  20  -2   32.10    5.00
   6  20  -2   28.50    4.50
  -6  20   2   28.50    2.90
   5 -20  -2   87.49    5.60
  -5 -20   2   78.49    4.60
   5 -20  -2   86.69    5.40
   5  20  -2   77.69    6.40
  -5  20   2   83.29    4.10
   5  20  -2   81.49    6.60
  -4 -20   2   24.80    2.40
   4 -20  -2   29.60    3.60
   4  20  -2   25.70    4.00
  -4  20   2   28.80    4.30
   4  20  -2   21.10    4.10
  -4  20   2   29.20    2.50
  -3 -20   2  104.79    4.60
   3 -20  -2  118.29    6.10
   3  20  -2  115.39    7.10
  -3  20   2  114.59    6.80
  -3  20   2  108.39    4.40
   3  20  -2  112.69    6.90
  -2 -20   2   60.59    3.00
   2 -20  -2   58.19    4.40
  -2 -20   2   59.59    4.80
   2  20  -2   63.29    2.50
   2  20  -2   66.49    5.20
  -2  20   2   68.19    5.10
  -2  20   2   63.69    3.10
   1 -20  -2    1.40    1.20
  -1 -20   2    2.70    2.10
  -1 -20   2    2.10    0.90
   1 -20  -2    3.00    2.00
  -1  20   2    6.50    2.20
  -1  20   2    2.50    1.10
   1  20  -2    3.00    0.90
   1  20  -2    7.80    2.70
   0 -20  -2    7.60    1.90
   0 -20   2   10.20    2.70
   0 -20  -2    4.60    2.10
   0 -20   2    9.00    1.00
   0  20   2    6.40    1.20
   0  20  -2   12.00    3.00
   0  20  -2    9.20    1.30
   0  20   2   10.00    2.60
   1 -20   2  157.68    7.60
  -1 -20  -2  150.98    6.90
  -1 -20  -2  162.78    7.70
  -1  20  -2  159.98    5.50
   1  20   2  162.88    5.40
   1  20   2  153.38    7.60
  -1  20  -2  172.98    8.70
  -2 -20  -2  203.68    8.50
  -2 -20  -2  175.88    8.00
   2 -20   2  195.78    8.80
  -2  20  -2  204.88    7.00
   2  20   2  225.68    9.50
   2  20   2  211.88    6.50
  -2  20  -2  212.58   10.30
   3 -20   2   22.20    3.30
  -3 -20  -2   15.80    3.10
  -3 -20  -2   24.10    3.70
  -3  20  -2   24.10    2.20
   3  20   2   23.50    3.50
  -3  20  -2   18.50    4.10
   4 -20   2   34.00    3.40
  -4 -20  -2   33.30    4.70
  -4 -20  -2   34.50    4.00
   4 -20   2   32.40    4.00
  -4  20  -2   31.90    2.80
   4  20   2   34.90    4.30
   5 -20   2   39.70    4.00
  -5 -20  -2   38.30    5.40
  -5 -20  -2   41.70    4.70
   5 -20   2   44.30    5.00
   5  20   2   45.20    5.30
  -5  20  -2   35.70    3.10
   6 -20   2   62.79    5.30
   6 -20   2   61.29    4.80
  -6 -20  -2   52.59    6.20
   6  20   2   59.29    5.90
  -6  20  -2   62.39    4.20
  -7 -20  -2    7.90    4.00
   7 -20   2   10.80    3.30
   7  20   2    4.30    3.20
  -7  20  -2    8.90    2.40
   8 -20   2    9.00    3.50
  -8 -20  -2    8.90    4.40
   8  20   2   10.30    4.20
  -8  20  -2    3.30    2.50
  -9 -20  -2    0.80    4.20
   9 -20   2    1.20    2.80
  -9  20  -2    4.30    2.90
   9  20   2    6.20    4.30
  10 -20   2   20.10    5.20
 -10  20  -2   27.80    4.40
  10  20   2   34.60    6.70
 -10 -21   2    6.70    4.60
 -10  21   2    5.50    2.60
  10  21  -2    8.00    4.20
   9 -21  -2    7.70    3.40
  -9 -21   2    2.30    3.30
  -9  21   2   11.50    2.70
   9  21  -2    6.80    3.90
   9  21  -2    2.70    4.10
  -8 -21   2   17.50    3.80
   8 -21  -2   17.10    3.90
   8  21  -2    9.30    3.70
  -8  21   2   16.60    2.80
   8  21  -2   17.30    4.80
   7 -21  -2   47.70    4.40
   7 -21  -2   49.20    4.80
  -7 -21   2   51.29    4.70
   7  21  -2   41.00    6.00
   7  21  -2   40.40    5.50
  -7  21   2   45.00    3.40
   6 -21  -2   48.90    4.20
   6 -21  -2   50.79    5.00
  -6 -21   2   39.60    3.80
  -6  21   2   53.39    3.60
   6  21  -2   44.80    5.50
   6  21  -2   45.40    5.70
   5 -21  -2    1.30    2.10
  -5 -21   2    5.30    1.90
   5 -21  -2    0.90    2.00
   5  21  -2    3.40    3.10
  -5  21   2   -0.40    1.40
   5  21  -2    5.00    3.00
   4 -21  -2    1.80    2.30
  -4 -21   2    5.60    1.80
  -4  21   2    5.10    1.50
   4  21  -2    3.40    3.20
   4  21  -2    4.90    2.80
  -4  21   2    3.70    2.80
  -3 -21   2   12.30    1.70
   3 -21  -2    9.40    2.50
  -3  21   2   14.00    3.30
   3  21  -2   12.20    3.60
  -3  21   2   13.60    1.80
   3  21  -2   15.50    3.20
  -2 -21   2   83.49    3.60
  -2 -21   2   84.99    5.80
   2 -21  -2   84.59    5.30
   2  21  -2   83.59    6.00
  -2  21   2   90.09    3.80
  -2  21   2   85.69    5.70
   1 -21  -2  193.98    8.70
  -1 -21   2  213.08    6.40
   1 -21  -2  198.58    7.10
  -1 -21   2  217.58    9.40
   1  21  -2  223.68    6.70
  -1  21   2  236.58    9.90
   1  21  -2  214.98    9.90
  -1  21   2  217.78    7.00
   0 -21   2   17.50    1.30
   0 -21  -2   18.20    2.50
   0 -21   2   22.00    3.50
   0 -21  -2   23.00    3.40
   0  21  -2   24.00    3.90
   0  21   2   18.80    3.40
   0  21  -2   23.00    1.70
   0  21   2   20.40    1.80
  -1 -21  -2  105.59    6.60
   1 -21   2  120.99    6.90
  -1 -21  -2  112.69    5.90
   1  21   2  115.59    6.60
  -1  21  -2  121.09    4.60
   1  21   2  119.09    4.40
  -1  21  -2  114.99    7.30
   2 -21   2    7.50    2.40
  -2 -21  -2    5.10    2.20
  -2 -21  -2    5.90    2.60
   2  21   2    2.50    2.10
   2  21   2    5.20    1.20
  -2  21  -2    7.60    1.40
  -2  21  -2    6.30    2.80
   3 -21   2   15.00    2.90
  -3 -21  -2   12.40    3.00
  -3 -21  -2   14.20    3.40
   3  21   2   13.00    3.10
  -3  21  -2   12.70    3.70
  -3  21  -2   15.70    2.00
  -4 -21  -2  210.68    9.70
   4 -21   2  212.88    9.10
  -4 -21  -2  221.38   10.20
   4 -21   2  215.88    9.70
   4  21   2  224.88   10.30
  -4  21  -2  222.28    7.90
  -5 -21  -2   20.00    3.70
  -5 -21  -2   19.30    4.60
   5 -21   2   18.30    3.20
   5 -21   2   20.60    3.80
   5  21   2   18.10    3.90
  -5  21  -2   21.80    2.70
  -6 -21  -2   15.10    4.20
   6 -21   2    8.10    2.90
   6 -21   2   11.20    2.80
   6  21   2   12.90    3.60
  -6  21  -2   13.70    2.50
   7 -21   2   21.00    3.90
  -7 -21  -2   23.50    5.10
   7  21   2   25.70    4.80
  -7  21  -2   17.50    3.00
  -8 -21  -2   -4.20    3.50
   8 -21   2    0.80    2.90
  -8  21  -2    3.10    2.30
   8  21   2    2.50    3.60
  -9 -21  -2   89.69    9.70
   9 -21   2  118.99    8.50
  -9  21  -2  113.19    7.10
   9  21   2  133.29   10.40
  10 -21   2    5.70    4.00
 -10  21  -2    4.90    3.10
 -10 -22   2   -1.60    4.10
  10  22  -2    9.70    4.90
 -10  22   2    3.80    2.50
  -9 -22   2    0.80    3.10
   9 -22  -2   -0.60    2.70
   9  22  -2    3.00    3.80
   9  22  -2   -4.80    3.70
  -9  22   2    1.50    2.00
  -8 -22   2    4.70    3.00
   8 -22  -2    4.00    2.90
   8  22  -2    6.20    3.80
  -8  22   2    4.80    2.00
   8  22  -2    1.30    3.40
   7 -22  -2    7.50    2.80
   7 -22  -2    9.10    2.80
  -7 -22   2   10.00    2.90
   7  22  -2    9.00    3.60
   7  22  -2   10.90    4.00
  -7  22   2   11.60    2.30
   6 -22  -2   31.70    4.40
   6 -22  -2   27.60    3.80
  -6 -22   2   31.60    3.90
   6  22  -2   18.00    4.60
   6  22  -2   31.50    5.00
  -6  22   2   35.30    3.20
   5 -22  -2   20.80    3.40
   5 -22  -2   20.70    3.40
  -5 -22   2   21.60    2.90
  -5  22   2   23.10    2.60
   5  22  -2   21.90    4.20
   5  22  -2   24.20    4.50
   4 -22  -2   58.59    4.80
  -4 -22   2   64.39    3.90
  -4  22   2   68.89    6.10
   4  22  -2   67.69    6.30
  -4  22   2   70.29    3.70
   4  22  -2   59.49    5.90
  -3 -22   2    9.50    1.80
   3 -22  -2   11.90    2.80
  -3 -22   2    8.30    3.00
  -3  22   2   11.80    1.70
   3  22  -2   11.20    3.80
  -3  22   2   10.50    3.10
   3  22  -2   10.40    3.10
   2 -22  -2   17.40    3.10
  -2 -22   2   15.70    1.70
  -2 -22   2   13.00    3.10
  -2  22   2   19.80    2.00
  -2  22   2   17.40    3.20
   2  22  -2   22.70    3.80
  -1 -22   2   73.59    5.60
   1 -22  -2   79.99    5.40
  -1 -22   2   73.79    3.10
  -1  22   2   76.39    5.60
  -1  22   2   78.09    3.50
   1  22  -2   77.49    3.20
   1  22  -2   76.49    5.90
   0 -22   2  211.48    6.10
   0 -22   2  199.68    9.60
   0 -22  -2  210.98    9.10
   0 -22  -2  203.48    7.90
   0  22   2  210.88    6.80
   0  22  -2  205.28   10.10
   0  22   2  226.18    9.80
   0  22  -2  221.98    6.90
  -1 -22  -2   55.59    4.80
  -1 -22  -2   57.59    4.30
   1 -22   2   55.49    5.00
   1  22   2   54.99    2.70
  -1  22  -2   59.59    3.00
  -1  22  -2   50.99    5.20
   1  22   2   50.19    4.60
  -2 -22  -2    8.00    2.90
   2 -22   2   18.40    3.50
  -2 -22  -2    6.90    2.60
  -2  22  -2   11.10    1.60
   2  22   2   14.20    1.50
  -2  22  -2   10.10    3.20
   2  22   2   12.10    3.00
  -3 -22  -2   72.39    5.50
   3 -22   2   71.99    5.50
  -3 -22  -2   65.09    5.20
  -3  22  -2   74.19    6.70
  -3  22  -2   74.89    3.80
  -4 -22  -2   72.79    5.90
   4 -22   2   71.09    5.70
   4 -22   2   61.79    5.10
  -4 -22  -2   62.69    6.00
  -4  22  -2   66.39    3.90
   4  22   2   71.49    5.90
   5 -22   2   28.60    3.80
  -5 -22  -2   33.00    4.50
  -5 -22  -2   37.10    5.40
   5 -22   2   36.20    4.70
   5  22   2   40.90    5.40
  -5  22  -2   33.60    3.10
   6 -22   2  135.99    7.90
   6 -22   2  138.69    7.40
  -6 -22  -2  120.19    8.50
  -6  22  -2  137.89    6.50
   6  22   2  149.19    8.80
   7 -22   2   30.80    4.50
  -7 -22  -2   25.30    5.70
   7  22   2   22.90    4.70
  -7  22  -2   23.60    3.50
   8 -22   2    7.40    3.40
  -8 -22  -2    6.10    4.50
   8  22   2    4.60    4.00
  -8  22  -2    6.30    2.80
  -9 -22  -2   10.40    5.30
   9 -22   2   17.60    4.60
  -9  22  -2    7.30    3.30
   9  22   2   10.60    4.60
  10 -22   2    2.50    3.30
 -10 -23   2    1.00    4.50
 -10  23   2   -0.30    2.30
  10  23  -2    0.90    4.00
   9 -23  -2    7.80    3.60
  -9 -23   2   -0.50    3.10
   9  23  -2    3.10    3.80
   9  23  -2    2.80    4.40
  -9  23   2   -1.40    2.10
   8 -23  -2   14.40    3.70
  -8 -23   2    9.20    3.50
   8  23  -2    7.10    4.40
   8  23  -2   19.10    4.80
  -8  23   2   14.90    2.60
  -7 -23   2    7.70    2.80
   7 -23  -2    5.00    2.70
   7 -23  -2    6.50    2.80
   7  23  -2    5.60    3.40
  -7  23   2   11.50    2.40
   7  23  -2   13.10    4.20
  -6 -23   2   13.90    2.80
   6 -23  -2   12.00    3.10
   6 -23  -2   15.00    3.20
  -6  23   2   13.90    2.30
   6  23  -2   15.60    4.60
   6  23  -2   13.70    3.90
  -5 -23   2   38.90    3.50
   5 -23  -2   37.30    4.40
   5 -23  -2   41.00    4.70
  -5  23   2   37.60    3.20
   5  23  -2   37.40    5.20
   5  23  -2   48.00    6.10
  -4 -23   2    2.10    1.50
   4 -23  -2    2.90    2.30
  -4  23   2    2.40    1.40
   4  23  -2    2.50    2.70
  -4  23   2    2.70    2.90
   4  23  -2    6.20    3.50
  -3 -23   2   -0.70    2.30
   3 -23  -2    3.40    2.30
  -3 -23   2    2.20    1.40
  -3  23   2    0.30    1.10
   3  23  -2    3.20    2.80
  -3  23   2   -1.00    2.30
  -2 -23   2    0.30    2.40
  -2 -23   2    3.90    1.20
   2 -23  -2    3.90    2.20
   2  23  -2   -0.70    2.20
  -2  23   2   -0.30    2.00
  -2  23   2    2.70    1.20
   1 -23  -2   33.50    4.10
  -1 -23   2   29.10    4.30
  -1 -23   2   30.80    2.00
  -1  23   2   28.90    4.20
  -1  23   2   31.30    2.20
   1  23  -2   31.10    4.40
   1  23  -2   34.80    2.10
   0 -23   2  211.48    9.90
   0 -23  -2  214.68    8.10
   0 -23  -2  216.38    9.70
   0  23  -2  240.78    7.40
   0  23   2  242.18   10.60
   0  23  -2  228.78   10.80
   0  23   2  229.18    7.40
  -1 -23  -2   11.30    2.70
   1 -23   2   13.20    3.50
  -1 -23  -2    8.90    2.90
  -1  23  -2    8.20    3.10
   1  23   2   14.60    1.60
   1  23   2   20.00    3.70
  -1  23  -2   16.10    1.90
  -2 -23  -2   13.00    3.10
   2 -23   2   11.00    3.00
  -2 -23  -2   12.60    3.10
  -2  23  -2   13.40    3.60
  -2  23  -2    6.80    1.40
   2  23   2    5.40    2.80
   2  23   2   10.80    1.40
  -3 -23  -2   19.30    3.70
   3 -23   2   12.30    2.90
  -3 -23  -2   13.80    3.50
  -3  23  -2   13.80    4.00
  -3  23  -2   14.70    2.00
   3  23   2   27.10    4.40
   4 -23   2  128.49    6.90
  -4 -23  -2  125.19    7.70
  -4 -23  -2  122.19    7.60
   4 -23   2  134.89    7.60
  -4  23  -2  129.59    9.20
  -4  23  -2  119.59    5.40
   4  23   2  122.39    7.90
  -5 -23  -2   57.19    6.60
  -5 -23  -2   56.79    5.70
   5 -23   2   54.59    4.80
   5 -23   2   60.29    5.40
   5  23   2   69.29    6.20
  -5  23  -2   64.39    4.20
   6 -23   2   48.30    5.60
  -6 -23  -2   38.90    5.70
   6 -23   2   43.30    4.50
  -6  23  -2   39.10    3.60
   6  23   2   23.80    4.60
   7 -23   2    2.20    2.60
  -7 -23  -2    2.30    3.70
  -7  23  -2    3.90    2.10
   7  23   2    1.80    3.00
  -8 -23  -2   16.20    5.30
   8 -23   2   16.80    4.00
   8  23   2   17.70    5.10
  -8  23  -2   17.20    3.30
  -9 -23  -2   -0.90    4.60
   9 -23   2    1.10    3.00
   9  23   2    7.60    4.50
  -9  23  -2    3.20    2.60
  10  24  -2   26.60    6.20
  -9 -24   2    6.70    4.20
   9 -24  -2    7.20    3.60
   9  24  -2    5.70    4.50
   9  24  -2   16.40    5.50
  -9  24   2    9.50    2.60
  -8 -24   2    0.90    2.80
   8 -24  -2    0.80    2.40
   8  24  -2    0.60    3.90
  -8  24   2    2.00    2.10
   8  24  -2    6.30    3.50
  -7 -24   2    5.20    2.70
   7 -24  -2    9.30    3.40
   7  24  -2    4.70    3.80
  -7  24   2    4.90    1.90
   7  24  -2    7.20    4.20
   6 -24  -2    4.70    2.60
   6 -24  -2    0.40    2.30
  -6 -24   2    0.20    2.10
   6  24  -2    4.10    3.40
   6  24  -2   -3.50    3.00
  -6  24   2    3.10    1.70
  -5 -24   2   65.19    4.50
   5 -24  -2   67.79    5.50
   5 -24  -2   68.79    5.50
  -5  24   2   65.29    4.10
   5  24  -2   62.59    6.80
   5  24  -2   74.49    7.00
  -4 -24   2   44.90    3.40
   4 -24  -2   47.40    4.70
  -4  24   2   54.29    3.50
  -4  24   2   40.50    5.60
   4  24  -2   47.80    6.00
   4  24  -2   58.19    6.40
  -3 -24   2   53.19    5.40
  -3 -24   2   62.09    3.60
   3 -24  -2   49.30    5.00
  -3  24   2   69.09    6.00
  -3  24   2   55.59    3.30
   3  24  -2   60.79    5.70
   2 -24  -2    0.70    2.10
  -2 -24   2    3.60    1.20
  -2 -24   2    0.60    2.60
  -2  24   2    2.20    1.20
   2  24  -2    3.60    2.70
  -2  24   2    3.60    2.50
   1 -24  -2   20.20    3.60
  -1 -24   2   33.90    2.10
  -1 -24   2   29.80    4.30
   1  24  -2   31.00    2.00
  -1  24   2   39.30    4.80
  -1  24   2   26.60    2.30
   1  24  -2   28.50    4.30
   0 -24  -2   29.00    3.20
   0 -24  -2   21.20    3.90
   0 -24   2   23.80    4.10
   0  24   2   27.30    4.30
   0  24   2   30.80    2.20
   0  24  -2   31.50    2.20
   0  24  -2   19.00    3.90
   1 -24   2    8.80    3.10
  -1 -24  -2   13.20    3.30
  -1 -24  -2   11.80    2.80
   1  24   2   15.20    3.30
  -1  24  -2   11.60    1.70
  -1  24  -2   12.90    3.60
   1  24   2   15.70    1.70
  -2 -24  -2    6.30    2.80
  -2 -24  -2    2.50    2.60
   2 -24   2    2.10    2.90
   2  24   2    3.20    2.80
  -2  24  -2    0.60    1.10
   2  24   2    4.40    1.10
  -2  24  -2    4.60    2.90
  -3 -24  -2    9.00    3.40
  -3 -24  -2   11.30    3.50
   3 -24   2   11.80    3.10
  -3  24  -2   12.30    2.00
  -3  24  -2   18.60    4.30
   3  24   2   10.90    3.40
  -4 -24  -2    4.90    3.20
   4 -24   2    9.40    3.20
  -4 -24  -2    8.60    3.50
   4 -24   2    7.10    2.60
   4  24   2    5.60    3.00
  -4  24  -2    5.60    1.80
  -4  24  -2    6.20    3.70
   5 -24   2   10.50    2.80
  -5 -24  -2   11.60    3.70
   5 -24   2   12.10    3.40
  -5 -24  -2   15.40    4.40
   5  24   2   14.70    3.80
  -5  24  -2   11.80    2.30
   6 -24   2   30.00    3.90
   6 -24   2   27.80    4.40
  -6 -24  -2   18.20    4.60
   6  24   2   31.90    5.10
  -6  24  -2   29.00    3.60
   7 -24   2    2.80    3.10
  -7 -24  -2   -2.90    3.40
  -7  24  -2    7.70    2.50
   7  24   2    3.30    3.30
  -8 -24  -2    3.10    4.80
   8 -24   2    1.00    3.00
   8  24   2    0.30    3.30
  -8  24  -2    7.60    2.70
   9 -24   2    8.70    4.00
  -9 -24  -2    0.00    4.30
  -9  24  -2    2.90    2.70
   9  24   2    5.80    4.70
  10  25  -2   21.50    5.80
   9 -25  -2    6.00    3.30
  -9 -25   2   14.80    4.80
   9  25  -2   14.90    5.10
  -9  25   2    6.10    2.40
   8 -25  -2   -0.80    2.80
  -8 -25   2   -0.80    2.70
   8  25  -2   -9.10    3.20
  -8  25   2    2.70    2.00
   8  25  -2   -0.50    3.60
  -7 -25   2   61.89    5.70
   7 -25  -2   54.89    5.80
   7  25  -2   54.99    6.80
   7  25  -2   42.50    6.50
  -7  25   2   51.69    3.90
  -6 -25   2   15.30    3.30
   6 -25  -2   15.70    3.50
   6 -25  -2   14.10    3.50
   6  25  -2   18.00    4.40
  -6  25   2   18.10    2.70
   6  25  -2   16.90    4.50
   5 -25  -2   29.40    4.20
   5 -25  -2   38.60    4.40
  -5 -25   2   31.00    3.40
   5  25  -2   32.50    5.10
  -5  25   2   31.50    3.20
   5  25  -2   37.30    5.60
   4 -25  -2   16.40    3.50
  -4 -25   2   22.80    2.90
  -4 -25   2    9.30    3.60
  -4  25   2   21.10    2.60
   4  25  -2   13.70    3.80
  -4  25   2   23.80    4.60
  -3 -25   2   10.70    1.90
   3 -25  -2   10.40    3.00
  -3 -25   2    7.60    3.30
   3  25  -2   14.20    3.70
  -3  25   2    6.30    3.00
  -3  25   2   12.10    1.90
  -2 -25   2   31.70    2.50
  -2 -25   2   32.20    4.60
   2 -25  -2   36.30    4.40
  -2  25   2   33.90    4.60
   2  25  -2   36.70    5.20
  -2  25   2   32.10    2.40
  -1 -25   2   44.70    5.20
   1 -25  -2   48.00    4.80
   1  25  -2   56.19    2.80
  -1  25   2   49.60    5.50
  -1  25   2   54.69    3.00
   1  25  -2   55.49    5.60
   0 -25  -2   24.20    3.90
   0 -25   2   27.30    4.50
   0  25  -2   32.10    4.80
   0  25   2   35.20    4.90
   0  25   2   30.60    2.30
   0  25  -2   37.90    2.40
   1 -25   2   10.60    3.30
  -1 -25  -2    9.20    2.60
  -1 -25  -2   10.70    3.30
  -1  25  -2   10.90    1.60
  -1  25  -2   13.40    3.60
   1  25   2   13.30    3.60
   1  25   2    9.80    1.50
  -2 -25  -2   46.80    4.70
  -2 -25  -2   36.50    5.10
   2 -25   2   35.90    4.70
  -2  25  -2   51.29    6.40
   2  25   2   41.40    5.30
  -2  25  -2   41.60    2.90
  -3 -25  -2   36.80    4.60
  -3 -25  -2   36.00    5.10
   3 -25   2   30.90    4.20
  -3  25  -2   40.40    5.90
  -3  25  -2   42.20    3.10
   3  25   2   37.40    5.10
   4 -25   2   52.79    5.20
  -4 -25  -2   55.19    5.50
  -4 -25  -2   51.49    5.60
  -4  25  -2   53.69    3.80
   4  25   2   58.59    6.00
  -4  25  -2   76.49    7.60
  -5 -25  -2   58.19    6.80
   5 -25   2   64.09    5.80
  -5 -25  -2   65.29    6.30
   5 -25   2   55.29    4.80
  -5  25  -2   67.09    4.40
   5  25   2   74.89    6.70
   6 -25   2   18.40    3.90
  -6 -25  -2   15.10    4.50
   6 -25   2   11.50    3.10
   6  25   2   20.20    4.30
  -6  25  -2   20.60    3.30
  -7 -25  -2    5.90    4.20
   7 -25   2    7.50    3.30
  -7  25  -2    9.50    2.80
   7  25   2    7.00    3.80
  -8 -25  -2   -1.00    4.40
   8 -25   2   -1.90    2.60
   8  25   2   -0.70    3.40
  -8  25  -2   -1.00    2.20
   9 -25   2   51.89    6.40
  -9 -25  -2   54.29    8.70
  -9  25  -2   49.20    5.50
   9  25   2   54.89    8.00
  10  26  -2   19.70    6.30
  -9 -26   2    8.10    4.10
   9 -26  -2   12.30    4.20
   9  26  -2    6.00    4.50
  -9  26   2   13.70    3.20
  -8 -26   2    7.40    3.40
   8 -26  -2    9.70    3.40
  -8  26   2    8.40    2.50
   8  26  -2    7.30    4.20
   8  26  -2    1.30    4.30
   7 -26  -2   -3.20    2.00
  -7 -26   2    4.20    2.80
   7  26  -2    1.50    3.70
   7  26  -2    4.90    4.40
  -7  26   2   -0.90    1.60
   6 -26  -2   24.60    4.00
   6 -26  -2   19.00    4.10
  -6 -26   2   21.10    3.50
  -6  26   2   25.30    3.00
   6  26  -2   13.20    4.30
   6  26  -2   18.20    4.80
  -5 -26   2    9.60    2.50
   5 -26  -2   13.90    3.50
   5 -26  -2   12.40    3.20
   5  26  -2   15.80    4.40
  -5  26   2   13.10    2.40
   5  26  -2   12.10    4.20
  -4 -26   2    2.40    1.70
   4 -26  -2    2.50    2.50
  -4 -26   2   -2.30    2.60
   4  26  -2    1.80    3.00
  -4  26   2    2.70    3.20
  -4  26   2    5.30    1.80
  -3 -26   2   59.89    6.00
   3 -26  -2   59.79    5.30
  -3 -26   2   62.29    3.80
   3  26  -2   74.99    6.70
  -3  26   2   57.69    6.30
  -3  26   2   58.59    3.40
  -2 -26   2   23.00    4.30
  -2 -26   2   20.90    2.30
   2 -26  -2   14.70    3.40
  -2  26   2   21.80    2.30
   2  26  -2   25.40    4.70
  -2  26   2   20.30    4.20
  -1 -26   2  104.39    7.80
   1 -26  -2  106.29    6.90
  -1  26   2  110.39    7.60
   1  26  -2  115.09    4.50
   1  26  -2   96.09    7.40
  -1  26   2  116.19    4.70
   0 -26  -2  253.77   11.30
   0 -26   2  225.08   11.50
   0  26  -2  252.37   12.40
   0  26   2  266.87   12.20
   0  26  -2  288.47    8.60
   0  26   2  255.37    8.20
   1 -26   2   18.30    4.00
  -1 -26  -2   12.60    3.00
  -1 -26  -2   18.00    3.60
   1  26   2   18.20    1.80
  -1  26  -2   19.10    2.10
  -1  26  -2    9.60    3.70
   1  26   2   12.80    3.50
  -2 -26  -2    7.50    3.00
   2 -26   2    2.50    2.90
  -2 -26  -2    4.50    3.00
   2  26   2   10.20    3.40
  -2  26  -2    1.40    3.10
  -2  26  -2    8.00    1.90
   3 -26   2   53.69    5.10
  -3 -26  -2   44.80    5.30
  -3 -26  -2   54.39    5.60
  -3  26  -2   47.50    3.60
   3  26   2   56.29    5.90
  -3  26  -2   55.59    6.90
   4 -26   2   10.70    2.90
  -4 -26  -2   10.10    3.50
  -4 -26  -2   14.10    4.20
  -4  26  -2   13.00    2.40
  -4  26  -2   14.60    4.90
   4  26   2    9.60    3.60
   5 -26   2   31.60    5.10
  -5 -26  -2   24.80    4.90
   5 -26   2   24.90    3.90
  -5 -26  -2   22.10    4.20
  -5  26  -2   28.30    3.20
   5  26   2   27.30    4.80
   6 -26   2   35.60    5.00
  -6 -26  -2   34.90    5.80
   6 -26   2   33.00    4.40
   6  26   2   34.00    5.60
  -6  26  -2   48.40    4.40
  -7 -26  -2   -0.40    3.90
   7 -26   2   10.40    3.80
  -7  26  -2   14.80    3.20
   7  26   2    7.50    3.90
  -8 -26  -2   -2.80    4.60
   8 -26   2    1.40    3.40
   8  26   2   -5.10    2.90
  -8  26  -2    2.40    2.50
  -9 -26  -2    3.40    5.10
   9 -26   2    5.30    3.90
  -9  26  -2    4.70    3.00
   9  26   2    4.50    4.40
   9 -27  -2    3.20    3.50
  -9 -27   2   -2.30    3.50
   9  27  -2   11.00    4.90
  -9  27   2    2.80    2.40
   8 -27  -2   18.40    4.40
  -8 -27   2   12.70    4.00
  -8  27   2   13.90    2.90
   8  27  -2   19.50    5.50
   8  27  -2   12.30    4.80
  -7 -27   2    2.80    2.80
   7 -27  -2   -1.70    2.30
   7  27  -2    0.10    4.20
  -7  27   2    1.40    1.80
   7  27  -2    5.20    3.90
   6 -27  -2    7.10    3.10
  -6 -27   2    8.20    2.80
   6 -27  -2    7.30    3.10
   6  27  -2    3.80    3.50
   6  27  -2    7.90    4.10
  -6  27   2   10.00    2.30
  -5 -27   2  109.49    6.00
   5 -27  -2  125.79    7.80
  -5 -27   2  108.29    8.30
   5 -27  -2  117.39    7.40
  -5  27   2  114.19    8.80
   5  27  -2  124.89    8.70
  -5  27   2  107.49    5.50
   4 -27  -2   16.80    3.80
  -4 -27   2   16.70    4.20
  -4 -27   2   19.50    2.90
   4  27  -2   23.80    5.10
  -4  27   2   18.10    2.50
  -4  27   2   21.20    4.90
   3 -27  -2   41.30    5.10
  -3 -27   2   47.80    3.60
  -3 -27   2   58.49    6.10
  -3  27   2   51.89    3.60
   3  27  -2   45.50    6.00
  -3  27   2   56.59    5.80
  -2 -27   2   37.50    2.80
  -2 -27   2   43.00    5.50
   2 -27  -2   42.60    5.00
  -2  27   2   34.70    5.00
   2  27  -2   39.90    5.50
  -2  27   2   46.00    3.00
   1 -27  -2   37.20    4.90
  -1 -27   2   39.90    5.30
  -1  27   2   30.90    2.40
   1  27  -2   48.00    6.10
  -1  27   2   47.70    5.50
   0 -27  -2  236.28   11.30
   0 -27   2  282.07   12.20
   0  27   2  281.47    8.70
   0  27   2  283.47   12.50
   0  27  -2  248.78   12.70
   0  27  -2  286.07    8.80
   1 -27   2   22.30    4.30
  -1 -27  -2   11.80    3.80
   1  27   2   23.10    2.00
  -1  27  -2   17.10    4.30
   1  27   2   22.40    4.50
  -1  27  -2   15.90    2.10
   2 -27   2   15.20    4.10
  -2 -27  -2   16.70    3.70
  -2 -27  -2   15.80    3.90
  -2  27  -2   16.80    4.50
  -2  27  -2   14.30    2.10
   2  27   2   11.30    3.50
  -3 -27  -2    6.30    3.40
   3 -27   2    4.10    3.30
  -3 -27  -2    6.60    3.40
  -3  27  -2   10.10    2.20
   3  27   2    5.10    3.20
  -3  27  -2    4.20    3.70
  -4 -27  -2  106.59    7.80
   4 -27   2  109.49    6.90
  -4 -27  -2   94.19    7.10
   4  27   2  127.09    8.50
  -4  27  -2  110.29    9.40
  -4  27  -2  108.49    5.80
  -5 -27  -2   56.99    6.30
   5 -27   2   65.69    6.20
   5 -27   2   71.69    5.90
  -5 -27  -2   55.69    6.20
  -5  27  -2   53.79    4.10
   5  27   2   53.69    6.60
   6 -27   2   37.80    5.40
   6 -27   2   23.30    3.80
  -6 -27  -2   30.30    5.60
   6  27   2   29.20    5.40
  -6  27  -2   30.40    3.70
   7 -27   2   18.00    4.10
  -7 -27  -2   15.60    5.20
   7  27   2   19.30    4.90
  -7  27  -2   15.60    3.30
   8 -27   2   11.60    4.00
  -8 -27  -2    6.60    4.70
   8  27   2    8.70    4.60
  -8  27  -2   15.80    3.40
  -9 -27  -2   -1.90    4.80
   9 -27   2    3.30    3.40
  -9 -28   2   -4.00    4.20
   9 -28  -2    5.30    3.70
   9  28  -2    4.80    5.00
  -9  28   2    0.20    2.40
  -8 -28   2    2.90    3.50
   8 -28  -2    0.50    2.70
   8  28  -2    0.40    3.90
   8  28  -2    4.50    4.00
  -8  28   2    4.00    2.50
  -7 -28   2    8.90    3.70
   7 -28  -2    0.80    3.00
   7  28  -2    4.40    4.10
  -7  28   2    5.90    2.20
   7  28  -2   -2.20    4.00
  -6 -28   2    8.10    3.00
   6 -28  -2   12.80    3.50
   6 -28  -2   12.60    3.40
  -6 -28   2   10.30    4.30
  -6  28   2    9.20    2.30
   6  28  -2   13.10    4.40
   6  28  -2   10.60    4.40
   5 -28  -2   19.80    3.70
  -5 -28   2   16.40    3.00
   5 -28  -2   23.60    4.30
  -5 -28   2    9.80    3.80
  -5  28   2   15.40    4.80
  -5  28   2   20.60    2.80
   5  28  -2   29.60    5.60
   4 -28  -2   14.20    3.60
  -4 -28   2   17.30    2.90
  -4 -28   2   12.80    4.30
  -4  28   2   14.90    4.70
   4  28  -2   18.60    4.60
  -4  28   2   20.30    2.60
  -3 -28   2   61.89    6.80
  -3 -28   2   66.79    4.20
   3 -28  -2   56.79    5.50
   3  28  -2   51.29    6.50
  -3  28   2   67.89    6.40
  -3  28   2   65.29    3.70
   2 -28  -2   61.79    5.90
  -2 -28   2   63.09    6.30
  -2  28   2   70.19    6.40
   2  28  -2   94.09    7.90
  -2  28   2   68.69    3.70
  -1 -28   2  319.27   13.80
   1 -28  -2  322.47   13.40
   1  28  -2  342.17   15.10
  -1  28   2  363.46   10.90
  -1  28   2  350.26   14.70
   0 -28  -2  118.49    8.10
   0 -28   2   97.09    7.70
   0  28  -2  127.09    5.10
   0  28   2  117.49    8.10
   0  28  -2  123.49    8.80
   0  28   2  123.79    4.90
   1 -28   2   23.00    4.80
  -1 -28  -2   27.70    4.70
  -1  28  -2   34.80    2.60
   1  28   2   29.20    2.20
  -1  28  -2   22.90    5.00
   1  28   2   35.60    5.40
  -2 -28  -2   63.69    6.60
  -2 -28  -2   53.59    5.30
   2 -28   2   66.99    6.20
  -2  28  -2   73.29    7.70
   2  28   2   63.49    6.70
  -2  28  -2   72.09    4.10
  -3 -28  -2   37.70    5.10
  -3 -28  -2   29.90    5.10
   3 -28   2   28.80    4.60
  -3  28  -2   39.90    6.60
  -3  28  -2   35.10    3.10
   3  28   2   39.00    5.60
  -4 -28  -2    4.90    3.50
  -4 -28  -2   10.40    3.60
   4 -28   2    7.60    3.10
   4  28   2    3.80    3.40
  -4  28  -2    6.80    2.10
  -4  28  -2   15.10    5.00
   5 -28   2   25.40    4.10
   5 -28   2   34.00    5.10
  -5 -28  -2   17.60    4.40
  -5 -28  -2   22.60    5.30
   5  28   2   28.80    5.30
  -5  28  -2   33.70    3.80
  -6 -28  -2    6.60    4.30
   6 -28   2   13.40    3.30
   6 -28   2   13.50    4.20
  -6  28  -2   20.10    3.20
   6  28   2   17.80    4.90
  -7 -28  -2    6.90    4.50
   7 -28   2    7.00    3.20
   7  28   2   -0.30    3.60
  -7  28  -2    5.30    2.50
  -8 -28  -2    1.60    4.50
   8 -28   2    1.20    3.60
   8  28   2   -4.60    3.80
  -8  28  -2   -0.20    2.40
   9 -28   2    9.00    4.00
   9 -29  -2    3.20    3.40
  -9 -29   2    1.80    4.10
   9  29  -2    9.40    5.00
  -9  29   2   10.40    3.20
  -8 -29   2    2.10    3.80
   8 -29  -2    7.60    3.40
  -8 -29   2    3.60    4.40
  -8  29   2    5.50    2.50
   8  29  -2   -3.50    4.10
   8  29  -2    2.20    4.70
  -7 -29   2   24.30    4.30
  -7 -29   2   21.30    5.20
   7 -29  -2   21.40    4.60
   7  29  -2   14.20    4.90
  -7  29   2   22.90    3.40
   7  29  -2   15.50    4.90
   6 -29  -2    1.50    2.90
  -6 -29   2   -1.00    2.60
  -6 -29   2    2.60    3.50
   6 -29  -2   -0.40    2.60
  -6  29   2   -2.50    1.50
   6  29  -2    0.80    3.20
  -5 -29   2   36.40    4.00
  -5 -29   2   31.40    5.30
   5 -29  -2   35.30    4.90
  -5  29   2   36.40    3.40
  -5  29   2   33.30    5.90
   5  29  -2   41.10    6.10
  -4 -29   2   66.09    4.40
   4 -29  -2   59.49    5.70
  -4 -29   2   57.99    6.70
   4  29  -2   66.99    7.00
  -4  29   2   58.29    4.10
  -4  29   2   62.69    7.20
  -3 -29   2    5.70    3.50
  -3 -29   2    3.70    1.90
   3 -29  -2    6.90    3.00
   3  29  -2    3.10    3.30
  -3  29   2    6.50    3.40
  -3  29   2    3.80    1.70
   2 -29  -2   25.90    4.40
  -2 -29   2   32.50    5.30
  -2  29   2   30.10    2.70
   2  29  -2   24.00    4.90
  -2  29   2   35.30    5.50
  -1 -29   2   54.49    6.40
   1 -29  -2   65.69    6.10
   1  29  -2   75.19    7.10
  -1  29   2   70.99    6.60
  -1  29   2   74.79    3.90
   0 -29  -2   66.79    6.30
   0 -29   2   73.49    6.80
   0  29   2   79.69    3.80
   0  29   2   72.49    7.10
   0  29  -2   84.09    4.00
   0  29  -2   86.49    7.60
   1 -29   2   14.70    4.10
  -1 -29  -2   28.00    4.80
   1  29   2   17.20    4.30
  -1  29  -2   23.80    5.30
  -2 -29  -2    0.40    3.10
   2 -29   2   -1.40    2.70
  -2 -29  -2    4.90    3.00
  -2  29  -2    3.20    1.60
  -2  29  -2    2.90    3.40
   2  29   2    2.90    3.10
  -3 -29  -2   11.50    3.60
  -3 -29  -2   15.50    3.90
   3 -29   2   11.80    3.40
  -3  29  -2   20.30    2.80
   3  29   2    9.70    4.10
  -3  29  -2    4.10    3.80
  -4 -29  -2   29.80    5.20
  -4 -29  -2   26.50    5.00
   4 -29   2   23.90    4.30
   4  29   2   33.70    5.40
  -4  29  -2   41.00    7.10
  -4  29  -2   22.70    3.00
  -5 -29  -2    5.10    4.30
   5 -29   2    8.90    3.30
   5 -29   2    4.90    3.10
  -5 -29  -2   10.60    4.10
  -5  29  -2    9.80    2.50
   5  29   2    9.90    4.00
  -6 -29  -2   -4.30    3.80
   6 -29   2    0.70    2.90
   6  29   2    4.40    3.70
  -6  29  -2    5.70    2.30
  -7 -29  -2   28.00    6.40
   7 -29   2   16.20    4.40
   7  29   2   20.60    5.50
  -7  29  -2   21.50    3.70
  -8 -29  -2    4.20    5.70
   8  29   2    8.00    4.70
  -8  29  -2    3.00    2.80
   9 -30  -2    0.90    3.10
  -9 -30   2   -2.80    3.90
   9  30  -2    3.80    5.10
  -8 -30   2    4.10    3.80
  -8 -30   2    9.30    4.40
   8 -30  -2   14.50    4.30
   8  30  -2    4.10    4.20
  -8  30   2   10.30    3.00
   7 -30  -2    0.40    3.20
  -7 -30   2   -0.40    3.70
  -7 -30   2   -0.30    3.20
  -7  30   2    1.70    2.00
   7  30  -2    3.50    4.20
  -6 -30   2   24.60    5.10
  -6 -30   2   34.00    4.90
   6 -30  -2   25.80    4.60
   6 -30  -2   34.50    5.20
  -6  30   2   26.40    3.30
   6  30  -2   33.30    6.30
  -5 -30   2    5.30    3.60
   5 -30  -2    3.30    2.70
  -5 -30   2    3.30    2.30
  -5  30   2    6.80    2.10
   5  30  -2    1.00    3.50
  -5  30   2   -0.50    3.60
  -4 -30   2   11.30    4.10
   4 -30  -2   16.90    3.80
  -4 -30   2    7.40    2.60
  -4  30   2    7.00    4.10
   4  30  -2   11.50    4.20
  -4  30   2    9.70    2.20
   3 -30  -2   27.80    4.60
  -3 -30   2   22.70    5.20
  -3  30   2   20.60    4.60
  -3  30   2   20.60    2.60
   3  30  -2   20.60    5.20
  -2 -30   2   15.20    4.70
   2 -30  -2   21.80    4.30
  -2  30   2   20.40    4.60
   2  30  -2   15.40    4.50
  -2  30   2   19.10    2.30
   1 -30  -2  178.98    9.70
  -1 -30   2  165.38   10.00
   1  30  -2  169.68   10.50
  -1  30   2  185.08    6.70
  -1  30   2  188.68   10.60
   0 -30  -2   15.60    4.00
   0 -30   2   15.90    4.40
   0  30   2   19.60    2.10
   0  30  -2   15.30    4.70
   0  30  -2   16.70    2.20
   0  30   2   12.40    3.90
  -1 -30  -2  100.49    7.80
   1 -30   2   94.09    7.50
  -1  30  -2  108.09    5.10
   1  30   2  100.79    7.90
  -1  30  -2  120.29    9.00
  -2 -30  -2   38.50    5.40
   2 -30   2   47.70    5.70
   2  30   2   68.19    7.50
  -2  30  -2   57.39    7.20
  -2  30  -2   57.19    3.90
  -3 -30  -2   14.60    4.10
  -3 -30  -2   13.50    3.90
   3 -30   2   19.80    4.20
  -3  30  -2   14.90    4.90
  -3  30  -2   12.90    2.40
   3  30   2    8.80    3.90
   4 -30   2    4.30    2.90
  -4 -30  -2    2.20    3.60
  -4 -30  -2    0.10    3.30
   4  30   2    6.70    3.60
  -4  30  -2    2.90    3.90
  -4  30  -2    1.60    1.90
  -5 -30  -2   15.00    4.60
   5 -30   2   19.30    4.40
   5 -30   2   20.20    3.90
  -5 -30  -2   17.60    4.70
  -5  30  -2   17.90    3.00
   5  30   2   20.70    5.10
  -6 -30  -2   22.80    5.80
   6 -30   2   26.40    5.00
   6  30   2   24.40    5.40
  -6  30  -2   24.90    3.90
  -7 -30  -2   10.90    5.60
   7 -30   2   16.50    4.60
  -7  30  -2   18.60    3.50
   7  30   2   12.10    4.60
   8 -30   2    5.70    3.80
  -8 -30  -2    4.00    5.40
   8  30   2   -0.50    3.80
  -8  30  -2    6.40    3.00
   9 -31  -2    1.30    3.50
   8 -31  -2   15.80    4.60
  -8 -31   2   16.60    5.60
  -8 -31   2   12.00    4.90
  -8  31   2   10.00    2.90
   8  31  -2   11.50    5.00
   7 -31  -2    9.10    4.00
  -7 -31   2   11.50    4.50
  -7 -31   2   15.20    4.40
   7  31  -2    8.50    4.60
  -7  31   2   13.20    2.80
  -6 -31   2    4.80    4.20
   6 -31  -2    6.00    3.70
  -6 -31   2    3.20    3.20
   6  31  -2   -1.90    3.40
  -6  31   2    4.60    2.10
  -5 -31   2   69.69    5.60
  -5 -31   2   57.89    7.30
   5 -31  -2   52.89    6.00
  -5  31   2   68.49    8.20
   5  31  -2   68.79    8.10
  -5  31   2   54.59    4.10
  -4 -31   2   10.30    2.50
   4 -31  -2    8.60    3.40
  -4 -31   2    9.40    4.30
  -4  31   2    5.10    3.60
   4  31  -2   20.80    5.10
  -4  31   2   12.40    2.50
  -3 -31   2   33.00    5.50
   3 -31  -2   27.90    4.60
  -3  31   2   22.00    4.80
  -3  31   2   26.80    2.90
   3  31  -2   36.50    6.30
   2 -31  -2   97.79    7.20
  -2 -31   2   98.79    7.90
  -2  31   2   87.69    7.50
   2  31  -2  113.19    8.60
  -2  31   2  105.99    4.90
   1 -31  -2    5.10    3.10
  -1 -31   2    0.60    3.50
  -1  31   2    2.10    3.60
  -1  31   2    4.70    1.60
   1  31  -2    3.20    3.30
   0 -31  -2  101.79    7.90
   0 -31   2  105.99    8.30
   0  31   2  116.49    8.60
   0  31   2  127.79    5.10
   0  31  -2  106.79    8.80
  -1 -31  -2   39.30    5.60
   1 -31   2   28.00    5.10
  -1  31  -2   40.60    6.10
  -1  31  -2   39.10    3.00
   1  31   2   27.50    5.10
   2 -31   2    7.30    3.50
  -2 -31  -2   13.70    4.40
  -2  31  -2   13.80    2.30
  -2  31  -2    9.30    4.30
   2  31   2    9.10    3.90
  -3 -31  -2   18.90    4.40
   3 -31   2   15.70    3.80
  -3 -31  -2    8.30    3.60
  -3  31  -2   14.90    2.70
  -3  31  -2   10.90    4.50
   3  31   2   12.30    4.20
  -4 -31  -2    4.40    3.50
  -4 -31  -2    3.90    3.70
   4 -31   2    2.50    2.90
  -4  31  -2    2.40    3.90
   4  31   2   -1.80    3.50
  -4  31  -2    0.40    1.70
  -5 -31  -2   63.59    7.60
   5 -31   2   59.39    7.00
   5 -31   2   79.59    6.60
  -5 -31  -2   65.39    6.80
  -5  31  -2   64.09    4.80
   5  31   2   56.19    7.40
  -6 -31  -2   16.70    5.20
   6 -31   2   22.20    4.80
   6  31   2   21.00    5.30
  -6  31  -2   28.80    3.90
  -7 -31  -2   11.60    5.10
   7 -31   2   13.00    4.60
   7  31   2   13.10    4.90
  -7  31  -2   13.80    3.50
  -8 -31  -2    6.30    6.10
   8 -31   2    5.40    4.00
   8  31   2   12.20    5.60
  -8  31  -2    6.30    3.40
  -8 -32   2   12.40    5.40
  -8 -32   2    3.30    4.50
   8 -32  -2    6.50    4.00
   8  32  -2    0.40    4.60
  -8  32   2   13.90    3.10
  -7 -32   2    6.00    3.60
  -7 -32   2    4.30    4.60
   7 -32  -2    2.40    3.40
   7  32  -2    1.70    4.20
  -7  32   2    4.40    2.20
   6 -32  -2    4.70    3.20
  -6 -32   2   -3.50    3.90
  -6 -32   2    5.50    3.40
  -6  32   2    4.80    2.10
   6  32  -2    5.60    4.10
  -5 -32   2   14.60    3.70
  -5 -32   2   10.40    4.40
   5 -32  -2   11.50    3.60
  -5  32   2    8.30    4.20
  -5  32   2   14.80    2.60
   5  32  -2   16.50    5.40
  -4 -32   2    6.80    4.00
   4 -32  -2    7.90    3.30
  -4  32   2   12.00    4.40
  -4  32   2   11.50    2.40
   4  32  -2   14.90    4.60
  -3 -32   2   14.10    4.50
   3 -32  -2   13.00    3.70
  -3  32   2   20.60    2.90
   3  32  -2   13.50    4.70
  -3  32   2   17.60    4.60
  -2 -32   2    5.00    3.70
   2 -32  -2   13.40    3.70
   2  32  -2   14.10    4.50
  -2  32   2   16.20    2.50
  -2  32   2   15.30    4.60
   1 -32  -2    8.30    3.40
  -1 -32   2    9.50    4.60
  -1  32   2    4.30    3.90
  -1  32   2    5.90    1.80
   1  32  -2   11.70    4.60
   0 -32   2    6.30    4.20
   0 -32  -2   12.10    3.80
   0  32   2   11.70    4.40
   0  32   2   12.90    2.00
   0  32  -2   12.80    4.30
   1 -32   2   58.69    6.90
  -1 -32  -2   57.39    6.60
  -1  32  -2   61.39    3.90
   1  32   2   52.49    6.70
  -1  32  -2   65.49    7.90
  -2 -32  -2   46.80    6.10
   2 -32   2   40.10    5.80
  -2  32  -2   42.90    6.60
  -2  32  -2   52.09    3.80
   2  32   2   41.90    6.30
   3 -32   2   16.90    3.90
  -3 -32  -2    4.30    3.80
  -3  32  -2   14.70    2.50
  -3  32  -2   14.10    5.00
   3  32   2   15.70    4.50
  -4 -32  -2    4.90    3.50
  -4 -32  -2   10.70    4.20
   4 -32   2    5.80    3.20
  -4  32  -2    7.10    2.20
   4  32   2    5.60    3.90
  -4  32  -2   11.60    4.80
   5 -32   2   28.70    5.10
  -5 -32  -2   27.70    5.10
  -5 -32  -2   21.30    5.00
   5 -32   2   23.50    4.30
  -5  32  -2   29.50    3.70
   5  32   2   32.50    6.30
   6 -32   2    7.80    4.40
  -6 -32  -2   18.00    5.70
   6  32   2    7.30    4.40
  -6  32  -2   12.60    3.10
  -7 -32  -2    3.90    4.70
   7  32   2    5.10    4.90
  -7  32  -2    2.30    2.50
   8 -32   2    0.50    3.60
  -8 -32  -2    7.30    5.30
   8 -33  -2   16.60    4.50
  -8 -33   2   20.40    5.50
  -8 -33   2   21.40    5.80
  -8  33   2   18.50    3.60
   8  33  -2   22.70    6.00
  -7 -33   2   15.00    4.50
   7 -33  -2   17.70    4.50
  -7 -33   2   16.00    5.50
   7  33  -2   11.30    5.50
  -7  33   2   18.10    3.20
  -6 -33   2    5.90    3.50
   6 -33  -2    4.70    3.40
  -6 -33   2    0.20    3.60
  -6  33   2   -3.60    1.60
   6  33  -2   -1.50    4.00
  -5 -33   2    1.10    4.20
   5 -33  -2    5.20    3.10
  -5 -33   2    4.00    2.90
   5  33  -2    3.10    4.30
  -5  33   2    5.80    2.40
  -5  33   2    3.60    4.20
   4 -33  -2    8.20    3.50
  -4 -33   2    3.20    4.30
  -4  33   2    0.30    3.80
   4  33  -2    2.40    3.70
  -4  33   2    0.40    1.80
  -3 -33   2   36.00    6.40
   3 -33  -2   33.40    5.10
  -3  33   2   40.00    3.40
  -3  33   2   36.20    6.10
   3  33  -2   42.10    6.70
   2 -33  -2    3.00    2.90
  -2 -33   2    5.90    3.90
  -2  33   2    1.00    1.80
  -2  33   2    2.00    3.00
   2  33  -2   -0.50    3.20
  -1 -33   2    5.90    4.40
   1 -33  -2    7.90    3.50
   1  33  -2    1.70    3.40
  -1  33   2    7.40    2.00
  -1  33   2    2.80    3.60
   0 -33   2    2.50    3.70
   0 -33  -2    6.00    3.40
   0  33  -2    2.60    3.50
   0  33   2    4.00    3.60
   1 -33   2    5.10    3.60
  -1 -33  -2    8.00    3.90
   1  33   2    6.10    3.70
  -1  33  -2    5.60    1.90
  -1  33  -2    4.10    3.80
  -2 -33  -2    9.20    3.60
   2 -33   2    7.50    3.90
  -2  33  -2   12.50    5.00
  -2  33  -2    9.80    2.30
   2  33   2   17.50    5.00
  -3 -33  -2   14.70    4.30
   3 -33   2   11.90    3.70
   3  33   2    4.50    3.80
  -3  33  -2    7.30    4.60
  -3  33  -2   14.90    2.60
   4 -33   2   41.10    5.50
  -4 -33  -2   40.30    6.30
  -4  33  -2   70.99    8.90
  -4  33  -2   43.80    4.40
   4  33   2   45.60    6.80
  -5 -33  -2   -1.40    4.00
  -5 -33  -2    0.60    3.20
   5 -33   2    3.00    2.70
   5 -33   2    2.30    3.20
   5  33   2   -5.00    3.10
  -5  33  -2   -2.40    2.00
  -6 -33  -2    3.40    4.10
   6 -33   2    8.00    4.10
   6  33   2    1.30    3.90
  -6  33  -2   13.30    3.40
   7 -33   2    8.80    4.10
  -7 -33  -2   19.00    6.20
  -7  33  -2   13.60    3.50
   7  33   2   22.70    5.90
   8 -33   2    5.20    4.20
  -8 -33  -2   -3.50    4.80
  -8 -34   2   -1.20    4.60
  -8 -34   2    4.30    5.40
   8 -34  -2    7.20    3.80
   8  34  -2    0.20    4.30
   7 -34  -2    4.90    3.50
  -7 -34   2    3.50    4.20
  -7 -34   2    3.00    4.30
   7  34  -2    6.50    4.60
  -7  34   2   10.20    2.90
   6 -34  -2    8.10    4.20
  -6 -34   2   13.70    5.10
  -6 -34   2    4.00    3.70
   6  34  -2   18.20    5.80
  -6  34   2    9.20    2.60
   5 -34  -2    5.60    3.30
  -5 -34   2    7.00    4.30
  -5  34   2    2.20    2.00
   5  34  -2    6.10    4.50
  -5  34   2    4.60    4.10
   4 -34  -2    0.70    3.50
  -4 -34   2    3.10    3.90
  -4  34   2   -1.90    3.60
   4  34  -2    6.00    4.10
   3 -34  -2   17.80    4.20
  -3 -34   2   21.70    5.20
   3  34  -2   27.20    5.80
  -3  34   2   22.70    2.90
  -3  34   2   24.80    5.40
   2 -34  -2   72.19    6.70
  -2 -34   2   85.59    8.00
  -2  34   2   68.29    7.20
  -2  34   2   72.69    4.40
   2  34  -2   79.69    8.10
   1 -34  -2    3.90    3.30
  -1 -34   2    3.90    3.80
  -1  34   2    4.70    1.80
  -1  34   2    2.20    3.50
   1  34  -2    1.60    3.60
   0 -34  -2   16.20    4.20
   0 -34   2   16.00    4.40
   0  34  -2    7.30    4.20
   0  34   2   17.70    4.60
   1 -34   2   -0.10    3.30
  -1 -34  -2    3.90    3.50
  -1  34  -2    3.20    1.80
  -1  34  -2    4.80    4.30
   1  34   2    1.30    3.40
  -2 -34  -2   11.40    4.00
   2 -34   2   16.60    4.60
  -2  34  -2   19.00    2.90
  -2  34  -2   23.60    6.00
   2  34   2   19.90    5.10
  -3 -34  -2    0.30    3.30
   3 -34   2    6.10    3.60
  -3  34  -2    5.30    2.30
  -3  34  -2    0.70    4.10
   3  34   2    3.00    3.60
  -4 -34  -2    0.10    3.20
   4 -34   2    4.00    3.00
   4  34   2    4.90    4.00
  -4  34  -2    9.40    2.50
  -4  34  -2   -0.30    4.20
  -5 -34  -2    0.90    3.80
   5 -34   2   -0.30    3.50
   5 -34   2    3.30    2.80
  -5 -34  -2   -2.00    3.50
  -5  34  -2    1.10    2.10
   5  34   2    2.80    3.60
  -6 -34  -2   14.60    5.50
   6 -34   2   14.30    4.30
   6  34   2   15.30    5.70
  -6  34  -2   14.80    3.40
  -7 -34  -2    9.70    5.90
   7 -34   2   11.60    4.20
  -7  34  -2   10.10    3.50
   7  34   2    5.90    4.70
  -8 -35   2   28.80    6.60
   8 -35  -2   28.30    5.80
  -8 -35   2   23.70    6.50
  -7 -35   2   13.40    5.20
   7 -35  -2   18.60    4.80
  -7 -35   2    6.80    5.40
   7  35  -2   14.00    5.40
  -7  35   2    8.20    2.80
   6 -35  -2   -1.00    2.80
  -6 -35   2    9.10    4.50
  -6  35   2    3.50    2.30
   6  35  -2    2.80    4.20
  -5 -35   2    8.70    5.00
   5 -35  -2    6.60    3.50
   5  35  -2   12.10    5.00
  -5  35   2   -1.10    1.80
  -5  35   2    5.30    4.70
   4 -35  -2   20.50    4.70
  -4 -35   2   16.50    5.10
   4  35  -2   19.50    5.50
  -4  35   2    3.80    4.30
  -4  35   2   18.80    2.90
   3 -35  -2   11.60    4.10
  -3 -35   2   12.50    4.80
  -3  35   2   14.00    4.40
   3  35  -2   11.00    5.00
  -3  35   2   16.30    2.80
   2 -35  -2    0.60    2.80
  -2 -35   2   -1.00    3.90
  -2  35   2    5.30    2.00
   2  35  -2    6.00    3.90
  -2  35   2    2.40    3.60
  -1 -35   2   26.60    5.50
   1 -35  -2   31.70    5.40
  -1  35   2   28.70    3.00
  -1  35   2   31.50    5.70
   1  35  -2   26.40    5.80
   0 -35  -2   18.30    4.50
   0 -35   2   18.80    5.00
   0  35  -2   24.30    5.60
   0  35   2   34.80    6.20
  -1 -35  -2    7.00    3.60
   1 -35   2    6.80    3.70
  -1  35  -2   17.50    5.10
   1  35   2    8.50    4.20
   2 -35   2    5.30    3.50
  -2 -35  -2    8.60    4.20
  -2  35  -2    7.20    2.40
  -2  35  -2    2.80    3.90
   2  35   2    9.00    4.20
  -3 -35  -2   37.50    5.90
   3 -35   2   36.20    5.40
  -3  35  -2   31.10    6.40
   3  35   2   41.20    7.00
  -3  35  -2   38.20    4.10
  -4 -35  -2   -1.20    3.10
   4 -35   2    0.80    2.70
  -4  35  -2   -3.80    1.60
   4  35   2    1.80    3.60
  -4  35  -2    1.70    4.80
   5 -35   2    8.10    4.00
  -5 -35  -2   10.50    4.50
   5 -35   2   13.70    3.70
   5  35   2   12.30    5.00
  -5  35  -2   13.80    3.10
   6 -35   2    8.20    4.40
  -6 -35  -2    3.60    4.90
   6  35   2    5.30    4.40
   7 -35   2   -0.40    3.70
  -7 -35  -2   -2.80    4.20
   7  35   2   -1.80    3.90
  -7  35  -2    0.90    2.60
   7 -36  -2    1.80    3.30
  -7 -36   2    3.10    4.70
  -7 -36   2    4.90    4.60
   7  36  -2    2.60    4.60
  -7  36   2    7.60    2.80
   6 -36  -2    6.80    3.60
  -6 -36   2    2.80    4.70
   6  36  -2    7.10    4.90
   5 -36  -2   34.70    5.80
  -5 -36   2   26.20    6.00
  -5  36   2   43.70    4.30
  -5  36   2   38.20    7.10
   5  36  -2   51.19    7.60
   4 -36  -2    3.30    3.60
  -4 -36   2    3.50    4.60
   4  36  -2    4.00    4.30
  -4  36   2    1.60    4.20
  -4  36   2    5.00    2.50
  -3 -36   2    6.50    4.40
   3 -36  -2    3.70    3.50
  -3  36   2    1.90    1.80
   3  36  -2    2.50    4.20
  -3  36   2    5.50    4.40
   2 -36  -2    5.40    3.40
  -2 -36   2   -0.60    3.60
  -2  36   2    4.10    4.10
   2  36  -2    7.90    4.60
  -1 -36   2    9.40    4.40
   1 -36  -2   10.30    3.90
   1  36  -2   12.20    4.80
  -1  36   2    5.20    4.10
  -1  36   2    9.30    2.10
   0 -36  -2   14.90    4.20
   0 -36   2    4.40    4.00
   0  36   2   12.50    4.50
   0  36  -2    9.70    4.40
  -1 -36  -2   26.50    5.30
   1 -36   2   22.00    5.30
   1  36   2   24.60    5.50
  -1  36  -2   21.90    5.50
  -2 -36  -2    6.70    3.80
   2 -36   2    2.80    3.40
  -2  36  -2    8.20    4.70
  -2  36  -2    7.10    2.30
   2  36   2   12.10    4.50
   3 -36   2   12.40    4.20
  -3 -36  -2    1.60    3.80
  -3  36  -2   18.40    5.60
   3  36   2    6.90    4.30
  -4 -36  -2    9.00    4.50
   4 -36   2   18.70    4.50
  -4  36  -2   14.20    6.20
   4  36   2    9.00    4.60
  -5 -36  -2    2.20    4.10
   5 -36   2    7.60    3.30
   5 -36   2    6.70    4.10
   5  36   2    2.00    4.00
  -6 -36  -2   15.30    5.80
   6 -36   2   10.00    4.40
  -6  36  -2    8.80    3.10
   6  36   2   13.90    5.40
   7 -36   2   -0.50    3.80
  -7 -36  -2    0.70    5.30
   7 -37  -2   20.40    5.10
  -7 -37   2   16.20    6.40
   7  37  -2   28.60    7.40
  -6 -37   2   10.10    5.60
   6 -37  -2    4.50    3.90
  -6  37   2    8.60    3.10
   6  37  -2    8.90    5.30
  -5 -37   2   23.30    6.00
   5 -37  -2   22.70    4.90
   5  37  -2   18.10    6.00
  -5  37   2   22.90    3.60
  -4 -37   2   30.20    6.40
   4 -37  -2   30.80    5.50
  -4  37   2   17.40    5.70
  -4  37   2   31.00    3.60
   4  37  -2   32.60    6.90
  -3 -37   2   41.40    6.80
   3 -37  -2   42.80    5.90
  -3  37   2   41.00    7.00
  -3  37   2   44.70    3.90
   3  37  -2   45.20    7.40
   2 -37  -2    5.70    3.70
  -2 -37   2    3.20    4.30
  -2  37   2    7.60    2.30
  -2  37   2   10.10    4.70
   2  37  -2    2.80    4.20
   1 -37  -2   12.20    4.00
  -1 -37   2    2.80    4.50
  -1  37   2   10.10    4.80
   1  37  -2   14.30    5.60
   0 -37   2   17.50    4.90
   0 -37  -2   14.00    4.50
   0  37   2   20.20    5.40
   0  37  -2   15.50    5.20
  -1 -37  -2   10.70    4.10
   1 -37   2   12.60    4.50
   1  37   2    5.20    4.10
  -1  37  -2    7.10    4.90
   2 -37   2   22.40    4.80
  -2 -37  -2   19.60    5.00
   2  37   2   21.50    5.60
  -2  37  -2   21.20    3.10
  -2  37  -2   16.40    6.00
  -3 -37  -2   18.70    4.90
   3 -37   2   17.90    4.70
  -3  37  -2   15.80    3.10
  -3  37  -2   15.60    5.50
   3  37   2   16.10    5.20
[truncated: 945,617 more chars]
